# Supplementary material for: The effects of temperature and donor piglet age on the transcriptomic profile and energy metabolism of myoblasts
Source: Front Physiol. 2022 Sep 21;13:979283. doi: 10.3389/fphys.2022.979283 (PMC9532859; doi:10.3389/fphys.2022.979283)
Supplement: Supplementary file 1 [file Table1.xlsx]

## Sheet: overview
The effects of temperature and donor piglet age on the transcriptomic profile and energy metabolism of myoblasts
Supplemental Material
Katharina Metzger 1,2,●,† , Claudia Kalbe 1,● , Puntita Siengdee 2,˳ , Siriluck Ponsuksili 2*
1Institute of Muscle Biology and Growth, 2Institute of Genome Biology, Research Institute for Farm Animal Biology (FBN), Wilhelm-Stahl-Allee 2, 18196 Dummerstorf, Germany
● Contributed equally to this work
† Present address: Institute of Institute of Behavioural Physiology, Research Institute for Farm Animal Biology (FBN), Wilhelm-Stahl-Allee 2, 18196 Dummerstorf, Germany
˳ Present address: Chulabhorn Graduate Institute, Program in Applied Biological Sciences, Chulabhorn Royal Academy, Kamphaeng Phet 6 Road, Laksi, Bangkok, 10210, Thailand
* Correspondence: Siriluck Ponsuksili
ponsuksili@fbn-dummerstorf.de

## Sheet: Table S1
Table S1: Least square mean (LSM), Fold change, P value and adjusted P (FDR) < 5% with colour coding of all differentially expressed genes of myoblasts after 72 h of proliferation permanently cultured at 35°, 39° or 41°C compared to 37°C.
Probeset	anno_name_local	LSM 35°C	LSM 37°C	LSM 39°C	LSM 41°C	Fold change 35°C vs. 37°C	Fold change of 39°C vs. 37°C	Fold change 41°C vs. 37°C	P value 35°C vs. 37°C	P value 39°C vs. 37°C	P value 41°C vs. 37°C	FDR 35°C vs. 37°C	FDR 39°C vs. 37°C	FDR 41°C vs. 37°C
SNOWBALL_009033_s_st	DHRS3	3.9315	6.29141	7.95427	8.56921	-5.13339	3.16645	4.84938	< 0.001	< 0.001	< 0.001	9.3139e-07	2.80359e-05	1.31808e-06
SNOWBALL_024638_s_st	RASSF4	4.13065	5.73342	6.75228	6.86646	-3.03727	2.02632	2.19321	< 0.001	0.0009	0.0004	0.000418796	0.0127038	0.00636037
SNOWBALL_003674_s_st	LOC110258914	2.82514	4.29409	5.7628	6.91671	-2.76821	2.76774	6.15868	0.0005	0.0005	< 0.001	0.00831949	0.00832809	7.33815e-05
SNOWBALL_031797_st	AGBL3	4.11287	5.54847	5.67944	5.50917	-2.70494	1.09503	-1.02761	< 0.001	0.6352	0.8864	0.00189531	0.833259	0.955863
SNOWBALL_044059_st	AGBL3	3.56625	4.97174	5.0828	5.09056	-2.64908	1.08002	1.08585	< 0.001	0.5849	0.5592	0.000166546	0.803196	0.786954
SNOWBALL_007529_st	KANSL2	5.51808	6.90417	4.38372	4.0287	-2.6137	-5.73763	-7.33845	0.0019	< 0.001	< 0.001	0.0210729	0.000248668	7.43326e-05
SNOWBALL_017069_st	RASSF4	4.5696	5.92556	6.90524	7.19929	-2.55967	1.97204	2.41787	< 0.001	< 0.001	< 0.001	1.23715e-06	2.91403e-05	2.29645e-06
SNOWBALL_017358_st	ANKRD1	7.55048	8.90284	9.75985	10.6185	-2.5533	1.81128	3.28458	< 0.001	< 0.001	< 0.001	7.80956e-07	6.50361e-05	7.43591e-08
SNOWBALL_010643_st	RHCG	6.46659	7.66879	8.40163	8.39751	-2.3009	1.6619	1.65716	< 0.001	0.0003	0.0003	9.86419e-05	0.00583782	0.00607538
SNOWBALL_019712_st	AGBL3	5.69986	6.88164	7.04969	6.84257	-2.26857	1.12354	-1.02745	< 0.001	0.422	0.8505	0.000927722	0.688604	0.940584
SNOWBALL_016959_s_st	LOXL4	5.48025	6.63777	7.21391	7.62331	-2.23074	1.49085	1.98005	< 0.001	< 0.001	< 0.001	1.61792e-06	0.00105676	7.6879e-06
SNOWBALL_025538_st		4.23996	5.37669	6.22778	6.25589	-2.19883	1.80386	1.83936	< 0.001	0.0003	0.0002	0.000494373	0.00486645	0.0038466
SNOWBALL_024907_s_st	LOXL4	5.18164	6.26623	6.73757	7.08859	-2.12077	1.38639	1.76829	< 0.001	0.0063	< 0.001	0.000133365	0.0499852	0.00146215
SNOWBALL_017791_s_st	TLR3	4.14911	5.20633	5.77195	5.90174	-2.08092	1.48002	1.61935	0.0002	0.0226	0.0068	0.00455519	0.120021	0.0529287
SNOWBALL_004795_st	OMD	4.75756	5.81233	6.24531	6.64032	-2.07739	1.35002	1.77521	< 0.001	0.0157	< 0.001	0.000311705	0.0939434	0.00231481
SNOWBALL_030199_st		3.19413	4.24791	5.24895	5.54181	-2.07596	2.00144	2.4519	0.0001	0.0002	< 0.001	0.00309391	0.00451876	0.000598154
SNOWBALL_000364_s_st	TLR3	5.18572	6.22937	6.97897	7.02116	-2.06145	1.68132	1.73122	0.002	0.0176	0.013	0.0220308	0.101503	0.0824241
SNOWBALL_011426_st	LOC100513671	4.67276	5.67824	6.15053	6.14669	-2.00761	1.38731	1.38362	< 0.001	0.0083	0.0087	0.000393263	0.0606016	0.0627958
SNOWBALL_003223_st	ITGA11	5.92074	6.89614	7.76233	8.19422	-1.96618	1.82285	2.45902	< 0.001	< 0.001	< 0.001	2.42662e-05	7.49365e-05	1.50976e-06
SNOWBALL_017798_s_st	TLR3	7.22356	8.18336	8.94121	8.90775	-1.94503	1.69098	1.6522	< 0.001	0.0008	0.0012	0.00221193	0.0116258	0.0153288
SNOWBALL_003889_st	LOC102158467	3.39619	4.28943	3.87947	3.99396	-1.85734	-1.32864	-1.22728	0.0043	0.1464	0.2875	0.0380251	0.390033	0.567294
SNOWBALL_027076_st	DES	8.01433	8.90738	8.97935	8.38481	-1.8571	1.05116	-1.43651	< 0.001	0.5443	0.0004	7.60425e-05	0.777434	0.00636329
SNOWBALL_029070_s_st	ELN	5.61668	6.5031	6.88395	6.68133	-1.84858	1.30211	1.1315	< 0.001	0.0124	0.2057	0.000321114	0.0797625	0.472954
SNOWBALL_022273_s_st	PHYH	5.57601	6.45169	7.13681	7.14576	-1.83487	1.60783	1.61783	0.0012	0.0072	0.0066	0.0150398	0.0548724	0.0517286
SNOWBALL_000350_st	SCD	6.13423	7.00564	7.52149	7.22368	-1.82944	1.42984	1.16315	< 0.001	0.0009	0.1062	0.000221234	0.0125945	0.323143
SNOWBALL_028382_st	AGBL3	5.63491	6.50515	6.52293	6.47684	-1.82797	1.0124	-1.01982	< 0.001	0.9073	0.8529	0.000932095	0.964474	0.941675
SNOWBALL_001546_st	MAPK10	2.30818	3.17715	3.24711	3.762	-1.82636	1.04969	1.49989	0.0046	0.7941	0.0413	0.0398041	0.915036	0.179368
SNOWBALL_027852_st		3.50868	4.36949	4.59689	4.44536	-1.81604	1.17072	1.054	0.002	0.3439	0.7491	0.0217576	0.621714	0.893538
SNOWBALL_020915_s_st	F3	6.78647	7.63112	8.32331	8.34545	-1.79582	1.61574	1.64072	< 0.001	0.0005	0.0004	0.00187294	0.00795843	0.00643875
SNOWBALL_024602_st	PPP1R3C	4.89163	5.70346	6.38565	6.36568	-1.75544	1.60457	1.58251	< 0.001	< 0.001	< 0.001	0.000247179	0.00109508	0.00139871
SNOWBALL_001513_st	TGFB3	6.49763	7.29571	7.85038	7.61001	-1.73879	1.46883	1.24341	0.0001	0.0032	0.0678	0.00308303	0.031192	0.245735
SNOWBALL_030407_st	SSPN	4.96621	5.75461	6.20014	6.32112	-1.72716	1.36181	1.48094	< 0.001	0.0053	0.0008	0.00105689	0.0444355	0.0117199
SNOWBALL_018576_st	C1QTNF3	5.49541	6.27886	7.55589	7.98487	-1.72125	2.42339	3.26258	0.0001	< 0.001	< 0.001	0.00302504	4.48292e-05	2.7198e-06
SNOWBALL_021881_s_st		2.87293	3.64316	4.72391	4.93892	-1.70554	2.11513	2.45506	0.0002	< 0.001	< 0.001	0.00398178	0.00025202	4.71634e-05
SNOWBALL_020694_st		2.27222	3.03694	2.61613	2.7567	-1.69903	-1.33868	-1.2144	0.0052	0.0939	0.253	0.0435229	0.300281	0.529978
SNOWBALL_046136_st	ARL15	4.72678	5.48441	5.49178	5.60893	-1.6907	1.00512	1.09014	< 0.001	0.9592	0.3926	0.00177462	0.984704	0.664529
SNOWBALL_036499_st	LOC100524727	9.31195	10.0658	10.5478	10.5446	-1.68626	1.39665	1.3936	< 0.001	0.0027	0.0028	0.00131558	0.0270587	0.0280257
SNOWBALL_005569_st	WISP1	7.65278	8.40254	8.72649	8.73125	-1.68151	1.25176	1.2559	< 0.001	0.019	0.0176	0.000658182	0.106934	0.101506
SNOWBALL_029916_st	CRYBG3	3.73935	4.48725	5.00697	4.97564	-1.67934	1.43367	1.40288	0.0005	0.0082	0.012	0.00808741	0.0600876	0.0780285
SNOWBALL_019162_st	NOL4L	4.20583	4.95	5.32829	5.80683	-1.675	1.2998	1.81106	0.0004	0.0391	0.0001	0.00715319	0.173008	0.0025884
SNOWBALL_016141_st	CCDC80	7.20597	7.93876	8.41924	8.67806	-1.66185	1.3952	1.66936	< 0.001	< 0.001	< 0.001	1.03753e-05	0.000525379	9.5141e-06
SNOWBALL_033555_st	PTGIS	5.76518	6.49708	7.58939	7.85166	-1.66083	2.13215	2.55722	0.0003	< 0.001	< 0.001	0.00514472	0.00019939	2.67036e-05
SNOWBALL_015614_st	FBLN2	8.71316	9.44006	9.75327	10.1314	-1.65508	1.24247	1.61478	< 0.001	0.001	< 0.001	1.17459e-05	0.0131324	1.91874e-05
SNOWBALL_022238_st		6.21108	6.93011	7.35137	7.88195	-1.64608	1.33909	1.93434	< 0.001	0.0002	< 0.001	3.23416e-05	0.00330213	2.15449e-06
SNOWBALL_010708_st	TEP1	6.82109	7.53868	7.80017	7.68952	-1.64443	1.19872	1.11022	< 0.001	0.0023	0.0525	6.25763e-06	0.0239519	0.209025
SNOWBALL_019695_s_st	PTN	7.64911	8.36639	8.47983	8.44621	-1.64408	1.0818	1.05688	< 0.001	0.311	0.4723	0.00029761	0.591022	0.727318
SNOWBALL_018452_st	KIF1A	5.92118	6.63032	6.92318	6.63956	-1.63483	1.22507	1.00643	< 0.001	0.0104	0.9282	0.000173516	0.0709397	0.973084
SNOWBALL_017208_s_st	PPP1R3C	5.41722	6.12094	6.52396	6.60136	-1.6287	1.32227	1.39515	< 0.001	0.0066	0.0019	0.0015403	0.0517585	0.0209896
SNOWBALL_044927_st		3.71559	4.41736	4.45317	4.4897	-1.6265	1.02513	1.05142	0.0009	0.8388	0.6817	0.0125539	0.935327	0.859014
SNOWBALL_038202_st		3.39128	4.09093	4.00171	3.4491	-1.62411	-1.06379	-1.56031	< 0.001	0.5133	0.0002	0.00206185	0.756351	0.00394978
SNOWBALL_034508_st	ZBTB7C	6.14386	6.84016	7.22414	7.15897	-1.62035	1.30494	1.2473	< 0.001	0.0003	0.0013	3.04468e-05	0.00489762	0.016427
SNOWBALL_014023_s_st	PCDH9	6.05191	6.74342	7.12776	6.91598	-1.61497	1.30527	1.12706	0.001	0.0393	0.3286	0.0128262	0.173668	0.60771
SNOWBALL_012220_st	SERPINH1	9.12166	9.80581	10.321	10.8832	-1.60676	1.42919	2.11024	< 0.001	< 0.001	< 0.001	3.86493e-05	0.000513205	4.63514e-07
SNOWBALL_037015_st	WISP1	5.98306	6.655	7.07722	7.20013	-1.59322	1.33999	1.45915	< 0.001	0.0012	0.0001	0.000474248	0.0148679	0.00259473
SNOWBALL_041380_st	ARL15	4.93559	5.60609	5.83073	5.94077	-1.59162	1.16849	1.2611	0.0007	0.1775	0.0518	0.00987463	0.435235	0.207126
SNOWBALL_009847_s_st	PSMB8	5.70364	6.37307	6.58782	6.57798	-1.59045	1.16051	1.15261	0.0006	0.1939	0.2141	0.00961718	0.457595	0.48334
SNOWBALL_026223_s_st	F3	6.41643	7.08396	7.81823	7.86054	-1.58835	1.66356	1.71306	0.0033	0.0016	0.001	0.0317035	0.0187109	0.0134003
SNOWBALL_017931_st	PDK1	7.29782	7.96266	8.5066	8.42514	-1.58539	1.45795	1.37791	< 0.001	< 0.001	< 0.001	9.75038e-05	0.000585876	0.00219126
SNOWBALL_000025_st	SMPDL3A	6.11602	6.77799	7.25065	6.95562	-1.58223	1.38767	1.13103	< 0.001	< 0.001	0.0434	4.22659e-05	0.000873835	0.184925
SNOWBALL_001474_st	ISLR	5.30203	5.96366	6.18809	6.3274	-1.58186	1.16832	1.28676	< 0.001	0.0905	0.01	0.00186796	0.293332	0.0690341
SNOWBALL_013283_s_st	RGS7	4.74184	5.40143	5.48847	5.52354	-1.57963	1.06219	1.08832	0.006	0.6817	0.566	0.0482873	0.859014	0.791346
SNOWBALL_000787_st	NOV	6.7455	7.40251	7.72703	8.67359	-1.57681	1.25225	2.41342	0.0016	0.0787	< 0.001	0.0183798	0.26926	0.000113479
SNOWBALL_044880_st		4.24965	4.90611	4.98969	5.0525	-1.57622	1.05964	1.1068	0.0046	0.6808	0.4737	0.040131	0.858547	0.728324
SNOWBALL_007174_st	RIMKLB	6.10124	6.75758	7.03252	7.11183	-1.57607	1.20995	1.27832	0.0001	0.0475	0.0138	0.00245948	0.196033	0.0858075
SNOWBALL_019676_st	FAM180A	5.86767	6.52261	6.93394	7.0155	-1.57456	1.32991	1.40725	0.0035	0.0475	0.0204	0.0330526	0.195995	0.112243
SNOWBALL_005391_st	PKDCC	6.56775	7.22249	7.56773	7.64499	-1.57434	1.27036	1.34025	< 0.001	0.0041	0.0008	0.000428686	0.0369237	0.011776
SNOWBALL_004866_st	ASPN	8.68729	9.33926	9.91884	9.75919	-1.57132	1.49441	1.33786	0.001	0.0026	0.0199	0.01326	0.026229	0.110101
SNOWBALL_035809_st	WNT2B	2.76713	3.41848	3.27129	3.16566	-1.57064	-1.10741	-1.19153	0.0004	0.3328	0.1056	0.00716561	0.611487	0.321925
SNOWBALL_027681_st	SCRN1	6.37611	7.01994	7.20417	6.9542	-1.56247	1.13621	-1.04662	< 0.001	0.082	0.5173	0.000354738	0.276125	0.759189
SNOWBALL_002654_st	ZBTB7C	6.40112	7.03973	7.26867	7.22994	-1.55682	1.17198	1.14093	< 0.001	0.0449	0.0895	0.000627554	0.18926	0.291393
SNOWBALL_038797_st		4.12975	4.76747	5.00256	4.82693	-1.55586	1.17698	1.04208	0.0024	0.2028	0.7413	0.0249753	0.469168	0.889736
SNOWBALL_000363_s_st	TLR3	6.321	6.9553	7.5841	7.66646	-1.55219	1.54627	1.63711	0.0039	0.0041	0.0016	0.0355094	0.0370848	0.0190167
SNOWBALL_018170_s_st	MYL1	5.1587	5.7861	6.79621	6.82664	-1.54478	2.01407	2.057	< 0.001	< 0.001	< 0.001	0.000109983	1.11966e-06	8.34104e-07
SNOWBALL_035904_st	SLC16A3	4.11319	4.74054	5.07137	5.22138	-1.54472	1.25774	1.39556	0.0023	0.0742	0.0135	0.0242489	0.259857	0.0845773
SNOWBALL_000594_st	PTN	6.1761	6.80179	6.97715	7.00308	-1.54294	1.12925	1.14973	< 0.001	0.1399	0.0936	0.00133567	0.380013	0.299589
SNOWBALL_027937_st	LRP1	6.7104	7.33291	7.52849	7.8508	-1.53955	1.14518	1.43186	< 0.001	0.0418	< 0.001	0.00016986	0.180784	0.000848425
SNOWBALL_006299_st	WNT2B	5.43739	6.05959	5.91141	5.84069	-1.53922	-1.10817	-1.16384	< 0.001	0.2224	0.0791	0.00181586	0.493716	0.270066
SNOWBALL_018636_st	ARL15	8.34691	8.96897	9.20225	9.1539	-1.53908	1.1755	1.13676	< 0.001	0.0013	0.0073	4.36703e-06	0.0163733	0.0550791
SNOWBALL_027309_st	NDRG1	7.29583	7.91755	8.3616	8.4088	-1.53871	1.36042	1.40567	< 0.001	0.0003	0.0001	0.000398594	0.0056858	0.002724
SNOWBALL_000378_st	IGFBP5	7.753	8.36786	8.87107	9.38048	-1.53142	1.41736	2.01757	0.0015	0.0064	< 0.001	0.0177408	0.0507292	0.000455842
SNOWBALL_017936_st	LIMS2	6.72184	7.33546	7.92945	7.83439	-1.5301	1.50941	1.41316	0.0005	0.0007	0.0029	0.00840216	0.0103879	0.0288105
SNOWBALL_028104_st	PCDH9	4.21273	4.82584	5.21948	5.23247	-1.52955	1.3137	1.32559	0.0031	0.0403	0.0349	0.0302763	0.176426	0.160647
SNOWBALL_003551_st	SVEP1	7.21094	7.81843	8.17896	8.24421	-1.5236	1.2839	1.3433	< 0.001	0.0009	0.0002	0.00022481	0.0125523	0.00409567
SNOWBALL_041820_st		3.39984	4.00532	4.09773	4.40502	-1.52148	1.06615	1.31924	0.005	0.626	0.0472	0.0422622	0.827925	0.195384
SNOWBALL_020923_st	ITPR1	4.31694	4.9214	5.17536	5.22903	-1.52042	1.19248	1.23767	0.005	0.1912	0.1178	0.0427412	0.454	0.343507
SNOWBALL_037194_st	SLC8A3	5.75106	6.35239	7.16167	7.67765	-1.51711	1.75235	2.50579	0.0003	< 0.001	< 0.001	0.00559838	0.000549917	5.52496e-06
SNOWBALL_007000_s_st	NPFF	4.23277	4.83238	4.54379	4.6887	-1.51531	-1.22145	-1.10472	0.0046	0.1324	0.4414	0.0398887	0.367835	0.704095
SNOWBALL_016337_st	CLU	9.95496	10.5523	11.0737	11.4578	-1.51294	1.43529	1.87323	< 0.001	< 0.001	< 0.001	6.81498e-06	2.56087e-05	1.14997e-07
SNOWBALL_005576_st	NDRG1	8.04539	8.63792	9.13085	9.11367	-1.50788	1.4073	1.39064	< 0.001	< 0.001	< 0.001	1.70581e-05	9.80961e-05	0.000135954
SNOWBALL_012820_s_st	NECTIN1	4.76866	5.36078	5.29598	5.03689	-1.50745	-1.04594	-1.2517	< 0.001	0.5215	0.0048	0.000704308	0.762094	0.0410151
SNOWBALL_016086_st	SLC35A5	5.32181	5.91368	6.48457	6.69705	-1.50719	1.48544	1.72115	0.0013	0.0017	< 0.001	0.0157165	0.0194295	0.00230426
SNOWBALL_008453_st	ATF5	5.37076	5.96241	6.14729	6.30607	-1.50697	1.13672	1.26897	< 0.001	0.0338	0.0005	0.000103541	0.157327	0.00840368
SNOWBALL_018965_s_st	ARSJ	6.1562	6.74337	7.1591	7.18331	-1.50229	1.33398	1.35655	< 0.001	0.0006	0.0004	0.000678404	0.00916996	0.00627719
SNOWBALL_033907_st	TMEM119	8.13182	8.71682	8.84758	8.71729	-1.50004	1.09486	1.00032	< 0.001	0.0496	0.994	9.82119e-06	0.201516	0.997789
SNOWBALL_020924_st	ITPR1	5.53223	6.11606	6.31641	6.47667	-1.49883	1.14898	1.28397	0.0003	0.1355	0.0121	0.00559314	0.372939	0.0785188
SNOWBALL_047769_st	DES	5.57083	6.15459	6.28234	5.92146	-1.49876	1.09258	-1.17539	< 0.001	0.2722	0.0544	0.0022082	0.551008	0.213721
SNOWBALL_015746_st	ITPR1	5.84581	6.42874	6.71241	6.78015	-1.49789	1.21729	1.27581	0.0007	0.0601	0.0234	0.0106981	0.227665	0.12282
SNOWBALL_035911_st	MTSS1	2.94113	3.52236	4.31981	4.37762	-1.49612	1.73803	1.80909	0.005	0.0004	0.0002	0.0424785	0.00671498	0.00409229
SNOWBALL_035423_st	TMEM245	3.94215	4.52277	4.5727	4.88619	-1.49549	1.03522	1.28647	0.0022	0.7577	0.0363	0.0232523	0.897728	0.164993
SNOWBALL_006352_st	CSF1	8.64579	9.22491	9.28629	9.13428	-1.49393	1.04346	-1.06483	< 0.001	0.5422	0.3715	0.000826523	0.776116	0.646475
SNOWBALL_005338_st	PREPL	5.91092	6.48925	6.9734	7.10182	-1.49312	1.39876	1.52898	0.0002	0.0009	< 0.001	0.00371426	0.012391	0.00241261
SNOWBALL_021003_s_st	PHYH	6.81926	7.39737	7.82002	7.85417	-1.4929	1.34038	1.3725	< 0.001	0.0016	0.0008	0.00221502	0.0185078	0.0115882
SNOWBALL_041596_st	DAB2	3.11483	3.69267	3.77109	3.59213	-1.49261	1.05586	-1.07217	0.004	0.6553	0.5679	0.0365764	0.844604	0.792559
SNOWBALL_017945_s_st	CHRNA1	6.28058	6.85773	7.85742	7.79884	-1.4919	1.99958	1.92001	< 0.001	< 0.001	< 0.001	0.00210611	1.56724e-05	2.84613e-05
SNOWBALL_006646_s_st	CSF1	7.27514	7.85171	7.88488	7.77937	-1.4913	1.02326	-1.05142	< 0.001	0.7368	0.4666	0.000749603	0.887553	0.723219
SNOWBALL_035562_st	ELN	5.55866	6.13276	6.39302	6.36698	-1.48875	1.19769	1.17627	0.0009	0.0856	0.1186	0.0127462	0.283551	0.344921
SNOWBALL_006894_s_st	MYL6B	4.21803	4.78875	4.9243	4.94195	-1.48527	1.09851	1.11204	0.001	0.3547	0.2974	0.0133373	0.631545	0.577475
SNOWBALL_009774_st	CMAH	6.02095	6.59149	6.71174	6.64138	-1.48508	1.08692	1.03519	0.0002	0.3356	0.6859	0.00459735	0.613983	0.861323
SNOWBALL_011846_s_st	ARSJ	6.81464	7.38508	7.87702	7.92515	-1.48498	1.40633	1.45404	< 0.001	< 0.001	< 0.001	0.000309279	0.00109155	0.000498775
SNOWBALL_013933_s_st	PCDH9	5.6744	6.24249	6.52811	6.44116	-1.48256	1.21894	1.14764	0.0003	0.0325	0.1229	0.00498363	0.153175	0.352049
SNOWBALL_014803_s_st	CHD3	5.42105	5.9886	6.00864	6.02405	-1.482	1.01398	1.02488	0.0007	0.8845	0.7972	0.0103012	0.954989	0.916568
SNOWBALL_011465_st	SFRP2	9.92021	10.487	11.0603	11.3011	-1.48123	1.4879	1.75822	< 0.001	< 0.001	< 0.001	0.00210919	0.0019315	9.39772e-05
SNOWBALL_012753_st	THY1	8.80655	9.36764	9.53228	9.41273	-1.47538	1.12088	1.03175	< 0.001	0.0901	0.6279	0.000561909	0.292489	0.829032
SNOWBALL_003870_s_st	GSN	6.36059	6.91869	7.10114	6.84445	-1.47233	1.13481	-1.05281	0.0003	0.148	0.545	0.00504631	0.392587	0.777786
SNOWBALL_000799_st	ZFPM2	4.47816	5.03582	5.00366	5.03656	-1.47189	-1.02254	1.00051	< 0.001	0.7702	0.9946	0.00236397	0.903522	0.997962
SNOWBALL_028233_st	ARL15	7.43773	7.99294	8.36328	8.37848	-1.46939	1.29265	1.30634	0.0003	0.0069	0.0053	0.00510249	0.0534122	0.0443883
SNOWBALL_033160_st	UST	7.70906	8.26301	8.55452	8.55295	-1.4681	1.22393	1.22259	< 0.001	0.0051	0.0053	0.00055127	0.043092	0.0442233
SNOWBALL_033665_st	PATJ	3.79168	4.34428	4.25733	4.62189	-1.46673	-1.06212	1.21219	0.0033	0.5945	0.1021	0.0314329	0.809059	0.315591
SNOWBALL_003801_s_st	GSN	6.5816	7.13413	7.45518	7.06442	-1.46665	1.24924	-1.0495	0.0041	0.0695	0.6783	0.0367747	0.249482	0.857255
SNOWBALL_039973_st	BHLHE40	8.17591	8.72729	9.22201	9.18534	-1.46549	1.40905	1.37369	0.0002	0.0004	0.0009	0.00339614	0.00732258	0.0120773
SNOWBALL_037245_st	ENC1	7.69673	8.24806	8.50134	8.69138	-1.46543	1.19192	1.35974	0.0021	0.1116	0.0095	0.0226922	0.33282	0.0663266
SNOWBALL_031109_st		2.56859	3.11927	3.31394	3.24557	-1.46478	1.14446	1.09149	0.0054	0.2718	0.471	0.0446248	0.550684	0.726427
SNOWBALL_027287_st		2.11973	2.66911	2.90914	2.8013	-1.46346	1.18101	1.09595	0.0048	0.1718	0.4424	0.0411298	0.427382	0.704898
SNOWBALL_032675_st	PCDH18	4.89245	5.44052	6.00998	6.27009	-1.46212	1.48397	1.77715	0.0039	0.0029	0.0001	0.0354756	0.0289941	0.00253037
SNOWBALL_044105_st	PDE1A	3.68766	4.23494	4.37578	4.18053	-1.46133	1.10254	-1.03844	0.0011	0.3216	0.6979	0.0141325	0.601114	0.867787
SNOWBALL_044905_st	TNIK	4.57029	5.11617	5.54885	5.80096	-1.45991	1.34974	1.60747	0.0013	0.0071	0.0002	0.0161585	0.0545654	0.00356865
SNOWBALL_036206_st	GADD45A	4.78837	5.33422	5.63235	6.19506	-1.45988	1.22955	1.8161	0.0014	0.0518	< 0.001	0.0171919	0.207244	0.000628808
SNOWBALL_015844_st	EIF4A2	8.89462	9.43936	9.80726	9.96665	-1.45875	1.29047	1.44122	< 0.001	0.0006	< 0.001	0.000466185	0.00936193	0.000614026
SNOWBALL_032993_st	MTSS1,LOC106509968	5.09173	5.63535	5.721	6.06501	-1.45763	1.06116	1.34692	0.0004	0.4957	0.003	0.00711445	0.744088	0.0293268
SNOWBALL_042543_st	GADD45A	7.81836	8.36184	8.47156	8.51541	-1.45748	1.07902	1.11232	< 0.001	0.1983	0.0787	0.000285007	0.463245	0.269204
SNOWBALL_035197_st	SEMA3D	6.0182	6.55971	6.20336	6.00989	-1.45549	-1.28018	-1.4639	0.0014	0.0224	0.0013	0.0173572	0.119376	0.0158727
SNOWBALL_028257_st	BHLHE40	6.93521	7.47583	8.01616	8.06075	-1.45459	1.45431	1.49996	0.0011	0.0011	0.0005	0.0139914	0.014033	0.00850926
SNOWBALL_029042_st		3.4443	3.98327	4.32165	4.45692	-1.45293	1.26433	1.38862	0.0055	0.0613	0.0124	0.0454884	0.230571	0.0798612
SNOWBALL_028286_st		3.43819	3.97565	4.4738	4.82158	-1.45141	1.41241	1.79743	0.0011	0.0021	< 0.001	0.0144335	0.0225022	0.000500472
SNOWBALL_000870_st	LOC100737436	5.89706	6.43365	6.86724	6.93199	-1.45054	1.3506	1.41259	< 0.001	0.0003	< 0.001	0.000953503	0.00491121	0.00172997
SNOWBALL_013804_st	RGCC	5.38125	5.91769	6.18648	6.31384	-1.4504	1.20479	1.31599	0.0047	0.1192	0.0274	0.0404544	0.34594	0.136872
SNOWBALL_025350_st	ZCCHC24	6.70748	7.24254	7.68806	7.76038	-1.449	1.3618	1.4318	< 0.001	< 0.001	< 0.001	3.28854e-05	0.000181894	4.4929e-05
SNOWBALL_035298_st		2.40404	2.93771	2.63608	2.6511	-1.4476	-1.23254	-1.21977	0.0025	0.06	0.0724	0.0258042	0.227482	0.25597
SNOWBALL_017987_s_st	ACSL3	6.14608	6.67812	6.9555	6.9583	-1.44597	1.21199	1.21435	< 0.001	0.006	0.0056	0.000619585	0.048107	0.0458702
SNOWBALL_023217_st	FABP4	3.50246	4.03011	4.58937	4.40899	-1.44158	1.47351	1.30033	0.0029	0.0018	0.0226	0.028544	0.0207094	0.119958
SNOWBALL_011383_st	LIMCH1,LOC110262081	7.01778	7.54539	7.73497	7.69649	-1.44154	1.14043	1.11042	< 0.001	0.0004	0.0024	6.5327e-07	0.00629522	0.0254546
SNOWBALL_008673_st	FHOD3	6.29458	6.82164	7.12848	7.15692	-1.44098	1.237	1.26162	< 0.001	0.0073	0.004	0.00197313	0.0554437	0.0364237
SNOWBALL_036521_st	TMEM200A	5.23219	5.75718	5.97075	5.88441	-1.43893	1.15956	1.09219	0.0008	0.1115	0.3306	0.0109782	0.332634	0.609523
SNOWBALL_019908_st	SCRN1	7.73295	8.25784	8.39391	8.24751	-1.43883	1.0989	-1.00719	< 0.001	0.1327	0.9057	0.000592406	0.368437	0.963854
SNOWBALL_036837_st	WISP1	5.01789	5.54267	6.01053	6.21621	-1.43871	1.38306	1.59499	0.0025	0.0056	0.0003	0.0256011	0.0460746	0.0054093
SNOWBALL_004072_st	RUSC2	6.50088	7.0248	7.23149	7.19552	-1.43785	1.15403	1.12562	< 0.001	0.0135	0.0358	0.000171342	0.0847706	0.163392
SNOWBALL_009930_st	PTK7	6.77613	7.29636	7.33531	7.2579	-1.43418	1.02737	-1.02702	< 0.001	0.519	0.5242	2.07179e-05	0.760328	0.764
SNOWBALL_005438_st		3.01867	3.53829	3.50577	3.23446	-1.43358	-1.02279	-1.23441	0.0009	0.8014	0.0295	0.0119227	0.918538	0.143787
SNOWBALL_012601_st	CYP51	6.9005	7.41912	7.77875	7.63556	-1.43259	1.2831	1.16186	0.0054	0.0403	0.198	0.044699	0.176449	0.462842
SNOWBALL_037798_st	LRP1	9.12234	9.64022	9.94249	10.0737	-1.43185	1.23308	1.35051	< 0.001	0.0001	< 0.001	2.13846e-05	0.00246164	0.000114494
SNOWBALL_047236_st	TRIB3	6.33319	6.85072	7.55106	7.77181	-1.4315	1.62489	1.89355	0.0029	0.0002	< 0.001	0.0286625	0.0043135	0.000489124
SNOWBALL_035254_st		8.46468	8.9804	9.7581	10.316	-1.42971	1.71439	2.52386	0.0057	0.0002	< 0.001	0.0467787	0.00397682	3.8605e-05
SNOWBALL_008901_st	ZBTB48	4.53601	5.05059	5.14658	5.13988	-1.42858	1.0688	1.06384	0.0005	0.4325	0.4647	0.00837965	0.697041	0.721886
SNOWBALL_034716_st		5.63039	6.14365	6.61643	6.49511	-1.42727	1.38778	1.27585	< 0.001	< 0.001	0.0003	0.000253207	0.000518398	0.00531636
SNOWBALL_024541_st	C14H1orf198	8.02443	8.53698	8.76202	8.63904	-1.42658	1.16881	1.0733	< 0.001	0.0131	0.2238	0.00042183	0.0829071	0.495384
SNOWBALL_029235_st	FBXL20	6.42266	6.93429	7.24833	7.19189	-1.42566	1.24318	1.19548	0.0005	0.0161	0.0423	0.0075847	0.0955556	0.182066
SNOWBALL_019057_s_st	CST3	8.10192	8.61327	8.88902	9.02182	-1.42539	1.21062	1.32734	< 0.001	0.0024	< 0.001	0.000272166	0.024948	0.00179374
SNOWBALL_038047_st	PRCP,RAB30	4.52019	5.03113	5.60693	5.74762	-1.42497	1.49051	1.64318	0.0027	0.0011	0.0001	0.0274071	0.0137711	0.00311375
SNOWBALL_024691_s_st	FAM25A	5.60536	6.11611	6.15403	6.48805	-1.42479	1.02663	1.29409	0.0055	0.8148	0.0328	0.0453729	0.924577	0.154417
SNOWBALL_001111_s_st	FLOT1	7.58657	8.09707	8.07796	8.11971	-1.42454	-1.01333	1.01582	0.0001	0.8539	0.8272	0.00295886	0.942089	0.930303
SNOWBALL_018507_st	GPC1	6.82803	7.33832	7.42645	7.35684	-1.42434	1.06299	1.01292	< 0.001	0.1976	0.7812	6.754e-05	0.46237	0.908785
SNOWBALL_023373_s_st	TLR3	3.92346	4.43116	4.90547	5.02339	-1.42179	1.38925	1.50757	0.0013	0.0022	0.0003	0.0161129	0.0238279	0.0059842
SNOWBALL_003265_s_st	ACTC1	6.56886	7.0759	7.46373	7.24414	-1.42113	1.30842	1.12369	0.0003	0.003	0.1489	0.00568416	0.0293896	0.393869
SNOWBALL_017186_s_st	C14H1orf198	7.60104	8.10697	8.12668	8.04448	-1.42003	1.01376	-1.04426	< 0.001	0.8028	0.4328	0.000340794	0.919048	0.697255
SNOWBALL_015458_st	PLOD2	9.34411	9.84974	10.4344	10.5316	-1.41974	1.49971	1.60415	< 0.001	< 0.001	< 0.001	0.00173234	0.000522676	0.00013299
SNOWBALL_033798_st	FAM46B	4.92914	5.43455	5.55062	5.36871	-1.41952	1.08378	-1.04669	0.0005	0.3335	0.5795	0.00806056	0.612158	0.799967
SNOWBALL_019088_st	JAG1	6.61909	7.12326	7.68485	7.74517	-1.41831	1.47589	1.53891	0.0005	0.0002	< 0.001	0.008435	0.00398568	0.00184321
SNOWBALL_026032_st	NDUFV3	7.72108	8.22224	8.43102	8.73962	-1.41536	1.15571	1.43135	0.0002	0.0575	0.0001	0.00337652	0.221413	0.00265992
SNOWBALL_036605_st	MSANTD2	2.02317	2.52355	2.31589	2.32393	-1.41459	-1.15481	-1.1484	0.0049	0.1949	0.2118	0.0420232	0.458929	0.480378
SNOWBALL_046627_st	CHSY3	5.433	5.93271	6.29126	6.53233	-1.41393	1.28214	1.51532	0.0006	0.0078	0.0001	0.00950357	0.0580776	0.00262262
SNOWBALL_017049_s_st	KCNMA1	6.01956	6.51655	6.66026	6.33085	-1.41126	1.10474	-1.13737	0.0017	0.2916	0.1779	0.0192915	0.571474	0.435788
SNOWBALL_011424_st	MSMO1	5.80272	6.29875	6.53459	6.33914	-1.41032	1.17759	1.02839	0.0009	0.0722	0.7459	0.0126083	0.255399	0.892013
SNOWBALL_008880_st	HSPG2	7.79194	8.28759	8.59796	8.79569	-1.40996	1.24003	1.42217	< 0.001	< 0.001	< 0.001	2.0377e-05	0.00137041	1.591e-05
SNOWBALL_013544_st	THNSL1	3.71791	4.21301	4.85804	5.02667	-1.40941	1.56377	1.75767	0.0003	< 0.001	< 0.001	0.0057088	0.00074323	9.43269e-05
SNOWBALL_005581_st	WISP1	7.60499	8.09974	8.1508	8.1864	-1.40908	1.03603	1.06191	0.0001	0.6053	0.3842	0.00251856	0.815756	0.657268
SNOWBALL_021611_s_st	MXRA7	6.40121	6.89544	7.21171	7.24011	-1.40858	1.2451	1.26985	0.0007	0.017	0.0104	0.01062	0.0990815	0.070723
SNOWBALL_016749_s_st	SPPL3	6.77717	7.26965	7.23157	7.31709	-1.40686	-1.02675	1.03343	0.0015	0.7722	0.7185	0.0182092	0.904441	0.878198
SNOWBALL_030637_st	TMEM245	7.42675	7.91696	8.13382	8.27206	-1.40465	1.1622	1.27907	< 0.001	0.0062	< 0.001	0.000152744	0.0492729	0.0023345
SNOWBALL_036491_st	LIMK1,LOC106509663	6.03172	6.52101	6.89731	7.09834	-1.40375	1.29801	1.49208	0.0002	0.0018	< 0.001	0.00376997	0.02077	0.00104349
SNOWBALL_006097_st	THBS3	7.27508	7.76387	7.38582	6.85844	-1.40327	-1.29958	-1.8731	0.0004	0.0031	< 0.001	0.00633614	0.0300741	3.51959e-05
SNOWBALL_012430_st	NCAM1	7.88536	8.37196	8.75633	8.77039	-1.40114	1.30529	1.31807	0.0007	0.0045	0.0035	0.0103034	0.0393464	0.0327618
SNOWBALL_035003_st	DACT1	4.35088	4.83417	5.41306	5.27421	-1.39793	1.4937	1.35665	0.0011	0.0002	0.0023	0.0139867	0.00420289	0.0241522
SNOWBALL_038915_st		3.77764	4.25953	4.64555	4.83676	-1.39658	1.30678	1.49198	0.0001	0.001	< 0.001	0.00281397	0.0129409	0.000663297
SNOWBALL_002196_st	CTGF	9.5911	10.0725	10.245	10.3669	-1.39608	1.12701	1.22641	< 0.001	0.0697	0.0044	0.00158523	0.250052	0.0385253
SNOWBALL_031697_st	HLTF	2.44548	2.92667	2.99573	3.13698	-1.39589	1.04904	1.15694	0.0003	0.5231	0.0642	0.0058782	0.763252	0.237459
SNOWBALL_007994_st	ADGRG1	5.94544	6.42657	6.63508	6.3746	-1.39583	1.1555	-1.03668	0.0004	0.0699	0.6349	0.00652109	0.250453	0.83304
SNOWBALL_042534_st	TOX	4.38345	4.86451	4.94457	4.88452	-1.39576	1.05706	1.01397	0.0013	0.5264	0.8734	0.0160706	0.765451	0.950448
SNOWBALL_044383_st		3.21707	3.69721	3.86156	3.69033	-1.39488	1.12066	-1.00478	0.0001	0.1045	0.9434	0.00284001	0.319924	0.978852
SNOWBALL_027895_st	CSF1	6.80186	7.28164	7.4425	7.39699	-1.39453	1.11796	1.08324	0.0005	0.1663	0.3138	0.0082601	0.419411	0.593586
SNOWBALL_002898_st	CYB5A	6.84996	7.32928	7.52939	7.58569	-1.39409	1.14878	1.1945	< 0.001	0.0114	0.0021	0.000220724	0.0755526	0.0228565
SNOWBALL_029090_st	P4HA2	7.73375	8.21278	8.8067	9.24979	-1.3938	1.50935	2.05198	< 0.001	< 0.001	< 0.001	0.000506437	7.31615e-05	3.27728e-07
SNOWBALL_012382_st	CRYAB	7.52365	8.00207	8.50836	8.64234	-1.39322	1.42039	1.55862	0.0019	0.0012	0.0001	0.0213144	0.0153199	0.00314668
SNOWBALL_042573_st		4.08452	4.5626	4.58403	4.41362	-1.39289	1.01496	-1.10879	0.0005	0.8479	0.1941	0.00797128	0.939507	0.457868
SNOWBALL_035014_st	PLOD2	8.28718	8.76439	9.41499	9.52964	-1.39205	1.56981	1.69966	0.0024	0.0002	< 0.001	0.0253142	0.003444	0.000971308
SNOWBALL_021540_s_st	FHOD3	5.15798	5.63366	6.03647	6.16203	-1.39057	1.32208	1.4423	0.0003	0.0015	0.0001	0.00605828	0.017494	0.00282644
SNOWBALL_030992_st	SYNJ2BP	5.68875	6.1638	6.55473	6.61092	-1.38997	1.31123	1.36332	0.0002	0.001	0.0003	0.00364712	0.0135552	0.00562591
SNOWBALL_015180_st	RFTN1	5.88212	6.35537	6.94648	6.94993	-1.38823	1.50641	1.51001	0.0013	0.0002	0.0002	0.0158624	0.00360352	0.00344527
SNOWBALL_003395_st	PRUNE2	8.38094	8.85276	9.19776	9.04435	-1.38686	1.27015	1.14202	0.0006	0.0068	0.1036	0.00927673	0.0524983	0.318224
SNOWBALL_012261_st	SYTL2	9.20141	9.67129	9.84147	9.85699	-1.385	1.1252	1.13737	< 0.001	0.0272	0.0174	0.000261562	0.13587	0.100518
SNOWBALL_025423_s_st	BNIP3	8.33219	8.80113	9.49824	9.4884	-1.38409	1.62125	1.61023	< 0.001	< 0.001	< 0.001	0.00173288	5.38495e-05	6.1537e-05
SNOWBALL_033079_st		3.51432	3.98139	3.92693	3.78353	-1.38229	-1.03847	-1.14699	0.0013	0.6571	0.1198	0.0163627	0.845631	0.346886
SNOWBALL_003859_st	COL15A1	9.35025	9.81702	10.1768	10.0926	-1.38202	1.28326	1.21048	0.0003	0.0028	0.0155	0.00554652	0.0276714	0.0931213
SNOWBALL_017339_st	HTRA1	9.66824	10.1324	10.4178	10.5463	-1.37948	1.21879	1.33233	< 0.001	0.0014	< 0.001	0.000475216	0.0169346	0.00123965
SNOWBALL_000819_st		2.57647	3.04026	3.3628	3.5056	-1.37916	1.25053	1.38065	0.0024	0.0236	0.0024	0.0251678	0.123522	0.0247182
SNOWBALL_001114_s_st	FLOT1	6.75767	7.21996	7.36208	7.30432	-1.37773	1.10353	1.06022	0.0048	0.3294	0.5587	0.0412272	0.608439	0.786654
SNOWBALL_047668_st	ITGA8	9.08647	9.54806	9.64958	9.40119	-1.37706	1.0729	-1.10716	0.0003	0.3316	0.1667	0.00583675	0.610413	0.420093
SNOWBALL_028371_st	FBXL20	6.02489	6.48218	6.72299	6.67096	-1.37296	1.18166	1.1398	0.0051	0.1073	0.1997	0.0432734	0.325159	0.465203
SNOWBALL_045550_st	TMEM245	4.68881	5.14533	5.46663	5.49727	-1.37224	1.24945	1.27627	0.002	0.0195	0.0117	0.021863	0.108656	0.0769658
SNOWBALL_018193_s_st	ACSL3	5.91669	6.37306	6.7774	6.511	-1.37208	1.32349	1.10033	0.0059	0.0125	0.3516	0.0477049	0.0804559	0.628818
SNOWBALL_016915_st	TMEM26	7.52754	7.9823	8.21793	8.2905	-1.37055	1.17742	1.23817	0.0002	0.0226	0.0045	0.00360528	0.119952	0.0395223
SNOWBALL_005882_st	TOX	7.9139	8.3685	8.35416	8.04647	-1.37041	-1.00999	-1.25009	0.0006	0.8955	0.0085	0.00956387	0.959628	0.0617818
SNOWBALL_026210_st	PTPRF	6.23667	6.68791	7.19086	7.29197	-1.36722	1.41711	1.51999	< 0.001	< 0.001	< 0.001	0.00101171	0.000403016	7.70417e-05
SNOWBALL_017757_st	SORBS2	6.47664	6.92786	6.84813	6.60977	-1.3672	-1.05682	-1.24668	0.0033	0.5503	0.027	0.0313806	0.781266	0.135348
SNOWBALL_028504_st		5.86366	6.31371	6.57989	6.54772	-1.36608	1.20263	1.1761	< 0.001	0.0074	0.016	0.0022736	0.0560689	0.0951889
SNOWBALL_013801_st	NHLRC3	5.56038	6.00927	6.17006	6.10589	-1.36498	1.1179	1.06927	0.0042	0.2493	0.4829	0.0373858	0.525874	0.735054
SNOWBALL_015094_st	SERPINF1	7.68569	8.13416	8.61223	8.74886	-1.36459	1.39288	1.53124	0.0024	0.0015	0.0001	0.0250943	0.0174457	0.00326727
SNOWBALL_024971_st	INPP5A	5.78477	6.2318	6.63713	6.63961	-1.36323	1.3244	1.32667	0.002	0.0041	0.0039	0.0218753	0.0369757	0.0358818
SNOWBALL_017086_s_st	PLCE1	4.37699	4.82239	5.47596	5.50727	-1.36169	1.57306	1.60757	0.0018	< 0.001	< 0.001	0.0205743	0.00147983	0.00101072
SNOWBALL_028505_st	CA12	5.49214	5.9371	6.46448	6.67235	-1.36128	1.44131	1.66469	< 0.001	< 0.001	< 0.001	0.000370577	7.95887e-05	3.24741e-06
SNOWBALL_041543_st		3.83198	4.27567	4.20818	3.99794	-1.36008	-1.04789	-1.21228	0.0034	0.6091	0.0475	0.0325477	0.818069	0.196149
SNOWBALL_017243_st	FAM149B1	4.83733	5.27716	5.61232	5.81492	-1.35645	1.26152	1.45171	0.0032	0.0178	0.0006	0.0308452	0.102441	0.00950335
SNOWBALL_030121_st	HEATR5A	4.53044	4.96997	5.22985	5.12095	-1.35616	1.19739	1.11032	0.0063	0.0817	0.2965	0.0499646	0.275511	0.576481
SNOWBALL_000527_s_st	PMEPA1	6.2801	6.71763	7.10239	7.12854	-1.35428	1.30564	1.32952	0.004	0.0094	0.0061	0.0362671	0.0657977	0.049125
SNOWBALL_014260_st	TTYH2	7.08756	7.52463	7.64424	7.62393	-1.35385	1.08644	1.07125	< 0.001	0.0874	0.1502	0.000283112	0.287191	0.395756
SNOWBALL_027558_st	PRUNE2	7.68818	8.12502	8.49895	8.36198	-1.35364	1.29587	1.17851	0.0019	0.0059	0.0613	0.0212019	0.0476166	0.230738
SNOWBALL_014754_st	ENO3	7.23442	7.67075	7.48199	7.65242	-1.35316	-1.13978	-1.01279	0.0028	0.1474	0.8843	0.0283444	0.391655	0.954924
SNOWBALL_005602_st	FBXO32	7.40312	7.83759	7.68837	7.65504	-1.35142	-1.10897	-1.13489	0.0056	0.2878	0.1973	0.04578	0.567507	0.461925
SNOWBALL_011666_st	SYNPO2	6.7503	7.18235	7.54265	7.64924	-1.34914	1.2837	1.38213	< 0.001	0.0002	< 0.001	0.00114879	0.00461464	0.000600508
SNOWBALL_018465_st	RAMP1	6.36538	6.79638	7.19728	7.23338	-1.34817	1.32033	1.35378	0.0003	0.0006	0.0003	0.00581888	0.00947037	0.00528086
SNOWBALL_021717_s_st	ESYT2	5.4148	5.84577	6.05397	6.269	-1.34814	1.15525	1.34092	0.0002	0.0352	0.0003	0.00424265	0.161582	0.00484347
SNOWBALL_010821_st	SLCO3A1	6.04843	6.4782	6.66385	6.39312	-1.34702	1.13733	-1.06075	0.0002	0.0581	0.3634	0.0044955	0.222837	0.639298
SNOWBALL_003534_st	GCNT1	6.20667	6.63632	6.9233	6.83319	-1.3469	1.22009	1.14621	0.0004	0.0095	0.0604	0.00727771	0.0665543	0.228443
SNOWBALL_011391_s_st	PCDH7	7.57959	8.00914	8.20142	8.28142	-1.34681	1.14257	1.20771	< 0.001	0.0146	0.0013	0.000587487	0.0893074	0.0164192
SNOWBALL_002151_st	UST	7.72477	8.1543	8.50324	8.52608	-1.3468	1.27362	1.29395	0.0005	0.0029	0.0018	0.00830906	0.0286882	0.020214
SNOWBALL_047841_st	PKDCC	2.91734	3.34655	3.54601	3.74935	-1.34649	1.14827	1.32208	0.0006	0.0646	0.001	0.00899886	0.238459	0.0134332
SNOWBALL_011702_st	PCDH18	8.42473	8.85277	9.11613	9.34623	-1.34541	1.20027	1.40781	< 0.001	0.0055	< 0.001	0.00215599	0.0454065	0.000682808
SNOWBALL_006489_st	OXR1	3.51231	3.93977	3.66285	3.71399	-1.34486	-1.21161	-1.16941	0.0003	0.0094	0.0286	0.00583452	0.0660916	0.14076
SNOWBALL_042523_st	HMGCS1	2.71874	3.14434	3.10627	2.99589	-1.34313	-1.02674	-1.10838	0.0001	0.6632	0.1029	0.00314741	0.848896	0.316924
SNOWBALL_047802_st	KIF1B	5.1243	5.5497	5.82969	5.92254	-1.34294	1.21418	1.2949	0.0046	0.046	0.0109	0.040352	0.192015	0.073003
SNOWBALL_032922_st		4.73092	5.15363	5.59239	5.50371	-1.34044	1.35544	1.27463	0.0012	0.0009	0.0051	0.0154271	0.0122934	0.0430056
SNOWBALL_039668_st	KCNE4	5.72809	6.14874	6.46909	6.36937	-1.33853	1.24863	1.16524	0.0013	0.0094	0.0589	0.0164011	0.0657837	0.224822
SNOWBALL_026982_st	C5H12orf45	6.88134	7.30139	7.55918	7.76002	-1.33798	1.19565	1.37423	0.0004	0.0151	0.0002	0.00700218	0.0913241	0.00376372
SNOWBALL_042331_st		6.52201	6.94045	7.4228	7.56399	-1.33648	1.39702	1.54065	0.0026	0.0008	< 0.001	0.0263432	0.0114628	0.00185415
SNOWBALL_047203_st	DAB2	3.08894	3.50689	3.91219	4.09325	-1.33602	1.32436	1.50145	0.0019	0.0024	< 0.001	0.0209266	0.0248666	0.00214531
SNOWBALL_009629_st	ZNF184	5.17995	5.59761	5.73368	5.71516	-1.33576	1.09891	1.08489	0.0003	0.1597	0.2208	0.00607816	0.410008	0.491797
SNOWBALL_011406_st	PCDH7	6.93163	7.34824	7.49661	7.70796	-1.33479	1.10831	1.28317	0.0002	0.1082	0.0008	0.00414218	0.326661	0.0112325
SNOWBALL_001650_st	NHS	4.36919	4.78559	5.14923	5.03899	-1.33459	1.28667	1.19202	0.0018	0.005	0.0375	0.0206469	0.0423439	0.168483
SNOWBALL_012880_st	HMCN1	7.04363	7.45998	7.38729	7.24209	-1.33455	-1.05168	-1.16303	< 0.001	0.3101	0.0063	0.000688865	0.590106	0.0499646
SNOWBALL_025444_s_st	TIMP2	7.96069	8.37497	8.81218	8.84829	-1.33264	1.35398	1.3883	0.0005	0.0003	0.0002	0.00839466	0.00582524	0.00328398
SNOWBALL_011428_st	NAAA	4.24041	4.65419	4.99964	4.96058	-1.33218	1.27055	1.23661	0.0004	0.0018	0.0044	0.00665366	0.0205249	0.0390373
SNOWBALL_003807_st	TBC1D2	3.57271	3.98622	4.17766	4.37423	-1.33191	1.1419	1.30859	0.0059	0.1613	0.0089	0.0478373	0.412329	0.0636148
SNOWBALL_035718_st	SEMA3D	4.38938	4.80263	4.78785	4.36569	-1.33168	-1.01029	-1.35373	0.0011	0.8887	0.0007	0.0140918	0.956768	0.00996523
SNOWBALL_036842_st	STK17B	4.73679	5.15003	5.33868	5.18721	-1.33167	1.1397	1.02611	< 0.001	0.0203	0.6184	0.00114879	0.111573	0.823696
SNOWBALL_023004_s_st	SMARCA1	5.68996	6.1027	6.59913	6.7574	-1.33121	1.41072	1.57429	0.0046	0.0011	< 0.001	0.0399233	0.014397	0.00211884
SNOWBALL_025633_s_st	TIMP2	8.81064	9.22225	9.58465	9.70615	-1.33017	1.28557	1.39852	0.0005	0.0015	0.0001	0.00785797	0.0174278	0.00246114
SNOWBALL_023363_st	GDF9	4.63792	5.04866	5.486	5.81143	-1.32937	1.35411	1.69675	0.0003	0.0001	< 0.001	0.00497435	0.0031417	2.46714e-05
SNOWBALL_035743_st	LOXL2	9.58027	9.98854	10.2743	10.0995	-1.32709	1.21904	1.07997	0.0002	0.0037	0.2064	0.00375148	0.0345328	0.473828
SNOWBALL_022498_s_st	ECH1	5.8058	6.21375	6.29376	6.44791	-1.3268	1.05702	1.17623	0.0031	0.5052	0.0633	0.0302767	0.750826	0.235451
SNOWBALL_003053_s_st	KLF13	6.36241	6.77004	6.69403	6.64766	-1.32651	-1.0541	-1.08853	< 0.001	0.3456	0.1372	0.00215862	0.623236	0.37564
SNOWBALL_019880_st	AASS	6.08193	6.48906	6.53482	6.08032	-1.32604	1.03223	-1.32752	0.0007	0.6454	0.0007	0.0104552	0.839041	0.0102026
SNOWBALL_002020_st	THBS2	9.13833	9.54542	9.60935	9.82465	-1.326	1.04531	1.21354	< 0.001	0.4306	0.0028	0.00237336	0.695539	0.0278019
SNOWBALL_036084_st	PPP2R2C	4.28549	4.69145	4.65853	4.82452	-1.32497	-1.02308	1.09662	0.0053	0.797	0.3061	0.0442219	0.916451	0.586067
SNOWBALL_017737_st	TENM3	6.45824	6.864	6.70562	6.40296	-1.32479	-1.11603	-1.37653	0.0002	0.0726	< 0.001	0.00331544	0.256301	0.00123608
SNOWBALL_004093_st	PRUNE2	7.27113	7.6767	8.09488	7.93186	-1.32461	1.33624	1.19347	0.0027	0.0021	0.0405	0.0273597	0.0231438	0.177048
SNOWBALL_007465_st	DCN	9.98291	10.3881	10.632	10.8229	-1.32423	1.18419	1.35175	< 0.001	0.0004	< 0.001	0.00010381	0.00663326	5.39457e-05
SNOWBALL_007126_st	LRP1	9.59443	9.99821	10.3296	10.4478	-1.32296	1.25819	1.36569	< 0.001	< 0.001	< 0.001	4.81084e-05	0.000294992	1.7057e-05
SNOWBALL_016005_s_st	TMEM45A	9.04891	9.45231	9.77151	9.80899	-1.32262	1.24764	1.28048	0.0007	0.0042	0.0018	0.00986756	0.0376971	0.0207643
SNOWBALL_019992_st	AEBP1	8.85106	9.2539	9.55496	9.52834	-1.32211	1.23205	1.20952	< 0.001	< 0.001	< 0.001	1.86827e-05	0.000281844	0.000628257
SNOWBALL_027302_st	PANK2	5.38067	5.7831	5.74236	5.64589	-1.32173	-1.02864	-1.09977	0.0003	0.644	0.1322	0.00501974	0.838188	0.367632
SNOWBALL_011707_st	PDE5A	7.7099	8.11224	8.20304	7.84413	-1.32165	1.06496	-1.20423	< 0.001	0.1079	0.0001	9.01252e-05	0.326294	0.00284001
SNOWBALL_011902_st	MAB21L2	7.32313	7.72517	8.28451	8.39482	-1.32137	1.4736	1.59069	0.0059	0.0004	< 0.001	0.0476139	0.00718741	0.00192953
SNOWBALL_032289_st	COL8A1	7.34492	7.74686	7.78501	7.66909	-1.32128	1.0268	-1.05538	0.0032	0.7467	0.5126	0.0309836	0.892423	0.755932
SNOWBALL_015707_st	LOC100514494	5.70878	6.11066	6.4502	6.39208	-1.32123	1.26536	1.2154	0.0049	0.014	0.0362	0.0416577	0.0866971	0.164473
SNOWBALL_034793_st	LOC100623720	8.85221	9.25377	9.40632	9.3816	-1.32093	1.11153	1.09265	< 0.001	0.0082	0.0224	5.5931e-05	0.060019	0.119291
SNOWBALL_021467_s_st	ACAT1	8.34767	8.74815	9.03585	9.16514	-1.31994	1.22069	1.33514	0.0003	0.0049	0.0002	0.00591023	0.0416993	0.00444989
SNOWBALL_013640_st	CELF2	7.18147	7.58148	8.01589	7.90725	-1.31951	1.35136	1.25334	0.0012	0.0006	0.0055	0.0150153	0.00896358	0.0455987
SNOWBALL_034482_st		3.98771	4.38771	4.52409	4.50301	-1.31951	1.09914	1.0832	0.0023	0.2339	0.3111	0.0240102	0.507665	0.591121
SNOWBALL_024803_s_st	TCF7L2	6.31367	6.7133	6.91219	6.79339	-1.31917	1.14782	1.05709	< 0.001	0.0175	0.3018	0.00183347	0.101047	0.581937
SNOWBALL_017874_st	SCRN3	5.99695	6.39572	6.90673	7.10016	-1.31838	1.42505	1.62952	0.0022	0.0003	< 0.001	0.023546	0.00491698	0.00038005
SNOWBALL_016931_st	PRKG1	6.8888	7.2863	7.54667	7.43174	-1.31722	1.19779	1.10607	0.001	0.0178	0.1596	0.0129553	0.102219	0.409874
SNOWBALL_017178_s_st	ZNF25	3.98848	4.3858	4.73738	4.73862	-1.31707	1.27595	1.27705	0.0009	0.0024	0.0023	0.0121114	0.0248332	0.0243643
SNOWBALL_023103_s_st	ACSL3	5.83732	6.23449	6.54894	6.34544	-1.31692	1.24354	1.07994	0.0023	0.011	0.3259	0.0240178	0.073843	0.605107
SNOWBALL_018195_st	STK17B	7.29697	7.69371	7.68382	7.5118	-1.31652	-1.00688	-1.13439	< 0.001	0.8988	0.0302	0.00224582	0.961037	0.1461
SNOWBALL_001678_s_st		7.27799	7.6743	7.93636	7.81259	-1.31614	1.19919	1.10059	< 0.001	0.0001	0.0179	8.86595e-05	0.00296556	0.102679
SNOWBALL_017765_s_st	SORBS2	2.80407	3.20018	3.38719	3.24321	-1.31596	1.1384	1.03028	0.0042	0.1345	0.7215	0.03729	0.371218	0.879683
SNOWBALL_000939_st	FGD4	5.52339	5.91938	6.11325	5.69486	-1.31585	1.14382	-1.16839	0.0028	0.1028	0.0623	0.0276894	0.316748	0.2329
SNOWBALL_021175_st	DNAJC5,LOC110257381	7.72717	8.12284	8.21394	8.16346	-1.31556	1.06518	1.02856	0.0001	0.2589	0.6088	0.00261083	0.536534	0.817897
SNOWBALL_006273_st	SORT1	8.72783	9.12238	9.39341	9.32579	-1.31452	1.20668	1.15142	< 0.001	0.0001	0.0017	0.00012224	0.00289641	0.0195325
SNOWBALL_003111_st	MLANA	5.50366	5.89712	5.67763	5.26076	-1.31354	-1.16432	-1.5544	0.0028	0.0668	< 0.001	0.0280456	0.243456	0.00105592
SNOWBALL_006659_s_st	PLEKHO1	7.65947	8.05195	8.11454	7.88086	-1.31265	1.04433	-1.12591	0.0033	0.5895	0.1517	0.0313655	0.806044	0.398112
SNOWBALL_008045_st	PEPD	6.66883	7.06015	7.12627	7.26475	-1.31159	1.0469	1.15237	< 0.001	0.2304	0.0014	0.000110784	0.503475	0.0169155
SNOWBALL_017257_s_st	P4HA1	9.00034	9.39161	9.86165	10.1058	-1.31154	1.38515	1.64055	0.0002	< 0.001	< 0.001	0.00460128	0.00112663	2.62346e-05
SNOWBALL_014391_st	MRC2	7.09147	7.48182	7.6163	7.79721	-1.31071	1.0977	1.24435	< 0.001	0.0357	< 0.001	0.00028222	0.163228	0.00169765
SNOWBALL_017242_st	INPP5A	6.92579	7.31476	7.49286	7.51981	-1.30946	1.13139	1.15273	< 0.001	0.0253	0.0118	0.00167481	0.129666	0.0774632
SNOWBALL_033483_st	STAU2	5.32635	5.71305	5.93793	5.95684	-1.3074	1.16868	1.18409	0.0059	0.0839	0.0629	0.0479703	0.280022	0.234518
SNOWBALL_027428_st	TNS1	6.51847	6.90435	7.21061	7.19235	-1.30666	1.2365	1.22095	0.0039	0.0165	0.0228	0.0354218	0.0971474	0.120892
SNOWBALL_021856_st	SPON2	7.99417	8.37992	8.56437	8.61682	-1.30654	1.13638	1.17846	< 0.001	0.0124	0.0023	0.000807108	0.0798085	0.0243674
SNOWBALL_002725_st	FOCAD	6.66393	7.04909	7.05136	7.30476	-1.306	1.00158	1.19388	0.0001	0.977	0.0046	0.00315844	0.99127	0.0401508
SNOWBALL_037856_st	ADAMTS10	6.18213	6.56697	6.73877	6.8739	-1.30571	1.12646	1.23708	< 0.001	0.0062	< 0.001	0.000168633	0.0496818	0.00119072
SNOWBALL_035203_st	ROR2	6.21385	6.59603	6.63919	6.81254	-1.30331	1.03036	1.16192	< 0.001	0.5446	0.0068	0.00146199	0.777624	0.0526931
SNOWBALL_032365_st		5.28355	5.66529	5.68741	5.70744	-1.30291	1.01545	1.02965	0.001	0.82	0.6652	0.013746	0.926981	0.850011
SNOWBALL_033025_st	SOS2	6.2565	6.63802	6.73283	6.81687	-1.30272	1.06792	1.13198	0.0002	0.2458	0.0372	0.00372936	0.521759	0.167552
SNOWBALL_026416_st	SELENOM	7.9197	8.30099	8.51244	8.17714	-1.3025	1.15786	-1.08963	0.0029	0.0693	0.2709	0.0286882	0.249015	0.549709
SNOWBALL_020496_st	SMARCA1	5.53086	5.91129	6.42332	6.48327	-1.30172	1.42606	1.48656	0.002	0.0001	< 0.001	0.0222065	0.00318287	0.00135702
SNOWBALL_027592_st	LPP	9.47007	9.84891	10.0533	9.98827	-1.3003	1.15219	1.10141	0.0005	0.0328	0.1306	0.00818896	0.154227	0.36505
SNOWBALL_015149_s_st	CHD3	6.93808	7.31622	7.39498	7.42656	-1.29966	1.05611	1.07948	< 0.001	0.1396	0.0447	9.92384e-05	0.379541	0.18872
SNOWBALL_014441_st	DHRS11,MRM1	6.81973	7.19629	7.53003	7.53861	-1.29824	1.26027	1.26779	0.0025	0.0059	0.0049	0.0256851	0.047518	0.0421182
SNOWBALL_023733_st	TRIB3	5.43605	5.81206	6.09985	6.1035	-1.29774	1.22078	1.22386	0.0057	0.0267	0.0251	0.046699	0.134301	0.128865
SNOWBALL_018105_st	NRP2	5.25771	5.63362	5.50339	5.48016	-1.29766	-1.09447	-1.11223	< 0.001	0.0072	0.0023	1.89919e-05	0.0547032	0.0239908
SNOWBALL_044892_s_st	LPP	10.0532	10.4271	10.5121	10.4018	-1.29592	1.06068	-1.01774	< 0.001	0.1219	0.6325	0.000140826	0.350502	0.831757
SNOWBALL_037433_st	TMEM245	7.65841	8.0322	8.20973	8.3075	-1.29576	1.13094	1.21024	0.0001	0.0298	0.0019	0.00286796	0.144734	0.0215551
SNOWBALL_019798_st	MTURN	8.10076	8.47388	8.61698	8.38855	-1.29515	1.10428	-1.06093	0.0014	0.1582	0.3904	0.0168408	0.407822	0.66264
SNOWBALL_025015_s_st	HTRA1	8.92026	9.29285	9.51785	9.59623	-1.29467	1.16878	1.23403	< 0.001	0.0008	< 0.001	0.000228989	0.011407	0.00132186
SNOWBALL_016732_s_st	HECTD4	6.30663	6.67855	6.90848	7.05398	-1.29408	1.17277	1.29723	0.0006	0.0176	0.0005	0.00886757	0.101538	0.00833496
SNOWBALL_031013_st	PAFAH2	5.83332	6.20451	6.20606	6.30778	-1.29341	1.00108	1.07421	0.0008	0.9864	0.2677	0.0112102	0.994883	0.54619
SNOWBALL_036903_st	HECTD4	7.05446	7.42499	7.60793	7.7235	-1.29283	1.13519	1.22987	< 0.001	0.0132	0.0003	0.00114678	0.0832582	0.00587353
SNOWBALL_047558_st	LHFPL2	3.87431	4.24394	4.62026	4.88069	-1.29202	1.29803	1.55483	0.003	0.0026	< 0.001	0.0294438	0.0267253	0.000672415
SNOWBALL_037541_st	LPP	7.82296	8.19244	8.40148	8.37247	-1.29188	1.15592	1.13291	0.0037	0.0728	0.1176	0.0343157	0.256811	0.34321
SNOWBALL_014723_st	FBXL20	5.5693	5.93805	6.18936	6.13624	-1.29123	1.19029	1.14726	0.0005	0.0088	0.0317	0.00762141	0.062912	0.150799
SNOWBALL_002283_st	TMEM200A	8.8295	9.19798	9.39803	9.29017	-1.291	1.14874	1.06599	< 0.001	0.0068	0.1714	0.00102659	0.0525445	0.426728
SNOWBALL_005951_st	FAM78B	6.55376	6.9218	6.99599	6.77838	-1.2906	1.05277	-1.10452	< 0.001	0.2018	0.0204	0.000301841	0.467843	0.112136
SNOWBALL_034349_st	PTTG1IP	6.78775	7.15559	7.4299	7.28639	-1.29042	1.20941	1.0949	0.0007	0.0063	0.1538	0.00987589	0.0501196	0.401328
SNOWBALL_032825_st		4.04817	4.41571	4.55345	4.62344	-1.29015	1.10018	1.15487	0.0062	0.2556	0.0944	0.0496626	0.532862	0.301137
SNOWBALL_035788_st	UGGT2	3.67243	4.03964	4.13532	4.21324	-1.28986	1.06857	1.12786	0.0032	0.3795	0.1206	0.0306328	0.653439	0.348237
SNOWBALL_032557_st	NRP2	5.01859	5.38522	5.77476	5.47257	-1.28934	1.30998	1.06242	0.0007	0.0004	0.3315	0.00997046	0.00667561	0.610291
SNOWBALL_013463_st	COMMD3	7.29601	7.6626	7.86596	8.11341	-1.28931	1.15138	1.3668	< 0.001	0.0027	< 0.001	0.000412373	0.0276561	6.31271e-05
SNOWBALL_033897_st		5.65567	6.0219	6.48761	6.39782	-1.28898	1.381	1.29766	0.0022	0.0003	0.0018	0.0237405	0.00524109	0.020475
SNOWBALL_047443_st	PDE5A	6.64186	7.00576	7.00795	6.70414	-1.2869	1.00151	-1.23253	0.0001	0.9767	0.0008	0.00318128	0.991151	0.0115933
SNOWBALL_000151_st	COL1A1	9.52094	9.88206	10.2264	10.4298	-1.28442	1.2696	1.46176	< 0.001	0.0001	< 0.001	0.00187719	0.00270076	4.90281e-05
SNOWBALL_014534_st	CHAD	5.13896	5.49998	5.49875	5.79788	-1.28434	-1.00085	1.22936	0.001	0.9892	0.0042	0.0128206	0.995922	0.037688
SNOWBALL_033898_st	NRP2	7.28762	7.64822	7.66342	7.51759	-1.28396	1.01059	-1.09477	< 0.001	0.8032	0.0447	0.000680524	0.9192	0.188736
SNOWBALL_002187_s_st	PLAGL1	5.9654	6.32574	6.83154	6.78942	-1.28372	1.41991	1.37906	0.0005	< 0.001	< 0.001	0.00802204	0.00060143	0.00124244
SNOWBALL_019859_s_st	JAZF1	6.20393	6.56382	6.82535	6.44188	-1.28332	1.19875	-1.0882	0.0032	0.0229	0.2578	0.0308927	0.121133	0.535307
SNOWBALL_028712_st	CXXC5	5.5702	5.92865	6.04755	6.12677	-1.28205	1.08591	1.1472	0.003	0.263	0.0711	0.0293224	0.541034	0.253156
SNOWBALL_003057_st	ZNF532	6.43176	6.78991	6.79519	6.64691	-1.28178	1.00367	-1.1042	0.0007	0.9517	0.1152	0.0104711	0.982025	0.339181
SNOWBALL_018811_st	ADAM19	7.38173	7.73774	7.79415	7.51385	-1.27989	1.03987	-1.16788	0.0003	0.484	0.0117	0.00612089	0.735813	0.0769503
SNOWBALL_025236_st	AGL	5.22039	5.57588	5.67122	5.63473	-1.27942	1.06832	1.04164	0.0015	0.3199	0.5353	0.0177109	0.599559	0.771472
SNOWBALL_028297_st	MCRIP1	5.67478	6.03016	5.9989	5.96867	-1.27932	-1.02191	-1.04354	0.002	0.7502	0.5332	0.0221307	0.894142	0.769983
SNOWBALL_022989_s_st	NCOA2	6.27505	6.62975	6.79284	7.11216	-1.27872	1.11968	1.39708	0.0027	0.1231	0.0002	0.0274502	0.352431	0.00392062
SNOWBALL_032769_st	ZFHX3	3.81592	4.1703	4.33956	4.42842	-1.27843	1.12448	1.19592	0.0048	0.1374	0.0298	0.0411006	0.375929	0.144696
SNOWBALL_021766_s_st	TIMP2	8.92952	9.28317	9.68044	9.71481	-1.27778	1.31702	1.34877	0.0001	< 0.001	< 0.001	0.00243413	0.000969381	0.000479804
SNOWBALL_025604_st	FOXN3	7.34187	7.69208	7.81499	7.85362	-1.27475	1.08892	1.11848	< 0.001	0.0877	0.0295	0.00225847	0.28785	0.143629
SNOWBALL_033092_st		6.02567	6.37581	6.96737	6.90961	-1.27469	1.50688	1.44773	0.0025	< 0.001	< 0.001	0.025532	0.000633608	0.00148405
SNOWBALL_021071_s_st	CSTB	8.54392	8.89376	9.12243	9.09123	-1.27442	1.17175	1.14668	< 0.001	0.0019	0.0056	0.00112165	0.0215026	0.0462112
SNOWBALL_002233_st	FAM135A	6.40095	6.75057	7.17502	7.36294	-1.27422	1.34206	1.52878	0.0018	0.0003	< 0.001	0.0203191	0.00597829	0.000327486
SNOWBALL_003651_st	TLN1	8.31424	8.66334	8.79084	8.62759	-1.27377	1.0924	-1.02509	< 0.001	0.0035	0.352	1.14469e-05	0.0330517	0.629154
SNOWBALL_035537_st	LRP1	9.19775	9.54626	9.92219	10.0447	-1.27325	1.29768	1.41272	0.0001	< 0.001	< 0.001	0.0030869	0.00173081	0.000154979
SNOWBALL_020036_s_st	TMSB4X	11.0712	11.4177	11.6013	11.6964	-1.27149	1.13572	1.21311	0.0001	0.018	0.001	0.00309269	0.103179	0.013626
SNOWBALL_028715_st		6.66806	7.01108	6.9503	7.02053	-1.26841	-1.04303	1.00657	< 0.001	0.2758	0.863	0.000415433	0.554932	0.946089
SNOWBALL_003411_st	ANGPTL2	8.82809	9.17105	9.28016	9.22208	-1.26835	1.07856	1.036	< 0.001	0.0727	0.3823	0.000655087	0.256666	0.65571
SNOWBALL_016589_s_st	PI4KA	8.39651	8.7392	8.91219	8.89108	-1.26812	1.1274	1.11102	< 0.001	0.0001	0.0004	6.09267e-06	0.00276806	0.00706384
SNOWBALL_035587_st	CRIM1	6.57506	6.91547	6.83639	6.98762	-1.26611	-1.05634	1.05128	0.0033	0.4345	0.4751	0.0314999	0.698662	0.729426
SNOWBALL_014735_s_st	CHD3	7.144	7.48385	7.65311	7.72444	-1.26563	1.12448	1.18147	< 0.001	0.0037	0.0002	0.000232255	0.0346266	0.00391309
SNOWBALL_010589_s_st	SLC7A7	5.61249	5.95164	5.99625	5.96226	-1.26502	1.0314	1.00739	0.0012	0.6128	0.9037	0.0152564	0.820265	0.963056
SNOWBALL_001530_s_st	GAB1	6.85321	7.19224	7.36056	7.34868	-1.2649	1.12375	1.11454	0.0026	0.0954	0.1191	0.0262654	0.303142	0.345629
SNOWBALL_021096_s_st	SERPINE1	11.8132	12.1522	12.3373	12.2349	-1.26487	1.13691	1.05896	< 0.001	0.0094	0.2059	0.00162466	0.0657976	0.473214
SNOWBALL_045392_st	ABI2	1.8417	2.18052	1.86531	2.01479	-1.26472	-1.24419	-1.12173	0.0011	0.002	0.0709	0.014558	0.0222027	0.252749
SNOWBALL_033916_st	MFHAS1	5.86777	6.20608	6.40858	6.4866	-1.26427	1.1507	1.21463	0.0002	0.0107	0.001	0.00384884	0.0720554	0.0135315
SNOWBALL_009343_st	HSPG2	8.01966	8.35576	8.60798	8.79506	-1.26234	1.19104	1.35595	0.0002	0.0025	< 0.001	0.00426638	0.026175	0.000509224
SNOWBALL_013430_st	ITGA8	10.1112	10.4467	10.4846	10.2245	-1.26182	1.02665	-1.16647	0.0005	0.6315	0.0113	0.00829162	0.831137	0.0749484
SNOWBALL_025003_s_st	CHST15	5.66226	5.99761	5.97794	6.07376	-1.26168	-1.01372	1.0542	0.0014	0.8241	0.3945	0.017024	0.928872	0.666206
SNOWBALL_015287_st	GORASP1	4.91541	5.24957	5.39423	5.4698	-1.26064	1.10547	1.16492	0.0009	0.0973	0.0164	0.0122499	0.306555	0.0966459
SNOWBALL_028598_st		1.97274	2.30671	2.04093	2.02226	-1.26047	-1.20228	-1.21795	0.0031	0.0138	0.0092	0.0303944	0.0860617	0.0652708
SNOWBALL_014468_st	NPEPPS	8.59067	8.92423	9.229	9.43177	-1.26011	1.23523	1.42163	< 0.001	< 0.001	< 0.001	0.000276215	0.000604713	5.22272e-06
SNOWBALL_015859_st	NECTIN3	9.05569	9.38908	9.47023	9.34617	-1.25997	1.05787	-1.03019	< 0.001	0.2161	0.5057	0.00192379	0.486006	0.751182
SNOWBALL_022616_s_st	EIF4EBP1	8.43516	8.76839	8.77394	8.51126	-1.25983	1.00386	-1.1951	0.0003	0.9391	0.0024	0.00500164	0.977217	0.0253701
SNOWBALL_015699_st	BHLHE40	10.1396	10.4723	10.7998	10.8071	-1.25941	1.25484	1.26119	0.0021	0.0024	0.002	0.0228811	0.0249979	0.0220927
SNOWBALL_029736_st	NRP2	8.89499	9.22674	9.2006	9.11356	-1.25854	-1.01829	-1.08161	< 0.001	0.6194	0.0434	0.000383159	0.82424	0.185184
SNOWBALL_010496_s_st	CTSH	10.75	11.0817	11.3853	11.3722	-1.25847	1.23418	1.22305	0.0012	0.0024	0.0033	0.0149034	0.0248658	0.0315083
SNOWBALL_026173_st	GADD45B	6.9304	7.26158	7.76614	7.66397	-1.25804	1.41869	1.32169	0.0015	< 0.001	0.0003	0.0177731	0.000885477	0.00506196
SNOWBALL_014582_st	JUP	7.62577	7.9566	8.12371	8.05783	-1.25774	1.12281	1.07269	< 0.001	0.0027	0.0478	0.000178766	0.0275729	0.197049
SNOWBALL_023183_s_st	IGF2R	6.43408	6.76489	6.84572	6.80593	-1.25772	1.05762	1.02885	0.0012	0.351	0.6323	0.0150809	0.62825	0.831625
SNOWBALL_039515_st	PTPN14	6.28606	6.61618	6.69872	6.59155	-1.25712	1.05888	-1.01722	0.0003	0.2643	0.7344	0.00521795	0.542422	0.886195
SNOWBALL_011418_st	TBC1D19	5.77851	6.10856	6.17678	6.10507	-1.25706	1.04842	-1.00242	< 0.001	0.2531	0.9523	0.00100883	0.530156	0.982274
SNOWBALL_015752_s_st	PXK	8.40655	8.7364	9.12062	9.16887	-1.25688	1.30515	1.34954	0.0009	0.0002	< 0.001	0.0121552	0.00436386	0.00178857
SNOWBALL_019671_st	CALD1,LOC102160748	11.5767	11.9063	12.0187	12.0089	-1.25663	1.08106	1.07374	< 0.001	0.0299	0.0449	0.000182765	0.144986	0.1892
SNOWBALL_021994_s_st	MSRB3	7.66423	7.99353	8.25515	8.1413	-1.2564	1.19882	1.10785	0.0002	0.0013	0.0425	0.00338258	0.0158023	0.182565
SNOWBALL_018233_s_st	ITGAV	7.46227	7.79108	8.01612	7.96098	-1.25598	1.1688	1.12498	0.0011	0.0153	0.0572	0.0143317	0.0923423	0.220835
SNOWBALL_015758_st	EIF4E3	6.95229	7.28102	7.27607	7.11123	-1.25591	-1.00344	-1.1249	< 0.001	0.9263	0.0054	0.000500499	0.972333	0.0446159
SNOWBALL_010438_st	HEATR5A	7.78942	8.11787	8.25232	7.99775	-1.25567	1.09767	-1.08683	< 0.001	0.0409	0.0643	0.00156002	0.178039	0.237614
SNOWBALL_005313_st	PPP1R21	5.47843	5.80578	6.04736	6.08272	-1.2547	1.18229	1.21162	0.0007	0.0071	0.0027	0.0103352	0.0542745	0.0276097
SNOWBALL_024029_s_st	COL6A3	8.33751	8.66473	8.79227	8.64091	-1.25459	1.09243	-1.01665	0.0029	0.1901	0.8015	0.0287024	0.452538	0.918575
SNOWBALL_032615_st	KIRREL	6.07625	6.40284	6.74959	6.91265	-1.25405	1.27169	1.42386	0.0018	0.0011	< 0.001	0.0199913	0.0140168	0.000856217
SNOWBALL_006909_st	RARG	6.94003	7.2657	7.46657	7.3386	-1.25325	1.14939	1.05183	0.0001	0.0065	0.2733	0.0026721	0.0510787	0.552188
SNOWBALL_018494_st	ACKR3	8.17883	8.50409	9.07795	8.95753	-1.25289	1.4885	1.3693	0.0044	< 0.001	0.0003	0.0387608	0.000862645	0.00527595
SNOWBALL_004679_st	TSC2	5.52066	5.84584	6.06137	6.17534	-1.25281	1.16114	1.25658	< 0.001	0.0027	< 0.001	0.00180364	0.0276206	0.00162765
SNOWBALL_003461_s_st	TPM2	10.6873	11.0121	11.1171	10.9661	-1.25253	1.07548	-1.03242	< 0.001	0.0145	0.2467	2.98359e-05	0.0887395	0.522823
SNOWBALL_016002_st	SMIM11A	7.03461	7.35874	7.54188	7.64302	-1.25191	1.13535	1.2178	< 0.001	0.0068	0.0002	0.00142185	0.0525061	0.00387176
SNOWBALL_013793_st	B3GLCT	6.68097	7.00493	7.17623	7.12181	-1.25176	1.12607	1.08439	< 0.001	0.0142	0.0788	0.00218767	0.0876449	0.269476
SNOWBALL_031762_st	FOCAD	6.71325	7.0368	7.10499	7.23299	-1.25141	1.0484	1.14567	0.0007	0.3933	0.0226	0.0106233	0.665109	0.119933
SNOWBALL_025136_s_st	GPC6	5.29342	5.61695	5.62385	5.73592	-1.25139	1.00479	1.08596	0.0002	0.92	0.0977	0.00411535	0.969859	0.307444
SNOWBALL_036127_st	SEL1L	8.55057	8.87405	9.05285	9.10885	-1.25135	1.13194	1.17675	0.0002	0.0184	0.0033	0.0043526	0.104665	0.0317533
SNOWBALL_004241_st	PDGFA	6.03348	6.35573	6.65761	6.55338	-1.25027	1.23275	1.14683	< 0.001	< 0.001	0.0008	0.000245253	0.000434219	0.0108586
SNOWBALL_005466_st	FEZ2	7.01117	7.33265	7.34943	7.16624	-1.24961	1.0117	-1.12226	0.0003	0.8163	0.0324	0.0060881	0.925256	0.152994
SNOWBALL_029754_st	ZBTB18	3.93063	4.25211	4.3692	4.27844	-1.24961	1.08454	1.01842	0.0035	0.2303	0.7827	0.0327964	0.50329	0.909483
SNOWBALL_004580_st	TPST1	6.75723	7.07864	7.47243	7.71275	-1.24955	1.31384	1.55199	0.0011	0.0002	< 0.001	0.0138362	0.00351687	6.09037e-05
SNOWBALL_035222_st	NICN1	7.62478	7.94587	7.95856	7.68548	-1.24927	1.00883	-1.1978	0.0003	0.8605	0.0021	0.00615097	0.944848	0.0227004
SNOWBALL_013509_st	PARD3	6.6583	6.97927	7.32753	7.4168	-1.24917	1.27302	1.35429	0.0003	0.0001	< 0.001	0.00500476	0.00274356	0.000428441
SNOWBALL_015924_st	KLHL24	7.12143	7.4414	7.70389	7.62008	-1.24831	1.19954	1.13185	0.0019	0.0078	0.055	0.0212803	0.0578621	0.215136
SNOWBALL_034567_st	BACH1	5.83795	6.1579	6.24652	6.28513	-1.24828	1.06335	1.0922	0.0017	0.3112	0.1527	0.0191666	0.591159	0.399688
SNOWBALL_030118_st		5.68423	6.00321	6.22752	6.33979	-1.24745	1.16821	1.26275	0.0002	0.0042	0.0001	0.0043585	0.0373973	0.00292803
SNOWBALL_014619_st	FBXL20	6.59449	6.91268	7.19341	7.18096	-1.24676	1.21481	1.20437	0.0048	0.0107	0.0139	0.0411167	0.0721837	0.0865146
SNOWBALL_018161_st	STRADB	7.65613	7.97396	8.3516	8.69305	-1.24646	1.29921	1.64615	0.001	0.0002	< 0.001	0.0132569	0.00418251	1.5189e-05
SNOWBALL_047351_st	RILPL1	6.64223	6.95979	7.05983	7.04534	-1.24623	1.0718	1.06109	0.0002	0.1425	0.2057	0.00346293	0.3841	0.472954
SNOWBALL_013292_st	RGS7	6.3863	6.70354	6.85469	6.84516	-1.24594	1.11046	1.10314	0.0018	0.0931	0.1137	0.0200041	0.298636	0.336532
SNOWBALL_024722_s_st	GHITM	7.84451	8.16042	8.21793	8.45538	-1.24479	1.04067	1.22685	0.0031	0.5353	0.005	0.0300837	0.771517	0.0426772
SNOWBALL_023222_st	C1QTNF1	7.47208	7.78778	7.72108	7.56912	-1.24462	-1.04732	-1.16365	< 0.001	0.2931	0.0026	0.00238898	0.572982	0.0265028
SNOWBALL_024309_s_st	SSH1	5.86348	6.17824	6.41541	6.55795	-1.24381	1.17868	1.30107	< 0.001	0.0013	< 0.001	0.00225306	0.0157122	0.000486999
SNOWBALL_010292_s_st	FOXN3	7.73438	8.04905	8.10184	8.06308	-1.24373	1.03726	1.00977	0.0002	0.4281	0.8316	0.0037301	0.693535	0.932252
SNOWBALL_022891_s_st	TCF7L2	8.94122	9.25511	9.4827	9.40766	-1.24305	1.17088	1.11153	0.0004	0.0056	0.0476	0.00720817	0.0457838	0.196247
SNOWBALL_014618_s_st	ABCC3	5.81975	6.13281	6.33927	6.38937	-1.24234	1.15385	1.19463	0.0051	0.0481	0.0171	0.0429654	0.197793	0.0996668
SNOWBALL_014185_st	SEC14L1	7.19632	7.50919	7.32585	7.37069	-1.24218	-1.13551	-1.10076	0.0001	0.0092	0.0398	0.00272108	0.0648408	0.174928
SNOWBALL_032579_st	EIF4E3	6.95492	7.26735	7.37049	7.34535	-1.2418	1.0741	1.05555	0.0019	0.2396	0.3693	0.0214848	0.514524	0.64453
SNOWBALL_018178_st	ACADL	7.51294	7.82497	8.1399	8.26563	-1.24145	1.24396	1.35723	0.0014	0.0013	< 0.001	0.0172311	0.0163158	0.00156936
SNOWBALL_028149_st		10.3494	10.6612	10.9112	11.0791	-1.24122	1.18927	1.33605	0.003	0.0127	0.0002	0.0293455	0.0812822	0.00476058
SNOWBALL_027276_st		1.8096	2.12061	2.18582	2.19812	-1.24057	1.04624	1.0552	0.0031	0.4771	0.3996	0.0304564	0.730804	0.670286
SNOWBALL_008858_s_st	LDLRAP1	7.85655	8.16723	8.22694	8.10558	-1.24028	1.04226	-1.04365	0.0001	0.3394	0.3245	0.00246683	0.617591	0.603873
SNOWBALL_001531_st	GAB1	7.44262	7.75304	7.95985	8.01792	-1.24006	1.15414	1.20154	0.0009	0.0157	0.0032	0.0124956	0.0938949	0.0310129
SNOWBALL_017805_st	PLEKHA2	5.4717	5.78149	5.95787	5.86635	-1.23953	1.13005	1.06058	0.0004	0.022	0.2401	0.00680609	0.117971	0.515188
SNOWBALL_012962_st	RABGAP1L	6.34303	6.65242	6.81572	6.61106	-1.23919	1.11984	-1.02908	0.0017	0.0643	0.6216	0.0195088	0.23779	0.825507
SNOWBALL_020314_st	EFNB1	6.68014	6.98897	7.14147	7.10532	-1.2387	1.11149	1.08399	0.0001	0.0242	0.0757	0.00278287	0.125596	0.263029
SNOWBALL_023419_s_st	APP	10.0336	10.3423	10.5404	10.5787	-1.23859	1.1472	1.17807	< 0.001	0.0015	0.0003	0.000725554	0.0176366	0.00568132
SNOWBALL_039997_st	PCMTD1	4.29441	4.60299	4.84335	4.95958	-1.23848	1.18129	1.2804	0.0009	0.006	0.0002	0.0122981	0.0481844	0.004685
SNOWBALL_025246_st	POLR2M	7.7775	8.08574	8.20242	8.2723	-1.2382	1.08423	1.13805	0.0009	0.1415	0.025	0.0119229	0.382432	0.12847
SNOWBALL_020922_s_st	GANAB	8.49926	8.80722	8.96579	9.14994	-1.23796	1.11618	1.26814	< 0.001	0.0008	< 0.001	5.39796e-05	0.0116083	1.93765e-05
SNOWBALL_014097_st	GPC6	7.37693	7.6841	7.93386	7.92425	-1.23728	1.18901	1.18111	0.0007	0.0037	0.0048	0.0103247	0.0340295	0.0414678
SNOWBALL_003899_st	PCSK6	7.01559	7.32249	7.29879	6.94349	-1.23704	-1.01656	-1.30044	0.0002	0.7181	< 0.001	0.00427745	0.878055	0.000826945
SNOWBALL_002855_st	PELI2	6.95133	7.25823	7.5989	7.44914	-1.23704	1.26635	1.14148	0.0009	0.0003	0.022	0.0120922	0.00608899	0.117907
SNOWBALL_005953_st	NIT1	6.15298	6.45978	6.90533	7.39018	-1.23697	1.36183	1.9058	0.001	< 0.001	< 0.001	0.0129822	0.00085463	8.48945e-07
SNOWBALL_037263_st	AGAP1	6.24764	6.55442	7.00471	7.15956	-1.23695	1.36632	1.52113	0.0006	< 0.001	< 0.001	0.00873216	0.000458322	3.0583e-05
SNOWBALL_028277_st	DAB2	9.0072	9.31378	9.67207	9.85582	-1.23678	1.2819	1.45602	< 0.001	< 0.001	< 0.001	0.00019724	4.64538e-05	8.34076e-07
SNOWBALL_005507_st	YPEL5	7.05048	7.357	7.70116	7.79505	-1.23672	1.26941	1.35477	0.0025	0.001	0.0001	0.0255224	0.0130097	0.0024481
SNOWBALL_025784_s_st	SERPINE1	11.7587	12.0652	12.2253	12.1458	-1.23668	1.11734	1.05748	0.0001	0.0185	0.2051	0.00287282	0.104861	0.472182
SNOWBALL_011345_s_st	FRYL	8.43328	8.73962	8.94526	8.86074	-1.23657	1.1532	1.08758	0.0012	0.0183	0.1414	0.0155367	0.104274	0.382382
SNOWBALL_032698_st	LPP	8.87299	9.17888	9.2401	9.21905	-1.23618	1.04335	1.02824	0.0009	0.4267	0.5999	0.0121354	0.692369	0.812361
SNOWBALL_019749_st	HILPDA	7.87379	8.17874	8.76966	8.77033	-1.23537	1.50621	1.50691	0.0017	< 0.001	< 0.001	0.0198004	0.000125989	0.000124644
SNOWBALL_027231_st	TMEM62	3.88382	4.18814	4.4474	4.37716	-1.23483	1.19687	1.13999	0.0052	0.0142	0.062	0.043927	0.0876076	0.232348
SNOWBALL_018823_st	ADAMTS6	8.34413	8.64818	8.6225	8.60635	-1.23461	-1.01796	-1.02941	0.0002	0.6923	0.5209	0.004184	0.864795	0.761658
SNOWBALL_033964_s_st	SCARA3	7.01129	7.31464	7.30227	7.22694	-1.234	-1.00861	-1.06267	0.0005	0.8606	0.2238	0.00763286	0.944899	0.495405
SNOWBALL_009295_st	PLOD1	7.76519	8.06828	8.48529	8.84584	-1.23379	1.33515	1.71422	0.0003	< 0.001	< 0.001	0.00602537	0.000498775	1.40603e-06
SNOWBALL_014965_st	ZNF287	5.11827	5.42119	5.58301	5.72418	-1.23363	1.1187	1.2337	0.001	0.0474	0.001	0.0131943	0.195951	0.0131768
SNOWBALL_024175_s_st	PI4KA	7.73749	8.04013	8.17747	8.15463	-1.2334	1.09988	1.0826	< 0.001	0.0113	0.0298	0.000454289	0.0751578	0.144739
SNOWBALL_039461_st	PEX1	6.24901	6.55119	6.8001	6.78712	-1.233	1.18831	1.17767	0.0062	0.0195	0.0256	0.0492238	0.108614	0.130531
SNOWBALL_020047_s_st	LOC106504682	10.6782	10.9804	11.144	11.3141	-1.23299	1.12006	1.26028	0.0005	0.0326	0.0002	0.00832668	0.153742	0.00417991
SNOWBALL_034775_st	ITFG1	4.26632	4.56846	4.9709	5.17133	-1.23297	1.32174	1.51874	0.0027	0.0002	< 0.001	0.0276029	0.00459278	0.000166292
SNOWBALL_031052_st	CTDSPL	5.91427	6.21527	6.34654	6.10592	-1.232	1.09525	-1.07875	0.0055	0.1809	0.2609	0.045365	0.440031	0.538771
SNOWBALL_037502_st		1.94949	2.24989	2.59794	2.73296	-1.23148	1.27284	1.39772	0.0007	0.0002	< 0.001	0.01053	0.00384012	0.000265411
SNOWBALL_018730_st	GALNT10	6.15256	6.45203	6.46576	6.39811	-1.23069	1.00957	-1.03808	0.0004	0.8387	0.4286	0.00622864	0.935299	0.693988
SNOWBALL_016073_st	PRICKLE2	2.53895	2.8379	3.14605	3.17211	-1.23025	1.23812	1.26069	0.0061	0.005	0.0028	0.048982	0.0424887	0.0279872
SNOWBALL_029463_st	TPP1	7.83431	8.13302	8.61847	8.69531	-1.23004	1.40003	1.47661	0.0014	< 0.001	< 0.001	0.0170361	0.000481228	0.000129703
SNOWBALL_034080_st	CTIF	5.94301	6.24114	6.2055	6.31042	-1.22955	-1.02501	1.0492	0.0026	0.6765	0.4209	0.026855	0.856314	0.687667
SNOWBALL_005052_st	PELI1	6.5628	6.86062	6.95562	6.88271	-1.22928	1.06807	1.01543	0.0022	0.2633	0.7909	0.0237979	0.541323	0.913404
SNOWBALL_027054_st	GGCX	6.95756	7.25431	7.59126	7.56407	-1.22838	1.26309	1.2395	0.006	0.0024	0.0045	0.0482333	0.0252676	0.0392736
SNOWBALL_034836_st	PALLD	10.0625	10.3593	10.3274	10.2114	-1.22836	-1.02236	-1.1079	< 0.001	0.4562	0.0027	0.000157044	0.715443	0.0275662
SNOWBALL_016016_st	LPP	8.97515	9.2717	9.27966	9.22693	-1.22821	1.00553	-1.03152	0.0005	0.9077	0.517	0.00750362	0.964586	0.758978
SNOWBALL_022218_s_st	GANAB	8.21881	8.51527	8.68456	8.86529	-1.22813	1.1245	1.27458	< 0.001	0.002	< 0.001	0.000361556	0.0216722	8.03499e-05
SNOWBALL_022257_st	GALNT10	6.1231	6.41867	6.58951	6.55538	-1.22736	1.12571	1.0994	0.0025	0.0548	0.1168	0.0256818	0.21475	0.34183
SNOWBALL_013936_st	UGGT2	7.01773	7.31146	7.66911	7.70301	-1.22581	1.28134	1.3118	0.0061	0.0014	0.0007	0.0489156	0.0172817	0.00991546
SNOWBALL_047651_st	ST3GAL2	6.2321	6.52501	6.48121	6.54231	-1.22511	-1.03083	1.01206	0.003	0.6083	0.8391	0.029388	0.817546	0.935395
SNOWBALL_047048_st	LPP	9.69106	9.98393	10.17	10.1495	-1.22508	1.13764	1.1216	0.0041	0.0495	0.0768	0.0369091	0.201267	0.265355
SNOWBALL_008916_st	RLF	6.63174	6.9244	7.1198	7.20098	-1.2249	1.14504	1.21132	0.0056	0.0487	0.0081	0.0461874	0.199359	0.0597046
SNOWBALL_002285_st	ZNF292	6.81212	7.10474	7.43937	7.52137	-1.22486	1.26105	1.33481	0.0024	0.0008	0.0001	0.0252594	0.0114739	0.00248211
SNOWBALL_032970_st		5.96783	6.25995	6.39691	6.41004	-1.22444	1.09958	1.10964	0.0031	0.1219	0.0924	0.0299256	0.350505	0.297245
SNOWBALL_002793_st	SPG11	7.00122	7.2933	7.59341	7.73399	-1.2244	1.23124	1.35725	0.0007	0.0005	< 0.001	0.00980023	0.00819254	0.000419748
SNOWBALL_001636_s_st	RAB9A	6.7446	7.0352	7.20304	7.29117	-1.22315	1.12337	1.19414	0.0025	0.0548	0.0061	0.0255311	0.214585	0.0486321
SNOWBALL_005473_st	UGP2	8.48074	8.77068	8.94401	8.86167	-1.22259	1.12766	1.0651	0.0021	0.0439	0.2677	0.0229208	0.186434	0.546171
SNOWBALL_024721_s_st	LOC100627813	6.14055	6.42978	6.52933	6.79357	-1.22199	1.07144	1.2868	0.0018	0.2182	0.0002	0.0207474	0.488618	0.00479203
SNOWBALL_012771_st	SEMA3D	8.62664	8.91539	8.54333	8.23845	-1.22158	-1.2942	-1.59874	0.003	0.0004	< 0.001	0.0297985	0.00641076	4.23265e-05
SNOWBALL_023821_s_st	RASSF2	4.97689	5.26557	5.2824	5.06949	-1.22153	1.01173	-1.14558	0.0038	0.8464	0.0356	0.0351743	0.938859	0.162907
SNOWBALL_014684_st	ACACA	6.8705	7.1581	7.00735	6.79413	-1.22061	-1.11015	-1.28696	0.0024	0.0776	0.0003	0.0251543	0.266948	0.00583409
SNOWBALL_006434_st	LOC100624559	6.93049	7.21737	7.43847	7.53547	-1.21999	1.16563	1.24669	0.0015	0.0096	0.0006	0.0179643	0.0667941	0.00952199
SNOWBALL_037181_st	MRM2	6.37473	6.66105	6.81677	6.87316	-1.21952	1.11398	1.15839	0.0036	0.0819	0.0223	0.0333105	0.275798	0.119091
SNOWBALL_025933_s_st	ARSA	6.88675	7.17237	7.53325	7.51725	-1.21894	1.2842	1.27004	0.0033	0.0005	0.0007	0.0312778	0.00778188	0.0104711
SNOWBALL_001679_s_st		6.66977	6.95527	7.36562	7.15158	-1.21883	1.32901	1.14577	0.0056	0.0003	0.0429	0.0459695	0.00545245	0.183626
SNOWBALL_008279_st	GYS1	8.21063	8.49601	8.6772	8.46053	-1.21873	1.13382	-1.0249	0.0012	0.024	0.6319	0.0151725	0.124785	0.831321
SNOWBALL_010317_s_st	CTSH	9.81987	10.105	10.5373	10.5739	-1.21852	1.34942	1.38406	0.0047	0.0001	< 0.001	0.0409024	0.00309781	0.00166435
SNOWBALL_009079_st	PTPRF	7.0666	7.35151	7.67259	7.83209	-1.21833	1.24927	1.39531	0.001	0.0004	< 0.001	0.0135467	0.00623477	0.000249064
SNOWBALL_004711_st	PGP	6.85532	7.14015	7.20485	7.13652	-1.21827	1.04586	-1.00252	0.0053	0.4742	0.9677	0.0441291	0.728735	0.987774
SNOWBALL_029583_st	VPS8	5.79235	6.07695	6.35698	6.2417	-1.21807	1.21422	1.12098	0.0017	0.002	0.0452	0.0198575	0.0217442	0.189951
SNOWBALL_011652_st	PDE5A	8.1748	8.45832	8.44615	8.17756	-1.21716	-1.00847	-1.21483	0.0055	0.8922	0.0059	0.0454899	0.958287	0.0476392
SNOWBALL_019195_s_st	MYL9	9.61026	9.89376	10.0725	9.94022	-1.21715	1.13188	1.03273	0.0005	0.0154	0.4911	0.00858858	0.092622	0.74098
SNOWBALL_016099_s_st	APP	10.6298	10.912	11.1315	11.1646	-1.21608	1.16429	1.19134	< 0.001	0.0007	0.0002	0.00175848	0.0106351	0.00406984
SNOWBALL_033867_st	LPP	9.65126	9.93346	10.0682	10.0336	-1.21604	1.09787	1.0719	0.0018	0.0932	0.2029	0.020235	0.298781	0.469401
SNOWBALL_001554_st	ATM	6.17087	6.45011	6.60819	6.88433	-1.21356	1.1158	1.35118	0.0012	0.0417	< 0.001	0.0155586	0.180282	0.000614698
SNOWBALL_016963_s_st	DDX50	6.5624	6.84146	6.90856	7.04133	-1.2134	1.04761	1.14859	0.0002	0.2669	0.0035	0.00410993	0.545404	0.0327059
SNOWBALL_020690_st	BCAP31	7.25909	7.53725	7.66128	7.73596	-1.21265	1.08977	1.14767	< 0.001	0.0072	0.0001	0.000201701	0.0545907	0.00325434
SNOWBALL_005092_s_st	CRIM1	9.66113	9.93911	9.83829	9.50643	-1.2125	-1.07238	-1.34974	0.0009	0.1603	< 0.001	0.0124122	0.410951	0.000444126
SNOWBALL_011379_st	FRYL	8.46735	8.74496	8.84331	8.74299	-1.21219	1.07055	-1.00137	0.0019	0.2086	0.9793	0.0215529	0.476421	0.992082
SNOWBALL_009326_st	AK4	7.38286	7.66008	8.1777	8.16099	-1.21186	1.43159	1.4151	0.0038	< 0.001	< 0.001	0.035117	0.000450309	0.000595913
SNOWBALL_026600_st	COL6A2	8.99115	9.26826	9.42021	9.45373	-1.21176	1.11108	1.13719	0.0001	0.0137	0.0038	0.00274956	0.0854812	0.0351001
SNOWBALL_022951_s_st	FOXN3	9.01006	9.28521	9.43106	9.46196	-1.21012	1.10638	1.13034	0.0012	0.0536	0.0225	0.015133	0.211836	0.119821
SNOWBALL_008083_st	ZNF521	5.54664	5.82032	5.7991	5.88624	-1.20889	-1.01481	1.04676	0.0062	0.8104	0.4595	0.0496677	0.922544	0.717897
SNOWBALL_019848_st	FKBP14	7.96098	8.23366	8.29522	8.47181	-1.20805	1.04359	1.17948	0.0026	0.4323	0.0066	0.0263048	0.696892	0.0518314
SNOWBALL_041271_st	LOC102161916	6.09101	6.36308	6.46483	6.28253	-1.20754	1.07308	-1.05742	0.001	0.1515	0.2505	0.0130489	0.397879	0.527281
SNOWBALL_038597_st		1.2021	1.47362	1.27917	1.35509	-1.20708	-1.14429	-1.08563	0.0056	0.0361	0.1821	0.0461946	0.164142	0.441663
SNOWBALL_000134_st	MIEN1	7.40731	7.67775	7.78337	7.89244	-1.20618	1.07596	1.16046	0.003	0.1919	0.0137	0.0297112	0.454982	0.0854351
SNOWBALL_041953_st	COG6	1.41829	1.68783	1.42038	1.51215	-1.20543	-1.20369	-1.1295	0.002	0.0021	0.0288	0.0219958	0.0230023	0.141373
SNOWBALL_002443_s_st	HACE1	7.39703	7.66588	7.89888	7.83861	-1.20485	1.17527	1.12719	0.0019	0.0054	0.0299	0.0212249	0.0449513	0.145112
SNOWBALL_007539_st	WASHC4	8.28437	8.55322	8.88333	8.99295	-1.20484	1.25711	1.35636	0.0022	0.0004	< 0.001	0.0238599	0.0067351	0.000752038
SNOWBALL_022449_st	UBL4A	6.37982	6.64791	6.72924	6.63131	-1.20421	1.05799	-1.01157	0.0003	0.1863	0.7817	0.00584941	0.447459	0.909042
SNOWBALL_007740_st	PRICKLE1	7.80616	8.07407	8.13572	8.15924	-1.20406	1.04366	1.06081	< 0.001	0.2143	0.093	0.00119281	0.483661	0.298469
SNOWBALL_041041_st	LPP	8.72466	8.99175	9.1488	9.07557	-1.20338	1.115	1.05982	0.003	0.0569	0.2896	0.0296211	0.219934	0.569453
SNOWBALL_009327_s_st	FHL3	6.60818	6.87521	6.89526	6.73171	-1.20333	1.01399	-1.10458	0.0011	0.7697	0.0489	0.0143032	0.903317	0.199861
SNOWBALL_010455_s_st	ZBTB1	6.64095	6.90786	6.98977	6.94849	-1.20323	1.05842	1.02856	0.0021	0.277	0.5844	0.0226086	0.556292	0.802912
SNOWBALL_006520_st	FAM69A	7.77649	8.04196	8.16237	8.15217	-1.20203	1.08704	1.07938	0.0017	0.1081	0.1388	0.0198609	0.326522	0.378298
SNOWBALL_027514_st	PTDSS2	4.97579	5.24088	5.28257	5.42659	-1.20171	1.02932	1.13738	0.0004	0.492	0.0064	0.00662782	0.74165	0.0506507
SNOWBALL_023693_s_st	MYL9	9.04814	9.31184	9.39162	9.29428	-1.20056	1.05685	-1.01225	0.0001	0.1515	0.7445	0.00305705	0.39786	0.891323
SNOWBALL_025221_st	ALDH1L2	9.14687	9.41052	9.74425	9.87127	-1.20051	1.26027	1.37626	0.0024	0.0003	< 0.001	0.025443	0.00591055	0.000472524
SNOWBALL_000264_s_st	DLG1	7.05765	7.32098	7.48094	7.40624	-1.20025	1.11725	1.06088	0.0015	0.0336	0.2332	0.0177137	0.15663	0.506764
SNOWBALL_000697_st	RHOB	6.95073	7.21395	7.37822	7.32849	-1.20015	1.1206	1.08263	0.0016	0.031	0.1186	0.018752	0.14855	0.34492
SNOWBALL_011823_st	HADH	7.69469	7.95764	7.97765	7.97157	-1.19993	1.01397	1.0097	< 0.001	0.6155	0.7262	0.000255542	0.821878	0.882058
SNOWBALL_011148_s_st	CHD8	8.21383	8.47659	8.73117	8.834	-1.19977	1.19299	1.28113	0.0024	0.0031	0.0002	0.025361	0.0300614	0.00351419
SNOWBALL_030787_st	UNC5A	4.98653	5.24923	4.82415	4.93082	-1.19972	-1.34264	-1.24695	0.006	0.0001	0.0015	0.0485729	0.00249367	0.0175939
SNOWBALL_030217_st	NAV1	6.94592	7.20837	7.23911	7.40478	-1.19951	1.02154	1.14585	< 0.001	0.4994	0.0004	0.00079954	0.746627	0.00720695
SNOWBALL_009072_st	CLSTN1	6.87923	7.14137	7.34052	7.3607	-1.19925	1.14802	1.16419	< 0.001	0.0002	< 0.001	0.00054551	0.00476411	0.00232647
SNOWBALL_007407_s_st	PYROXD1	5.5581	5.81982	5.99916	5.9524	-1.19891	1.13236	1.09625	0.0033	0.0309	0.0994	0.0313655	0.148348	0.310511
SNOWBALL_030607_st	SIX5	5.99383	6.25522	6.22351	6.23376	-1.19863	-1.02222	-1.01498	0.0028	0.6742	0.7757	0.0278741	0.85503	0.906088
SNOWBALL_030196_st	MEX3B	4.65889	4.91998	4.93966	4.87302	-1.19838	1.01373	-1.03308	0.0007	0.7563	0.462	0.0101841	0.897043	0.719763
SNOWBALL_021339_st	TPP1	6.36728	6.62833	6.77565	6.77116	-1.19835	1.10751	1.10406	0.0002	0.0151	0.0179	0.00387996	0.0913405	0.102566
SNOWBALL_010678_st	BTBD7	7.64425	7.9052	8.09889	8.05354	-1.19827	1.14369	1.1083	0.0019	0.0144	0.0516	0.0215319	0.0883444	0.206817
SNOWBALL_016058_s_st	APP	9.6596	9.91977	10.204	10.2846	-1.19762	1.21774	1.28772	0.0007	0.0003	< 0.001	0.0104252	0.00577043	0.000853464
SNOWBALL_006820_st	NUAK1	7.81713	8.07727	7.86683	7.96593	-1.1976	-1.15704	-1.08023	0.0022	0.0096	0.1391	0.0237229	0.0668591	0.378813
SNOWBALL_002770_s_st	FBN1	10.4974	10.7569	10.9909	10.9854	-1.19709	1.17612	1.17162	0.0008	0.0018	0.0022	0.0109706	0.0204231	0.0233969
SNOWBALL_023261_s_st	IRAK4	7.17216	7.43167	7.67701	7.63768	-1.19707	1.18537	1.15349	0.002	0.003	0.0098	0.0217038	0.029546	0.0677881
SNOWBALL_023359_s_st	EPHA4	7.42834	7.68742	7.82787	7.76568	-1.19672	1.10225	1.05574	0.0039	0.0861	0.3234	0.0354389	0.284648	0.602781
SNOWBALL_036233_st	IQSEC1	6.10536	6.36418	6.26122	6.23408	-1.19649	-1.07397	-1.09436	0.0008	0.1214	0.0553	0.0114617	0.349517	0.215995
SNOWBALL_005123_st	BABAM2	7.54654	7.80512	7.81327	7.68309	-1.1963	1.00566	-1.08826	0.0052	0.9202	0.1467	0.0437693	0.969922	0.390471
SNOWBALL_005725_st	LACTB2	5.95836	6.21687	6.42888	6.45131	-1.19625	1.1583	1.17644	0.0003	0.0015	0.0006	0.00499744	0.0179504	0.00969011
SNOWBALL_016212_st	GOLGB1	7.60881	7.86705	7.93805	7.93337	-1.19602	1.05045	1.04705	0.001	0.2868	0.3186	0.0134312	0.566542	0.598286
SNOWBALL_002523_st	LIPG	10.7623	11.0205	11.2227	10.9535	-1.19597	1.15045	-1.04752	0.0049	0.0211	0.4093	0.041628	0.114487	0.678261
SNOWBALL_024671_s_st	HK1	7.78705	8.04355	8.34113	8.25351	-1.19458	1.22908	1.15666	0.002	0.0006	0.0083	0.0223574	0.00909896	0.0607911
SNOWBALL_013612_st	DIP2C	6.68797	6.94396	6.87696	6.76612	-1.19416	-1.04753	-1.13119	0.0017	0.3386	0.0186	0.0193598	0.616825	0.105407
SNOWBALL_001893_st	IL13RA1	6.30182	6.5578	7.02838	7.19147	-1.19415	1.38567	1.55151	0.0047	< 0.001	< 0.001	0.0404749	0.000654546	4.45329e-05
SNOWBALL_005702_st	SDC2	10.0825	10.3377	10.4833	10.4364	-1.19352	1.10614	1.07077	0.0001	0.0117	0.0717	0.00300238	0.0767633	0.25431
SNOWBALL_042541_st	TMTC1	5.87846	6.13321	6.16891	6.14765	-1.19314	1.02505	1.01005	0.0045	0.6495	0.8538	0.0392598	0.841297	0.942052
SNOWBALL_026576_st	PAFAH1B1	6.85718	7.11086	7.27712	7.2883	-1.19224	1.12214	1.13088	0.0055	0.0518	0.0394	0.0454543	0.207174	0.173984
SNOWBALL_047473_st	LHFPL2	7.85794	8.11154	8.57576	8.89931	-1.19217	1.37957	1.72641	0.0063	< 0.001	< 0.001	0.0499473	0.000985544	7.65062e-06
SNOWBALL_020074_st		8.26441	8.51781	8.51108	8.25917	-1.19201	-1.00467	-1.19635	0.0017	0.9215	0.0014	0.0191821	0.970482	0.0170171
SNOWBALL_028637_st	MTA1	7.39761	7.65094	7.7908	7.78896	-1.19196	1.10179	1.10039	0.0004	0.0259	0.0277	0.00689244	0.131756	0.137593
SNOWBALL_003256_st	FBN1	10.998	11.2512	11.5003	11.4048	-1.19187	1.18843	1.1123	0.001	0.0011	0.0266	0.0130281	0.0144062	0.133924
SNOWBALL_023007_s_st	SMARCA2	6.95836	7.21089	7.34373	7.43402	-1.19129	1.09644	1.16726	0.0008	0.0453	0.0022	0.0111852	0.190195	0.0233336
SNOWBALL_021292_st	DAB2	8.15477	8.40665	8.7956	8.94165	-1.19076	1.30943	1.44894	0.0004	< 0.001	< 0.001	0.00738556	0.000235955	1.16547e-05
SNOWBALL_016879_s_st	SGPL1	6.13806	6.3894	6.55584	6.57326	-1.19031	1.12228	1.13592	0.0031	0.0347	0.0214	0.0298667	0.160155	0.115835
SNOWBALL_032945_st	PLXNA1	7.37569	7.6264	7.70334	7.61633	-1.18979	1.05478	-1.00701	0.0006	0.2097	0.8663	0.00915459	0.477757	0.947491
SNOWBALL_019583_st	ESYT2	8.12819	8.37869	8.55107	8.52622	-1.18962	1.12691	1.10767	< 0.001	0.0003	0.0013	0.000309877	0.00603629	0.0163866
SNOWBALL_021655_s_st	DPP7	7.84222	8.09268	8.14982	8.20324	-1.18959	1.0404	1.07965	0.0005	0.331	0.0703	0.00744897	0.609945	0.251238
SNOWBALL_010676_st	SEL1L	9.22923	9.47942	9.6666	9.77461	-1.18936	1.13854	1.22705	0.0013	0.0104	0.0003	0.0164001	0.0708783	0.00564164
SNOWBALL_033791_st	LPP	11.2377	11.4877	11.5723	11.5289	-1.18927	1.06036	1.02893	0.0029	0.2517	0.5708	0.028398	0.528525	0.794431
SNOWBALL_021346_s_st	ANTXR2	8.05152	8.30142	8.61082	8.61529	-1.18912	1.2392	1.24304	0.0019	0.0003	0.0003	0.0210603	0.00545017	0.00493311
SNOWBALL_013398_st	JCAD	6.07381	6.32366	6.38969	6.23053	-1.18908	1.04683	-1.06668	0.0042	0.3915	0.2321	0.0376696	0.66357	0.505452
SNOWBALL_018728_st	ANXA6	8.90745	9.15728	9.25281	9.07537	-1.18906	1.06846	-1.05841	0.0003	0.102	0.1564	0.00598633	0.315362	0.405222
SNOWBALL_034825_st	ARHGEF6	6.88798	7.13723	7.5209	7.61109	-1.1886	1.30465	1.38882	0.0025	< 0.001	< 0.001	0.0258578	0.00140245	0.000232139
SNOWBALL_035110_st	CALCOCO1	7.11095	7.35972	7.44575	7.3968	-1.18819	1.06145	1.02604	0.0048	0.2739	0.6319	0.0410274	0.552932	0.831371
SNOWBALL_010081_s_st	PPARD	6.51357	6.76189	6.98612	6.94286	-1.18782	1.16815	1.13364	0.004	0.0079	0.0262	0.0361486	0.0584773	0.132784
SNOWBALL_005303_st	RNF181	7.96357	8.21143	8.23066	8.0928	-1.18745	1.01341	-1.08571	0.0043	0.7996	0.1308	0.0379476	0.917683	0.36529
SNOWBALL_010605_st	PTPN21	7.22068	7.46819	7.66011	7.66908	-1.18716	1.14228	1.1494	0.0005	0.0038	0.0027	0.00775989	0.0347539	0.0272888
SNOWBALL_007170_st	LPCAT3	8.68114	8.92859	8.83333	8.51221	-1.18711	-1.06826	-1.33458	< 0.001	0.0533	< 0.001	0.00159522	0.210985	1.46823e-05
SNOWBALL_003434_st	INVS	7.21307	7.46052	7.65652	7.69779	-1.18711	1.14551	1.17876	0.0002	0.0013	0.0002	0.00337833	0.0160758	0.00459779
SNOWBALL_014493_s_st	COL1A1	11.4152	11.6626	11.7616	11.8407	-1.18705	1.07102	1.13139	< 0.001	0.0145	0.0002	0.000219021	0.0889886	0.0032838
SNOWBALL_019963_st	VPS41	7.45489	7.70218	7.79455	7.60748	-1.18697	1.06613	-1.06784	0.0004	0.1109	0.1029	0.006177	0.331632	0.317058
SNOWBALL_026912_s_st	FAM162A	6.82379	7.07021	7.22002	7.20635	-1.18626	1.10943	1.09896	0.0016	0.0354	0.0531	0.0190428	0.162164	0.210525
SNOWBALL_002872_st	KDM4C	6.28067	6.52703	6.87504	6.89255	-1.1862	1.27281	1.28835	0.0039	0.0002	0.0001	0.0355393	0.00423991	0.00294855
SNOWBALL_008325_s_st	CIC	6.47745	6.72364	6.74764	6.70477	-1.18607	1.01677	-1.01317	0.0037	0.7447	0.7977	0.0340407	0.891417	0.916773
SNOWBALL_009007_st	NKAIN1	5.953	6.19869	6.62691	6.68686	-1.18566	1.34557	1.40267	0.0015	< 0.001	< 0.001	0.0179882	0.000283112	8.61357e-05
SNOWBALL_027342_st	ZMIZ1	6.70586	6.95151	7.11515	7.3827	-1.18563	1.12012	1.34835	0.006	0.0511	< 0.001	0.0483294	0.205502	0.0013097
SNOWBALL_008221_s_st	MEGF8	5.11041	5.35577	5.39984	5.41593	-1.18539	1.03102	1.04258	0.0025	0.5292	0.393	0.0258099	0.767339	0.664808
SNOWBALL_024346_s_st	HECTD4	6.28374	6.52899	6.57973	6.67639	-1.18529	1.0358	1.10757	0.0049	0.51	0.0679	0.0421688	0.754085	0.245945
SNOWBALL_016232_st	ROR2	6.09743	6.3421	6.52525	6.44674	-1.18483	1.13536	1.07523	0.0027	0.0173	0.1489	0.027205	0.100327	0.393817
SNOWBALL_006475_st	TBX15	6.72059	6.96498	7.12718	6.97069	-1.18459	1.11899	1.00397	0.0019	0.0255	0.932	0.0211344	0.130162	0.9746
SNOWBALL_022094_st	FBN1	9.78947	10.0334	10.3433	10.377	-1.18423	1.23957	1.2689	0.0057	0.0009	0.0004	0.0465367	0.0125515	0.0064016
SNOWBALL_019388_st	PLCG1	5.01168	5.2556	5.3409	5.40405	-1.1842	1.06091	1.10838	0.0058	0.2828	0.071	0.0474092	0.56234	0.252795
SNOWBALL_009835_s_st	PBX2	7.86101	8.10479	8.13063	8.05067	-1.1841	1.01807	-1.03822	0.0061	0.7422	0.4934	0.0488489	0.890219	0.742636
SNOWBALL_001805_s_st	ATG4A	6.52216	6.76569	7.09447	7.24168	-1.18389	1.25595	1.39086	0.0036	0.0003	< 0.001	0.0335708	0.00541896	0.00027971
SNOWBALL_015421_st	IMPDH2	9.17019	9.41329	9.36039	9.35076	-1.18353	-1.03734	-1.04429	0.001	0.3961	0.318	0.0134343	0.667512	0.597644
SNOWBALL_012374_st	C9H11orf1	6.12122	6.36416	6.70576	7.28485	-1.1834	1.26716	1.89302	0.0049	0.0003	< 0.001	0.0421026	0.00558732	7.73293e-07
SNOWBALL_005063_st	PXDN	6.75051	6.99295	7.11853	7.26667	-1.18299	1.09095	1.20892	0.002	0.0746	0.0007	0.0221214	0.260897	0.0107187
SNOWBALL_019900_st	ZNF277	7.29975	7.54092	7.60696	7.53364	-1.18195	1.04684	-1.00506	0.0034	0.3614	0.9189	0.0324566	0.637563	0.969379
SNOWBALL_008149_st	CEBPG	7.51479	7.75579	7.95895	8.03325	-1.18181	1.15122	1.21206	0.0044	0.0131	0.0015	0.0388845	0.0828345	0.0181104
SNOWBALL_002114_st	UTRN	8.67951	8.92043	9.20244	9.316	-1.18175	1.21588	1.31546	0.0009	0.0002	< 0.001	0.011941	0.00411747	0.000263535
SNOWBALL_002207_st	RNF217	6.58046	6.82116	7.01785	7.04862	-1.18157	1.14606	1.17077	0.0023	0.0092	0.0035	0.0241379	0.0649132	0.0327117
SNOWBALL_011333_st	OCIAD1	7.55621	7.79603	8.03311	8.16616	-1.18085	1.1786	1.29246	0.005	0.0055	0.0001	0.0427914	0.0451988	0.0029092
SNOWBALL_003959_st	CERCAM	4.90355	5.1429	5.4603	5.36485	-1.18046	1.24608	1.16631	0.0061	0.0007	0.0098	0.0488219	0.0102254	0.0682185
SNOWBALL_012437_st	HIKESHI	6.50756	6.74688	6.81845	6.97101	-1.18043	1.05087	1.16808	0.0007	0.2289	0.0012	0.0103053	0.501626	0.0154271
SNOWBALL_006506_st	INTS3	6.20342	6.44181	6.84193	7.22088	-1.17968	1.31962	1.71602	0.0001	< 0.001	< 0.001	0.00249639	2.65866e-05	4.15325e-08
SNOWBALL_004207_st	PCSK6	7.10729	7.34527	7.21546	6.89966	-1.17934	-1.09415	-1.36188	0.0058	0.102	< 0.001	0.0472733	0.315472	0.00073982
SNOWBALL_008117_st	LOC100624411	9.62729	9.86519	10.0691	10.0553	-1.17928	1.1518	1.14082	< 0.001	0.0002	0.0004	0.00124954	0.004078	0.00670115
SNOWBALL_029377_st	STRIP2	0.925491	1.16157	1.13204	1.17493	-1.17779	-1.02068	1.00931	0.0046	0.6856	0.8543	0.0397921	0.861171	0.942246
SNOWBALL_014704_s_st	ACLY	9.28289	9.51872	9.4132	9.18723	-1.17758	-1.07587	-1.2583	< 0.001	0.0067	< 0.001	0.000191873	0.052393	7.59544e-06
SNOWBALL_014419_s_st	ACLY	9.00938	9.24436	9.17879	8.92181	-1.17689	-1.0465	-1.25054	< 0.001	0.1303	< 0.001	0.00103902	0.364535	6.25761e-05
SNOWBALL_023545_st	CHRDL1	7.62858	7.86236	7.98441	7.88197	-1.17591	1.08827	1.01368	0.0026	0.0821	0.7695	0.0269044	0.276294	0.903229
SNOWBALL_002924_st	MYO9A	6.85852	7.09226	7.30088	7.30386	-1.17588	1.15558	1.15797	0.0017	0.0041	0.0037	0.0198609	0.0367315	0.034173
SNOWBALL_041601_st	KIAA0100	8.34218	8.57592	8.71544	8.59603	-1.17588	1.10154	1.01403	0.0021	0.0444	0.7573	0.023056	0.18773	0.897542
SNOWBALL_036068_st	COL6A2	9.78121	10.0148	10.1092	10.1147	-1.17575	1.0676	1.07171	0.0013	0.1371	0.1169	0.0164814	0.375472	0.342004
SNOWBALL_017807_st	DDHD2	7.25226	7.4856	7.68668	7.83802	-1.17555	1.14956	1.2767	0.0039	0.0103	0.0001	0.0353411	0.0701356	0.00255898
SNOWBALL_007914_st	MTSS1L	6.40946	6.64212	6.96235	6.97944	-1.175	1.24853	1.26341	0.0004	< 0.001	< 0.001	0.00631469	0.000525538	0.000335185
SNOWBALL_026659_s_st	CSTB	9.1252	9.35779	9.65418	9.65285	-1.17494	1.22807	1.22694	0.0048	0.0007	0.0008	0.0413517	0.0105343	0.0108385
SNOWBALL_031692_st	GLG1	7.73379	7.96599	8.08639	8.21013	-1.17463	1.08703	1.18439	0.001	0.0546	0.0007	0.0135953	0.214174	0.00994742
SNOWBALL_005851_st	RIT1	6.7566	6.98846	7.16951	7.09158	-1.17435	1.1337	1.07409	0.005	0.0219	0.1676	0.042629	0.117663	0.421308
SNOWBALL_021173_s_st	RRBP1	6.64215	6.87353	7.04527	7.18743	-1.17396	1.12642	1.24307	0.0058	0.0311	0.0005	0.0470263	0.148998	0.00835576
SNOWBALL_010554_st	CLK3	5.79076	6.02209	6.16117	6.24789	-1.17392	1.1012	1.16942	0.0018	0.0397	0.0022	0.0207332	0.174802	0.0237743
SNOWBALL_030125_st	TRIP6	7.46819	7.69901	7.675	7.68579	-1.1735	-1.01678	-1.00921	0.0033	0.7246	0.8459	0.0316381	0.881268	0.938687
SNOWBALL_023340_st	CTSD	8.63301	8.8638	9.23264	9.33075	-1.17348	1.29131	1.38219	0.0018	< 0.001	< 0.001	0.0202399	0.000715972	8.78124e-05
SNOWBALL_017933_s_st	ACVR1	7.08105	7.3113	7.41117	7.3374	-1.17304	1.07168	1.01826	0.0011	0.1055	0.6599	0.0145396	0.321843	0.847105
SNOWBALL_006068_s_st	GBA	9.33775	9.5678	9.53524	9.47814	-1.17287	-1.02282	-1.06412	0.0003	0.5289	0.0953	0.00587489	0.767108	0.302825
SNOWBALL_034502_st	SCARA3	7.85138	8.08137	8.13495	8.11825	-1.17283	1.03784	1.0259	0.0012	0.3745	0.5383	0.0153463	0.649215	0.773597
SNOWBALL_002393_st	FBXL4	5.43991	5.66961	5.76371	5.67831	-1.17259	1.0674	1.00605	0.0018	0.1466	0.8895	0.0207474	0.390434	0.957089
SNOWBALL_018857_st	SPARC	11.575	11.8034	11.9623	12.0996	-1.17155	1.11639	1.22788	< 0.001	0.0021	< 0.001	0.00198789	0.022747	0.000223927
SNOWBALL_014834_s_st	MYH10	8.66632	8.89445	9.03651	8.78283	-1.17131	1.10348	-1.08044	0.0052	0.0609	0.1327	0.0434215	0.229569	0.36841
SNOWBALL_018647_st	C16H5orf51	8.24513	8.47254	8.72895	8.8939	-1.17074	1.1945	1.33919	0.0006	0.0002	< 0.001	0.00909266	0.00396754	5.86751e-05
SNOWBALL_013151_st	PTPN14	7.54216	7.76945	7.80044	7.79234	-1.17064	1.02172	1.01599	< 0.001	0.4911	0.6099	0.00230927	0.741027	0.818467
SNOWBALL_004898_st	LIMS1	8.26681	8.49354	8.5851	8.76664	-1.17018	1.06552	1.2084	0.0002	0.0675	< 0.001	0.00367868	0.244994	0.000856696
SNOWBALL_008874_st	FBXO42	7.22284	7.44944	7.73417	7.65828	-1.17008	1.21818	1.15576	0.0037	0.0006	0.0065	0.0344882	0.00912903	0.0511454
SNOWBALL_005501_st	RTN4	8.5553	8.78186	8.87246	8.7791	-1.17004	1.06481	-1.00192	0.0006	0.1088	0.9593	0.00932261	0.327765	0.984754
SNOWBALL_027796_st	FUCA1	8.22756	8.45391	8.66913	8.81949	-1.16987	1.16088	1.2884	0.0027	0.0039	< 0.001	0.0270367	0.0353138	0.00101135
SNOWBALL_005773_s_st	NCOA2	6.95319	7.17915	7.44489	7.54657	-1.16956	1.20225	1.29004	0.0051	0.0015	< 0.001	0.0430324	0.0180434	0.00197049
SNOWBALL_007320_st	C2CD5	6.03404	6.25894	6.3323	6.12638	-1.16869	1.05217	-1.09623	0.0015	0.2298	0.0384	0.0177156	0.502765	0.17122
SNOWBALL_008688_st		7.91423	8.1379	8.21501	8.29251	-1.1677	1.0549	1.11312	0.0032	0.2506	0.0295	0.0311277	0.527324	0.143655
SNOWBALL_020483_st	CHRDL1	9.9145	10.1376	10.1873	10.1066	-1.16723	1.03505	-1.02174	0.0002	0.298	0.5114	0.00384603	0.578136	0.755078
SNOWBALL_013017_st	GRB10	7.58841	7.81128	7.75565	7.66198	-1.16705	-1.03931	-1.10903	0.0003	0.2721	0.0076	0.00580274	0.550921	0.0568541
SNOWBALL_033077_st	FOXJ3	7.37173	7.59429	7.60664	7.59015	-1.1668	1.0086	-1.00288	0.0039	0.8542	0.9508	0.0358519	0.942216	0.98168
SNOWBALL_004958_st	DPY30	7.0771	7.29917	7.30613	7.36958	-1.1664	1.00483	1.05001	0.0026	0.9127	0.276	0.0267498	0.966741	0.555206
SNOWBALL_000133_st	MIEN1	8.4261	8.64774	8.84316	8.84551	-1.16606	1.14506	1.14692	0.0025	0.0061	0.0056	0.0258011	0.0488515	0.046201
SNOWBALL_020575_s_st	FHL1	7.97668	8.19771	8.19414	7.87231	-1.16556	-1.00248	-1.25301	0.002	0.9534	< 0.001	0.0222842	0.982591	0.00161031
SNOWBALL_017826_st	HERC2	5.45437	5.67528	5.78462	5.89329	-1.16546	1.07874	1.16313	0.0003	0.0378	0.0004	0.00563656	0.169189	0.00618015
SNOWBALL_001430_s_st	RXRB	5.80823	6.02879	5.80788	5.83749	-1.16518	-1.16546	-1.14179	0.0028	0.0028	0.0076	0.0281893	0.0279672	0.0566416
SNOWBALL_017775_st	ADAM9	9.40429	9.62439	9.90254	9.87281	-1.16481	1.21264	1.18791	0.003	0.0004	0.0011	0.0291083	0.00710516	0.0146056
SNOWBALL_007441_st	CCDC91	5.99803	6.21781	6.3407	6.3334	-1.16456	1.08891	1.08342	0.0049	0.0872	0.1059	0.0420993	0.286795	0.322531
SNOWBALL_015688_st	SKIL	7.61856	7.83795	8.029	8.03698	-1.16424	1.1416	1.14793	0.0022	0.0059	0.0045	0.0236176	0.0480279	0.039468
SNOWBALL_025092_s_st	BAP1	6.16783	6.38701	6.22393	6.16897	-1.16407	-1.11967	-1.16316	0.0054	0.0295	0.0056	0.0450583	0.143656	0.0461733
SNOWBALL_032109_st	DOCK9	4.41128	4.62835	4.71345	4.5053	-1.16237	1.06076	-1.08903	0.0003	0.0905	0.0191	0.00547009	0.293265	0.107343
SNOWBALL_019673_st	EXOC4	7.55793	7.77453	7.96477	8.01437	-1.16199	1.14095	1.18086	0.0006	0.0018	0.0002	0.00911718	0.0201518	0.00453505
SNOWBALL_007918_st	LOC102160609	7.84167	8.05747	8.22584	8.2332	-1.16134	1.12379	1.12954	0.0011	0.007	0.0053	0.0144666	0.0539843	0.0443179
SNOWBALL_012808_s_st	SGCE	8.2804	8.49484	8.64189	8.53352	-1.16025	1.10731	1.02718	0.0008	0.0124	0.4696	0.0115733	0.0800785	0.725414
SNOWBALL_018219_st	COL5A2	10.6197	10.834	10.9759	10.9636	-1.16012	1.10339	1.09397	0.0001	0.0046	0.0084	0.00309484	0.0400128	0.0609705
SNOWBALL_014039_st	FARP1	7.84134	8.05532	8.07803	7.9095	-1.15988	1.01586	-1.10636	0.0013	0.6844	0.0172	0.015816	0.860453	0.0997413
SNOWBALL_012429_st	AMOTL1	6.8309	7.04456	7.0618	7.28067	-1.15962	1.01202	1.17782	0.0003	0.7128	0.0001	0.00508844	0.875283	0.00243283
SNOWBALL_042564_st	RUFY3	5.7136	5.92701	6.02176	5.82415	-1.15943	1.06788	-1.07391	0.0044	0.1602	0.1294	0.0385393	0.410835	0.363025
SNOWBALL_018008_s_st	EPHA4	7.98969	8.20276	8.30706	8.23218	-1.15915	1.07497	1.0206	0.0048	0.1286	0.6574	0.0411679	0.361753	0.845749
SNOWBALL_023049_st	SGCE	8.4214	8.6343	8.86569	8.72562	-1.15902	1.17396	1.06534	0.0016	0.0008	0.1244	0.0189954	0.0115043	0.354581
SNOWBALL_012007_s_st	TMEM9B	8.8049	9.01739	9.14145	8.9972	-1.15869	1.0898	-1.01409	0.0011	0.0333	0.7099	0.0138485	0.155947	0.873778
SNOWBALL_006702_st	ATXN10	6.55162	6.76231	6.78066	6.7794	-1.15724	1.0128	1.01191	0.0014	0.7405	0.7579	0.0166467	0.889368	0.897825
SNOWBALL_004055_st	SLC25A51	7.90197	8.11251	8.2161	8.24803	-1.15712	1.07444	1.09849	0.0004	0.0445	0.0115	0.00704321	0.188152	0.0760431
SNOWBALL_008086_st	GPI	9.5204	9.73026	9.90428	9.86644	-1.15657	1.1282	1.09899	0.0003	0.0016	0.0091	0.00569345	0.0187781	0.0646791
SNOWBALL_010990_st	DYNC1H1	7.94568	8.15332	8.11425	8.10438	-1.1548	-1.02745	-1.0345	0.0051	0.5506	0.4562	0.0432622	0.781497	0.715383
SNOWBALL_010374_st	LOC102167410	6.28803	6.49554	6.81029	6.83094	-1.1547	1.24379	1.26173	0.0027	< 0.001	< 0.001	0.0273114	0.00170228	0.0010204
SNOWBALL_003071_st	DAAM1	6.81937	7.02624	7.28136	7.11684	-1.15418	1.19344	1.06481	0.0025	0.0004	0.1365	0.0258411	0.00721554	0.374529
SNOWBALL_013235_st	KCTD3	8.0169	8.22278	8.27327	8.1383	-1.15339	1.03562	-1.0603	0.0006	0.3087	0.0977	0.00878629	0.588631	0.307428
SNOWBALL_020903_s_st	TMBIM6	9.82434	10.0302	10.2534	10.2259	-1.15337	1.16733	1.14526	0.0005	0.0002	0.0007	0.00748428	0.00425412	0.010442
SNOWBALL_022383_st	ANTXR2	7.89187	8.09674	8.25943	8.23827	-1.15258	1.11937	1.10307	0.006	0.0232	0.0442	0.0485694	0.122107	0.187249
SNOWBALL_026603_st	LOC100623720	10.7708	10.9739	11.1344	11.0678	-1.1512	1.11765	1.06719	0.0009	0.0056	0.0797	0.0125534	0.045831	0.271285
SNOWBALL_025487_st		7.71811	7.92093	8.20115	8.20242	-1.15095	1.21438	1.21545	0.0004	< 0.001	< 0.001	0.00692677	0.000571081	0.000549539
SNOWBALL_036995_st	B3GNT9	7.64788	7.85025	7.99443	8.16492	-1.15059	1.10511	1.24373	0.0043	0.0308	< 0.001	0.0381849	0.148078	0.00231038
SNOWBALL_014728_st	MYH10	9.27501	9.47679	9.61352	9.38418	-1.15012	1.09941	-1.0663	0.0006	0.0108	0.0687	0.00924336	0.0729378	0.247636
SNOWBALL_030088_st	USP25	8.20157	8.40328	8.54059	8.57484	-1.15006	1.09985	1.12627	0.003	0.0304	0.0091	0.0297254	0.146718	0.0645265
SNOWBALL_010777_st	TM9SF1	7.73803	7.9391	7.96905	8.02925	-1.14955	1.02097	1.06448	0.0005	0.5258	0.0686	0.00790175	0.765008	0.247413
SNOWBALL_011695_st	LOC100623192	6.6167	6.81739	6.79987	6.75954	-1.14924	-1.01221	-1.04091	0.0041	0.7739	0.3488	0.0367956	0.905286	0.626247
SNOWBALL_022337_s_st	RALB	7.03727	7.23693	7.39523	7.20955	-1.14843	1.11597	-1.01917	0.0035	0.0152	0.6446	0.032661	0.091906	0.838562
SNOWBALL_025273_s_st	SLC3A2	9.03196	9.23135	9.2886	9.4148	-1.14821	1.04048	1.1356	0.006	0.3763	0.0101	0.048043	0.650703	0.0694006
SNOWBALL_014905_st	GABARAP	9.36252	9.56179	9.80791	9.84911	-1.14812	1.18601	1.22037	0.0011	0.0002	< 0.001	0.0146401	0.00355466	0.0010657
SNOWBALL_040591_st	SCARA3	9.9756	10.1747	10.1899	10.0678	-1.14801	1.01057	-1.07691	0.0004	0.7419	0.0312	0.0073673	0.890056	0.149095
SNOWBALL_047736_st	MICAL2	5.63909	5.83722	5.79481	5.77285	-1.14721	-1.02983	-1.04563	0.001	0.4055	0.213	0.013758	0.675127	0.481974
SNOWBALL_026602_st	LOC100623720	8.85483	9.0521	9.20666	9.21011	-1.14652	1.11308	1.11574	0.0019	0.0102	0.0089	0.020958	0.0697581	0.0635509
SNOWBALL_002945_st	KIAA2026	7.27348	7.47049	7.45468	7.35111	-1.14632	-1.01102	-1.08627	0.0037	0.789	0.0565	0.0344606	0.912557	0.219138
SNOWBALL_027057_st	COL5A2	10.7175	10.9145	11.0042	11.0067	-1.14631	1.06418	1.06599	0.0012	0.0929	0.085	0.0153008	0.298249	0.282415
SNOWBALL_014187_st	ACOX1	9.12872	9.32536	9.58077	9.62489	-1.14602	1.19368	1.23074	0.001	< 0.001	< 0.001	0.0135943	0.00221301	0.000606681
SNOWBALL_014016_st	MYCBP2	7.89468	8.09124	8.11849	7.93152	-1.14596	1.01907	-1.11707	0.0018	0.6109	0.0078	0.0201845	0.81912	0.0579331
SNOWBALL_005147_st	USP34	7.75699	7.95099	8.08629	8.05756	-1.14393	1.09832	1.07666	0.0016	0.0174	0.053	0.0183461	0.100583	0.210227
SNOWBALL_003594_st	TSC1	5.37909	5.57305	5.47788	5.70869	-1.1439	-1.06819	1.09858	0.0056	0.1359	0.0398	0.0458857	0.373636	0.175049
SNOWBALL_014278_st	UBTF	7.28432	7.47806	7.56159	7.56054	-1.14372	1.05961	1.05884	0.0015	0.1175	0.1219	0.0174592	0.34308	0.350445
SNOWBALL_002491_st	CTIF	7.50685	7.70024	7.79254	7.7834	-1.14344	1.06607	1.05934	0.0033	0.1195	0.1577	0.0317045	0.346279	0.407203
SNOWBALL_013517_st	RSU1	10.0254	10.2183	10.3645	10.2077	-1.14309	1.10659	-1.00739	0.0003	0.0029	0.8014	0.00507815	0.0283961	0.91852
SNOWBALL_010071_st	ZFAND3	8.21814	8.40999	8.59639	8.64191	-1.14223	1.13792	1.17439	0.0046	0.0056	0.0011	0.0400429	0.0459855	0.0140189
SNOWBALL_008643_st	RNF11	7.43577	7.62709	7.69164	7.78832	-1.14181	1.04576	1.11824	0.0057	0.2983	0.0163	0.0468261	0.57842	0.0961644
SNOWBALL_001735_s_st	PGK1	9.68329	9.872	10.0333	10.0092	-1.13974	1.11832	1.09981	0.0008	0.0029	0.0086	0.0114368	0.0284245	0.0621933
SNOWBALL_021460_st	LIG3	5.7438	5.93227	5.92671	5.94599	-1.13956	-1.00386	1.00956	0.0006	0.9017	0.7609	0.00925141	0.962245	0.899178
SNOWBALL_007313_s_st	DCTN2	7.87838	8.06675	8.226	8.25482	-1.13948	1.1167	1.13924	0.0019	0.0063	0.0019	0.0208371	0.0497061	0.0210255
SNOWBALL_018753_st	ANXA6	8.00822	8.19651	8.44978	8.24215	-1.13941	1.1919	1.03214	0.0006	< 0.001	0.3175	0.00918902	0.00102425	0.597262
SNOWBALL_022296_s_st	RRBP1	8.10182	8.28935	8.37356	8.423	-1.13881	1.06011	1.09707	0.0024	0.1259	0.0209	0.0252453	0.357204	0.113777
SNOWBALL_044324_s_st	TRIOBP	8.90603	9.09328	9.13229	9.15951	-1.13859	1.02741	1.04698	0.0055	0.5132	0.2729	0.0452198	0.756295	0.551809
SNOWBALL_015227_st	ANO10	7.9413	8.12837	8.46014	8.39578	-1.13845	1.25855	1.20365	0.0036	< 0.001	0.0002	0.0335689	0.000648969	0.00359464
SNOWBALL_005967_st	UCK2	9.17347	9.35995	9.21664	9.13742	-1.13799	-1.10444	-1.16679	0.0063	0.028	0.0017	0.0497609	0.138567	0.0198603
SNOWBALL_000698_st	ADAM17	7.03403	7.21971	7.05614	7.22212	-1.13736	-1.12006	1.00167	0.0006	0.0018	0.9566	0.00923539	0.020041	0.983775
SNOWBALL_040115_st	LTN1	3.41458	3.5995	3.52669	3.51639	-1.13675	-1.05176	-1.0593	0.001	0.1334	0.09	0.0132759	0.369542	0.292311
SNOWBALL_009995_st	MRPL14	5.44709	5.63004	5.52671	5.63712	-1.1352	-1.07425	1.00492	0.0012	0.0419	0.8814	0.0154568	0.180888	0.953781
SNOWBALL_016606_s_st	RNF10	8.80762	8.98829	9.17922	9.24812	-1.13341	1.1415	1.19734	< 0.001	< 0.001	< 0.001	0.000923543	0.000579089	3.50894e-05
SNOWBALL_026601_st	COL6A2	10.2325	10.4129	10.6188	10.5894	-1.13314	1.15345	1.13015	0.0015	0.0005	0.0017	0.0175737	0.00764087	0.0199004
SNOWBALL_016228_st	TTC3	8.30114	8.47943	8.59344	8.55456	-1.13154	1.08223	1.05345	0.0013	0.0239	0.1196	0.0158098	0.124651	0.346581
SNOWBALL_007165_st	DNM1L	7.77708	7.95453	8.10473	8.11303	-1.13088	1.10973	1.11613	0.0051	0.0145	0.0106	0.0433949	0.088927	0.0718014
SNOWBALL_005049_st	EXOC6B	6.54798	6.72536	7.00585	7.11878	-1.13082	1.21461	1.3135	0.0028	< 0.001	< 0.001	0.0280019	0.00126569	6.42682e-05
SNOWBALL_017685_s_st		6.85984	7.03606	6.87618	6.85241	-1.12991	-1.11719	-1.13575	0.0032	0.0062	0.0023	0.0305426	0.0494963	0.0244606
SNOWBALL_028706_st	PLXNA2	8.04534	8.22106	8.06483	8.07284	-1.12953	-1.11437	-1.1082	0.0023	0.0054	0.0076	0.0244507	0.0448753	0.0570415
SNOWBALL_025368_st	CGGBP1	8.37028	8.54545	8.67943	8.71505	-1.12909	1.09732	1.12475	0.0052	0.025	0.0064	0.0436848	0.128445	0.0507529
SNOWBALL_023357_st	SELENON	7.79101	7.96598	8.07448	8.14828	-1.12894	1.07811	1.1347	0.0046	0.0583	0.0035	0.0402589	0.223376	0.032685
SNOWBALL_025271_s_st	PTGDS	4.95542	5.12769	4.97603	4.83536	-1.12683	-1.11084	-1.22462	0.0058	0.0127	< 0.001	0.0468866	0.081373	0.00162967
SNOWBALL_020214_st	LOC100523107	6.97576	7.14769	7.36253	7.2972	-1.12656	1.16058	1.10919	0.0047	0.0008	0.0116	0.0409545	0.0117676	0.0763332
SNOWBALL_002314_st	PHF3	7.62543	7.79718	7.92987	7.95311	-1.12642	1.09634	1.11414	0.003	0.0159	0.0059	0.0295965	0.0945195	0.0480249
SNOWBALL_007171_st	LRP6	7.37555	7.54566	7.74754	7.66083	-1.12515	1.1502	1.0831	0.0006	0.0001	0.0108	0.00915554	0.00272891	0.0727558
SNOWBALL_017268_s_st	LOC100518212	8.11245	8.28221	8.52766	8.67962	-1.12487	1.18546	1.31713	0.0028	0.0001	< 0.001	0.0277533	0.00251697	3.78383e-05
SNOWBALL_006988_s_st	MYL6	10.3719	10.5409	10.6645	10.5226	-1.12428	1.08948	-1.01276	0.0005	0.0059	0.645	0.0081232	0.0477938	0.838802
SNOWBALL_007496_st	ALDH1L2	2.79217	2.96009	3.18985	3.28582	-1.12344	1.17264	1.2533	0.0018	0.0001	< 0.001	0.02077	0.00257248	0.000134573
SNOWBALL_002930_st	ZNF106	7.23606	7.40372	7.42777	7.55291	-1.12324	1.01681	1.10895	0.0037	0.6323	0.008	0.0339657	0.831615	0.0591753
SNOWBALL_004902_st	GNPTG	7.27029	7.4375	7.46952	7.44263	-1.12288	1.02244	1.00356	0.0044	0.5341	0.9202	0.0385007	0.770638	0.969928
SNOWBALL_046869_st	DYNC1H1	8.59452	8.76146	8.76622	8.69251	-1.12268	1.0033	-1.04895	0.0005	0.9028	0.0908	0.00787497	0.962628	0.293915
SNOWBALL_047768_st	LOC100513490	7.036	7.20185	7.34139	7.38988	-1.12183	1.10155	1.13921	0.0046	0.0138	0.0018	0.0403311	0.0858402	0.0206512
SNOWBALL_014511_st	VEZF1	8.46222	8.6275	8.64763	8.50027	-1.12138	1.01405	-1.09219	0.0034	0.6809	0.0176	0.0320737	0.858615	0.101356
SNOWBALL_008176_st	LOC100624411	11.1088	11.2728	11.3718	11.3562	-1.12033	1.07103	1.05954	0.0062	0.0752	0.1282	0.0492681	0.261949	0.361128
SNOWBALL_023800_st	RRBP1	9.48967	9.65334	9.82236	9.85874	-1.12014	1.12429	1.153	0.001	0.0008	0.0001	0.0132683	0.0108726	0.00279042
SNOWBALL_012974_st	RPS6KC1	7.61447	7.77702	7.94484	7.82707	-1.11926	1.12336	1.0353	0.0008	0.0006	0.222	0.0112092	0.00913394	0.493183
SNOWBALL_007838_s_st	PIEZO1	7.4055	7.56797	7.5588	7.53989	-1.11921	-1.00638	-1.01966	0.0016	0.8328	0.5206	0.0184381	0.932778	0.761419
SNOWBALL_011104_s_st	DYNC1H1	8.45813	8.62043	8.64417	8.62489	-1.11907	1.01659	1.0031	0.0012	0.5752	0.9158	0.0155831	0.797184	0.968061
SNOWBALL_018400_st	PPP1R7	8.05234	8.21339	8.33169	8.37563	-1.1181	1.08545	1.11902	0.0002	0.0028	0.0002	0.0039806	0.0279157	0.0037724
SNOWBALL_002669_st	SLC30A4	10.8235	10.9845	11.0668	11.1204	-1.11803	1.0587	1.09879	0.0031	0.0946	0.0097	0.0303239	0.301647	0.0676276
SNOWBALL_017792_st	PLPP5	6.91116	7.07071	7.2039	7.35812	-1.11694	1.09671	1.22045	0.0021	0.0075	< 0.001	0.0228102	0.0565294	0.00030527
SNOWBALL_018556_st	BASP1	9.7026	9.86196	9.6918	9.57023	-1.11679	-1.12518	-1.2241	0.0013	0.0007	< 0.001	0.0161417	0.0107872	0.000153782
SNOWBALL_017680_st		6.62686	6.78603	6.7806	6.82005	-1.11665	-1.00378	1.02386	0.004	0.9102	0.4838	0.0364395	0.965662	0.735713
SNOWBALL_008882_st	ZNF521	6.79038	6.94903	6.81349	6.73111	-1.11625	-1.0985	-1.16306	0.0017	0.0054	< 0.001	0.0195581	0.0449383	0.00230729
SNOWBALL_030539_st	PTPN13	9.91221	10.0707	10.2611	10.1783	-1.11612	1.1411	1.07744	0.0018	0.0004	0.0221	0.020475	0.00649598	0.118316
SNOWBALL_019514_st	ELMO2	7.26997	7.42711	7.59176	7.5678	-1.11507	1.1209	1.10243	0.0039	0.0028	0.0081	0.0354893	0.0277346	0.0597464
SNOWBALL_002264_s_st	LOC110258728,LOC110258727	8.99199	9.14593	9.33236	9.4416	-1.11261	1.13795	1.22745	0.0052	0.0012	< 0.001	0.0434142	0.015338	0.000510156
SNOWBALL_015533_st	FNDC3B	9.37206	9.52527	9.72652	9.67657	-1.11204	1.1497	1.11058	0.0025	0.0002	0.0028	0.0260313	0.00469888	0.0278539
SNOWBALL_026910_st	LSM12	7.53026	7.68213	7.80259	7.73575	-1.11101	1.08708	1.03786	0.0042	0.0176	0.2561	0.0374653	0.101466	0.533338
SNOWBALL_004907_st	FAM120A	8.21628	8.36493	8.47894	8.55452	-1.10853	1.08223	1.14044	0.0019	0.0119	0.0002	0.0214672	0.0775375	0.00452679
SNOWBALL_014523_st	AP2B1	8.76571	8.9138	9.05148	8.94375	-1.1081	1.10013	1.02097	0.0031	0.0052	0.4916	0.0300255	0.0434825	0.741318
SNOWBALL_041160_st	PTPN13	8.75254	8.89817	9.00177	8.89693	-1.10622	1.07445	-1.00086	0.003	0.0245	0.9767	0.0296365	0.126794	0.991151
SNOWBALL_011182_st	DYNC1H1	8.21447	8.35995	8.39248	8.32482	-1.10611	1.0228	-1.02465	0.0019	0.4178	0.3822	0.0208482	0.685159	0.655651
SNOWBALL_000440_s_st		7.80612	7.94722	8.00412	7.97791	-1.10274	1.04023	1.0215	0.0053	0.2125	0.4937	0.0445979	0.481282	0.742825
SNOWBALL_017886_s_st	TLK1	8.13642	8.27744	8.27207	8.21542	-1.10268	-1.00373	-1.04392	0.0047	0.9022	0.1685	0.0407543	0.962409	0.422501
SNOWBALL_004026_st	RAD23B	9.11232	9.23963	9.19949	9.15552	-1.09225	-1.02821	-1.06003	< 0.001	0.1095	0.0027	0.00170038	0.328972	0.0269688
SNOWBALL_000331_st	DLG5	7.52381	7.64749	7.66714	7.73601	-1.08951	1.01371	1.06328	0.0024	0.5759	0.0204	0.0252837	0.797669	0.112274
SNOWBALL_006953_s_st	MYL6	11.6242	11.7477	11.8314	11.7022	-1.08936	1.05976	-1.03206	0.0036	0.0343	0.2265	0.0333896	0.158893	0.49879
SNOWBALL_014395_st	KANSL1	7.98274	8.10549	8.17528	8.17673	-1.08881	1.04957	1.05062	0.0053	0.0856	0.0799	0.0444698	0.28371	0.271729
SNOWBALL_012954_st	LAMC1	9.93493	10.0564	9.97486	9.85916	-1.08783	-1.05813	-1.14649	0.0029	0.0316	< 0.001	0.0287623	0.150359	0.00106163
SNOWBALL_016204_s_st	GSK3B	8.55837	8.67699	8.72987	8.64823	-1.0857	1.03733	-1.02014	0.0023	0.1262	0.3931	0.0243679	0.357713	0.664939
SNOWBALL_011978_st	DENND5A	7.37019	7.48784	7.48853	7.39545	-1.08496	1.00048	-1.06613	0.0024	0.9834	0.0122	0.0252685	0.993715	0.0792138
SNOWBALL_014349_st	RAB5C	8.48824	8.6047	8.56292	8.52136	-1.08407	-1.02938	-1.05947	0.0055	0.2672	0.0357	0.0456107	0.545665	0.163163
SNOWBALL_018318_s_st	HDLBP	9.42215	9.53842	9.61898	9.68564	-1.08393	1.05743	1.10744	0.0022	0.0229	0.0003	0.0238629	0.121044	0.00543542
SNOWBALL_004501_st	NSMCE1	8.19324	8.29852	8.45775	8.41165	-1.0757	1.11669	1.08157	0.0044	0.0001	0.0026	0.0390219	0.00293886	0.0268134
SNOWBALL_015014_st	PRPF8	8.56954	8.48414	8.47982	8.62665	1.06098	-1.003	1.10382	0.0006	0.8335	< 0.001	0.00963079	0.933063	0.00016744
SNOWBALL_018784_st	LARP1	9.84461	9.74803	9.70801	9.62607	1.06924	-1.02813	-1.08821	0.0042	0.1865	0.0007	0.0377479	0.447662	0.00993281
SNOWBALL_002398_st	ANXA2	12.2084	12.1075	12.1154	11.9756	1.07243	1.00547	-1.09572	0.0042	0.7978	0.0005	0.0374837	0.916828	0.00783504
SNOWBALL_002383_st	ZNF609	7.23525	7.12362	7.08077	6.9764	1.08045	-1.03015	-1.10743	0.0045	0.2225	0.0005	0.0392083	0.49376	0.00784217
SNOWBALL_022839_st	LOC110256601	10.1176	10.0043	9.90343	9.82681	1.08169	-1.07242	-1.13092	0.0003	0.0008	< 0.001	0.00509624	0.0110841	0.000126194
SNOWBALL_010592_s_st	PKM	11.4735	11.3518	11.3943	11.2719	1.08807	1.02993	-1.05696	0.0014	0.1983	0.0227	0.0173421	0.463287	0.120406
SNOWBALL_022840_st	ARF3	7.70831	7.584	7.59769	7.52058	1.08999	1.00954	-1.04494	0.004	0.7159	0.1055	0.0359678	0.876889	0.321752
SNOWBALL_009902_s_st		8.49681	8.36957	8.42496	8.46624	1.09221	1.03914	1.06931	< 0.001	0.0315	0.0008	0.00160518	0.150072	0.0114271
SNOWBALL_010188_s_st	CHD8	6.43191	6.30393	6.41336	6.42855	1.09276	1.0788	1.09022	0.0046	0.0125	0.0055	0.0402135	0.0804073	0.0457021
SNOWBALL_017916_st	SAP130	8.00008	7.86998	7.83006	7.80371	1.09437	-1.02805	-1.047	0.0046	0.3275	0.113	0.040043	0.606598	0.335178
SNOWBALL_014712_st	KPNB1	10.2182	10.0867	10.1736	10.0579	1.0954	1.06205	-1.02016	0.0019	0.026	0.428	0.0211073	0.132068	0.693513
SNOWBALL_013575_st	GDI2	9.65486	9.52276	9.46164	9.41131	1.09589	-1.04327	-1.08031	0.0003	0.0499	0.0014	0.00556878	0.202439	0.0166741
SNOWBALL_029560_st	LOC110260088	9.08594	8.95279	8.92565	8.88478	1.09668	-1.01899	-1.04827	0.0011	0.4316	0.0603	0.0144908	0.696324	0.228132
SNOWBALL_007797_s_st	TXNRD1	9.33588	9.2024	8.82763	8.80142	1.09694	-1.29663	-1.3204	0.0051	< 0.001	< 0.001	0.0432592	1.50316e-05	7.85854e-06
SNOWBALL_010727_s_st	SUPT16H	8.44709	8.31233	8.34098	8.46055	1.09791	1.02006	1.1082	0.0032	0.4723	0.0015	0.0309439	0.727324	0.0182411
SNOWBALL_026052_s_st	SURF4	8.57009	8.43467	8.3409	8.20757	1.09841	-1.06716	-1.17048	0.0042	0.0346	< 0.001	0.0375812	0.159961	0.00124255
SNOWBALL_019787_st	LOC110257802	9.09617	8.959	8.73198	8.578	1.09975	-1.17042	-1.30224	0.0042	< 0.001	< 0.001	0.0373686	0.00137156	1.25112e-05
SNOWBALL_004953_st	LRPPRC	8.51057	8.37214	8.28792	8.28908	1.10071	-1.06011	-1.05926	0.0031	0.0505	0.0534	0.0302767	0.203899	0.211166
SNOWBALL_020143_st	ANKS1B,LOC110260815	7.88816	7.74873	7.75206	7.79316	1.10147	1.00231	1.03128	0.0061	0.9408	0.3295	0.0489353	0.977912	0.608567
SNOWBALL_000804_st	UBR5	8.1674	8.02633	8.03285	7.84564	1.10272	1.00453	-1.13343	0.0055	0.8842	0.0008	0.0456578	0.954882	0.0116135
SNOWBALL_020295_st	GNL3L	7.53231	7.39073	7.38935	7.42355	1.10312	-1.00096	1.02301	0.0035	0.9738	0.4399	0.0331738	0.990156	0.702862
SNOWBALL_006913_st	TUBA1B	11.5321	11.3903	11.4192	11.3202	1.10328	1.02026	-1.04981	0.0005	0.3896	0.0478	0.00816205	0.661903	0.196898
SNOWBALL_010863_s_st	PKM	12.573	12.4301	12.525	12.4479	1.10409	1.06794	1.0124	0.0041	0.0412	0.6829	0.0370266	0.179075	0.859686
SNOWBALL_018876_st	NSUN2	8.2446	8.09997	7.99388	7.97487	1.10545	-1.07631	-1.09059	0.001	0.0097	0.0032	0.0135543	0.0674881	0.0309525
SNOWBALL_020114_st	MED14	8.2621	8.11747	8.07083	8.01877	1.10545	-1.03286	-1.07081	0.0033	0.2815	0.0314	0.0312139	0.561007	0.149788
SNOWBALL_021718_s_st	LOC100519046	8.52455	8.37913	8.30704	8.18039	1.10605	-1.05125	-1.1477	0.002	0.087	0.0001	0.0222932	0.286421	0.00285262
SNOWBALL_006530_st	ATP1A1	10.6974	10.5506	10.3766	10.2696	1.10709	-1.12822	-1.21505	0.0039	0.001	< 0.001	0.0356411	0.0136821	0.000371279
SNOWBALL_024695_s_st	LOC110261396	10.0458	9.89679	9.8614	9.68348	1.1088	-1.02483	-1.15934	0.0035	0.4277	0.0002	0.0326767	0.693217	0.00341363
SNOWBALL_009365_st	SERBP1	9.50324	9.35395	9.29575	9.30812	1.10902	-1.04116	-1.03228	0.0012	0.1434	0.2431	0.0147133	0.385432	0.51871
SNOWBALL_018574_s_st	RAI14	9.89141	9.74022	9.8912	9.99783	1.11049	1.11032	1.1955	0.006	0.006	< 0.001	0.0481045	0.0483939	0.00164516
SNOWBALL_013334_st	LOC110258604	8.3854	8.23412	8.1188	8.12176	1.11056	-1.08321	-1.081	0.0019	0.0123	0.0143	0.0215359	0.0796196	0.0881426
SNOWBALL_027039_st	EIF4G1	9.8156	9.66245	9.68299	9.6086	1.112	1.01434	-1.03803	0.0001	0.5172	0.1017	0.00324516	0.759128	0.314779
SNOWBALL_009353_s_st	UBR4	8.73319	8.57889	8.71862	8.74772	1.11288	1.1017	1.12415	0.0006	0.0013	0.0002	0.00880661	0.0163455	0.00476058
SNOWBALL_014386_st		7.70679	7.55103	7.42986	7.25138	1.11401	-1.08762	-1.23085	0.0024	0.0129	< 0.001	0.0252326	0.0821558	0.00019977
SNOWBALL_004413_s_st	LOC100521482	8.73551	8.57925	8.43341	8.43835	1.1144	-1.10637	-1.10259	0.0051	0.0081	0.01	0.0433003	0.0594025	0.0689231
SNOWBALL_013022_st	SMG7	7.82119	7.66453	7.67357	7.79124	1.11471	1.00629	1.0918	0.0029	0.8421	0.0119	0.0288468	0.936769	0.0776871
SNOWBALL_006999_st	LOC100739361	9.93543	9.77747	9.67877	9.45377	1.1157	-1.07081	-1.25154	0.0005	0.0154	< 0.001	0.00807261	0.0924692	1.88677e-05
SNOWBALL_003355_s_st	VCP	8.94889	8.78931	8.8034	8.73598	1.11696	1.00982	-1.03765	0.0005	0.7047	0.1639	0.00775962	0.871137	0.41605
SNOWBALL_019272_st	LOC110255404	8.64661	8.48696	8.42827	8.25911	1.11702	-1.04151	-1.17109	0.0016	0.1839	< 0.001	0.0190762	0.44413	0.00165873
SNOWBALL_013626_s_st	USP6NL	7.28775	7.12768	7.06548	7.00106	1.11734	-1.04406	-1.09173	0.0023	0.1781	0.0112	0.0241841	0.436154	0.0744952
SNOWBALL_005738_st	YWHAZ	11.0695	10.9092	10.9061	10.7576	1.11757	-1.00211	-1.11078	0.0015	0.9432	0.0023	0.0177655	0.978756	0.0244846
SNOWBALL_025775_st	PSMD2	8.84121	8.67994	8.59464	8.63385	1.11827	-1.06091	-1.03246	0.0004	0.0302	0.217	0.00636752	0.145926	0.4872
SNOWBALL_021692_s_st	MED28	7.3811	7.21855	7.14735	7.02491	1.11927	-1.05059	-1.14365	0.0029	0.1439	0.0007	0.0288018	0.386166	0.0103474
SNOWBALL_000805_s_st	UBR5	8.01039	7.84733	7.74376	7.61085	1.11966	-1.07443	-1.17812	0.0058	0.0604	0.0003	0.0471691	0.228347	0.00532115
SNOWBALL_019097_st	SEC23B	8.20578	8.04012	8.01653	8.06641	1.12168	-1.01649	1.01839	0.0005	0.5434	0.4989	0.00784716	0.776842	0.746292
SNOWBALL_007760_st	METAP2	8.69593	8.5302	8.47327	8.41309	1.12173	-1.04024	-1.08455	0.0046	0.2748	0.0335	0.040032	0.553883	0.156294
SNOWBALL_012105_st	TIMM10B	6.53533	6.36882	6.3466	6.57003	1.12234	-1.01552	1.14966	0.0061	0.679	0.0015	0.0487039	0.857569	0.0179605
SNOWBALL_004691_st	GLYR1,ROGDI	8.91055	8.74313	8.76441	8.77994	1.12305	1.01486	1.02585	0.0062	0.6939	0.4982	0.0492238	0.865587	0.745761
SNOWBALL_009389_st	SRSF11	8.46835	8.30088	8.26598	8.32233	1.12309	-1.02449	1.01498	0.0006	0.3908	0.5952	0.00953167	0.662932	0.809427
SNOWBALL_015286_st	CTNNB1	9.77383	9.60628	9.542	9.34645	1.12315	-1.04556	-1.19734	0.004	0.2161	< 0.001	0.0363382	0.486077	0.00218132
SNOWBALL_004536_st	XPO6	8.69941	8.53138	8.54011	8.36434	1.12352	1.00607	-1.12275	0.0008	0.8327	0.0008	0.0111878	0.932762	0.0116072
SNOWBALL_042612_st	ATP2A2	6.54872	6.38051	6.37292	6.50628	1.12366	-1.00527	1.09109	0.0053	0.8863	0.0283	0.0443213	0.955783	0.139717
SNOWBALL_013324_st	HNRNPU	9.62364	9.455	9.55705	9.58347	1.124	1.0733	1.09313	< 0.001	0.0042	0.0007	0.00140165	0.0375792	0.01007
SNOWBALL_005385_st	HADHA	9.12105	8.95204	8.69022	8.55318	1.12429	-1.19899	-1.31846	0.0056	0.0001	< 0.001	0.0458816	0.0031563	8.94353e-05
SNOWBALL_007359_st	CCT2	9.66305	9.49125	9.52106	9.56807	1.12647	1.02088	1.05469	< 0.001	0.3777	0.0327	0.00210606	0.651869	0.153944
SNOWBALL_010365_s_st	PDE8A	8.37757	8.20547	8.22739	8.25773	1.1267	1.01531	1.03689	< 0.001	0.522	0.1382	0.0024122	0.76243	0.37734
SNOWBALL_003399_st	ANP32B	9.91176	9.73882	9.4914	9.43393	1.12736	-1.18708	-1.23533	0.0021	< 0.001	< 0.001	0.0227834	0.00207316	0.00036817
SNOWBALL_004526_st	THSD7B,LOC100524402	9.2145	9.04091	9.0664	9.08162	1.12787	1.01783	1.02862	< 0.001	0.3233	0.1232	0.00019475	0.602749	0.352711
SNOWBALL_005768_st	NUDCD1	7.98231	7.80806	7.72746	7.621	1.12838	-1.05746	-1.13844	0.0029	0.1234	0.0017	0.0284452	0.352913	0.0191835
SNOWBALL_017487_st	LOC100155517	10.3944	10.2201	10.2301	10.1388	1.12843	1.00701	-1.05793	0.0003	0.7938	0.0477	0.00543494	0.91491	0.196757
SNOWBALL_019317_st	NOP56	9.15481	8.98033	8.90006	9.00009	1.12856	-1.05722	1.01379	0.0016	0.1007	0.6737	0.0188399	0.312872	0.854755
SNOWBALL_005103_st	HADHB	8.37317	8.19854	7.97849	7.88372	1.12868	-1.16477	-1.24386	0.0025	0.0004	< 0.001	0.0261734	0.00633305	0.000377295
SNOWBALL_003030_st	EID1	7.0167	6.84059	6.81345	6.95462	1.12983	-1.019	1.08224	0.0035	0.6056	0.0418	0.0331631	0.815941	0.180792
SNOWBALL_024892_s_st	HIF1AN	8.2865	8.11024	8.23797	8.29398	1.12995	1.09257	1.13583	0.0061	0.0361	0.0046	0.0488515	0.164223	0.0400809
SNOWBALL_005116_st	LOC110257041,LOC110256915	7.7252	7.54844	7.49085	7.40911	1.13035	-1.04073	-1.10139	0.0023	0.2551	0.0114	0.0242187	0.532238	0.0756581
SNOWBALL_013273_st	AHCTF1	8.37677	8.19983	8.20131	8.19984	1.13048	1.00103	1.00001	0.0006	0.9719	0.9997	0.00900827	0.989452	0.999883
SNOWBALL_018143_s_st	SSFA2	7.14135	6.96334	7.07218	7.06908	1.13132	1.07836	1.07605	0.0046	0.0616	0.0685	0.0403057	0.231233	0.247319
SNOWBALL_034412_st	SMG7	6.94397	6.76567	6.9105	6.96373	1.13156	1.1056	1.14715	0.0011	0.0054	0.0005	0.014527	0.0449996	0.00744322
SNOWBALL_023146_st	ELOVL5	8.27676	8.09706	8.10258	7.9819	1.13265	1.00384	-1.08309	0.0057	0.9231	0.0579	0.0467556	0.971137	0.222567
SNOWBALL_022315_s_st	EIF4H	9.94081	9.76085	9.6679	9.58817	1.13285	-1.06655	-1.12715	< 0.001	0.0029	< 0.001	0.000235892	0.0288143	0.000339646
SNOWBALL_008150_st	LOC100522678	8.46732	8.28679	8.24169	8.24828	1.1333	-1.03175	-1.02705	0.0008	0.3215	0.3953	0.0117676	0.60104	0.666862
SNOWBALL_026935_st	AIMP1	7.94634	7.76462	7.8219	7.78258	1.13423	1.0405	1.01252	0.0045	0.3131	0.7483	0.0393364	0.592962	0.893199
SNOWBALL_010710_st	FURIN	7.72966	7.54794	7.4746	7.42681	1.13424	-1.05215	-1.08759	0.0062	0.2215	0.0518	0.049226	0.492607	0.20724
SNOWBALL_002244_st	ORC3	6.94923	6.76684	6.6996	6.49425	1.13476	-1.0477	-1.20797	0.0048	0.2452	0.0002	0.0411859	0.521022	0.00348628
SNOWBALL_006488_st	RBM8A	8.49748	8.31439	8.08171	8.11328	1.13531	-1.17502	-1.14958	0.003	0.0004	0.0015	0.0296741	0.00700621	0.0175645
SNOWBALL_010646_st	DDX24	7.22661	7.04332	7.00085	6.92423	1.13547	-1.02987	-1.08605	0.0042	0.4506	0.0455	0.0373673	0.7111	0.19078
SNOWBALL_031158_st	UGDH	8.59355	8.41	8.3369	8.20573	1.13567	-1.05198	-1.1521	0.0044	0.2063	0.002	0.0391105	0.473658	0.0221323
SNOWBALL_019775_st	WASL	7.20237	7.01871	7.11579	7.11402	1.13576	1.06961	1.06829	0.003	0.083	0.0882	0.0292801	0.278171	0.288806
SNOWBALL_026255_s_st	STRAP	7.78174	7.59733	7.75879	7.85574	1.13636	1.11842	1.19617	0.0001	0.0004	< 0.001	0.00281922	0.00730028	0.000167401
SNOWBALL_006026_st	FAM13B	6.79105	6.60501	6.74655	6.63745	1.13764	1.10308	1.02274	0.0026	0.0154	0.5431	0.0265225	0.0927076	0.776675
SNOWBALL_013843_st	VPS36	7.76811	7.58192	7.34157	6.89544	1.13775	-1.18128	-1.60935	0.0009	< 0.001	< 0.001	0.0121866	0.00202214	1.11437e-07
SNOWBALL_016802_s_st	SF3A1	8.09258	7.90519	7.73556	7.61461	1.1387	-1.12477	-1.22313	0.0002	0.0006	< 0.001	0.00444472	0.00880039	0.000115891
SNOWBALL_014373_st	MIR9788-2	9.48057	9.29299	9.26323	9.11081	1.13885	-1.02084	-1.1346	0.0029	0.5845	0.0035	0.0284305	0.803017	0.0331957
SNOWBALL_005019_st	AAK1	8.36004	8.17205	8.0981	7.99022	1.13917	-1.0526	-1.13433	0.0014	0.1491	0.0018	0.0170339	0.39419	0.0206612
SNOWBALL_026402_st	BIRC6	8.52136	8.33323	8.40605	8.3317	1.13928	1.05177	-1.00106	0.0034	0.2015	0.978	0.0319586	0.467571	0.991644
SNOWBALL_005973_st	SHC1	8.54439	8.35591	8.24783	8.07438	1.13956	-1.07779	-1.21548	0.0004	0.0205	< 0.001	0.00647979	0.112317	0.000266103
SNOWBALL_020553_s_st	STAG2	7.72509	7.53507	7.47489	7.27811	1.14078	-1.04259	-1.19495	0.0022	0.2664	0.0002	0.0237445	0.544832	0.00335627
SNOWBALL_003083_st	BNC2	8.12548	7.93541	7.76391	7.65698	1.14082	-1.12623	-1.21287	0.0043	0.0086	0.0002	0.0383639	0.0618826	0.00364496
SNOWBALL_019102_s_st	DTD1	7.86292	7.67272	7.58548	7.49303	1.14092	-1.06234	-1.13264	0.0034	0.134	0.005	0.0319479	0.370436	0.0425701
SNOWBALL_023249_s_st	DAZAP2	9.75738	9.56718	9.4698	9.35172	1.14092	-1.06983	-1.16107	0.0028	0.0905	0.0011	0.028358	0.293341	0.0138849
SNOWBALL_008940_st	EPS15	9.36658	9.17613	9.16017	8.97632	1.14112	-1.01113	-1.14854	0.0001	0.6742	< 0.001	0.00251281	0.85503	0.00173787
SNOWBALL_000930_st	SRGAP1	8.44892	8.25821	8.14942	8.06534	1.14133	-1.07832	-1.14304	0.0051	0.0826	0.0047	0.0428709	0.277325	0.0405849
SNOWBALL_025886_s_st	EIF4H	8.95698	8.7661	8.75295	8.71766	1.14146	-1.00916	-1.03415	< 0.001	0.7145	0.1892	0.00163207	0.876203	0.451283
SNOWBALL_006595_st	CERS2	9.5271	9.33581	9.38757	9.26611	1.14178	1.03653	-1.0495	0.0002	0.2158	0.1019	0.00424274	0.485655	0.315167
SNOWBALL_010024_st	CMTR1	6.33014	6.13828	6.182	6.06557	1.14223	1.03076	-1.05169	0.0032	0.4421	0.2083	0.0310505	0.704646	0.476065
SNOWBALL_017938_s_st	PRPF40A	8.23086	8.03787	8.04835	8.05134	1.14313	1.00729	1.00938	< 0.001	0.7546	0.6881	0.000848686	0.896229	0.862482
SNOWBALL_002290_st	SYNCRIP	9.29296	9.09928	9.11803	9.04043	1.14367	1.01308	-1.04164	0.0007	0.6899	0.2202	0.0100527	0.863423	0.491061
SNOWBALL_005344_st	PSME4	7.49926	7.30465	7.35634	7.30145	1.14441	1.03647	-1.00222	0.0052	0.4027	0.9582	0.0434696	0.672797	0.984363
SNOWBALL_005623_st	ASAP1	8.19938	8.00475	7.99863	8.0368	1.14443	-1.00425	1.02246	0.0002	0.8798	0.433	0.00352089	0.953166	0.697395
SNOWBALL_005067_st	MEIS1	7.72937	7.53471	7.51223	7.54564	1.14446	-1.0157	1.00761	0.0013	0.6589	0.8295	0.0159642	0.846568	0.931336
SNOWBALL_014558_st	DNAJC7	7.44592	7.25113	7.34739	7.28185	1.14456	1.069	1.02152	0.0034	0.1095	0.596	0.0325232	0.329049	0.809969
SNOWBALL_021031_s_st	PSMB3	8.68271	8.4878	8.30408	8.20111	1.14465	-1.13581	-1.21984	0.0048	0.0071	0.0002	0.0411116	0.0541824	0.00391665
SNOWBALL_007284_st	NDUFA9	8.16015	7.96509	7.82332	7.71852	1.14477	-1.10326	-1.18638	0.0018	0.0153	0.0002	0.0204145	0.0922542	0.00452651
SNOWBALL_019862_st	TES	7.24137	7.04601	7.02013	6.95019	1.14501	-1.0181	-1.06868	0.0056	0.6776	0.1365	0.0461197	0.856828	0.374465
SNOWBALL_000784_st	COL14A1	7.45069	7.25381	7.31783	7.3105	1.14622	1.04537	1.04008	0.0058	0.3169	0.3739	0.0474529	0.596667	0.648592
SNOWBALL_033243_st	SF3B3	8.33336	8.13567	8.07746	7.96896	1.14686	-1.04117	-1.1225	0.0004	0.2036	0.0016	0.00632212	0.470278	0.0185566
SNOWBALL_034826_st	AGPS	6.95329	6.75534	6.74133	6.82994	1.14707	-1.00976	1.05306	0.001	0.7809	0.1516	0.0136776	0.908602	0.397995
SNOWBALL_014894_st	EIF4A1,CD68	10.8966	10.6986	10.5731	10.4561	1.14713	-1.09087	-1.18306	< 0.001	0.0005	< 0.001	0.000209155	0.00783061	3.16198e-05
SNOWBALL_000922_st	PTGES3	7.57746	7.37917	7.40582	7.5006	1.14734	1.01864	1.08781	0.0047	0.665	0.0616	0.0406498	0.849936	0.231361
SNOWBALL_006793_st	LOC100523244	8.32986	8.13142	8.00473	7.93242	1.14746	-1.09178	-1.1479	0.0063	0.0621	0.0062	0.0499487	0.232435	0.0493019
SNOWBALL_005574_st	AGO2	7.29442	7.09573	7.01519	6.99246	1.14765	-1.05741	-1.07421	0.0009	0.1193	0.0509	0.0124133	0.346063	0.205021
SNOWBALL_022076_st	EIF2B3	7.00816	6.80742	6.8479	6.68475	1.14929	1.02846	-1.08875	0.0028	0.4866	0.0464	0.0278209	0.737675	0.193269
SNOWBALL_024490_s_st	JMJD1C	7.47776	7.27694	7.44059	7.31027	1.14936	1.12012	1.02337	0.006	0.0201	0.6064	0.0482324	0.111111	0.816467
SNOWBALL_011415_st	LOC100627350	8.53818	8.33633	8.35002	8.33568	1.15018	1.00954	-1.00045	0.0008	0.783	0.9896	0.0111571	0.90963	0.996089
SNOWBALL_003148_st	MAPK1IP1L	9.08469	8.88131	8.74969	8.49327	1.15139	-1.09552	-1.30862	< 0.001	0.0038	< 0.001	0.00213955	0.0352322	6.2836e-06
SNOWBALL_005211_st	WDR43	8.18926	7.9852	7.97541	8.08912	1.15193	-1.00681	1.07469	0.0028	0.8679	0.0916	0.0281479	0.948171	0.295678
SNOWBALL_010196_st	GON7	6.39905	6.19491	6.10163	5.9543	1.152	-1.06679	-1.18149	0.0033	0.1343	0.0009	0.031437	0.370943	0.0122508
SNOWBALL_036977_st	ABHD16A	6.44817	6.24399	6.34925	6.35178	1.15203	1.07569	1.07758	0.0031	0.0913	0.0844	0.0298672	0.295012	0.281197
SNOWBALL_013555_st	CUL2	6.49796	6.29375	6.42417	6.49383	1.15205	1.09462	1.14877	0.0047	0.0521	0.0054	0.0404593	0.207942	0.0446476
SNOWBALL_017176_s_st	SHOC2	8.29644	8.09193	8.27872	8.26086	1.1523	1.13823	1.12422	0.0015	0.003	0.0062	0.0179827	0.0298097	0.0491639
SNOWBALL_018620_st		7.75984	7.55427	7.17901	7.16569	1.15314	-1.29707	-1.3091	0.0046	< 0.001	< 0.001	0.0399397	0.000679331	0.000505066
SNOWBALL_025658_st	PPP1R8	6.64193	6.43567	6.24058	6.16817	1.15369	-1.1448	-1.20372	0.0027	0.0041	0.0003	0.0273646	0.0366446	0.00548105
SNOWBALL_004910_st	POLR1B	7.27751	7.07114	7.17754	7.10159	1.15378	1.07654	1.02133	0.0009	0.0534	0.559	0.0127031	0.211278	0.786869
SNOWBALL_021060_s_st	PRMT5	8.25527	8.04886	8.00226	8.03802	1.15381	-1.03283	-1.00754	0.0011	0.3829	0.8373	0.0141424	0.656151	0.934747
SNOWBALL_005846_st	NDUFS2	7.7225	7.51602	7.44947	7.33181	1.15387	-1.0472	-1.13619	0.0006	0.1872	0.0015	0.0089208	0.448594	0.0180453
SNOWBALL_017942_s_st	SSB	9.14604	8.93887	8.8595	8.84702	1.15442	-1.05655	-1.06573	< 0.001	0.0423	0.0212	0.000974382	0.181915	0.115085
SNOWBALL_034496_st	NRP1	8.04327	7.83598	7.54737	7.34288	1.15451	-1.22147	-1.40747	0.0059	0.0004	< 0.001	0.0475475	0.00714096	8.9103e-05
SNOWBALL_018308_s_st	GIGYF2	5.45247	5.24485	5.23803	5.21608	1.15478	-1.00474	-1.02014	0.0059	0.9182	0.666	0.0477822	0.969078	0.85049
SNOWBALL_021153_s_st	SDHA	7.79124	7.58356	7.51384	7.47381	1.15482	-1.04951	-1.07904	0.002	0.234	0.0693	0.0220264	0.507803	0.249019
SNOWBALL_004002_st	VCP	8.37992	8.17136	8.16615	8.12476	1.15553	-1.00362	-1.03282	0.0009	0.9207	0.3791	0.0126192	0.970123	0.6531
SNOWBALL_017692_st	CLASP1	7.66253	7.45317	7.34585	7.23182	1.15617	-1.07723	-1.16583	0.0023	0.0819	0.0015	0.024275	0.275846	0.0176652
SNOWBALL_025741_st	CNOT1	8.91272	8.7033	8.74424	8.68965	1.15622	1.02878	-1.00951	0.0033	0.5094	0.8247	0.0313935	0.75367	0.929143
SNOWBALL_010179_st	FCF1	7.30988	7.10001	7.1289	7.21367	1.15659	1.02023	1.08197	0.0004	0.5465	0.0276	0.0065977	0.778835	0.137403
SNOWBALL_027440_st	CIAPIN1	7.33837	7.12795	6.9261	6.70927	1.15702	-1.15017	-1.3367	0.0013	0.0019	< 0.001	0.0164655	0.020953	7.37472e-05
SNOWBALL_020516_s_st	AFF2	7.49204	7.28151	7.05038	7.0195	1.15711	-1.17375	-1.19915	0.0018	0.0008	0.0003	0.0200168	0.0114262	0.00493618
SNOWBALL_014639_st	MED1	8.31488	8.10411	8.09478	8.14408	1.1573	-1.00649	1.02809	0.0009	0.8593	0.4515	0.0122239	0.944391	0.711739
SNOWBALL_024816_s_st	SMC3	7.85254	7.64081	7.47216	7.39348	1.15808	-1.12401	-1.18701	0.0002	0.0016	< 0.001	0.00429856	0.018829	0.00131246
SNOWBALL_019820_st	TSPAN12	7.45873	7.24665	7.0111	6.31772	1.15836	-1.17735	-1.90386	0.0058	0.0027	< 0.001	0.0469517	0.02762	2.31317e-07
SNOWBALL_013905_s_st	NDFIP2	6.35869	6.14657	5.94797	5.80217	1.15839	-1.14758	-1.26962	0.0014	0.0023	< 0.001	0.0167827	0.0244693	0.000475092
SNOWBALL_016574_s_st	POP5	6.86428	6.65192	6.61508	6.73883	1.15858	-1.02587	1.06209	0.0026	0.5456	0.1646	0.0266934	0.778183	0.41716
SNOWBALL_007940_st	RIPOR1	7.45848	7.24599	7.37193	7.285	1.15869	1.09122	1.02741	0.0004	0.0182	0.4273	0.00697663	0.103799	0.692872
SNOWBALL_008661_st	EFCAB14	7.86947	7.65662	7.64372	7.42526	1.15898	-1.00898	-1.17394	0.0003	0.7868	0.0001	0.00596583	0.91148	0.00326742
SNOWBALL_017831_s_st	GORASP2	8.87803	8.6649	8.73071	8.67882	1.1592	1.04667	1.00969	0.0049	0.3291	0.8342	0.0420319	0.60824	0.93335
SNOWBALL_010269_s_st	RBM25	8.09269	7.87901	7.80346	7.79904	1.15964	-1.05377	-1.057	0.0025	0.2225	0.1978	0.025466	0.49376	0.462658
SNOWBALL_011647_st	HNRNPDL	8.21813	8.0044	8.0106	7.89845	1.15968	1.00431	-1.0762	0.0008	0.9062	0.0575	0.0112001	0.96405	0.221556
SNOWBALL_002135_st	LTV1	6.29994	6.08619	6.12216	6.0097	1.1597	1.02524	-1.05445	0.005	0.592	0.2618	0.0426285	0.807546	0.539775
SNOWBALL_014291_st	EFTUD2	7.91243	7.6984	7.60733	7.71662	1.15992	-1.06516	1.01271	< 0.001	0.0187	0.6076	0.000558538	0.105496	0.817136
SNOWBALL_029352_st	SLC10A3	7.78454	7.57008	7.5078	7.37455	1.16027	-1.04411	-1.14515	< 0.001	0.0953	< 0.001	0.000597966	0.302945	0.00129078
SNOWBALL_018523_s_st	PSMD1	8.42034	8.20547	8.17672	8.1896	1.1606	-1.02013	-1.01106	< 0.001	0.4872	0.6997	0.001857	0.738118	0.868712
SNOWBALL_013201_st	IVNS1ABP	9.63267	9.4177	9.22414	9.1342	1.16068	-1.14358	-1.21714	< 0.001	0.0003	< 0.001	0.00241523	0.00522588	0.000241408
SNOWBALL_015845_st	SYNJ1	6.47401	6.25873	6.09558	6.23374	1.16093	-1.11973	-1.01747	0.0017	0.0114	0.6675	0.0193262	0.0754797	0.851286
SNOWBALL_029123_st	CCDC47	6.76052	6.54505	6.65487	6.59847	1.16108	1.07909	1.03772	0.0006	0.0441	0.3037	0.00877947	0.187057	0.58373
SNOWBALL_047336_st		6.03136	5.81567	5.68414	5.59658	1.16125	-1.09546	-1.164	0.0011	0.0279	0.001	0.0143623	0.138457	0.0130554
SNOWBALL_004208_st	NUP188	7.08145	6.86576	6.86114	6.81123	1.16126	-1.0032	-1.03852	< 0.001	0.9041	0.167	0.00102247	0.963185	0.420519
SNOWBALL_022896_st	RNF214	10.9604	10.7447	10.4502	10.256	1.16127	-1.22644	-1.40318	0.0008	< 0.001	< 0.001	0.0115149	0.00120883	1.20256e-05
SNOWBALL_047682_st	TOPBP1	6.38184	6.16536	5.64874	5.23706	1.16189	-1.4306	-1.90303	0.0042	< 0.001	< 0.001	0.037754	5.53003e-05	1.81834e-07
SNOWBALL_002387_s_st	ATP5A1	10.2662	10.0495	9.89237	9.80947	1.16204	-1.11508	-1.18103	< 0.001	0.0003	< 0.001	0.000381025	0.00493311	0.000152536
SNOWBALL_029080_st	HNRNPL	9.75965	9.54296	9.12268	8.88938	1.16207	-1.33819	-1.57307	0.0004	< 0.001	< 0.001	0.00640669	2.29737e-05	3.09732e-07
SNOWBALL_016320_s_st	LOC100158040	7.98558	7.76827	7.67563	7.64354	1.16256	-1.06632	-1.0903	0.0061	0.1966	0.0885	0.0486304	0.461068	0.289254
SNOWBALL_024275_st	EWSR1	6.77606	6.55863	6.58619	6.52703	1.16266	1.01929	-1.02215	0.0023	0.653	0.6066	0.0245332	0.843365	0.816546
SNOWBALL_034480_st	NADK	7.5806	7.36279	7.2332	7.17861	1.16296	-1.09399	-1.13617	0.0036	0.0598	0.0109	0.033782	0.227059	0.0732193
SNOWBALL_020995_s_st	TNFRSF12A	9.19679	8.97889	8.7331	8.63488	1.16305	-1.18574	-1.26928	0.0009	0.0003	< 0.001	0.0125387	0.00567323	0.00039863
SNOWBALL_019143_s_st	EIF2S2	9.47189	9.25303	9.3678	9.20132	1.16381	1.0828	-1.03649	0.0012	0.0564	0.3678	0.0153072	0.218708	0.643269
SNOWBALL_014199_st	NOL11	7.19626	6.97704	7.02923	7.10521	1.1641	1.03683	1.0929	0.0015	0.376	0.0399	0.0177488	0.650388	0.17529
SNOWBALL_026986_st	TNFRSF12A	8.85598	8.63657	8.31814	8.18953	1.16426	-1.24697	-1.36324	0.0061	0.0003	< 0.001	0.0485895	0.00553651	0.000376416
SNOWBALL_011671_st	METAP1	8.47287	8.25308	8.10679	7.97581	1.16456	-1.10672	-1.2119	0.0005	0.0102	< 0.001	0.0077025	0.0700044	0.00139033
SNOWBALL_007899_st	MLKL	7.63608	7.41608	7.38885	7.24341	1.16473	-1.01906	-1.12715	0.0027	0.6668	0.0134	0.0273486	0.850907	0.0840716
SNOWBALL_007327_st	NOP2	6.71214	6.49213	6.63218	6.65043	1.16474	1.10194	1.11597	0.0008	0.018	0.0089	0.0110045	0.103109	0.0635043
SNOWBALL_038803_st	CDK5RAP2	6.39207	6.17193	5.96007	5.92368	1.16485	-1.15818	-1.18777	0.0028	0.0037	0.0011	0.02786	0.0341272	0.0139764
SNOWBALL_002082_st	TCP1	9.9008	9.6794	9.66268	9.70626	1.16587	-1.01166	1.0188	0.0001	0.7105	0.5523	0.00294666	0.8741	0.782554
SNOWBALL_004354_st	SAP25,LRCH4	5.23505	5.01327	5.00726	5.02209	1.16617	-1.00418	1.00613	0.0033	0.9267	0.8927	0.0316948	0.972522	0.958499
SNOWBALL_009509_st	EEF1E1	7.10121	6.87913	6.81409	6.83781	1.16641	-1.04611	-1.02906	0.0034	0.3294	0.5318	0.0322604	0.608457	0.769019
SNOWBALL_026568_st	BCS1L	7.55367	7.33108	7.26957	7.27433	1.16683	-1.04356	-1.04012	0.0028	0.3442	0.3819	0.0280142	0.622069	0.655421
SNOWBALL_007285_st	CNOT2	8.68766	8.4649	8.51864	8.56994	1.16696	1.03795	1.07552	< 0.001	0.174	0.0134	0.000803178	0.430365	0.0840865
SNOWBALL_014744_s_st	LOC100523020	8.93425	8.71064	8.6244	8.54334	1.16765	-1.0616	-1.12295	0.0005	0.1166	0.0054	0.00858603	0.341467	0.0447089
SNOWBALL_013702_st	FAM208B	7.23723	7.01354	7.0726	7.07533	1.16771	1.04178	1.04376	0.0016	0.3313	0.3101	0.0186014	0.610144	0.590142
SNOWBALL_007711_st	ADIPOR2	7.20015	6.97606	6.85335	6.76805	1.16804	-1.08878	-1.15509	0.0003	0.0213	0.0005	0.00496606	0.115402	0.00825787
SNOWBALL_005297_st	B3GNT2	9.08339	8.85877	8.72454	8.6368	1.16848	-1.09751	-1.16632	0.0011	0.031	0.0012	0.014491	0.148594	0.0155891
SNOWBALL_026848_st	SLC23A2	6.67736	6.45238	6.3323	6.00023	1.16876	-1.08679	-1.36807	0.0038	0.0904	< 0.001	0.0352872	0.293227	0.000238388
SNOWBALL_002600_st	RTN4IP1	6.48671	6.26157	6.13009	6.22611	1.16889	-1.09541	-1.02488	0.0013	0.037	0.5481	0.0159683	0.167059	0.779902
SNOWBALL_019446_st	CTNNBL1	7.44484	7.2189	7.08641	7.0404	1.16954	-1.09618	-1.13171	0.0002	0.0122	0.0016	0.00390533	0.0790157	0.018283
SNOWBALL_035427_st	NDE1	6.68414	6.45812	6.24576	6.18649	1.1696	-1.15858	-1.20717	0.0061	0.009	0.0016	0.0485964	0.0642247	0.018479
SNOWBALL_009270_st	ACOT7	6.00563	5.77958	5.81015	5.89873	1.16963	1.02141	1.0861	0.0045	0.6615	0.1012	0.0396182	0.848028	0.313853
SNOWBALL_014414_st	PSMD3	7.70944	7.48319	7.31919	7.10226	1.16979	-1.12039	-1.30218	0.0037	0.0257	< 0.001	0.0344417	0.130933	0.00104416
SNOWBALL_017083_s_st	ANXA7	9.00101	8.77473	8.86013	8.87536	1.16982	1.06098	1.07224	0.0004	0.1146	0.0668	0.00713912	0.338026	0.243535
SNOWBALL_026193_s_st	CCT8	9.72522	9.49891	9.41683	9.46446	1.16983	-1.05855	-1.02417	0.0003	0.1117	0.4899	0.00510249	0.332915	0.740063
SNOWBALL_019716_st	SLC35B4	6.66664	6.43992	6.2905	6.49296	1.17017	-1.10913	1.03745	0.0042	0.043	0.4467	0.0375535	0.183986	0.70815
SNOWBALL_017906_st	RBMS1	8.86129	8.63441	8.41837	8.38143	1.1703	-1.16154	-1.19167	< 0.001	< 0.001	< 0.001	0.00142273	0.0020817	0.000574713
SNOWBALL_006806_st	FBXO7	6.90731	6.67875	6.56234	6.59581	1.17166	-1.08404	-1.05918	0.0029	0.093	0.2213	0.0288896	0.298558	0.492448
SNOWBALL_018517_st	EIF4E2	7.42532	7.19651	7.16251	7.06578	1.17187	-1.02385	-1.09485	< 0.001	0.2751	0.0005	8.37541e-05	0.554217	0.00802142
SNOWBALL_014445_s_st	SUZ12	7.55058	7.32151	7.25599	7.21575	1.17208	-1.04646	-1.07606	0.0025	0.3205	0.1174	0.0256478	0.600039	0.342835
SNOWBALL_037336_st	VPS25	8.64192	8.41281	8.37625	8.27779	1.17211	-1.02567	-1.09811	0.0013	0.5435	0.0358	0.0160946	0.776858	0.163282
SNOWBALL_018700_st	RARS	8.08432	7.85305	7.84678	7.83529	1.17387	-1.00436	-1.01239	< 0.001	0.876	0.6592	0.0008582	0.951563	0.846771
SNOWBALL_000880_st	LOC100624086	6.67322	6.4414	5.94165	5.60773	1.17431	-1.41397	-1.78221	0.0038	< 0.001	< 0.001	0.0349536	0.000123461	8.94199e-07
SNOWBALL_006159_st	IMPAD1	8.92801	8.69576	8.59064	8.59615	1.17466	-1.07558	-1.07149	0.0001	0.0346	0.0438	0.00253943	0.159805	0.186158
SNOWBALL_025944_s_st	EIF6	7.50197	7.2695	7.25453	7.10447	1.17485	-1.01042	-1.12119	0.003	0.8247	0.0245	0.0292559	0.929143	0.126627
SNOWBALL_015230_st	OXSR1	7.85146	7.61877	7.62039	7.53791	1.17502	1.00112	-1.05765	0.0006	0.9768	0.1581	0.00912916	0.991161	0.407753
SNOWBALL_010874_st	IDH3A	8.85527	8.62254	8.66407	8.62838	1.17506	1.0292	1.00406	0.0003	0.4291	0.9105	0.00589787	0.694376	0.965825
SNOWBALL_004904_st	PTCD3	6.51594	6.28306	6.30062	6.32863	1.17518	1.01225	1.03209	< 0.001	0.6854	0.3002	0.00148118	0.86106	0.580357
SNOWBALL_023005_s_st	SMARCA5	10.011	9.77807	9.84416	9.81266	1.17523	1.04687	1.02427	0.0062	0.385	0.6464	0.0495283	0.658041	0.839622
SNOWBALL_002143_s_st	NHSL1	5.07282	4.83983	4.70931	4.53848	1.17527	-1.09469	-1.23229	0.0011	0.0405	< 0.001	0.0140234	0.176977	0.00238341
SNOWBALL_004561_st	SEPHS2	7.36087	7.12661	7.03275	7.05307	1.17631	-1.06722	-1.0523	0.0002	0.0719	0.1506	0.00395166	0.25483	0.396354
SNOWBALL_016911_s_st	PDCD11	6.37881	6.14413	6.11067	6.1174	1.17665	-1.02346	-1.0187	0.0051	0.6499	0.7166	0.0429951	0.841578	0.877262
SNOWBALL_023384_s_st	LOC100520516	9.48277	9.24803	9.26353	9.19504	1.17669	1.0108	-1.03741	< 0.001	0.7257	0.24	0.00162675	0.881819	0.515025
SNOWBALL_006030_st	CCT3	9.69338	9.45758	9.26804	9.267	1.17756	-1.1404	-1.14122	< 0.001	< 0.001	< 0.001	2.77645e-05	0.000212525	0.000201967
SNOWBALL_033342_st	PUM1	8.80678	8.57095	8.42797	8.33198	1.17759	-1.10418	-1.18015	< 0.001	0.006	< 0.001	0.00211558	0.0481022	0.00190992
SNOWBALL_029113_st	KIF1B	6.45382	6.21755	6.04616	5.67753	1.17795	-1.12614	-1.45399	0.0042	0.028	< 0.001	0.0377257	0.138607	8.28725e-05
SNOWBALL_039940_s_st		7.85683	7.62022	7.66084	7.47685	1.17822	1.02856	-1.10448	0.0025	0.5476	0.0455	0.0259017	0.779556	0.190872
SNOWBALL_013710_st	CDK8	8.80147	8.56483	8.33362	8.17021	1.17825	-1.17382	-1.3146	0.0001	0.0002	< 0.001	0.00325143	0.00387461	3.94471e-05
SNOWBALL_009286_st	SF3A3	8.60279	8.36609	8.28245	8.29437	1.17829	-1.05969	-1.05097	0.0002	0.1018	0.1561	0.00338258	0.314999	0.40476
SNOWBALL_035204_st	SLC35B4	5.31954	5.08172	5.01086	5.16917	1.17921	-1.05035	1.06249	0.0027	0.3056	0.21	0.0269672	0.585587	0.47822
SNOWBALL_013757_st	LOC100624739	8.84101	8.60298	8.25703	8.01818	1.17938	-1.27099	-1.49983	0.0032	0.0001	< 0.001	0.0307013	0.00279413	2.87757e-05
SNOWBALL_017828_s_st	DCAF17	5.61359	5.37479	5.38129	5.29454	1.18002	1.00452	-1.0572	0.0022	0.9224	0.24	0.023896	0.970891	0.515025
SNOWBALL_018697_st	FAM114A2	7.30961	7.07073	7.01828	6.86355	1.18008	-1.03702	-1.15443	0.0062	0.4992	0.0148	0.0494491	0.746515	0.0901326
SNOWBALL_002682_st	MTAP	7.40674	7.16781	7.15272	7.09806	1.18012	-1.01051	-1.04953	0.0011	0.8049	0.2626	0.0140702	0.919945	0.540635
SNOWBALL_000144_st	SLC35B1	7.13697	6.89762	6.75672	6.7458	1.18047	-1.10259	-1.11097	0.0042	0.067	0.0502	0.0373012	0.243878	0.203162
SNOWBALL_013044_st	XPR1	7.43497	7.19549	7.10801	7.00098	1.18057	-1.06251	-1.14434	0.0056	0.2602	0.0195	0.0462078	0.537992	0.108834
SNOWBALL_008791_s_st	SRRM1	9.17566	8.93551	8.67852	8.52512	1.18112	-1.19498	-1.32904	0.0038	0.0023	< 0.001	0.0350075	0.0243972	0.000950434
SNOWBALL_007431_st	MLF2	9.32647	9.08545	8.90555	8.64253	1.18182	-1.13281	-1.35936	< 0.001	0.0008	< 0.001	0.00144625	0.0117209	5.54906e-06
SNOWBALL_016894_s_st	ECD	8.00658	7.76556	7.84245	7.86334	1.18183	1.05474	1.07013	< 0.001	0.0354	0.01	0.000137563	0.162103	0.0687385
SNOWBALL_024011_s_st	BZW1	8.72939	8.48789	8.53904	8.55992	1.18222	1.03609	1.0512	0.0021	0.4481	0.2896	0.0224501	0.709241	0.569476
SNOWBALL_014984_st	EIF5A	11.5605	11.3189	11.1534	11.0253	1.1823	-1.12154	-1.22567	0.0003	0.0055	< 0.001	0.0048462	0.045673	0.00108661
SNOWBALL_017883_s_st	PPIG	8.12982	7.88798	7.98703	8.01828	1.1825	1.07107	1.09453	0.0015	0.1356	0.0553	0.0174472	0.373065	0.215889
SNOWBALL_033138_st	AKAP2	7.6261	7.38393	7.592	7.40395	1.18277	1.15514	1.01398	0.0008	0.0027	0.7374	0.0112192	0.0272501	0.887858
SNOWBALL_008750_st	SNRPD1	6.89511	6.65271	6.51341	6.60984	1.18296	-1.10137	-1.03016	0.0012	0.0383	0.4972	0.0151687	0.170814	0.745138
SNOWBALL_017799_st	SPCS3	7.76143	7.51757	7.33677	7.23814	1.18416	-1.13351	-1.21371	0.0031	0.0201	0.0011	0.0299898	0.110893	0.0137986
SNOWBALL_021609_st	PPM1G	7.91758	7.67303	7.55246	7.57595	1.18472	-1.08716	-1.0696	< 0.001	0.0078	0.0263	0.000547902	0.0579305	0.13288
SNOWBALL_003122_st	LOC100156248	6.82732	6.58266	6.49375	6.27962	1.18482	-1.06357	-1.23374	0.0058	0.2644	0.0012	0.0470539	0.542531	0.0148355
SNOWBALL_021566_s_st	KATNAL1	6.62012	6.37545	6.51194	6.2327	1.18482	1.09923	-1.104	0.0053	0.0913	0.0786	0.0445581	0.295056	0.269074
SNOWBALL_013716_st	IFT88	6.69333	6.44785	6.52515	6.34093	1.18549	1.05504	-1.07693	0.0005	0.1935	0.0788	0.00846546	0.45704	0.269476
SNOWBALL_010523_s_st	SERPINA5	4.57649	4.33073	4.29777	4.49859	1.18572	-1.02311	1.12339	0.0048	0.6662	0.0398	0.0409919	0.850558	0.175097
SNOWBALL_015448_s_st	PDHB	7.26833	7.02231	6.83096	6.78698	1.18593	-1.14183	-1.17717	0.0038	0.0183	0.0052	0.0351502	0.104053	0.0438142
SNOWBALL_006291_st	TRMT13	6.12614	5.87989	5.9029	5.91809	1.18612	1.01608	1.02683	0.0019	0.7331	0.5726	0.0210756	0.885486	0.795514
SNOWBALL_000846_st	NCSTN	7.55797	7.31166	7.24131	7.16735	1.18616	-1.04997	-1.10521	< 0.001	0.1399	0.0057	0.00155117	0.37993	0.0467747
SNOWBALL_034954_st	ARL6IP1	9.20614	8.95784	8.77065	8.54685	1.18781	-1.13854	-1.32959	0.0054	0.0277	< 0.001	0.0450309	0.137577	0.00184828
SNOWBALL_022259_s_st	NT5C2,PCGF6	8.26583	8.01726	7.98428	7.80371	1.18802	-1.02313	-1.15954	0.0032	0.6525	0.009	0.0311326	0.843078	0.0641393
SNOWBALL_018782_s_st	C1QTNF2	5.54814	5.29946	5.39602	5.40854	1.18812	1.06921	1.07854	0.0011	0.143	0.101	0.0142869	0.384881	0.313501
SNOWBALL_023378_s_st	ARPC5L	7.96133	7.71116	7.57054	7.54877	1.18935	-1.10237	-1.11914	0.0014	0.0456	0.0235	0.0169089	0.190876	0.123176
SNOWBALL_043547_st	HEATR3	3.02819	2.7776	2.92637	2.91032	1.18969	1.10863	1.09636	0.0019	0.0425	0.0668	0.0210649	0.182402	0.243487
SNOWBALL_004298_st	USP42	6.63995	6.38704	6.36172	6.34589	1.19161	-1.0177	-1.02893	0.0037	0.7387	0.5888	0.0344827	0.888446	0.805665
SNOWBALL_012837_st	LAMB1	9.12769	8.87459	8.94413	8.91079	1.19177	1.04938	1.02541	< 0.001	0.108	0.3886	0.000525666	0.326343	0.661025
SNOWBALL_017830_st	MAP3K20	7.09961	6.84618	6.9295	6.89542	1.19204	1.05945	1.03472	0.0034	0.2763	0.5148	0.0325895	0.555576	0.75745
SNOWBALL_004765_st	ZC3H7A	7.73865	7.48493	7.34565	7.28998	1.19227	-1.10136	-1.14468	0.0004	0.0259	0.0034	0.00660267	0.131463	0.0321317
SNOWBALL_016051_st	ATP13A3	9.57434	9.32061	9.15663	9.00618	1.19229	-1.12037	-1.24352	0.0003	0.0086	< 0.001	0.00516763	0.0619952	0.000998733
SNOWBALL_009202_st	WLS	8.98446	8.72915	8.55521	8.42762	1.19359	-1.12814	-1.23245	0.0002	0.0048	< 0.001	0.00404083	0.0416124	0.00111893
SNOWBALL_001234_s_st	BAG6	7.71813	7.46168	7.30953	7.24854	1.19453	-1.11123	-1.15921	0.0058	0.0774	0.0177	0.0472306	0.26668	0.101881
SNOWBALL_014221_st	JPT1	7.71743	7.46095	7.33673	7.32592	1.19456	-1.08992	-1.09812	0.0029	0.1079	0.0826	0.0284552	0.326154	0.277415
SNOWBALL_023827_st	SLC23A2	7.96099	7.70378	7.49857	7.19773	1.19516	-1.15286	-1.42016	< 0.001	0.0007	< 0.001	0.001997	0.0100165	4.30187e-06
SNOWBALL_008667_st	ANKRD13C	8.13124	7.87391	8.00285	7.97458	1.19527	1.09349	1.07227	< 0.001	0.0178	0.0557	0.00197514	0.102052	0.217119
SNOWBALL_008262_st	TOMM40	8.36401	8.10665	8.00268	7.99314	1.19529	-1.07472	-1.08186	0.0043	0.1974	0.1614	0.0378604	0.462111	0.412457
SNOWBALL_047282_st	VKORC1L1	6.74388	6.48562	6.47176	6.19352	1.19604	-1.00965	-1.22442	0.0032	0.8548	0.0012	0.0306907	0.942441	0.015332
SNOWBALL_018321_x_st	NCL	9.49233	9.2332	8.99256	8.95583	1.19676	-1.18151	-1.21198	0.0001	0.0003	< 0.001	0.00301591	0.00518397	0.00179469
SNOWBALL_009383_st	TAF4B	5.7872	5.52779	5.45339	5.60117	1.19699	-1.05292	1.05218	0.0056	0.3723	0.3786	0.0458267	0.647172	0.652619
SNOWBALL_021441_s_st	CD99	9.92858	9.66779	9.31021	8.85659	1.19814	-1.28128	-1.75467	0.0011	< 0.001	< 0.001	0.0141387	0.0015274	7.65706e-07
SNOWBALL_019847_s_st	LOC100511984	6.85971	6.59755	6.5431	6.19523	1.19928	-1.03846	-1.32163	0.0005	0.378	< 0.001	0.00777204	0.652131	0.00026615
SNOWBALL_011943_st	EIF4E	8.50905	8.24669	8.27595	8.29759	1.19944	1.02049	1.03591	0.0001	0.5799	0.3403	0.00268454	0.800218	0.618454
SNOWBALL_007453_st	CCND2	10.0916	9.82918	9.89089	9.71857	1.19947	1.04371	-1.07968	0.0029	0.4217	0.1589	0.0289225	0.688343	0.408855
SNOWBALL_012619_st	GNAI1	8.89914	8.6362	8.53251	8.21121	1.19993	-1.07452	-1.34256	0.0003	0.0924	< 0.001	0.00595996	0.297136	0.000116186
SNOWBALL_017991_s_st	XRCC5	7.21101	6.9479	6.84014	6.68066	1.20006	-1.07755	-1.20351	< 0.001	0.0199	< 0.001	0.000448727	0.110338	0.000391665
SNOWBALL_017382_s_st	SMC3	8.69953	8.43637	8.28051	8.23721	1.2001	-1.11408	-1.14804	< 0.001	0.0072	0.0012	0.00220654	0.0548086	0.0150338
SNOWBALL_014612_s_st	SUZ12	8.11473	7.85086	7.7775	7.80305	1.2007	-1.05217	-1.03369	0.0008	0.2696	0.4669	0.0114459	0.548278	0.723475
SNOWBALL_015997_st	USF3	7.94818	7.682	7.6031	7.56926	1.20263	-1.05621	-1.08128	0.0007	0.2324	0.0952	0.0102258	0.505875	0.30264
SNOWBALL_014854_st	RPA1	7.335	7.06828	6.90279	6.6395	1.20307	-1.12155	-1.3461	< 0.001	0.0009	< 0.001	0.000321521	0.012235	3.64776e-06
SNOWBALL_004986_st	LOXL3	6.94064	6.67327	6.26019	6.08949	1.20361	-1.33153	-1.49878	0.0055	0.0001	< 0.001	0.0454122	0.00316639	0.000178871
SNOWBALL_026397_s_st	NOP58	9.24279	8.97527	9.02886	9.0329	1.20373	1.03784	1.04075	0.0026	0.4868	0.4551	0.0268678	0.737808	0.714454
SNOWBALL_012286_s_st	FAM168A	7.01655	6.74892	6.88946	6.74814	1.20383	1.10232	-1.00055	0.0022	0.0734	0.9916	0.0233037	0.258187	0.996867
SNOWBALL_012549_st	CDK14	8.89212	8.62387	8.64305	8.57972	1.20434	1.01338	-1.03107	0.0006	0.7651	0.4943	0.0092746	0.90114	0.743178
SNOWBALL_005830_st	PBX1	7.82034	7.55185	7.2299	7.45518	1.20454	-1.25002	-1.0693	0.0053	0.0014	0.2627	0.0442848	0.016682	0.540641
SNOWBALL_037163_st	TBP	7.91615	7.64646	7.42649	7.33638	1.20555	-1.16471	-1.23978	0.0009	0.0044	0.0003	0.0123762	0.038793	0.00489165
SNOWBALL_038262_st	HNRNPC	7.97282	7.70309	8.05415	8.04103	1.20559	1.2755	1.26395	0.0023	0.0002	0.0003	0.0242526	0.00457058	0.00597513
SNOWBALL_014434_st	LRRC59	9.94299	9.67319	9.40439	9.23661	1.20564	-1.20481	-1.35339	0.0004	0.0005	< 0.001	0.00729851	0.00748596	0.000151456
SNOWBALL_002128_st	PCMT1	6.4997	6.22923	6.065	5.85812	1.2062	-1.12057	-1.29335	0.0043	0.0605	0.0003	0.0379955	0.228553	0.00573438
SNOWBALL_019147_s_st	SNRPB	7.31803	7.04754	6.64611	6.43747	1.20622	-1.32082	-1.52633	0.0008	< 0.001	< 0.001	0.0116722	0.000612721	1.28187e-05
SNOWBALL_001982_st	VBP1	7.44351	7.17299	7.2763	7.28479	1.20624	1.07424	1.08057	0.0023	0.1848	0.1531	0.0239908	0.445335	0.400329
SNOWBALL_045202_st		2.58778	2.31682	2.34646	2.30499	1.20662	1.02076	-1.00823	0.0042	0.7198	0.886	0.037343	0.878827	0.955637
SNOWBALL_000245_st	LOC102167790	8.26312	7.99208	7.97661	8.05373	1.20667	-1.01078	1.04366	0.001	0.8207	0.3721	0.0128327	0.927278	0.646996
SNOWBALL_019784_st	TMEM168	6.90315	6.63193	6.68762	6.50319	1.20682	1.03935	-1.09334	< 0.001	0.2342	0.0114	0.000670854	0.508047	0.0754027
SNOWBALL_034752_st	TOPBP1	8.98039	8.709	8.22918	7.74898	1.20697	-1.39457	-1.94535	0.0006	< 0.001	< 0.001	0.0092833	9.34496e-05	1.10292e-07
SNOWBALL_016023_st	LOC102160509	4.52068	4.24898	4.02165	4.0791	1.20723	-1.17067	-1.12497	0.0003	0.0013	0.0103	0.00507777	0.0161835	0.070556
SNOWBALL_016474_s_st	ANAPC5	6.80301	6.5308	6.31528	6.36602	1.20765	-1.16113	-1.121	0.0008	0.0047	0.0231	0.0108385	0.040461	0.121907
SNOWBALL_017187_s_st	PDCD11	5.56856	5.29543	5.30724	5.35291	1.20843	1.00822	1.04065	0.0034	0.8839	0.4807	0.0324556	0.954804	0.733421
SNOWBALL_006941_st	LOC110256464	9.64162	9.36796	8.99347	8.896	1.20887	-1.29638	-1.38699	0.0003	< 0.001	< 0.001	0.00550858	0.00046779	5.75432e-05
SNOWBALL_012196_st	RRM1	8.17763	7.90391	7.64455	7.35496	1.20893	-1.19694	-1.46302	0.0005	0.0008	< 0.001	0.00828455	0.0117271	2.41538e-05
SNOWBALL_021036_s_st	SLC30A1	7.11849	6.84394	6.8124	6.70542	1.20961	-1.0221	-1.10078	< 0.001	0.5466	0.0156	0.00173639	0.778838	0.0934276
SNOWBALL_018101_st	MYO1B	8.97574	8.70103	8.39962	8.25464	1.20975	-1.23234	-1.36262	< 0.001	< 0.001	< 0.001	0.00105517	0.000483816	1.25412e-05
SNOWBALL_012628_st	CLMP	8.89949	8.6247	8.47127	8.34739	1.20981	-1.11221	-1.21194	0.0006	0.0293	0.0005	0.00878778	0.143085	0.00826539
SNOWBALL_023377_s_st	MEF2D	7.73814	7.46199	7.25708	7.00411	1.21095	-1.15262	-1.37353	0.0003	0.0035	< 0.001	0.00536026	0.0330019	8.01106e-05
SNOWBALL_010765_s_st	PSMA6	8.78238	8.5048	8.45645	8.39141	1.21215	-1.03409	-1.08177	< 0.001	0.3123	0.0264	0.000703681	0.59221	0.133153
SNOWBALL_026082_s_st	PMP22	8.494	8.21575	8.1492	7.81453	1.21272	-1.04721	-1.32062	0.0002	0.2757	< 0.001	0.00453489	0.554827	0.000232139
SNOWBALL_008585_st	PLAUR	9.65625	9.37737	9.0207	8.89486	1.21325	-1.28046	-1.39716	0.0005	< 0.001	< 0.001	0.00764824	0.001233	8.74111e-05
SNOWBALL_019173_st	CDC25B	6.36669	6.08705	5.5644	5.39744	1.21389	-1.43659	-1.61284	0.0038	< 0.001	< 0.001	0.0352153	0.00044853	3.54417e-05
SNOWBALL_005171_st	SLC5A6	6.75813	6.47764	6.35964	6.26282	1.21461	-1.08523	-1.16056	0.0015	0.1281	0.01	0.0180712	0.360964	0.0689153
SNOWBALL_042245_st	SOGA1	6.25989	5.97778	6.32618	6.33286	1.21597	1.27314	1.27905	0.006	0.0013	0.0011	0.0483684	0.0156602	0.0139547
SNOWBALL_018340_st	NCL	9.85059	9.56838	9.38728	9.46706	1.21605	-1.13375	-1.07276	< 0.001	0.0022	0.0585	0.00110176	0.0235673	0.223999
SNOWBALL_017785_s_st	ACSL1	6.49939	6.2169	6.20923	6.03998	1.21629	-1.00533	-1.13047	0.0061	0.9327	0.0655	0.048897	0.974955	0.240578
SNOWBALL_001191_st	MIC-1	6.54484	6.26169	5.76248	5.40814	1.21685	-1.41344	-1.80694	0.0005	< 0.001	< 0.001	0.00843048	8.38446e-05	4.62597e-07
SNOWBALL_006614_st	PIP5K1A	8.38097	8.0977	8.02862	7.94529	1.21696	-1.04905	-1.11142	0.0001	0.2432	0.0166	0.00309993	0.518726	0.0977257
SNOWBALL_002022_st	C1H6orf120	7.00113	6.71779	6.7117	6.79316	1.21701	-1.00423	1.05363	< 0.001	0.9128	0.1876	0.00228303	0.966775	0.449273
SNOWBALL_009792_st	LOC110261673	9.32506	9.04095	8.6945	8.45055	1.21766	-1.27142	-1.50566	0.0053	0.0012	< 0.001	0.0444092	0.0151325	0.000267181
SNOWBALL_003253_st	ZWILCH	6.70178	6.41749	6.16303	5.95918	1.21781	-1.19289	-1.37394	0.0055	0.0111	< 0.001	0.0455424	0.0742648	0.00231041
SNOWBALL_009649_st	LOC100155734	7.15782	6.87308	6.6313	6.33646	1.21819	-1.18245	-1.45057	0.0041	0.0117	< 0.001	0.0367666	0.0770237	0.000449751
SNOWBALL_025974_s_st	CSE1L	9.15135	8.86654	8.81328	8.66463	1.21825	-1.03761	-1.15022	0.0004	0.4109	0.0056	0.00618659	0.679532	0.0458267
SNOWBALL_006020_st	MTFR1	6.90838	6.62329	6.56751	6.44425	1.21849	-1.03942	-1.13213	0.0005	0.4079	0.0149	0.00803895	0.67716	0.0905435
SNOWBALL_015220_st	SLC4A7	7.26828	6.9831	6.81833	6.50384	1.21856	-1.12099	-1.39402	0.0025	0.0546	< 0.001	0.0254857	0.214221	0.000661643
SNOWBALL_020413_st	HCFC1	6.68426	6.39842	6.34764	6.32228	1.21912	-1.03582	-1.05419	< 0.001	0.3068	0.1331	0.000752038	0.586834	0.368972
SNOWBALL_026841_st	SLC11A2	6.98255	6.69649	6.54134	6.31936	1.21931	-1.11354	-1.29876	0.0017	0.0588	0.0001	0.0198794	0.224512	0.00320795
SNOWBALL_034083_st	ZNF697	6.69351	6.40706	6.38742	6.20647	1.21964	-1.0137	-1.14917	0.0006	0.7749	0.009	0.00938548	0.905739	0.0641155
SNOWBALL_006616_st	LOC110256744	8.57849	8.29166	8.22267	8.28671	1.21995	-1.04898	-1.00344	0.0012	0.3567	0.9465	0.0147614	0.633344	0.980019
SNOWBALL_027259_st	PRPS1	6.20309	5.91541	5.59798	5.34253	1.22068	-1.24611	-1.48748	0.0021	0.0009	< 0.001	0.0227453	0.0127377	0.000122927
SNOWBALL_012978_st	C9H1orf27	6.58216	6.29426	6.48047	6.38614	1.22086	1.13777	1.06575	0.0001	0.0049	0.127	0.00276868	0.0418189	0.358928
SNOWBALL_003187_s_st	PMAIP1	6.86891	6.58035	6.12794	5.6223	1.22141	-1.36833	-1.94269	0.0043	< 0.001	< 0.001	0.0380476	0.00215181	2.33549e-06
SNOWBALL_025121_st	SENP2	7.32158	7.03256	6.96471	6.68915	1.22181	-1.04815	-1.26875	0.0006	0.3315	0.0001	0.00905746	0.610325	0.0026721
SNOWBALL_020068_st	SH3KBP1	8.55961	8.2705	8.19223	7.81614	1.22189	-1.05576	-1.37018	0.0026	0.3494	< 0.001	0.0266343	0.626788	0.00123608
SNOWBALL_017095_s_st	MCMBP	8.62447	8.33432	8.42017	8.24555	1.22277	1.06131	-1.06346	< 0.001	0.0883	0.0789	0.000573098	0.288902	0.269651
SNOWBALL_010057_st	KCTD20	7.33666	7.04613	6.8484	6.84388	1.22309	-1.1469	-1.15049	0.0011	0.0155	0.0136	0.0140081	0.0929334	0.0852678
SNOWBALL_025941_s_st	TNRC6B	6.9709	6.6803	6.71229	6.58458	1.22314	1.02242	-1.0686	0.0062	0.7332	0.3147	0.0492999	0.885587	0.594442
SNOWBALL_014374_st	PSME3	9.18755	8.89689	8.84617	8.85615	1.2232	-1.03578	-1.02864	< 0.001	0.2375	0.339	0.000171504	0.512012	0.617122
SNOWBALL_024755_s_st	MCMBP	8.39414	8.10266	8.08155	7.93744	1.2239	-1.01474	-1.12134	< 0.001	0.6148	0.001	0.000160031	0.821452	0.0132451
SNOWBALL_009586_x_st	LOC100156127	8.77374	8.48224	7.84117	7.49251	1.22391	-1.55949	-1.98582	0.0031	< 0.001	< 0.001	0.0302522	7.98215e-05	1.20333e-06
SNOWBALL_000791_s_st	RAD21	7.79092	7.4991	7.26018	7.0279	1.22418	-1.18011	-1.38626	< 0.001	0.0002	< 0.001	0.00101411	0.00472529	1.27211e-05
SNOWBALL_019418_s_st	FITM2	6.57326	6.28086	6.16153	6.18833	1.22468	-1.08623	-1.06623	0.0002	0.0679	0.1484	0.00401523	0.245812	0.393133
SNOWBALL_009542_st	MBOAT1	9.13956	8.84698	8.73094	8.31378	1.22483	-1.08376	-1.44714	0.0003	0.0917	< 0.001	0.00610809	0.29579	3.89727e-05
SNOWBALL_009250_st	KIF1B	7.66951	7.37643	7.14709	6.73291	1.22525	-1.1723	-1.56213	0.0029	0.0145	< 0.001	0.0290431	0.0888838	7.5387e-05
SNOWBALL_024482_s_st	HERC4	7.03372	6.74046	6.60384	6.62985	1.2254	-1.09933	-1.07968	0.0002	0.0438	0.0954	0.00468484	0.186102	0.303115
SNOWBALL_030111_st	GMPS	8.45142	8.15803	8.10592	8.14164	1.22552	-1.03678	-1.01142	< 0.001	0.3529	0.7674	0.00167141	0.629937	0.902179
SNOWBALL_040839_st	LMNB2	6.06676	5.77263	5.75104	5.8016	1.22615	-1.01507	1.02029	0.002	0.79	0.7209	0.0217964	0.912975	0.879367
SNOWBALL_002674_st	ASH1L,LOC106510135	7.21748	6.92333	6.87509	6.78057	1.22616	-1.03401	-1.10402	0.0005	0.4902	0.053	0.00852886	0.740334	0.210143
SNOWBALL_022015_s_st	INTS12	7.31766	7.0228	7.10902	6.90439	1.22677	1.06159	-1.08554	0.0052	0.3582	0.2122	0.043556	0.634782	0.480912
SNOWBALL_002879_st	PLAA	7.17252	6.87761	6.73115	6.36006	1.22681	-1.10685	-1.43152	< 0.001	0.0091	< 0.001	0.000722145	0.064629	3.8733e-06
SNOWBALL_010456_st	EIF2S1	7.73674	7.44165	7.42408	7.46762	1.22696	-1.01225	1.01817	< 0.001	0.7312	0.6123	0.000830688	0.884543	0.819981
SNOWBALL_009720_st	SLA-2,SLA-3	6.51466	6.21863	6.17054	6.03285	1.22777	-1.03389	-1.13743	0.005	0.6047	0.0582	0.04258	0.815341	0.223116
SNOWBALL_000393_s_st	DUSP1	9.50242	9.20636	9.05529	8.73755	1.22779	-1.11039	-1.38396	0.0044	0.1107	< 0.001	0.0389934	0.331191	0.00207128
SNOWBALL_043976_st	UBE2Z	4.73315	4.43692	4.46648	4.44596	1.22792	1.0207	1.00628	0.0043	0.7442	0.9204	0.0379542	0.891189	0.970042
SNOWBALL_025994_s_st	RAB23	6.72761	6.43091	6.51262	6.19394	1.22833	1.05827	-1.17851	0.0014	0.3038	0.0072	0.0168967	0.583839	0.0545721
SNOWBALL_027229_st	ATP13A3	7.45653	7.15968	7.09165	7.05824	1.22846	-1.04828	-1.07284	0.0061	0.4799	0.2968	0.0489202	0.732859	0.576871
SNOWBALL_011402_st	RELL1	7.0931	6.79579	6.39192	6.09392	1.22885	-1.32305	-1.62661	0.0002	< 0.001	< 0.001	0.00378832	0.000315685	1.65945e-06
SNOWBALL_009869_st	SLC29A1	9.64061	9.34324	9.09454	8.65099	1.2289	-1.18814	-1.6158	0.0004	0.002	< 0.001	0.00728622	0.0219535	4.71924e-06
SNOWBALL_013549_st	FRMD4A	8.68433	8.38656	7.91436	7.49636	1.22924	-1.38723	-1.85344	0.005	< 0.001	< 0.001	0.0426248	0.00235686	7.97029e-06
SNOWBALL_012417_s_st	LOC106508151	6.492	6.19344	6.18894	6.02731	1.22992	-1.00313	-1.12205	0.0056	0.9622	0.0944	0.0461829	0.985791	0.301136
SNOWBALL_001246_s_st	BAG6	9.33695	9.03837	8.69032	8.58741	1.22994	-1.27283	-1.36694	0.0045	0.0014	0.0001	0.0396803	0.0172503	0.00304449
SNOWBALL_017230_s_st	ADD3	7.86205	7.56276	7.58623	7.62135	1.23054	1.0164	1.04145	0.0002	0.7075	0.3544	0.0036	0.872588	0.631246
SNOWBALL_005789_s_st	RAD54B	5.02464	4.72464	4.19397	4.08481	1.23114	-1.4446	-1.55815	0.0052	< 0.001	< 0.001	0.0439182	0.00104055	0.00020743
SNOWBALL_003138_st	DPP8	7.27119	6.97082	6.98525	6.83061	1.23147	1.01006	-1.10206	< 0.001	0.7704	0.0108	0.000541116	0.903654	0.0727969
SNOWBALL_021977_st	TIPARP	7.81965	7.5186	7.30936	7.2783	1.23204	-1.15608	-1.18123	< 0.001	0.0017	0.0005	0.00159591	0.0194469	0.00826142
SNOWBALL_017998_st	INPP1	7.1704	6.86927	6.53023	6.473	1.23211	-1.26492	-1.3161	0.0047	0.002	0.0005	0.0405113	0.0215711	0.0083097
SNOWBALL_042439_st	APBB2	7.77837	7.47706	7.06243	6.92184	1.23226	-1.33296	-1.46939	0.0004	< 0.001	< 0.001	0.00690083	0.00058724	4.14545e-05
SNOWBALL_031451_st		4.82172	4.52026	4.43594	4.25491	1.23239	-1.06019	-1.20192	0.0054	0.382	0.0121	0.044946	0.655445	0.0785449
SNOWBALL_002422_s_st	LAMA4	6.8356	6.5339	6.60039	6.3689	1.2326	1.04717	-1.12117	0.0059	0.4943	0.1018	0.0477328	0.743178	0.315066
SNOWBALL_014491_st	PSMD11	9.79369	9.49182	9.37179	9.49041	1.23274	-1.08676	-1.00098	0.0011	0.1331	0.9854	0.0140158	0.369009	0.994486
SNOWBALL_035784_st	CD99	5.22537	4.92345	4.98557	4.61575	1.23278	1.044	-1.23774	0.0047	0.5088	0.0041	0.0405068	0.753318	0.0368188
SNOWBALL_006992_s_st	ANKRD52	7.45068	7.14793	7.02173	6.87554	1.23349	-1.09141	-1.20781	< 0.001	0.0233	< 0.001	0.000675924	0.122545	0.00161031
SNOWBALL_039899_st	CITED2	3.78317	3.48034	3.52729	3.77699	1.23356	1.03308	1.22829	0.0062	0.6319	0.0071	0.0493382	0.831317	0.0541859
SNOWBALL_017705_s_st	DDX18	7.54481	7.2418	7.18248	7.23127	1.23372	-1.04197	-1.00732	< 0.001	0.3218	0.8583	0.00212595	0.601268	0.943956
SNOWBALL_012755_s_st	ETS1	8.59901	8.2959	8.09039	7.84728	1.2338	-1.15309	-1.36473	0.0005	0.0096	< 0.001	0.0081616	0.0672171	0.000390185
SNOWBALL_005181_s_st	LCLAT1	8.64981	8.34637	8.32474	8.11568	1.23409	-1.01511	-1.17339	0.0031	0.8076	0.0178	0.0304043	0.921163	0.102295
SNOWBALL_011412_st	GNPDA2	6.72408	6.42053	6.51505	6.48972	1.23419	1.06772	1.04913	0.0018	0.2625	0.4078	0.0205489	0.540444	0.677021
SNOWBALL_003833_st		7.35603	7.05234	7.21666	6.99378	1.2343	1.12064	-1.04142	< 0.001	0.0123	0.3297	0.00215269	0.0794378	0.608729
SNOWBALL_030313_st	APBB1IP	7.35696	7.05296	6.88925	6.69306	1.23457	-1.12016	-1.28334	0.0009	0.0449	0.0002	0.0127754	0.189173	0.00410905
SNOWBALL_009294_st	PGD	8.18284	7.87864	7.51818	7.24847	1.23473	-1.28383	-1.54775	< 0.001	< 0.001	< 0.001	0.00144863	0.000346688	1.7355e-06
SNOWBALL_004150_s_st	PTGES	6.91919	6.61472	6.54419	6.20423	1.23497	-1.0501	-1.32913	0.0044	0.4538	0.0004	0.0387105	0.713546	0.00665748
SNOWBALL_017150_s_st	NUP133	6.63419	6.32951	6.32889	6.14858	1.23515	-1.00043	-1.13361	0.0023	0.9942	0.047	0.0242136	0.997824	0.194895
SNOWBALL_019956_st	DDX56	7.04927	6.74362	6.80699	6.92934	1.23598	1.04491	1.13739	0.0015	0.4402	0.0339	0.0179653	0.703072	0.157663
SNOWBALL_042332_st	SFPQ	6.78641	6.48074	6.40059	6.37878	1.23599	-1.05713	-1.07323	0.0056	0.4139	0.3017	0.0459365	0.681993	0.58186
SNOWBALL_023680_st	CTNNBL1	5.68649	5.37977	5.319	5.20555	1.23689	-1.04302	-1.12835	0.0014	0.4577	0.0444	0.01734	0.71656	0.187748
SNOWBALL_018160_st	ORC2	5.43594	5.12898	5.22172	5.17598	1.23711	1.0664	1.03312	0.0011	0.2463	0.5505	0.0139548	0.522427	0.781394
SNOWBALL_022203_st	FBXO28	6.9382	6.6312	6.7793	6.7489	1.23713	1.10811	1.085	0.0023	0.1001	0.1844	0.0244007	0.311804	0.44488
SNOWBALL_006196_st	TTF2	6.58509	6.27788	5.9051	5.60277	1.23731	-1.29484	-1.59671	0.0002	< 0.001	< 0.001	0.00332467	0.000720238	2.81762e-06
SNOWBALL_001518_st	TRAF3	7.55442	7.2471	7.00926	6.85417	1.23741	-1.17923	-1.31306	0.0016	0.0098	0.0002	0.0187669	0.0677932	0.00374914
SNOWBALL_007190_st	ALG10	7.28837	6.98102	6.71208	6.50841	1.23743	-1.20493	-1.38762	0.0006	0.0018	< 0.001	0.00919954	0.0207397	0.000328494
SNOWBALL_006899_st	MMP19	6.81357	6.50557	6.46469	6.25556	1.238	-1.02874	-1.18921	0.0025	0.642	0.0105	0.026187	0.837108	0.0711333
SNOWBALL_024053_s_st	DDX18	7.26849	6.96027	6.96525	7.10357	1.23818	1.00346	1.10443	0.0009	0.9484	0.0768	0.0122471	0.980763	0.265255
SNOWBALL_005776_st	LRRCC1	6.59855	6.28993	6.14947	5.90957	1.23852	-1.10226	-1.30167	0.0011	0.0905	0.0002	0.0144719	0.293282	0.003558
SNOWBALL_011924_st	BDH2	6.92265	6.61279	6.55967	6.63827	1.23959	-1.0375	1.01782	0.0012	0.5106	0.751	0.0152501	0.754544	0.894505
SNOWBALL_031225_st	UTP4	8.51461	8.20467	8.39927	8.44994	1.23966	1.14441	1.18531	0.0011	0.0242	0.0064	0.0143819	0.125833	0.0503889
SNOWBALL_033303_st	DPYSL2	8.05143	7.74117	7.50879	7.01815	1.23993	-1.17477	-1.65064	< 0.001	0.0013	< 0.001	0.00225826	0.016313	9.66571e-07
SNOWBALL_000672_st	IL4R	7.25917	6.9481	6.94402	6.78539	1.24063	-1.00284	-1.11939	0.0052	0.9666	0.1099	0.0435253	0.987383	0.329815
SNOWBALL_011602_s_st	LOC110262113	5.47872	5.167	4.87277	4.53646	1.24119	-1.22623	-1.54815	0.004	0.0059	< 0.001	0.036281	0.048041	0.000236272
SNOWBALL_025845_s_st	ABCF3	5.65104	5.33931	5.5246	5.4663	1.24119	1.13705	1.09201	0.0045	0.067	0.1968	0.0391946	0.243929	0.461229
SNOWBALL_018213_s_st	GTF3C3	6.95445	6.64219	6.58987	6.53175	1.24165	-1.03693	-1.07956	0.0005	0.4743	0.1414	0.0076793	0.728799	0.382397
SNOWBALL_021933_s_st	RNASEH2B	7.8789	7.56586	7.37927	7.04948	1.24232	-1.13807	-1.43036	0.0057	0.0754	< 0.001	0.0465998	0.262487	0.00200878
SNOWBALL_001924_s_st	GPC4	7.12253	6.8094	6.68055	6.54102	1.2424	-1.09343	-1.20446	< 0.001	0.0347	0.0002	0.00120875	0.160006	0.00396069
SNOWBALL_032220_st	FRMD4A	8.14075	7.82756	7.47469	7.03499	1.24246	-1.2771	-1.73215	0.002	0.0008	< 0.001	0.0220398	0.0108143	1.19083e-05
SNOWBALL_006354_s_st	ILF2	7.92546	7.61158	7.46853	7.41693	1.24304	-1.10424	-1.14444	0.0002	0.0392	0.0075	0.00329681	0.173331	0.0565904
SNOWBALL_032326_st	NRP1	8.98729	8.67308	8.36273	8.34252	1.24332	-1.24001	-1.2575	0.0014	0.0016	0.0009	0.0172164	0.0184786	0.0126672
SNOWBALL_012461_x_st	RNF214	6.39437	6.08009	5.83115	5.66482	1.24339	-1.18834	-1.33355	< 0.001	0.0002	< 0.001	0.000724968	0.00448151	5.96788e-05
SNOWBALL_027586_st	ELK3	9.11843	8.80394	8.63806	8.32428	1.24357	-1.12185	-1.39441	0.0001	0.0191	< 0.001	0.00322906	0.10711	9.08429e-05
SNOWBALL_003106_st	SPATA5L1	5.528	5.2129	5.0939	5.01305	1.2441	-1.08598	-1.14857	0.0002	0.0919	0.0083	0.00435232	0.296299	0.0605641
SNOWBALL_011462_st	DCK	7.26482	6.94959	6.69625	6.38303	1.24421	-1.19196	-1.48099	0.0026	0.0114	< 0.001	0.0269136	0.0756801	0.000405376
SNOWBALL_011829_st	HSPA4L	7.44798	7.13267	7.16331	7.40549	1.24428	1.02147	1.20817	0.0025	0.7325	0.0069	0.0258951	0.885248	0.0533867
SNOWBALL_015405_s_st	GNL3	7.98011	7.66468	7.54541	7.49346	1.24438	-1.08618	-1.12601	< 0.001	0.0123	0.0009	9.91206e-05	0.079277	0.0125549
SNOWBALL_005330_st	LOC100623228	8.12756	7.8116	7.48335	7.40911	1.24484	-1.25549	-1.32179	0.0001	< 0.001	< 0.001	0.00295939	0.0022152	0.000414667
SNOWBALL_045804_st	TMEM231	4.70064	4.38455	4.56829	4.4692	1.24495	1.13583	1.06043	0.003	0.0592	0.3633	0.0294719	0.22556	0.639206
SNOWBALL_022127_st	AKAP13	6.54393	6.22763	6.35804	6.23921	1.24513	1.0946	1.00805	0.0053	0.2022	0.9075	0.0442233	0.468491	0.964511
SNOWBALL_039328_st	LOC102167132	1.89169	1.57484	1.44705	1.57636	1.24561	-1.09262	1.00105	0.0015	0.1429	0.9856	0.0179061	0.384762	0.994552
SNOWBALL_022093_st		8.81626	8.4993	8.74427	8.62629	1.2457	1.18506	1.09201	0.0016	0.01	0.1496	0.0190769	0.0689818	0.394872
SNOWBALL_016525_s_st	GTF2H3	6.50155	6.18432	6.28641	6.39192	1.24594	1.07333	1.15477	0.0003	0.1588	0.0084	0.00549678	0.408822	0.0610093
SNOWBALL_003084_st	TIPIN	6.83205	6.51472	6.33772	6.32995	1.24602	-1.13053	-1.13664	0.005	0.0883	0.0764	0.0424061	0.288926	0.26442
SNOWBALL_001250_st	BAG6	7.74667	7.42837	7.24531	7.21174	1.24686	-1.13529	-1.16201	0.0002	0.0144	0.005	0.00416595	0.0883116	0.0426747
SNOWBALL_009495_st	SNRNP48	7.30386	6.98556	6.95808	7.01521	1.24686	-1.01923	1.02077	0.0011	0.7367	0.7168	0.0143772	0.887479	0.877413
SNOWBALL_012698_s_st	FAM185A	5.85171	5.53288	5.46349	5.30767	1.24732	-1.04927	-1.16895	0.0006	0.3674	0.0083	0.00910861	0.64284	0.0605288
SNOWBALL_044118_st		2.38413	2.06439	2.20065	2.29415	1.24811	1.09906	1.17264	0.0056	0.1918	0.0354	0.0460428	0.454831	0.162208
SNOWBALL_031565_st	GSG2	6.6604	6.34056	5.64517	4.87339	1.24819	-1.61933	-2.76479	0.0017	< 0.001	< 0.001	0.0195012	4.17473e-05	3.06768e-08
SNOWBALL_040262_st	IPMK	4.36736	4.04737	4.27005	3.88317	1.24832	1.1669	-1.12055	0.0027	0.0255	0.0881	0.027483	0.130162	0.288531
SNOWBALL_025443_s_st	ASH2L	6.43968	6.11944	6.10136	6.0674	1.24854	-1.01261	-1.03673	0.001	0.8245	0.5255	0.0137229	0.929078	0.76481
SNOWBALL_016650_s_st	TOP3B	5.62196	5.30169	5.33356	5.32617	1.24857	1.02234	1.01712	0.0033	0.7364	0.7958	0.0319179	0.887305	0.915894
SNOWBALL_036746_st	EBF3	6.92631	6.60569	6.46807	6.6419	1.24887	-1.10009	1.02541	< 0.001	0.0412	0.5673	0.00229091	0.178903	0.792147
SNOWBALL_032174_st	PLCB1	4.5282	4.20722	4.14373	3.9308	1.24918	-1.04499	-1.21118	0.0043	0.5196	0.0112	0.0378686	0.760779	0.0745191
SNOWBALL_017143_s_st	MAPK8	7.18516	6.86403	6.69249	6.61197	1.24931	-1.12626	-1.19091	0.0011	0.0488	0.0064	0.0137614	0.1997	0.050607
SNOWBALL_023320_s_st	PTGDR,PTGER2	8.10727	7.78613	7.40899	7.03417	1.24932	-1.29876	-1.68408	0.0004	< 0.001	< 0.001	0.00706053	0.00219186	4.27663e-06
SNOWBALL_006750_st	L3MBTL2	6.93776	6.61639	6.52133	6.34361	1.24952	-1.06811	-1.20813	< 0.001	0.0656	< 0.001	0.000272582	0.240817	0.00110549
SNOWBALL_001814_s_st	AMOT	6.45469	6.13209	5.75743	5.41927	1.25059	-1.29653	-1.63899	0.0011	0.0003	< 0.001	0.0141808	0.00532604	2.14343e-05
SNOWBALL_016305_s_st	EBF2	6.99563	6.67269	6.55484	6.45525	1.25087	-1.08512	-1.16267	0.0007	0.1484	0.0128	0.0106398	0.393062	0.0816236
SNOWBALL_011800_s_st	ABCG2	7.41117	7.08771	6.77569	6.3447	1.25132	-1.24145	-1.67367	0.0037	0.0048	< 0.001	0.034601	0.0414475	6.73343e-05
SNOWBALL_024348_s_st	NAA25	7.12094	6.79662	7.12207	7.27068	1.25207	1.25305	1.38901	0.0001	< 0.001	< 0.001	0.00246947	0.00240502	9.65467e-05
SNOWBALL_001938_s_st	RBMX	8.45963	8.135	7.93615	7.92368	1.25234	-1.14779	-1.15775	0.0005	0.0173	0.0123	0.00816464	0.100341	0.0794524
SNOWBALL_000874_st	S100A8	1.68957	1.36416	1.42388	1.41048	1.25302	1.04226	1.03263	0.0031	0.532	0.627	0.0300726	0.769189	0.828531
SNOWBALL_013110_st	DIEXF	6.41313	6.08585	6.01651	6.09961	1.25465	-1.04923	1.00959	0.0006	0.3816	0.8604	0.0093203	0.655127	0.944817
SNOWBALL_009273_st	CEP192	6.38666	6.05898	6.03666	5.88133	1.25499	-1.01559	-1.13104	0.0062	0.8327	0.1068	0.0492406	0.932747	0.324215
SNOWBALL_042405_st	LOC100625214	5.24733	4.9188	4.59771	4.71305	1.25573	-1.24927	-1.15328	0.004	0.0047	0.0516	0.0361868	0.0405753	0.206544
SNOWBALL_014699_st	INTS2	6.82392	6.49516	6.48092	6.41688	1.25594	-1.00992	-1.05575	< 0.001	0.806	0.1888	0.000968427	0.920419	0.450821
SNOWBALL_011387_st	APBB2	8.01042	7.68109	7.2588	7.06839	1.25643	-1.34006	-1.52912	0.0004	< 0.001	< 0.001	0.00626966	0.000949203	3.32625e-05
SNOWBALL_007352_st	PKP2	4.08752	3.75796	3.64447	3.53683	1.25663	-1.08184	-1.16564	0.0049	0.2782	0.0439	0.0420265	0.557601	0.186453
SNOWBALL_000346_s_st	PAPSS2	9.76643	9.43681	9.31807	9.06687	1.25668	-1.08578	-1.2923	0.0018	0.1985	0.0007	0.0207463	0.463574	0.0103503
SNOWBALL_001119_s_st	NRM	7.48127	7.15055	6.40184	5.53271	1.25765	-1.68028	-3.06914	0.006	< 0.001	< 0.001	0.0482281	0.000144383	8.12091e-08
SNOWBALL_019062_s_st	PLCB1	8.14961	7.81885	7.69191	7.55106	1.25768	-1.09197	-1.20396	0.0001	0.0744	0.001	0.00308476	0.260394	0.0130592
SNOWBALL_017025_s_st	TSNAX	7.51067	7.17963	7.05847	6.55814	1.25792	-1.08761	-1.53847	< 0.001	0.0697	< 0.001	0.00186486	0.249891	6.20388e-06
SNOWBALL_025413_st	CSE1L	8.45473	8.12341	8.05213	7.91114	1.25816	-1.05065	-1.15851	0.0007	0.3814	0.0164	0.0102817	0.655002	0.0967669
SNOWBALL_002637_st	LOC100516636	9.82236	9.48963	9.61952	9.48261	1.25939	1.09421	-1.00488	0.0002	0.0803	0.9209	0.00411248	0.272551	0.970206
SNOWBALL_034329_st	ETS1	5.81345	5.47973	5.38266	5.12868	1.26026	-1.0696	-1.27549	0.0002	0.176	0.0001	0.00362754	0.433177	0.00247979
SNOWBALL_004748_st	EMP2	6.72532	6.39133	6.15114	5.64711	1.2605	-1.18115	-1.67507	0.0003	0.0041	< 0.001	0.00497273	0.0366407	4.23547e-06
SNOWBALL_016339_s_st	EBF2	7.5309	7.19686	7.10305	6.88894	1.26054	-1.06718	-1.23792	< 0.001	0.1404	0.0001	0.00137091	0.380691	0.00257956
SNOWBALL_013541_st	MAP3K8	6.10656	5.77225	5.85528	5.86558	1.26077	1.05924	1.06683	0.0026	0.3891	0.3345	0.0264523	0.661464	0.613007
SNOWBALL_002801_s_st	PTGDR,PTGER2	8.25824	7.92389	7.59345	7.15245	1.26081	-1.25739	-1.70696	0.0005	0.0006	< 0.001	0.00809516	0.00875772	5.98861e-06
SNOWBALL_031746_st	PLCB1	6.32554	5.98979	5.99784	5.72003	1.26203	1.00559	-1.20561	0.0003	0.9149	0.0022	0.0060252	0.967701	0.0235333
SNOWBALL_026429_st	EHD4	8.25058	7.91461	8.01778	7.835	1.26222	1.07413	-1.05673	0.0009	0.2325	0.3525	0.012761	0.505935	0.629582
SNOWBALL_021842_st	GNL2	8.92544	8.58899	8.57462	8.5611	1.26264	-1.01002	-1.01952	< 0.001	0.7389	0.52	5.62758e-05	0.888578	0.760996
SNOWBALL_012254_st	PGM2L1	5.69701	5.36048	5.45719	5.35659	1.26272	1.06934	-1.0027	0.0028	0.3268	0.9681	0.0283292	0.606031	0.987941
SNOWBALL_010085_s_st	SLC29A1	9.70702	9.36839	9.13342	8.77504	1.26456	-1.17688	-1.50874	< 0.001	< 0.001	< 0.001	7.8899e-05	0.00186398	3.42592e-07
SNOWBALL_024679_s_st	DDX21	8.49692	8.1578	8.1015	8.15102	1.26498	-1.0398	-1.00471	< 0.001	0.2875	0.8962	0.000292635	0.567301	0.959911
SNOWBALL_012350_st	SIK3	7.41406	7.07446	6.6062	6.43431	1.26541	-1.38345	-1.5585	0.0013	< 0.001	< 0.001	0.0164373	0.00177772	0.000121008
SNOWBALL_046294_st	MEIS1	6.81739	6.47746	6.34742	6.48419	1.26569	-1.09432	1.00468	0.0021	0.1803	0.9431	0.0227995	0.439143	0.978723
SNOWBALL_001933_s_st		8.5888	8.24871	8.01521	8.10475	1.26584	-1.17568	-1.10493	0.0026	0.0262	0.1504	0.0263032	0.132565	0.396183
SNOWBALL_021216_s_st	LOC102161308	8.9706	8.63043	8.29508	8.12043	1.26591	-1.26168	-1.42405	0.0009	0.001	< 0.001	0.0120756	0.0131776	0.000589638
SNOWBALL_038111_st	SIK3	7.88945	7.54923	7.25266	7.10356	1.26596	-1.22822	-1.36194	0.0022	0.0059	0.0002	0.0237096	0.0479696	0.00423386
SNOWBALL_013009_st	PRDX6	9.51582	9.17506	9.17506	8.93297	1.26643	-1	-1.18271	0.0001	1	0.0029	0.00325669	0.999998	0.0288893
SNOWBALL_023852_s_st	ARL6IP6	8.17831	7.83671	7.93103	7.84098	1.26716	1.06756	1.00297	0.0004	0.2355	0.9561	0.00669886	0.509619	0.9836
SNOWBALL_005031_st	GEMIN6	5.31411	4.97248	5.1673	5.18714	1.26719	1.14459	1.16044	0.0054	0.0855	0.0605	0.0449785	0.283446	0.228668
SNOWBALL_000489_s_st	LOC106507695,LOC100158035	6.42651	6.08425	5.60907	5.03625	1.26774	-1.39009	-2.06767	0.0047	0.0003	< 0.001	0.0406197	0.0058011	5.76337e-06
SNOWBALL_028002_st	GNG2	7.28436	6.94185	6.73246	6.60175	1.26796	-1.1562	-1.26584	0.0012	0.0291	0.0013	0.0153516	0.142375	0.0160298
SNOWBALL_018632_st	C16H5orf34	5.57194	5.22913	5.03003	4.66407	1.26822	-1.14799	-1.47945	0.0047	0.0747	< 0.001	0.0406001	0.260941	0.00161508
SNOWBALL_045163_st	ECT2	6.64174	6.29842	6.08318	5.75188	1.26867	-1.1609	-1.46058	0.0014	0.0285	< 0.001	0.0173449	0.14016	0.000589117
SNOWBALL_013940_st	ING1	5.56442	5.22105	5.20811	5.14465	1.26871	-1.00901	-1.05439	0.0013	0.8857	0.4013	0.0164612	0.955524	0.671609
SNOWBALL_012159_st	TRIM21	5.32347	4.9799	5.44229	5.20782	1.26889	1.37782	1.17114	0.0045	0.0004	0.0435	0.0392722	0.00686907	0.185259
SNOWBALL_021914_st	ANGPTL1	2.17793	1.83424	1.55781	1.56181	1.26899	-1.21119	-1.20784	0.0051	0.019	0.0205	0.0430961	0.106866	0.112596
SNOWBALL_021800_st	MBNL1	8.81537	8.47131	8.22623	8.09496	1.26933	-1.18516	-1.29805	< 0.001	0.0019	< 0.001	0.0021759	0.0212241	0.00106706
SNOWBALL_011771_st	NFKB1	7.13115	6.78701	6.69048	6.70337	1.26939	-1.0692	-1.05969	0.0004	0.2321	0.2978	0.00708083	0.50551	0.57794
SNOWBALL_009548_st	TPMT	7.36547	7.02048	6.94074	6.79899	1.27015	-1.05682	-1.16594	0.0004	0.314	0.0107	0.00635699	0.593789	0.0722886
SNOWBALL_024619_s_st	PAPSS2	9.51611	9.17041	9.04696	8.74271	1.27077	-1.08933	-1.34508	0.0005	0.1402	< 0.001	0.00801096	0.380493	0.0016982
SNOWBALL_015703_st	MBNL1	10.9986	10.6528	10.4272	10.2626	1.27083	-1.16929	-1.31058	< 0.001	0.0012	< 0.001	0.000659012	0.014945	0.000230579
SNOWBALL_027899_st	DRG2	7.05903	6.71306	6.51185	6.36744	1.271	-1.14966	-1.2707	0.0005	0.0227	0.0005	0.00813745	0.120289	0.00818896
SNOWBALL_030391_st	PTPN9	6.37092	6.02465	5.99903	5.81098	1.27127	-1.01791	-1.15963	0.0005	0.751	0.016	0.00778682	0.894454	0.0950613
SNOWBALL_001927_s_st	RBMX	7.65673	7.30963	7.34863	7.042	1.272	1.02741	-1.20383	0.0007	0.6444	0.0053	0.0102553	0.838449	0.0441038
SNOWBALL_033090_st	MTFR1	7.40787	7.0602	6.89982	6.78862	1.2725	-1.11758	-1.20713	< 0.001	0.0134	0.0002	0.000670854	0.0844164	0.00464431
SNOWBALL_008695_st	CA10,LOC110256026	6.89674	6.5485	6.19908	6.03631	1.273	-1.27405	-1.42622	0.0026	0.0025	< 0.001	0.0263449	0.0258621	0.0020516
SNOWBALL_021793_st	BIRC3	6.78777	6.43948	6.49521	6.53038	1.27305	1.03939	1.06503	0.0004	0.4814	0.257	0.00629574	0.73396	0.534289
SNOWBALL_039047_st	LOC110261309	5.81481	5.46637	5.58377	5.59936	1.27318	1.08478	1.09657	0.0021	0.2346	0.1809	0.0226871	0.508594	0.43994
SNOWBALL_024804_s_st	ACSL5	8.1446	7.79464	7.71621	7.75593	1.27452	-1.05587	-1.0272	0.0008	0.3696	0.6548	0.0113508	0.644866	0.844347
SNOWBALL_000310_s_st	CDC45	6.09182	5.74159	5.33361	4.83556	1.27476	-1.32683	-1.87389	0.0051	0.0016	< 0.001	0.0429407	0.0190252	3.28701e-05
SNOWBALL_042101_st	INCENP	6.62562	6.27449	5.90484	5.76832	1.27556	-1.29204	-1.42027	0.0049	0.0034	0.0002	0.0418067	0.0322424	0.00464272
SNOWBALL_009163_st	USP1	7.49394	7.14267	6.82508	6.65172	1.27569	-1.24624	-1.40536	< 0.001	0.0002	< 0.001	0.00181357	0.00389382	0.00010063
SNOWBALL_003655_st	RFK	8.72275	8.37112	7.9838	7.84992	1.276	-1.30796	-1.43515	0.0008	0.0003	< 0.001	0.0115363	0.00609965	0.000609892
SNOWBALL_020843_st	FAM122B	7.49615	7.14432	6.69736	6.20288	1.27617	-1.36317	-1.92044	0.0001	< 0.001	< 0.001	0.00281748	0.000400825	3.29851e-07
SNOWBALL_016318_s_st	SPOCK3	5.24525	4.89308	4.40081	3.98166	1.27648	-1.40666	-1.8809	0.0061	0.0004	< 0.001	0.0489202	0.00724253	4.25714e-05
SNOWBALL_036877_st	PSMD11	8.00396	7.6516	7.6711	7.6301	1.27664	1.01361	-1.01502	0.0003	0.802	0.7823	0.00538175	0.918779	0.909298
SNOWBALL_001406_s_st	TAP1	6.08788	5.73548	5.76837	5.71196	1.27668	1.02306	-1.01644	0.0051	0.7663	0.8316	0.0433104	0.901715	0.9322
SNOWBALL_015175_st	ANKRD28	7.78666	7.4338	7.28603	6.79175	1.27709	-1.10785	-1.56055	< 0.001	0.0427	< 0.001	0.00201753	0.18306	9.21562e-06
SNOWBALL_027398_st	HSPA4L	6.59142	6.23688	6.24648	6.39432	1.27858	1.00668	1.11531	0.0012	0.9163	0.099	0.0148028	0.968303	0.309866
SNOWBALL_005879_st	DPT	8.12287	7.76676	7.23187	6.58956	1.27997	-1.44884	-2.26138	0.0006	< 0.001	< 0.001	0.00955911	0.000422735	2.25345e-07
SNOWBALL_024531_s_st	NUP133	6.47345	6.11712	5.99694	6.08379	1.28016	-1.08688	-1.02338	< 0.001	0.0678	0.5945	0.000911944	0.245762	0.809002
SNOWBALL_026548_s_st	USP16	7.96103	7.60457	7.68193	7.59483	1.28028	1.05509	-1.00677	0.0017	0.4265	0.9195	0.0196552	0.692191	0.969627
SNOWBALL_009637_st		6.65735	6.30057	6.02391	6.06373	1.28056	-1.21139	-1.17842	0.0011	0.0073	0.0181	0.0143387	0.0551028	0.103473
SNOWBALL_032450_st		3.59762	3.24083	3.46605	3.24336	1.28057	1.16895	1.00175	0.0005	0.015	0.976	0.00836853	0.0908488	0.990962
SNOWBALL_027246_st	SMC1A	6.05168	5.69464	5.45092	5.15235	1.2808	-1.18405	-1.45629	0.0022	0.0241	< 0.001	0.02331	0.125413	0.00133711
SNOWBALL_004024_st	TOMM5	5.81359	5.45653	5.33003	5.28925	1.28081	-1.09165	-1.12294	0.0004	0.1307	0.0513	0.00636957	0.365119	0.205895
SNOWBALL_036200_st		4.5929	4.23561	4.17024	3.88792	1.28102	-1.04635	-1.27252	0.0032	0.5347	0.0039	0.030625	0.771043	0.0353406
SNOWBALL_000919_st	CBX5	8.34663	7.98914	7.78899	7.66674	1.2812	-1.14882	-1.25041	0.0001	0.0134	0.0004	0.00313237	0.0843159	0.00658163
SNOWBALL_003391_st	ST6GALNAC4	6.86521	6.5067	6.60102	6.56895	1.2821	1.06756	1.04409	0.0002	0.2348	0.4272	0.00472854	0.508808	0.692805
SNOWBALL_000596_s_st	MET	7.0195	6.66077	6.341	6.01002	1.2823	-1.24813	-1.56998	0.0003	0.0008	< 0.001	0.00549838	0.011791	3.53997e-05
SNOWBALL_021368_st	TNPO2	5.97546	5.61576	5.80541	5.72608	1.28316	1.14048	1.07947	0.005	0.1055	0.3331	0.0423943	0.321862	0.61183
SNOWBALL_006593_st		7.30413	6.94417	6.69021	6.40994	1.28339	-1.19248	-1.44817	< 0.001	0.0003	< 0.001	0.000391487	0.00610652	9.72559e-06
SNOWBALL_002442_st	C1H18orf54	6.01816	5.65784	5.3166	5.12088	1.28371	-1.26684	-1.45091	0.005	0.0071	0.0002	0.0423842	0.0545515	0.00372273
SNOWBALL_031266_st	LOC106504991	5.76676	5.40623	5.03736	5.09743	1.2839	-1.29133	-1.23867	0.0042	0.0036	0.0114	0.0375655	0.0334174	0.0756449
SNOWBALL_016522_st	PPP1CC	8.89129	8.53073	8.37503	8.39673	1.28393	-1.11396	-1.09733	0.0001	0.0433	0.0772	0.00261706	0.184705	0.266101
SNOWBALL_004610_st	ANAPC1	6.93478	6.57406	6.44495	6.4341	1.28407	-1.09362	-1.10188	< 0.001	0.0581	0.0418	0.00105697	0.222934	0.180722
SNOWBALL_023025_s_st	RTCB	7.48668	7.12594	7.11152	7.106	1.28408	-1.01005	-1.01392	0.0003	0.8584	0.8053	0.00601378	0.944014	0.920111
SNOWBALL_009801_st	LOC110261483	7.37519	7.01359	6.44477	5.92045	1.28485	-1.48331	-2.13338	0.0057	0.0001	< 0.001	0.0465046	0.00287602	8.53546e-06
SNOWBALL_016968_s_st	ACSL5	7.18341	6.82108	6.83967	6.85101	1.2855	1.01296	1.02096	< 0.001	0.7713	0.6404	0.00096981	0.904111	0.836275
SNOWBALL_036960_st	RNPS1	6.9733	6.61039	6.70634	6.82446	1.28602	1.06877	1.15995	0.0011	0.3102	0.0327	0.0143599	0.590227	0.153944
SNOWBALL_011419_st	GUF1	6.44257	6.07966	6.01679	6.08289	1.28602	-1.04454	1.00224	< 0.001	0.1915	0.945	6.06003e-05	0.454365	0.979477
SNOWBALL_031477_st	WDR59	4.23352	3.87052	4.4093	4.42752	1.2861	1.45275	1.47121	0.0049	0.0002	0.0001	0.0416955	0.00373902	0.00291704
SNOWBALL_010550_st	PTPN9	7.65733	7.2937	7.12952	6.92675	1.28666	-1.12053	-1.28962	< 0.001	0.0235	< 0.001	0.00132599	0.123132	0.00123282
SNOWBALL_045246_s_st	DIP2A	7.2201	6.85623	7.08309	6.95842	1.28687	1.17029	1.07341	0.0023	0.0379	0.3233	0.0239994	0.169714	0.60268
SNOWBALL_040561_st	ELK3	9.02369	8.65967	8.48805	8.21857	1.287	-1.12632	-1.35764	< 0.001	0.0085	< 0.001	0.000419748	0.0616306	7.40911e-05
SNOWBALL_020779_s_st	SLC25A5	8.88907	8.5247	8.16953	7.8035	1.28732	-1.27913	-1.64855	< 0.001	< 0.001	< 0.001	0.00197328	0.00240418	4.01268e-06
SNOWBALL_047216_s_st	DUS2	8.07591	7.71126	7.69217	7.42908	1.28757	-1.01331	-1.21602	< 0.001	0.7512	0.0002	0.00055039	0.89458	0.00419873
SNOWBALL_042681_st		5.32967	4.9648	4.96185	4.5646	1.28777	-1.00205	-1.31969	0.0034	0.9782	0.0017	0.0320169	0.991663	0.0192535
SNOWBALL_030423_st	PHF19	5.90182	5.53645	5.22779	4.86206	1.28822	-1.23855	-1.59592	0.0026	0.0083	< 0.001	0.0264144	0.0604205	0.000311657
SNOWBALL_002125_st	PPIL4	5.63655	5.27021	5.43892	5.39737	1.28908	1.12405	1.09214	0.0033	0.1324	0.2495	0.0318962	0.367971	0.526122
SNOWBALL_009685_x_st	LOC100156937	7.74349	7.3762	6.79563	6.26197	1.28992	-1.49544	-2.16479	0.0023	< 0.001	< 0.001	0.0241905	0.00101973	2.43276e-06
SNOWBALL_009291_s_st	SRRM1	9.87448	9.50666	9.25815	9.15014	1.2904	-1.18798	-1.28033	0.0002	0.0055	0.0003	0.00439289	0.0456876	0.00547489
SNOWBALL_001237_s_st	BAG6	8.02047	7.65146	7.39267	7.26599	1.29146	-1.19648	-1.30629	0.0046	0.0348	0.0034	0.0402504	0.160433	0.0322369
SNOWBALL_006790_st	LOC100510904	6.83593	6.46638	6.12063	5.66556	1.29195	-1.27082	-1.74209	0.0008	0.0014	< 0.001	0.011028	0.0165723	1.74378e-05
SNOWBALL_034676_st	PCSK7	5.94407	5.57405	5.71915	5.63357	1.29238	1.1058	1.04212	0.0009	0.1299	0.5218	0.0121843	0.363799	0.762287
SNOWBALL_007467_st	SLC38A1	7.19846	6.82803	6.74766	6.45767	1.29274	-1.05729	-1.29267	0.0009	0.3897	0.0009	0.0121221	0.661972	0.0121366
SNOWBALL_023123_st	LOC100522842	8.76972	8.39827	8.38586	8.39985	1.29365	-1.00863	1.0011	0.0002	0.8734	0.9838	0.0037258	0.950429	0.993876
SNOWBALL_022975_st	LOC100154692	9.08384	8.71086	8.50802	8.45811	1.29503	-1.15096	-1.19147	< 0.001	0.0015	0.0002	0.000169277	0.0176177	0.00417426
SNOWBALL_007986_st	DHODH	6.30569	5.93237	6.06651	6.15757	1.29533	1.09744	1.16894	0.0014	0.1851	0.0336	0.0170081	0.445855	0.15663
SNOWBALL_017324_s_st	DDX21	9.49815	9.12473	9.03351	9.09637	1.29542	-1.06527	-1.01986	< 0.001	0.0241	0.4499	5.02146e-06	0.125345	0.710612
SNOWBALL_023814_s_st	PLCB1	7.2508	6.87721	6.76146	6.57661	1.29557	-1.08354	-1.23165	< 0.001	0.109	0.0004	0.00146693	0.328043	0.00728214
SNOWBALL_022049_st	MANSC1	6.2492	5.87534	5.38912	5.13113	1.29581	-1.40078	-1.67506	0.0021	0.0002	< 0.001	0.0229115	0.00426727	0.000124644
SNOWBALL_003272_s_st	NFIB	6.75469	6.38069	6.21341	5.93226	1.29594	-1.12293	-1.36455	< 0.001	0.0346	< 0.001	0.00232024	0.159743	0.000529405
SNOWBALL_033879_st	MYO1B	6.53768	6.16366	5.87803	5.73444	1.29597	-1.21894	-1.3465	0.0004	0.0037	0.0001	0.00683381	0.0340545	0.00251898
SNOWBALL_029432_st	SRGAP1	6.96314	6.58829	6.54328	6.54598	1.29671	-1.03169	-1.02976	0.0042	0.6945	0.712	0.0378054	0.86594	0.874919
SNOWBALL_011828_st	ABCG2	8.37559	8.00046	7.65386	7.31486	1.29695	-1.27157	-1.60838	0.0022	0.0039	< 0.001	0.0233892	0.0356688	0.000278864
SNOWBALL_023179_s_st	SERPINE2	8.79319	8.41735	7.80391	7.39462	1.2976	-1.5299	-2.03175	0.0027	< 0.001	< 0.001	0.0270367	0.00092749	8.43211e-06
SNOWBALL_001939_s_st	RBMX	7.79796	7.4207	7.26779	7.26145	1.29887	-1.11181	-1.1167	< 0.001	0.0489	0.0412	0.00201741	0.199901	0.179113
SNOWBALL_018354_st	TNFAIP6	2.81239	2.43378	2.51954	2.66979	1.30009	1.06125	1.17773	0.0045	0.465	0.0561	0.0393262	0.722099	0.217972
SNOWBALL_022823_s_st	ETS1	7.77354	7.39462	7.2278	7.02121	1.30036	-1.12258	-1.29542	< 0.001	0.0202	< 0.001	0.000850065	0.111369	0.000959486
SNOWBALL_022103_st	S100A6	10.772	10.3929	10.1458	9.73195	1.30052	-1.18687	-1.58117	< 0.001	0.0012	< 0.001	0.000688155	0.0154837	3.90442e-06
SNOWBALL_005609_st	TBC1D31	6.43744	6.05653	5.97011	5.81342	1.30216	-1.06173	-1.18354	0.0003	0.3093	0.0093	0.00520466	0.589164	0.065672
SNOWBALL_002806_st	GLCE	6.42161	6.04012	6.01289	5.59769	1.30268	-1.01906	-1.35889	0.0007	0.7698	0.0002	0.0105214	0.90336	0.00380641
SNOWBALL_003320_st	MRPL50	4.81721	4.43502	4.65317	4.54492	1.30332	1.16324	1.07915	0.0011	0.0384	0.2726	0.0146249	0.171216	0.551408
SNOWBALL_017146_s_st	CEP55	5.95594	5.57336	5.12314	4.61816	1.30367	-1.36625	-1.93886	0.0063	0.0019	< 0.001	0.0497428	0.021472	6.20334e-05
SNOWBALL_033648_st	BLCAP	5.81605	5.43232	5.56354	5.41591	1.30471	1.09522	-1.01144	0.0013	0.2025	0.8701	0.0161889	0.468839	0.94904
SNOWBALL_044943_st	LOC100627949	4.42298	4.03777	3.91792	3.93843	1.30605	-1.08662	-1.07129	0.0037	0.3062	0.3939	0.0341564	0.586168	0.665575
SNOWBALL_036920_st	GTF3C2	7.18947	6.80326	6.72735	6.39302	1.30695	-1.05403	-1.32891	< 0.001	0.2606	< 0.001	0.000762456	0.53846	0.000455355
SNOWBALL_008924_st	PTGFR	8.41188	8.0239	7.78771	7.41997	1.30856	-1.17788	-1.51985	0.0003	0.0122	< 0.001	0.00510247	0.0789343	0.000133997
SNOWBALL_024684_st	DNA2	5.61901	5.23059	4.7619	4.61924	1.30896	-1.38385	-1.52769	0.0025	0.0005	< 0.001	0.0256889	0.00827806	0.00115598
SNOWBALL_017669_s_st	SPOPL	6.36821	5.97977	6.14405	6.10847	1.30898	1.12061	1.09331	0.0018	0.134	0.2341	0.0204852	0.370494	0.507944
SNOWBALL_012537_st	SLC25A13	7.05346	6.66488	6.60317	6.5101	1.30911	-1.0437	-1.11325	< 0.001	0.3397	0.0252	0.000525538	0.617838	0.129299
SNOWBALL_004491_x_st		6.54279	6.15317	5.92142	6.01599	1.31005	-1.17425	-1.09975	0.0003	0.0161	0.1307	0.00609651	0.0952944	0.365094
SNOWBALL_009803_st	LOC100154071	9.5161	9.12589	8.69699	8.54309	1.31058	-1.3462	-1.49776	0.0028	0.0014	< 0.001	0.028319	0.0166324	0.00202137
SNOWBALL_009788_x_st	LOC100511884	10.1076	9.71643	9.253	8.80558	1.31143	-1.37882	-1.88015	< 0.001	< 0.001	< 0.001	0.0016559	0.000402871	6.42806e-07
SNOWBALL_002068_st	EZR	8.20493	7.81325	7.49007	7.1657	1.31193	-1.25108	-1.5665	< 0.001	< 0.001	< 0.001	4.06958e-05	0.000242712	3.07409e-07
SNOWBALL_011872_st	PLK4	6.41999	6.02712	5.32031	4.84006	1.31301	-1.63218	-2.27687	0.0012	< 0.001	< 0.001	0.0151202	0.000163494	1.13032e-06
SNOWBALL_033178_st	MCMBP	6.6246	6.2313	6.423	6.36459	1.31339	1.14211	1.09679	0.0032	0.1112	0.2583	0.0310841	0.332119	0.535814
SNOWBALL_005969_st	TPM3	9.6596	9.26603	9.07176	8.85217	1.31365	-1.14415	-1.33224	< 0.001	0.0007	< 0.001	3.09885e-05	0.0104713	1.90569e-05
SNOWBALL_001775_st	CENPI	6.26254	5.86861	5.69863	5.14474	1.31396	-1.12504	-1.65161	0.004	0.1669	< 0.001	0.0363688	0.420304	0.00054799
SNOWBALL_019802_s_st	ST7	7.45045	7.05554	7.02249	6.9148	1.31486	-1.02317	-1.10247	0.0021	0.7633	0.2105	0.0228484	0.900279	0.478724
SNOWBALL_018614_st	NUP155	7.94965	7.55457	7.44305	7.3242	1.31501	-1.08037	-1.17314	< 0.001	0.0185	< 0.001	1.22938e-05	0.104938	0.00160474
SNOWBALL_030850_st	TANGO6	5.44665	5.05057	5.1296	5.05813	1.31592	1.05631	1.00525	0.0009	0.4313	0.9394	0.0126648	0.696031	0.977344
SNOWBALL_011885_st	LSM6	6.08455	5.68743	5.6651	5.65229	1.31688	-1.01559	-1.02465	0.0006	0.8151	0.7132	0.00959062	0.924724	0.875525
SNOWBALL_007046_st	PA2G4	9.72734	9.32989	9.26512	9.03749	1.31717	-1.04592	-1.22467	< 0.001	0.1362	< 0.001	8.69857e-06	0.374091	0.000161
SNOWBALL_029700_st	SLC38A1	5.94315	5.54546	5.63016	5.26645	1.3174	1.06047	-1.21337	0.0019	0.4401	0.019	0.0209522	0.70303	0.106902
SNOWBALL_027879_st	UBQLN1	6.75688	6.35848	6.39069	6.48851	1.31804	1.02258	1.09432	< 0.001	0.5976	0.045	0.000280013	0.810947	0.18959
SNOWBALL_026459_s_st	SRRT	7.81239	7.41393	7.11155	7.24874	1.3181	-1.23317	-1.12131	< 0.001	0.0011	0.0445	0.00201342	0.0137694	0.188092
SNOWBALL_016539_st	EWSR1	8.63871	8.23965	8.32844	8.28359	1.31865	1.06348	1.03093	< 0.001	0.0668	0.3449	2.00459e-05	0.243598	0.622676
SNOWBALL_015469_st	RASA2	6.82967	6.42887	6.39904	6.31	1.32024	-1.02089	-1.08588	0.0022	0.7902	0.2969	0.0237605	0.913095	0.577003
SNOWBALL_043112_st	BRF1	4.40362	4.00174	4.11655	4.22677	1.32123	1.08284	1.16881	0.0002	0.1949	0.0174	0.00443195	0.458937	0.100757
SNOWBALL_009561_st	LOC100155329	9.87908	9.47719	9.02666	8.5877	1.32123	-1.36654	-1.85252	< 0.001	< 0.001	< 0.001	1.65429e-06	5.27878e-07	6.42901e-10
SNOWBALL_001936_s_st	RBMX	8.48827	8.08592	8.04517	8.06113	1.32166	-1.02865	-1.01733	< 0.001	0.5631	0.7242	0.000883249	0.789581	0.881028
SNOWBALL_032540_st	KIF22	5.62821	5.22471	4.74281	4.31557	1.32271	-1.39658	-1.87793	0.0031	0.0007	< 0.001	0.0300772	0.0107149	6.28027e-05
SNOWBALL_008178_s_st	MMP2	10.596	10.192	10.0788	9.94225	1.32326	-1.08161	-1.18897	< 0.001	0.1463	0.0039	0.00152329	0.38989	0.0356907
SNOWBALL_019864_s_st	MET	7.06726	6.66293	6.36618	6.0679	1.32348	-1.22837	-1.51051	< 0.001	0.0003	< 0.001	0.000427451	0.0049795	1.16816e-05
SNOWBALL_001718_s_st	ARHGEF9	8.21006	7.80564	7.42226	6.44215	1.32355	-1.3044	-2.57308	< 0.001	0.0001	< 0.001	0.00187877	0.00282647	2.16568e-08
SNOWBALL_017111_s_st	GPAM	5.35006	4.94561	5.11581	5.03167	1.32358	1.12521	1.06147	0.0004	0.0811	0.3605	0.00711832	0.274228	0.636766
SNOWBALL_013823_st	PHF11	9.63021	9.22458	9.08483	8.74373	1.32466	-1.10172	-1.39557	< 0.001	0.0316	< 0.001	0.000222489	0.150359	4.61198e-05
SNOWBALL_005509_st	CLIP4	8.67709	8.27133	7.99456	7.76205	1.32479	-1.21148	-1.42334	< 0.001	0.0003	< 0.001	0.000225967	0.00500519	2.72279e-05
SNOWBALL_013367_st	TP53BP2	7.67426	7.26746	6.994	6.81758	1.32574	-1.2087	-1.36593	0.0001	0.004	< 0.001	0.00295046	0.0360043	0.00135593
SNOWBALL_006084_s_st	DNAH12,LOC110256253	9.83746	9.42988	9.21748	8.95749	1.32646	-1.15862	-1.38741	< 0.001	< 0.001	< 0.001	3.85372e-06	0.00149833	9.04356e-07
SNOWBALL_041893_st	ECE2	6.77987	6.37226	6.25675	6.02558	1.32649	-1.08336	-1.27163	0.0016	0.2972	0.0052	0.0183704	0.577262	0.0436252
SNOWBALL_039635_st	GSAP	5.75221	5.34424	5.03106	4.48983	1.32682	-1.24245	-1.80802	0.0006	0.0046	< 0.001	0.00874895	0.0400301	1.71107e-05
SNOWBALL_018060_s_st	SERPINE2	10.4769	10.0687	9.54824	9.12931	1.327	-1.43443	-1.91774	< 0.001	< 0.001	< 0.001	2.20506e-05	2.1017e-06	6.51879e-09
SNOWBALL_019519_st	RBL1	7.32585	6.91742	6.61653	6.65337	1.32724	-1.2319	-1.20085	0.0005	0.0053	0.012	0.00760043	0.0441122	0.078228
SNOWBALL_022948_s_st	MMP2	10.1597	9.75038	9.6531	9.56308	1.32804	-1.06975	-1.13863	< 0.001	0.1728	0.0143	0.000687595	0.428669	0.0880835
SNOWBALL_006933_st	RACGAP1	7.27892	6.86654	6.4425	5.76447	1.33088	-1.34168	-2.14662	0.0003	0.0002	< 0.001	0.00580837	0.00477991	8.81987e-07
SNOWBALL_023506_st	LOC106505804	7.67131	7.25879	7.27515	7.35927	1.33101	1.0114	1.07213	< 0.001	0.7339	0.0495	2.27278e-05	0.885907	0.201366
SNOWBALL_002023_s_st	PHF10	5.5173	5.10443	5.40357	5.26872	1.33133	1.23041	1.12061	0.0022	0.018	0.1671	0.0237062	0.103031	0.42063
SNOWBALL_041507_st	DUSP16	5.17767	4.76404	4.96302	4.63751	1.33203	1.14788	-1.09166	0.003	0.1128	0.3019	0.0297641	0.334964	0.582005
SNOWBALL_002774_st	LRRC49	5.18613	4.76908	4.26944	4.06634	1.3352	-1.41385	-1.62759	0.0014	0.0003	< 0.001	0.0167364	0.00519856	0.000342607
SNOWBALL_015052_st	CLUH	6.88323	6.46608	6.30126	6.38366	1.33529	-1.12102	-1.05879	< 0.001	0.0218	0.222	0.000381136	0.11719	0.493247
SNOWBALL_003144_st	CCBE1	8.25579	7.83819	7.96579	7.51747	1.33571	1.09248	-1.24895	0.0054	0.3406	0.0252	0.0449315	0.618743	0.129229
SNOWBALL_044231_st	EPN1	6.23044	5.81278	5.67769	5.6227	1.33575	-1.09817	-1.14083	0.0004	0.1702	0.0604	0.00695453	0.425091	0.228384
SNOWBALL_006193_st	LOC110256745	6.21749	5.79927	5.47405	5.32251	1.33628	-1.25285	-1.39161	< 0.001	0.0006	< 0.001	0.00150661	0.00935606	0.000507496
SNOWBALL_000622_st	CD44	7.43041	7.01172	6.77841	6.40077	1.33671	-1.17553	-1.52726	< 0.001	0.0027	< 0.001	0.000415038	0.0270899	1.22133e-05
SNOWBALL_002541_st	SH3BGRL2	5.71957	5.30059	4.99027	4.94973	1.33699	-1.23998	-1.27532	0.0004	0.0049	0.002	0.00728771	0.0417235	0.0217906
SNOWBALL_002158_st	MTFR2	6.48292	6.06351	5.47815	4.92861	1.33738	-1.50041	-2.19603	0.0038	0.0002	< 0.001	0.034687	0.00448126	1.40039e-05
SNOWBALL_008723_st	DSC2	6.77415	6.35469	5.31628	4.17202	1.33743	-2.05396	-4.53995	0.0003	< 0.001	< 0.001	0.00527012	1.64055e-06	1.02117e-09
SNOWBALL_004452_st	REXO5	6.90746	6.4873	6.16124	5.84794	1.33808	-1.25359	-1.55764	< 0.001	0.0009	< 0.001	0.00200965	0.0119884	5.18134e-05
SNOWBALL_035847_st	PLCB1	6.94033	6.51988	6.48081	6.37325	1.33835	-1.02745	-1.10698	0.0003	0.6779	0.1319	0.00584129	0.857026	0.367165
SNOWBALL_008936_st	CEP192	6.46801	6.04686	6.07046	5.81709	1.33899	1.01649	-1.17264	0.0005	0.8121	0.0318	0.00845315	0.923351	0.151061
SNOWBALL_006154_st	LOC102167385	6.94006	6.51841	6.205	6.22328	1.33946	-1.24264	-1.22699	< 0.001	0.0011	0.0018	0.00181933	0.0144217	0.0205533
SNOWBALL_021515_s_st	CSTF3	7.38739	6.96563	6.90857	6.87489	1.33956	-1.04035	-1.06492	0.0006	0.5742	0.3753	0.00944408	0.796539	0.649836
SNOWBALL_009862_s_st	ENPP4	5.19465	4.77226	4.40376	4.76351	1.34015	-1.29101	-1.00609	0.0019	0.0052	0.9397	0.0213025	0.0436722	0.977456
SNOWBALL_019353_st	CSE1L	8.41404	7.99069	7.90964	7.69342	1.34103	-1.05779	-1.22882	0.0002	0.3664	0.0036	0.00369047	0.642006	0.0335353
SNOWBALL_027213_st	EBF3	8.03219	7.60857	7.37502	7.60738	1.34129	-1.17573	-1.00083	0.0001	0.0125	0.9887	0.00254547	0.0804309	0.995792
SNOWBALL_011758_st	MAML3	4.94329	4.5191	4.14554	4.08918	1.34181	-1.29555	-1.34716	0.0014	0.0037	0.0013	0.0169482	0.0342325	0.0156503
SNOWBALL_001717_s_st	ARHGEF9	6.44907	6.02448	5.67799	4.96278	1.34219	-1.27146	-2.08739	0.0014	0.0062	< 0.001	0.016803	0.0492755	8.46361e-06
SNOWBALL_047337_st		2.24238	1.81554	1.54675	1.29755	1.34428	-1.20479	-1.43196	0.0006	0.0161	< 0.001	0.0090046	0.0956481	0.00225894
SNOWBALL_027569_st	PSME3	5.59784	5.17064	5.25292	5.27351	1.34462	1.05869	1.07391	< 0.001	0.174	0.0943	0.000109404	0.430324	0.300913
SNOWBALL_030432_st	DYRK2	4.69248	4.26519	4.5005	4.35793	1.34471	1.17716	1.0664	0.0007	0.0344	0.3756	0.0100472	0.159166	0.65008
SNOWBALL_003239_st	NUSAP1	7.34236	6.9148	6.26446	5.54444	1.34495	-1.56955	-2.58537	0.0008	< 0.001	< 0.001	0.0109032	0.000453611	3.74842e-07
SNOWBALL_042557_st	SRSF1	8.06953	7.64187	7.53672	7.45375	1.34505	-1.07561	-1.13928	< 0.001	0.2	0.0294	0.00155544	0.465586	0.14339
SNOWBALL_007259_st	SLC35E3	6.93116	6.50348	6.45885	6.19816	1.34507	-1.03141	-1.23569	< 0.001	0.5729	0.0012	0.00138807	0.795728	0.0149405
SNOWBALL_007417_st	ARNTL2	8.63464	8.20684	7.82991	7.5515	1.34518	-1.29858	-1.575	< 0.001	0.0002	< 0.001	0.00141039	0.00371167	3.14619e-05
SNOWBALL_027607_st	CNOT1	5.25454	4.82633	4.87704	5.01632	1.34556	1.03577	1.14075	0.0025	0.6777	0.1323	0.0260634	0.856922	0.367773
SNOWBALL_041971_st	ABHD13	4.16406	3.7354	3.84971	3.70106	1.34598	1.08246	-1.02409	0.0018	0.3336	0.7684	0.0202942	0.612273	0.902648
SNOWBALL_019112_st	GPCPD1	8.59651	8.16705	7.51835	7.29031	1.34672	-1.56776	-1.83622	0.0002	< 0.001	< 0.001	0.00441937	0.000146709	8.33914e-06
SNOWBALL_016007_s_st	FILIP1L	7.01293	6.58323	6.72114	6.53302	1.34696	1.10031	-1.03541	0.0014	0.233	0.6579	0.0167945	0.506618	0.845995
SNOWBALL_040465_st	SPRY4	6.21413	5.78374	5.51522	5.37562	1.34759	-1.20457	-1.32696	0.0016	0.0313	0.0025	0.0189453	0.149473	0.0255559
SNOWBALL_031584_st	KNL1	7.10786	6.67708	6.155	5.41034	1.34796	-1.43603	-2.40618	0.0052	0.0012	< 0.001	0.0436847	0.0153863	9.786e-06
SNOWBALL_023304_s_st	HMGA1	6.65627	6.22476	5.7174	5.49484	1.34864	-1.42144	-1.65854	0.0007	0.0002	< 0.001	0.0106664	0.00349303	0.000170951
SNOWBALL_006207_st	SLC25A24	8.0439	7.61229	7.40681	7.11124	1.34874	-1.15307	-1.41524	< 0.001	0.0006	< 0.001	1.66319e-05	0.0087634	3.95625e-06
SNOWBALL_012466_st	SLC36A4	7.11973	6.68734	6.56292	6.23874	1.34946	-1.09007	-1.36472	0.0014	0.2817	0.001	0.016562	0.561239	0.0132506
SNOWBALL_021803_st	PURB	6.83459	6.40132	6.44337	6.20782	1.35029	1.02957	-1.14354	0.0007	0.6899	0.0799	0.0102311	0.86341	0.271698
SNOWBALL_016195_s_st	FILIP1L	5.97154	5.5382	5.68083	5.50873	1.35036	1.10392	-1.02063	0.0001	0.1216	0.7399	0.00310997	0.349868	0.889047
SNOWBALL_025983_s_st	SAMM50	7.35401	6.92049	7.22326	7.12942	1.35052	1.2335	1.15583	0.0008	0.0109	0.0644	0.011314	0.0733119	0.238052
SNOWBALL_019470_s_st	MYBL2	7.48431	7.05062	6.13927	5.52882	1.35068	-1.8808	-2.87149	0.0016	< 0.001	< 0.001	0.0187107	5.41593e-05	3.7078e-07
SNOWBALL_001932_st		7.03124	6.59719	6.51558	6.37933	1.35102	-1.0582	-1.16301	0.0002	0.3734	0.0265	0.00361105	0.648277	0.133582
SNOWBALL_025303_s_st	BRCA1	6.11169	5.67694	5.14275	4.74552	1.35167	-1.44813	-1.90715	0.0008	0.0001	< 0.001	0.0108793	0.00256979	1.91236e-05
SNOWBALL_041945_st	NCAPD2	6.02583	5.5909	5.16767	4.8425	1.35185	-1.34093	-1.67993	0.004	0.0049	< 0.001	0.0363985	0.0416951	0.000956472
SNOWBALL_030732_st	ZGPAT	4.07016	3.63519	3.42658	3.44695	1.35188	-1.15558	-1.13937	0.0034	0.119	0.1566	0.0322537	0.345454	0.405514
SNOWBALL_033645_st	SLC31A1	6.89625	6.46104	6.30234	6.04773	1.35211	-1.11628	-1.33173	0.0012	0.1732	0.0019	0.0156077	0.429212	0.021078
SNOWBALL_001248_s_st	BAG6	7.08554	6.65017	6.39318	6.19914	1.35226	-1.19498	-1.36701	0.0029	0.0549	0.0022	0.0288139	0.214974	0.0237947
SNOWBALL_029045_st		2.7128	2.27727	2.14768	1.87959	1.35241	-1.09399	-1.31739	0.0059	0.3597	0.0106	0.0480379	0.636098	0.0716348
SNOWBALL_014524_st	MMD	6.57761	6.14179	5.71479	5.61497	1.35268	-1.34444	-1.44075	0.0005	0.0006	< 0.001	0.00771156	0.00883099	0.00194336
SNOWBALL_019030_st	SLC20A2	7.01628	6.57992	6.24037	6.1131	1.35319	-1.26536	-1.38206	0.0008	0.0057	0.0005	0.0117005	0.0466133	0.00755407
SNOWBALL_036968_st	TNRC6B	7.3263	6.88881	6.83896	6.67579	1.35424	-1.03516	-1.15912	0.0012	0.661	0.0743	0.0153474	0.847776	0.260205
SNOWBALL_002950_s_st	CNTLN	4.66471	4.22589	4.46499	3.98705	1.3555	1.18026	-1.18004	0.0006	0.0343	0.0344	0.00931955	0.158786	0.15932
SNOWBALL_013122_st	CENPF	7.35994	6.92106	6.43384	5.52576	1.35555	-1.40173	-2.63043	0.0023	0.001	< 0.001	0.0241438	0.0130974	1.52037e-06
SNOWBALL_030272_st	CDC7	5.01188	4.57273	4.50793	4.37138	1.3558	-1.04594	-1.14978	0.0029	0.6112	0.1267	0.0285771	0.819275	0.358451
SNOWBALL_042360_st		6.37738	5.93769	5.92026	5.577	1.35632	-1.01216	-1.28403	0.0021	0.8867	0.0085	0.0231399	0.955948	0.0618057
SNOWBALL_017832_st	HAT1	6.00945	5.56946	5.3825	5.11896	1.35659	-1.13836	-1.36652	< 0.001	0.0333	< 0.001	0.00146192	0.155756	0.00120411
SNOWBALL_006035_st	RGS20	6.30894	5.86849	5.68261	5.78585	1.35703	-1.13751	-1.05895	0.0001	0.0503	0.3606	0.00288982	0.203343	0.636858
SNOWBALL_033137_st		4.93164	4.49093	4.10345	4.19208	1.35727	-1.30811	-1.23016	0.0017	0.0044	0.0212	0.0194217	0.038832	0.114979
SNOWBALL_020172_s_st	DMD	7.50797	7.06704	6.70484	5.98947	1.35748	-1.28538	-2.11048	0.0011	0.0049	< 0.001	0.0142628	0.0420232	8.1202e-06
SNOWBALL_023900_s_st		6.28031	5.83931	5.33834	5.13775	1.35755	-1.41516	-1.62626	< 0.001	< 0.001	< 0.001	0.00125723	0.000430398	1.91536e-05
SNOWBALL_036183_st	LOC102161056	6.44587	6.00437	6.13516	5.89475	1.35802	1.0949	-1.07894	0.0003	0.1947	0.2734	0.00569938	0.458717	0.552318
SNOWBALL_001654_st	PHKA2	5.31772	4.87593	4.85677	4.86188	1.35829	-1.01337	-1.00978	0.0026	0.879	0.9111	0.0262682	0.95286	0.966062
SNOWBALL_035453_st	TNFAIP3	5.36571	4.9239	4.70157	4.29865	1.35831	-1.16661	-1.54248	0.0047	0.1177	0.0003	0.0404262	0.343372	0.00503859
SNOWBALL_015936_st	RFC4	6.97722	6.53493	6.28587	5.89806	1.35876	-1.18843	-1.55495	< 0.001	0.0042	< 0.001	0.000783222	0.0377655	2.87862e-05
SNOWBALL_047371_st	WBP11	7.44853	7.00582	6.75254	6.83635	1.35916	-1.19191	-1.12465	0.0002	0.0155	0.0887	0.00443384	0.0929618	0.289702
SNOWBALL_011656_s_st	LOC100738242	6.82352	6.3808	5.82525	5.24442	1.35916	-1.46973	-2.1983	0.0005	< 0.001	< 0.001	0.00804637	0.00152471	2.12245e-06
SNOWBALL_010547_st	DNAJA4	4.51448	4.07095	3.98171	3.9462	1.35993	-1.06381	-1.09032	0.0032	0.4954	0.344	0.0306795	0.743901	0.621782
SNOWBALL_005910_st	UAP1	7.21969	6.77386	6.87537	7.00169	1.3621	1.0729	1.17107	< 0.001	0.2396	0.0145	0.00173028	0.514606	0.0889073
SNOWBALL_006029_st	PRRX1	7.3725	6.92502	6.7091	6.29636	1.36366	-1.16145	-1.54613	0.0049	0.135	0.0003	0.0418367	0.372025	0.00556989
SNOWBALL_009335_s_st	FUBP1	8.65343	8.20558	7.90036	7.62456	1.364	-1.23561	-1.49591	< 0.001	0.0021	< 0.001	0.00170224	0.0227598	0.000185927
SNOWBALL_010918_st	G2E3	6.70898	6.26032	6.08782	5.74846	1.36477	-1.12701	-1.42589	0.0032	0.2008	0.0011	0.0305438	0.466651	0.0144666
SNOWBALL_000924_st	LRIG3	5.81759	5.3687	5.13331	5.23229	1.36499	-1.17722	-1.09917	0.0005	0.036	0.2032	0.0077718	0.163923	0.469682
SNOWBALL_046845_st	KIAA1524	6.19638	5.74721	5.27422	4.64645	1.36525	-1.38798	-2.14468	0.0033	0.0023	< 0.001	0.0317544	0.0240341	3.12119e-05
SNOWBALL_012948_st	DHX9	8.49046	8.03914	7.8074	7.54882	1.36728	-1.17426	-1.40476	< 0.001	0.0026	< 0.001	0.000193029	0.0263775	9.01169e-05
SNOWBALL_024899_s_st	LOC100152738	5.96606	5.51453	5.41753	5.40065	1.36749	-1.06955	-1.08214	0.0003	0.3326	0.258	0.00503704	0.61131	0.535499
SNOWBALL_022578_st	SLC31A1	9.11631	8.66345	8.3535	8.17776	1.36876	-1.23967	-1.40025	< 0.001	0.0003	< 0.001	0.000262908	0.00549838	0.000139225
SNOWBALL_017122_s_st	HERC4	8.64421	8.19023	8.06933	8.05052	1.36981	-1.08742	-1.10168	< 0.001	0.0721	0.0408	0.00013299	0.255156	0.177797
SNOWBALL_003218_st	GLIS3	8.64434	8.18925	7.7909	7.3942	1.37087	-1.318	-1.73513	< 0.001	< 0.001	< 0.001	0.000164883	0.000535414	7.76928e-07
SNOWBALL_042212_st	FUBP3	6.5372	6.08146	6.11824	6.14558	1.37149	1.02582	1.04545	0.0007	0.7403	0.5648	0.0103626	0.889258	0.790617
SNOWBALL_043948_st	WWOX	4.50305	4.04622	4.17375	4.17304	1.37252	1.09242	1.09189	< 0.001	0.1641	0.1663	0.00212261	0.4164	0.419508
SNOWBALL_024006_s_st	CASP10	4.89907	4.44219	4.4867	4.30484	1.37258	1.03133	-1.09988	0.001	0.6996	0.243	0.0129415	0.868646	0.51857
SNOWBALL_032337_st	RPS6KA3	5.76961	5.31239	5.46497	5.19093	1.3729	1.11156	-1.08783	0.0003	0.1386	0.2326	0.00488668	0.377964	0.506051
SNOWBALL_025162_st	HYKK	6.23706	5.77979	5.78715	5.67371	1.37294	1.00512	-1.0763	0.0021	0.9537	0.4084	0.0228967	0.982722	0.677598
SNOWBALL_020260_s_st	KIF4A	6.77288	6.31561	5.749	4.93736	1.37295	-1.48104	-2.59953	0.0038	0.0007	< 0.001	0.0347147	0.0100832	4.96424e-06
SNOWBALL_018787_st	CENPK	6.69112	6.23369	5.68338	5.10258	1.37309	-1.4644	-2.19028	0.0002	< 0.001	< 0.001	0.00465774	0.00112835	1.40603e-06
SNOWBALL_018842_st	PTTG1	7.19189	6.7335	6.06341	5.02309	1.374	-1.59117	-3.27255	0.0004	< 0.001	< 0.001	0.00723771	0.000371468	4.91287e-08
SNOWBALL_023956_s_st	SERPINE2	9.24855	8.7894	8.3084	7.89237	1.37473	-1.3957	-1.86222	< 0.001	< 0.001	< 0.001	0.00197178	0.00136976	4.52818e-06
SNOWBALL_017766_st	CASP3	8.67767	8.21825	8.06166	7.94204	1.37498	-1.11465	-1.21101	0.0001	0.1038	0.0078	0.00270155	0.3185	0.057727
SNOWBALL_032588_st	G3BP1	6.83711	6.37696	6.33016	6.1909	1.37568	-1.03297	-1.13765	< 0.001	0.5687	0.0343	0.00102851	0.793065	0.1589
SNOWBALL_007321_st	NCAPD2	5.96096	5.50082	5.01316	4.66315	1.37568	-1.40216	-1.78716	0.0015	0.001	< 0.001	0.0182206	0.0128664	0.000196092
SNOWBALL_030308_st	SLC20A2	8.41169	7.95143	7.63733	7.49072	1.37579	-1.24323	-1.37621	0.0001	0.0033	0.0001	0.00270739	0.0313862	0.00268864
SNOWBALL_023683_s_st	RBL1	7.6419	7.18156	6.81904	6.73694	1.37587	-1.28566	-1.36096	< 0.001	< 0.001	< 0.001	0.000119072	0.000970549	0.000163793
SNOWBALL_011825_st	GRID2	2.51476	2.05361	1.72489	1.80159	1.37663	-1.2559	-1.19088	0.0061	0.039	0.104	0.0491083	0.172836	0.319024
SNOWBALL_011537_st	PAICS	6.92152	6.45984	6.33563	5.95528	1.37714	-1.08991	-1.41869	0.0019	0.3342	0.0009	0.0214779	0.612734	0.0127001
SNOWBALL_032389_st	NSD1	4.02317	3.56128	3.52861	3.56338	1.37735	-1.0229	1.00146	0.0013	0.786	0.9861	0.0157674	0.911179	0.99475
SNOWBALL_025373_s_st	ACCSL,ALKBH3	6.07327	5.61105	5.59911	5.43175	1.37766	-1.00832	-1.13234	0.0013	0.9215	0.1525	0.0165362	0.970512	0.399425
SNOWBALL_019232_st	TPX2	7.87823	7.41598	6.8079	6.20575	1.37769	-1.52423	-2.31375	0.0022	0.0002	< 0.001	0.0239268	0.0041543	9.80686e-06
SNOWBALL_036991_st	CNR1	5.43309	4.97015	4.72786	4.59567	1.37835	-1.18287	-1.29638	0.0007	0.0445	0.0039	0.0105739	0.188187	0.0356411
SNOWBALL_019270_s_st	TPX2	8.32094	7.85682	7.38173	6.70103	1.37948	-1.39	-2.22806	0.0026	0.0022	< 0.001	0.0265418	0.0233657	1.93397e-05
SNOWBALL_005715_st	POP1	6.39033	5.92613	5.833	5.75382	1.37955	-1.06668	-1.12686	< 0.001	0.3049	0.0675	0.00194535	0.584897	0.245071
SNOWBALL_020833_st	ACSL4	8.8933	8.42902	8.09989	8.01433	1.37962	-1.25626	-1.33301	< 0.001	< 0.001	< 0.001	7.20208e-05	0.00146312	0.000203084
SNOWBALL_010191_st	FANCI	5.38487	4.92049	4.46701	4.19192	1.37972	-1.36934	-1.657	0.0007	0.0009	< 0.001	0.0105753	0.0122648	0.000332213
SNOWBALL_013894_st	CAB39L	8.55453	8.09013	7.81889	7.52477	1.37974	-1.20684	-1.47976	< 0.001	0.006	< 0.001	0.00159293	0.0482481	0.00030413
SNOWBALL_030366_st	DUSP16	5.582	5.11714	5.31335	5.18144	1.38018	1.14568	1.04557	0.0013	0.1205	0.5984	0.0162162	0.348137	0.811404
SNOWBALL_035827_st		3.88532	3.41966	3.55209	3.53172	1.38095	1.09614	1.08077	0.003	0.3362	0.4138	0.0298061	0.614504	0.681943
SNOWBALL_040843_st	GLIS3	6.22795	5.76125	5.65608	5.37269	1.38194	-1.07562	-1.30909	0.0017	0.409	0.0064	0.0195729	0.678049	0.0506568
SNOWBALL_023114_s_st	PITPNC1	6.87372	6.40689	6.01247	5.88132	1.38207	-1.31441	-1.4395	0.0014	0.0049	0.0005	0.0169687	0.0421784	0.00808131
SNOWBALL_010025_s_st	HMGA1	6.08291	5.6147	5.12101	5.08878	1.38339	-1.40804	-1.43985	0.0025	0.0017	0.001	0.0261332	0.0194336	0.0133313
SNOWBALL_019849_st	CAV2	7.23149	6.76112	6.62659	6.26138	1.38547	-1.09773	-1.41395	0.0001	0.1632	< 0.001	0.00251086	0.415094	0.00157238
SNOWBALL_025403_st	SGK1	7.80463	7.33309	5.92891	5.78812	1.38659	-2.64667	-2.91796	0.0054	< 0.001	< 0.001	0.0449006	9.1654e-06	3.67739e-06
SNOWBALL_023171_st	PPP1CC	9.06459	8.59269	8.50433	8.52207	1.38694	-1.06316	-1.05016	< 0.001	0.2858	0.3905	0.00080174	0.56548	0.662676
SNOWBALL_000313_s_st	CDC45	5.44454	4.97252	4.62282	4.21043	1.38705	-1.2743	-1.69594	0.0046	0.0268	< 0.001	0.040164	0.134763	0.00186533
SNOWBALL_029527_st	NR4A2	2.52447	2.0509	1.6395	1.58288	1.38854	-1.32997	-1.38321	0.0001	0.0005	0.0001	0.00296375	0.00805132	0.00323586
SNOWBALL_021492_st	HIVEP2	4.91355	4.43923	4.47891	4.35137	1.38926	1.02789	-1.06279	0.0032	0.776	0.5308	0.0310926	0.906219	0.768448
SNOWBALL_013863_st	CKAP2	8.11294	7.63792	7.10573	6.31169	1.38994	-1.44612	-2.50746	0.0013	0.0005	< 0.001	0.0164328	0.00805036	2.81084e-06
SNOWBALL_043869_st	TIA1	6.70179	6.22557	6.36967	6.28798	1.39109	1.10504	1.04421	0.0018	0.2758	0.6317	0.0205838	0.554979	0.831235
SNOWBALL_027308_st	CKAP2L	4.72197	4.24564	4.02206	3.42518	1.3912	-1.16762	-1.76597	0.001	0.0767	< 0.001	0.0129509	0.265058	0.000193121
SNOWBALL_015460_st	SMC4	8.21574	7.73873	7.37009	6.79224	1.39186	-1.29113	-1.92717	0.0003	0.0025	< 0.001	0.00522743	0.0260551	1.38201e-05
SNOWBALL_032496_st	MUM1L1	4.67539	4.1983	4.06157	3.70156	1.39193	-1.09941	-1.41101	0.0031	0.3345	0.0023	0.0304283	0.613004	0.0244899
SNOWBALL_028028_st		6.5786	6.1002	5.95598	5.67236	1.3932	-1.10513	-1.34521	0.0025	0.2969	0.0056	0.0259679	0.576968	0.0459675
SNOWBALL_007622_st	RPL3	7.97652	7.49757	7.2294	7.18412	1.39372	-1.20428	-1.24268	0.0018	0.0529	0.0266	0.0204711	0.210106	0.133836
SNOWBALL_044407_st	RASA2	4.70751	4.22804	4.19735	3.84008	1.39423	-1.0215	-1.30854	0.0016	0.8119	0.0075	0.0190665	0.923248	0.0564382
SNOWBALL_024548_st	TSNAX	6.266	5.78611	6.04466	5.31709	1.39464	1.19627	-1.38417	0.0028	0.0759	0.0033	0.0281966	0.263496	0.0318837
SNOWBALL_009207_s_st	STIL	5.20492	4.72435	4.38975	3.88987	1.3953	-1.26103	-1.78321	0.0016	0.0179	< 0.001	0.0187627	0.102611	0.000312313
SNOWBALL_022526_s_st	PROCR	4.88241	4.40173	4.04668	3.53061	1.3954	-1.27903	-1.82909	0.0018	0.0139	< 0.001	0.0202825	0.0863676	0.00024126
SNOWBALL_000578_s_st	ATP5E	5.82708	5.34635	5.09578	4.98366	1.39545	-1.18968	-1.28583	0.003	0.0878	0.0181	0.0297144	0.287931	0.103494
SNOWBALL_022853_st	LOC396566	7.4201	6.93813	6.5644	6.18338	1.39665	-1.29571	-1.68735	< 0.001	0.0007	< 0.001	0.00175193	0.0107831	3.32342e-05
SNOWBALL_023665_s_st	MYBL2	7.96498	7.48272	6.67073	6.18818	1.39693	-1.75564	-2.45299	0.0006	< 0.001	< 0.001	0.00920898	0.000144964	1.65741e-06
SNOWBALL_044795_st	NCOA1	2.27611	1.79371	1.98977	2.19128	1.39706	1.14557	1.31728	0.0011	0.1266	0.0048	0.0143368	0.358325	0.0415374
SNOWBALL_009058_st	PLPP3	6.49606	6.01279	6.12445	6.37017	1.3979	1.08047	1.28109	0.0014	0.3846	0.0113	0.0166304	0.657701	0.0751208
SNOWBALL_046309_st	ZEB1,LOC110255584	5.58088	5.09756	5.2784	5.0782	1.39796	1.13355	-1.01351	0.002	0.1867	0.8844	0.0219197	0.447882	0.954961
SNOWBALL_007414_st	NUP107	7.19267	6.70843	6.45041	6.32663	1.39885	-1.19584	-1.30297	< 0.001	0.0005	< 0.001	4.23265e-05	0.00790262	0.0003742
SNOWBALL_009644_st	LOC100158121	8.56208	8.07741	7.36123	6.82278	1.39926	-1.64282	-2.38606	0.0031	< 0.001	< 0.001	0.0301878	0.00240844	1.66903e-05
SNOWBALL_002476_st	HAUS1	5.4923	5.00713	4.6719	4.37457	1.39975	-1.26157	-1.55032	< 0.001	0.002	< 0.001	0.0018277	0.022185	0.000193507
SNOWBALL_040367_st	LOC110255270,LOC100737946	3.62447	3.13928	3.08256	2.84509	1.39977	-1.0401	-1.2262	0.0033	0.6925	0.0531	0.0317739	0.864888	0.210392
SNOWBALL_024729_st	FAM213A	9.27938	8.79336	8.20403	7.79393	1.40058	-1.50454	-1.99921	0.0005	< 0.001	< 0.001	0.0081408	0.00202214	1.85029e-05
SNOWBALL_016528_s_st	RFC5	7.78175	7.29466	6.78887	6.57099	1.40162	-1.4199	-1.65137	0.0008	0.0006	< 0.001	0.0118095	0.00928708	0.000617076
SNOWBALL_003473_st	SMC2	8.131	7.64376	7.01515	6.46161	1.40176	-1.54607	-2.26914	0.0013	0.0001	< 0.001	0.0164892	0.00296817	1.09991e-05
SNOWBALL_034780_st	ATP1B3	3.29688	2.80929	2.74296	2.85211	1.4021	-1.04705	1.03013	0.0057	0.6703	0.7831	0.046683	0.852929	0.909699
SNOWBALL_025500_st	CLCN3	3.76783	3.27964	3.50995	3.46075	1.40268	1.17308	1.13375	0.0039	0.1317	0.2296	0.0357588	0.366797	0.502423
SNOWBALL_046767_st	TACC2	5.03844	4.54846	4.38022	4.13346	1.40442	-1.12369	-1.33329	< 0.001	0.0919	0.0004	0.00212883	0.296191	0.00713553
SNOWBALL_035756_st	LOC100525309	6.55711	6.06694	6.27069	6.18006	1.4046	1.15168	1.08156	0.0042	0.1849	0.453	0.0376469	0.445565	0.712912
SNOWBALL_025769_st	MCM6	7.95637	7.46512	7.19174	7.07287	1.40567	-1.20863	-1.31244	< 0.001	0.0002	< 0.001	2.04697e-05	0.00340353	0.000169809
SNOWBALL_035584_st	CENPE	5.94552	5.45419	4.8303	4.29721	1.40574	-1.54103	-2.2299	0.0051	0.0008	< 0.001	0.0429774	0.0113242	8.02404e-05
SNOWBALL_001242_s_st	BAG6	7.9828	7.49034	7.32499	7.06339	1.40684	-1.12143	-1.34439	0.0012	0.2037	0.0035	0.0147258	0.470358	0.0328851
SNOWBALL_037501_st	RRM2	7.12978	6.6373	6.15146	5.42392	1.40686	-1.4004	-2.31881	0.0013	0.0015	< 0.001	0.0163718	0.0177286	9.30691e-06
SNOWBALL_017704_st	TUBGCP5	4.92454	4.43152	4.46739	4.52092	1.40739	1.02517	1.06393	0.0019	0.7908	0.5108	0.0212322	0.91335	0.754705
SNOWBALL_002010_s_st	DKC1	7.23471	6.74011	6.82638	6.71717	1.40893	1.06162	-1.01603	< 0.001	0.264	0.7622	0.000289099	0.542098	0.899801
SNOWBALL_037418_st	MAGI3	6.78689	6.29227	6.19316	6.14193	1.40895	-1.07111	-1.10983	< 0.001	0.2787	0.1083	0.00123518	0.558113	0.326914
SNOWBALL_016359_st	DPYSL2	8.27024	7.7744	7.48487	6.92728	1.41015	-1.22224	-1.7989	< 0.001	0.0064	< 0.001	0.00170943	0.0503139	1.38201e-05
SNOWBALL_015612_st	EOGT	8.00963	7.51374	7.44817	7.35808	1.41019	-1.0465	-1.11393	< 0.001	0.2908	0.0196	3.82259e-05	0.570726	0.109099
SNOWBALL_013971_st	TFDP1	5.86676	5.36957	5.25327	5.20662	1.41145	-1.08396	-1.11958	0.006	0.47	0.3152	0.0484221	0.725699	0.594918
SNOWBALL_019342_s_st	TGM2	7.72635	7.22896	6.9858	6.53613	1.41165	-1.18359	-1.61646	0.0049	0.1302	0.0003	0.041794	0.36427	0.00590133
SNOWBALL_035706_st		4.34234	3.84446	3.92835	3.95893	1.41214	1.05987	1.08258	0.0012	0.517	0.3793	0.0150683	0.758978	0.653268
SNOWBALL_020743_s_st	ACSL4	9.5688	9.06826	8.69234	8.41737	1.41475	-1.29766	-1.57014	< 0.001	< 0.001	< 0.001	4.5336e-05	0.000603622	3.59814e-06
SNOWBALL_042957_st	FNDC3A	4.29527	3.79375	3.78132	3.4409	1.4157	-1.00866	-1.27708	0.0003	0.9101	0.005	0.00521231	0.965638	0.0422758
SNOWBALL_001776_s_st	CENPI	6.16415	5.66234	5.4139	4.98893	1.41599	-1.18792	-1.59483	0.0028	0.1002	0.0002	0.0281479	0.312148	0.00447635
SNOWBALL_002675_st	PCLAF	8.33066	7.82556	7.02121	6.47468	1.41922	-1.74635	-2.55068	0.0052	< 0.001	< 0.001	0.0439701	0.00239622	2.51133e-05
SNOWBALL_023678_s_st	TGM2	6.31987	5.81217	5.68611	5.36589	1.42178	-1.09131	-1.36252	0.0045	0.4238	0.0103	0.0392083	0.689966	0.0703861
SNOWBALL_004142_st	MELK	5.72896	5.22091	4.69764	4.36588	1.42213	-1.43721	-1.8088	0.0005	0.0004	< 0.001	0.00856928	0.00703868	0.000131431
SNOWBALL_047124_st	MCC	4.10741	3.59889	3.35866	3.39747	1.42259	-1.18119	-1.14983	0.001	0.0757	0.1309	0.0131844	0.263105	0.365443
SNOWBALL_032199_st	NUP205	7.23083	6.72216	6.74629	6.59722	1.42273	1.01687	-1.09047	< 0.001	0.7829	0.1662	0.000793067	0.909598	0.419286
SNOWBALL_014660_st	NR1D1	5.6706	5.16145	5.0448	4.75028	1.42321	-1.08421	-1.32977	0.0003	0.3012	0.0017	0.00493737	0.581268	0.0194517
SNOWBALL_017274_s_st	RTKN2	5.07924	4.5695	4.21204	3.61412	1.42379	-1.28118	-1.9391	0.0062	0.0423	< 0.001	0.0496279	0.181987	0.00080306
SNOWBALL_034192_st	TCP11	5.25911	4.74913	5.0193	4.92369	1.42403	1.20595	1.12862	0.0007	0.0412	0.1707	0.0101756	0.178966	0.425717
SNOWBALL_013038_st	DHX9	9.031	8.51904	8.22934	7.92402	1.42599	-1.22239	-1.51049	< 0.001	0.0036	< 0.001	0.000678598	0.0338569	0.000182024
SNOWBALL_031785_st	ASPM	6.7913	6.27724	5.71066	4.81809	1.42806	-1.48101	-2.74946	0.0003	0.0001	< 0.001	0.00554145	0.00272542	4.56938e-07
SNOWBALL_042861_st	CNR1	5.2841	4.76955	4.44168	4.25573	1.42855	-1.25515	-1.42783	0.0005	0.0138	0.0005	0.00810349	0.0860344	0.00817717
SNOWBALL_002496_st	STARD6	3.90782	3.39211	3.28319	3.28328	1.4297	-1.07842	-1.07835	0.0006	0.3836	0.384	0.00940434	0.656816	0.657106
SNOWBALL_033461_st	NXN	4.67115	4.15406	3.99918	4.12405	1.43106	-1.11333	-1.02102	0.0046	0.3384	0.8508	0.0398776	0.616648	0.940697
SNOWBALL_016422_st	PPTC7	7.86018	7.34172	6.77867	6.59816	1.43243	-1.47739	-1.6743	0.0002	< 0.001	< 0.001	0.00441132	0.00238713	0.000235128
SNOWBALL_033743_st	CLDN12	4.1038	3.58239	3.76122	3.28522	1.43535	1.13196	-1.22874	0.0013	0.1999	0.041	0.0158893	0.46538	0.178578
SNOWBALL_041352_st	TRAF3	5.27915	4.7567	5.07164	5.14414	1.4364	1.24396	1.30807	0.0036	0.057	0.0226	0.033859	0.220192	0.119973
SNOWBALL_028037_st	PRTFDC1	7.74003	7.21723	6.50638	5.9112	1.43673	-1.63678	-2.4726	< 0.001	< 0.001	< 0.001	0.000743006	4.67153e-05	1.23598e-07
SNOWBALL_017397_st	ENTPD7	7.3667	6.84272	6.49012	6.50913	1.43791	-1.27686	-1.26015	0.0001	0.0036	0.0053	0.00270488	0.033738	0.0444802
SNOWBALL_012829_st	SEMA3A	6.07665	5.55258	5.13479	5.04239	1.43801	-1.33588	-1.42424	0.0003	0.002	0.0004	0.00526765	0.0220581	0.00635728
SNOWBALL_024605_s_st	KIF20B	6.14765	5.62325	4.91363	4.43126	1.43834	-1.63537	-2.28468	0.0008	< 0.001	< 0.001	0.0110375	0.00123156	1.0946e-05
SNOWBALL_009818_s_st	IER3	8.76265	8.23637	8.16828	8.06574	1.44021	-1.04833	-1.12555	0.0001	0.5209	0.1195	0.00265772	0.761686	0.34642
SNOWBALL_034233_st	LOC102161888	4.61564	4.08917	4.2702	4.23439	1.4404	1.13369	1.10589	0.0025	0.236	0.338	0.0258042	0.510188	0.61625
SNOWBALL_022866_st	CASP10	6.65481	6.12801	6.2835	5.8607	1.44073	1.1138	-1.20356	< 0.001	0.1394	0.0166	0.0019836	0.379164	0.0976511
SNOWBALL_007646_st	PARPBP	8.00303	7.47623	6.64598	6.07966	1.44073	-1.77799	-2.63276	0.004	< 0.001	< 0.001	0.0364126	0.00193236	1.88914e-05
SNOWBALL_012692_st	CFAP69	5.56623	5.0384	4.88443	4.33668	1.44176	-1.11263	-1.62644	< 0.001	0.0614	< 0.001	0.000205708	0.230877	1.39747e-05
SNOWBALL_002838_s_st	ZNF516	6.31721	5.7892	5.29984	5.17048	1.44193	-1.40383	-1.53552	0.0046	0.0077	0.0014	0.0403842	0.0574604	0.0170742
SNOWBALL_038031_st	CD44	6.02434	5.49595	5.11392	5.00369	1.44232	-1.30318	-1.40664	< 0.001	0.0003	< 0.001	0.00045919	0.00584692	0.000839451
SNOWBALL_002297_st	LOC102160401	6.23483	5.7043	5.1873	4.95937	1.44446	-1.43098	-1.6759	0.0006	0.0008	< 0.001	0.00919973	0.0108671	0.000717416
SNOWBALL_023227_s_st	DKC1	7.1591	6.62749	6.56245	6.55504	1.44554	-1.04611	-1.05151	0.0018	0.6529	0.6166	0.0200726	0.84333	0.822643
SNOWBALL_013393_st	PRTFDC1	9.17407	8.64045	7.89535	7.3811	1.44756	-1.67608	-2.39387	< 0.001	< 0.001	< 0.001	6.33163e-05	2.54086e-06	1.5425e-08
SNOWBALL_043306_st	SFRP1	5.96504	5.43133	5.41494	4.9277	1.44765	-1.01142	-1.41778	0.0005	0.8964	0.0009	0.00847263	0.960007	0.0122727
SNOWBALL_020731_s_st	ACSL4	10.2572	9.72294	9.31055	9.01817	1.4482	-1.33089	-1.62989	< 0.001	< 0.001	< 0.001	2.14704e-05	0.00024177	1.46935e-06
SNOWBALL_021635_st	ETS2	5.76427	5.22811	5.08046	5.00721	1.45011	-1.10776	-1.16546	< 0.001	0.0737	0.0113	0.000191443	0.258698	0.0748225
SNOWBALL_006295_st	EVI5	8.10445	7.56629	7.30018	7.107	1.45213	-1.20256	-1.37486	< 0.001	< 0.001	< 0.001	2.15403e-07	0.00019303	1.03312e-06
SNOWBALL_003156_st	MYEF2	6.93088	6.39141	6.12907	5.77511	1.45343	-1.19942	-1.53294	< 0.001	0.0149	< 0.001	0.00120883	0.0905401	0.000393022
SNOWBALL_013397_s_st	CTSL	7.63771	7.09786	7.106	6.89306	1.45383	1.00566	-1.15253	0.0002	0.944	0.0919	0.00449001	0.979075	0.296198
SNOWBALL_003236_st	FGF7	9.87614	9.33566	8.88639	9.00564	1.45446	-1.36535	-1.25703	< 0.001	0.0001	0.0021	0.000681072	0.00297412	0.0225149
SNOWBALL_006418_st	LOC110255273	8.76048	8.21814	7.73713	7.30576	1.45633	-1.39572	-1.88214	< 0.001	0.0002	< 0.001	0.00180736	0.00446279	1.73164e-05
SNOWBALL_003182_st	DLGAP5	7.52885	6.98643	6.26604	5.25297	1.45642	-1.64762	-3.32524	0.0001	< 0.001	< 0.001	0.00280817	0.000270799	5.76418e-08
SNOWBALL_028667_st		6.24724	5.70381	5.89277	5.76555	1.45743	1.13994	1.04372	0.0002	0.1207	0.5997	0.00457754	0.348526	0.812272
SNOWBALL_026950_st	RPAIN	5.14367	4.59988	4.36211	4.16991	1.4578	-1.17917	-1.34721	0.0013	0.1084	0.0073	0.0161399	0.327102	0.0550998
SNOWBALL_035672_st	SMC1A	5.44044	4.89221	4.46593	4.10856	1.46229	-1.34377	-1.72148	0.0063	0.0264	0.0004	0.0498043	0.133479	0.00639396
SNOWBALL_024502_s_st	CDK1	2.34597	1.79757	1.57048	1.44547	1.46246	-1.17047	-1.27641	0.0009	0.1114	0.0189	0.0122479	0.332471	0.106295
SNOWBALL_001019_st	PDE4B	7.86304	7.31175	6.38059	5.86981	1.4654	-1.90681	-2.71687	0.0024	< 0.001	< 0.001	0.0251611	0.000619585	1.08683e-05
SNOWBALL_009716_st	LOC100157763	9.85065	9.29908	8.75835	8.29689	1.46568	-1.45471	-2.00303	0.0005	0.0006	< 0.001	0.00810693	0.0092404	5.99827e-05
SNOWBALL_026490_st	SOAT1	6.75831	6.20611	6.05075	6.03723	1.46633	-1.11369	-1.12418	< 0.001	0.1255	0.098	0.000993763	0.356561	0.307951
SNOWBALL_018007_st	GULP1	6.06013	5.50632	5.37092	4.89841	1.46795	-1.0984	-1.52406	0.0009	0.3355	0.0004	0.0123914	0.613932	0.00676559
SNOWBALL_014438_s_st	TOP2A	8.20849	7.65457	7.00835	6.10013	1.46807	-1.56506	-2.93719	0.0014	0.0004	< 0.001	0.0167081	0.00624217	2.73658e-06
SNOWBALL_014620_st	SRSF1	9.87519	9.31826	9.18406	9.06496	1.47114	-1.09749	-1.19193	< 0.001	0.083	0.003	7.72651e-05	0.278249	0.0296672
SNOWBALL_016380_st	ESCO2	6.12452	5.5639	5.27656	4.94391	1.4749	-1.22039	-1.53686	0.0003	0.0297	< 0.001	0.00499463	0.144368	0.00237336
SNOWBALL_008823_st		4.14339	3.58247	3.67097	3.81924	1.47521	1.06326	1.17835	0.0021	0.5721	0.1423	0.0230347	0.795252	0.383832
SNOWBALL_034612_st	EPS8	4.73808	4.17653	3.77622	3.39529	1.47584	-1.3198	-1.71861	0.0028	0.0232	0.0002	0.0282749	0.122211	0.0034529
SNOWBALL_013303_st	EXO1	6.01407	5.45234	4.87836	4.48578	1.47604	-1.48863	-1.95418	0.0024	0.002	< 0.001	0.0251377	0.022279	0.000529517
SNOWBALL_009192_st	CDC20	8.4652	7.90315	7.37111	6.58022	1.47637	-1.44597	-2.50174	0.0005	0.0008	< 0.001	0.00795808	0.0113555	4.81611e-06
SNOWBALL_034803_st		3.89786	3.33433	2.79097	2.93121	1.47789	-1.45736	-1.32236	0.0007	0.001	0.0087	0.0103357	0.0129745	0.0623703
SNOWBALL_011381_st	NIPAL1	6.87111	6.30583	6.22299	5.9601	1.47967	-1.0591	-1.27079	< 0.001	0.4588	0.006	0.00226538	0.717371	0.0481199
SNOWBALL_043183_st	MKI67	4.25647	3.69055	3.28001	3.01879	1.48034	-1.32918	-1.59301	0.0027	0.0205	0.0007	0.0272323	0.112333	0.00989806
SNOWBALL_017179_st	KIF20B	6.13411	5.56632	4.94282	4.3464	1.48225	-1.54061	-2.32934	0.0002	< 0.001	< 0.001	0.00350965	0.00172254	3.782e-06
SNOWBALL_003163_s_st	LOC100514264	9.59396	9.02599	7.78803	5.98015	1.48243	-2.35866	-8.2583	< 0.001	< 0.001	< 0.001	0.000223462	1.21352e-07	1.12508e-11
SNOWBALL_004441_st	FUS	8.89607	8.32656	8.13957	8.20579	1.48402	-1.13838	-1.08731	< 0.001	0.0592	0.2081	0.000533261	0.22553	0.475765
SNOWBALL_029015_st	F2RL2	2.74734	2.17697	2.00872	2.17752	1.4849	-1.12369	1.00038	0.0007	0.2383	0.9969	0.0107843	0.513031	0.998867
SNOWBALL_007728_st	GAS2L3	6.71963	6.149	5.79162	4.85334	1.48518	-1.28109	-2.45489	0.0002	0.0085	< 0.001	0.00407155	0.0615315	2.68176e-06
SNOWBALL_018835_st	HMMR	6.17585	5.60216	5.11461	4.59004	1.48832	-1.40207	-2.01687	0.0001	0.0006	< 0.001	0.00277941	0.00879587	1.88702e-05
SNOWBALL_029516_st	ABL2	5.14584	4.56899	4.41849	4.61657	1.49159	-1.10995	1.03353	0.0052	0.4111	0.793	0.043589	0.679732	0.914508
SNOWBALL_005993_st	MCM4	7.6276	7.05022	6.71271	6.30135	1.49213	-1.26357	-1.68048	< 0.001	0.0008	< 0.001	0.000166231	0.011229	1.41533e-05
SNOWBALL_014505_s_st	SPAG5	5.54264	4.96485	4.48581	3.8669	1.49257	-1.39382	-2.1405	0.004	0.0134	< 0.001	0.036466	0.0840728	0.000412373
SNOWBALL_041842_st	MBNL1	4.69116	4.1128	4.11136	3.86834	1.49315	-1.001	-1.18465	0.0003	0.9909	0.0668	0.00502089	0.99663	0.243558
SNOWBALL_020633_st	TMEM164	4.74873	4.17016	4.1057	4.30228	1.49337	-1.04569	1.0959	0.001	0.6602	0.3722	0.0131747	0.847334	0.647092
SNOWBALL_028352_st	SHTN1	2.42317	1.84347	1.9214	1.95079	1.49453	1.0555	1.07722	0.005	0.6682	0.556	0.0427234	0.851716	0.784797
SNOWBALL_003519_st	LOC100155741	7.19107	6.61044	5.54523	4.54789	1.4955	-2.09247	-4.17722	0.0004	< 0.001	< 0.001	0.00651991	3.99161e-05	6.41017e-08
SNOWBALL_000558_st	GNAS	4.0055	3.42333	3.81516	3.74196	1.4971	1.31206	1.24715	0.0007	0.0123	0.0356	0.010152	0.07936	0.162893
SNOWBALL_008032_st	SHCBP1	8.10182	7.51874	6.55584	5.66842	1.49805	-1.94922	-3.6058	0.0009	< 0.001	< 0.001	0.0121063	0.000255441	4.82788e-07
SNOWBALL_005735_st	C4H8orf34	4.27709	3.69387	3.94399	3.76269	1.49818	1.18931	1.04885	0.0038	0.1669	0.6956	0.0352802	0.420376	0.866541
SNOWBALL_021835_st	RHNO1	4.93717	4.3507	4.1859	3.65344	1.50156	-1.12101	-1.62143	0.0004	0.2295	< 0.001	0.00688908	0.502351	0.00193723
SNOWBALL_029697_st	GAS1	4.76054	4.17268	4.09374	4.11117	1.50302	-1.05624	-1.04355	< 0.001	0.4461	0.5513	0.000897537	0.707697	0.781906
SNOWBALL_002483_st	MMS22L	4.84075	4.25118	3.90255	3.43883	1.5048	-1.27335	-1.75607	0.0009	0.0285	< 0.001	0.0122307	0.140487	0.00121334
SNOWBALL_030201_st	G3BP1	5.29372	4.7032	4.79812	4.58409	1.50579	1.06801	-1.08607	0.0004	0.4858	0.3839	0.00696202	0.737144	0.657026
SNOWBALL_020202_st	CCNB3	6.42839	5.83685	4.92664	4.01417	1.50686	-1.87931	-3.53738	0.0028	< 0.001	< 0.001	0.0278868	0.00156694	2.67876e-06
SNOWBALL_042000_st	CENPE	7.09744	6.50541	5.95018	5.18885	1.50736	-1.46941	-2.49072	0.0017	0.0028	< 0.001	0.0195521	0.0279325	3.38421e-05
SNOWBALL_045175_st	NXN	7.00146	6.409	6.42383	6.40253	1.50782	1.01033	-1.00449	0.0009	0.9197	0.9649	0.0118581	0.969759	0.986775
SNOWBALL_034174_st	NFIB	5.55882	4.966	4.89142	4.77275	1.5082	-1.05305	-1.14333	< 0.001	0.4926	0.0876	0.00125847	0.742101	0.287542
SNOWBALL_014598_st	LOC100625662	5.68765	5.09335	4.92831	4.86779	1.50974	-1.1212	-1.16923	0.0013	0.2978	0.1608	0.0164672	0.577947	0.411564
SNOWBALL_045517_st	RGS20	4.84242	4.24746	3.85346	3.95243	1.51043	-1.31403	-1.22691	0.0007	0.0136	0.0543	0.0102277	0.0850058	0.21349
SNOWBALL_021829_s_st		7.15322	6.55666	6.49579	6.25758	1.51211	-1.0431	-1.23036	< 0.001	0.5656	0.0108	0.000988619	0.791061	0.0728322
SNOWBALL_022100_s_st	LY6G6C	6.54236	5.94576	5.06938	4.66913	1.51215	-1.83577	-2.42273	0.006	0.0003	< 0.001	0.0483688	0.00505489	0.000242581
SNOWBALL_020837_s_st	SRPX2	5.89883	5.30063	4.84834	4.29679	1.51382	-1.36822	-2.00533	0.0038	0.0211	< 0.001	0.0350016	0.11468	0.00109981
SNOWBALL_011789_st	INTU	4.96934	4.37045	4.52483	4.36636	1.51455	1.11295	-1.00284	< 0.001	0.1115	0.965	0.000332357	0.332559	0.986775
SNOWBALL_031362_st	PDE4B	6.82999	6.23047	5.28269	4.77507	1.51521	-1.9289	-2.74233	0.0008	< 0.001	< 0.001	0.0115126	0.000349447	6.19365e-06
SNOWBALL_002368_s_st	PCLAF	8.46009	7.85959	6.96788	6.21687	1.51624	-1.85539	-3.12256	0.0012	< 0.001	< 0.001	0.0148231	0.000851922	2.9025e-06
SNOWBALL_007429_st	PDE3A	7.57742	6.97655	7.03258	6.92909	1.51664	1.03961	-1.03344	< 0.001	0.5887	0.6466	0.00077964	0.805573	0.839676
SNOWBALL_044871_st	DRAM1	3.10927	2.50824	2.44503	2.44862	1.5168	-1.04479	-1.04219	< 0.001	0.5563	0.5787	0.00104119	0.785009	0.799461
SNOWBALL_031112_st	SIK1	5.74544	5.13773	5.22213	5.22441	1.52384	1.06025	1.06193	0.0005	0.5553	0.5448	0.00810816	0.784481	0.777692
SNOWBALL_023510_s_st		8.67353	8.06581	8.18303	8.27886	1.52385	1.08464	1.15914	< 0.001	0.1839	0.0225	0.000138289	0.44413	0.119827
SNOWBALL_042268_st	ARNTL2	7.28108	6.67243	6.14203	5.85471	1.52483	-1.44433	-1.76262	< 0.001	< 0.001	< 0.001	0.000108293	0.000374262	6.413e-06
SNOWBALL_031069_st	ATP5L	6.58459	5.97299	5.47744	5.52966	1.52795	-1.40986	-1.35974	0.0007	0.0039	0.0082	0.0106922	0.0356635	0.0602532
SNOWBALL_033391_st	ABL2	6.81343	6.2016	6.00901	5.80118	1.5282	-1.14281	-1.31989	< 0.001	0.0743	0.0011	0.000630242	0.260202	0.0142435
SNOWBALL_004085_st	SMC2	7.63833	7.02431	6.44593	6.03625	1.53052	-1.49317	-1.98352	< 0.001	< 0.001	< 0.001	0.000139928	0.000241427	1.47192e-06
SNOWBALL_026592_s_st	LOC100155246	8.74223	8.12568	7.69301	7.38262	1.53321	-1.34973	-1.67372	< 0.001	0.0001	< 0.001	0.000150348	0.00292584	2.61097e-05
SNOWBALL_010555_st	VRK1	7.44225	6.82167	6.01944	5.31529	1.53749	-1.74379	-2.84095	< 0.001	< 0.001	< 0.001	0.000730554	7.39669e-05	1.59698e-07
SNOWBALL_019508_st	FAM83D	6.54288	5.92113	5.37395	4.77411	1.53874	-1.46123	-2.21456	0.0038	0.0089	< 0.001	0.0350244	0.0637065	0.000497671
SNOWBALL_025518_s_st		5.99726	5.37149	4.70954	4.54061	1.54304	-1.58221	-1.77877	0.0004	0.0003	< 0.001	0.00733271	0.00498095	0.000861647
SNOWBALL_037094_st	ZEB1	4.92834	4.30089	4.24688	4.22453	1.54484	-1.03814	-1.05435	0.0011	0.7371	0.6357	0.0142569	0.887688	0.833524
SNOWBALL_047135_st	AHRR	6.61674	5.98867	5.58691	5.28357	1.54549	-1.32112	-1.63025	0.0001	0.0047	< 0.001	0.00245531	0.0408121	0.000981707
SNOWBALL_023405_s_st	ARRB2	7.15958	6.52941	5.88246	5.40626	1.54775	-1.56586	-2.17822	0.0035	0.0029	< 0.001	0.0328259	0.0285469	0.000599811
SNOWBALL_002845_st	LOC100516919	7.97728	7.34642	6.80576	5.95909	1.54849	-1.45463	-2.61594	< 0.001	< 0.001	< 0.001	0.000358782	0.00131876	1.87084e-07
SNOWBALL_042381_st	GSAP	6.15505	5.5238	5.22757	4.86922	1.54891	-1.22793	-1.57416	< 0.001	0.0175	< 0.001	0.00115153	0.101201	0.000855159
SNOWBALL_012495_st	TAF1D	7.92696	7.29328	7.07237	6.89611	1.55152	-1.16547	-1.31692	0.0005	0.1475	0.0146	0.00777587	0.391822	0.0895033
SNOWBALL_013080_st	DTL	6.74835	6.11382	5.53708	4.95167	1.55244	-1.49147	-2.23791	0.0021	0.0042	< 0.001	0.0227585	0.0378204	0.000262908
SNOWBALL_019837_st	CREB5	6.99205	6.35659	6.30893	6.07734	1.55343	-1.03359	-1.21356	< 0.001	0.6869	0.0287	0.00148068	0.861843	0.140868
SNOWBALL_003311_st	FGF7	9.83832	9.20179	8.71204	8.74761	1.55458	-1.4042	-1.37001	< 0.001	< 0.001	< 0.001	5.22081e-05	0.000556929	0.00104875
SNOWBALL_002889_st	KNL1	6.32662	5.68898	5.2236	4.26967	1.55579	-1.38068	-2.67457	0.0012	0.0115	< 0.001	0.0156211	0.0759401	2.33002e-05
SNOWBALL_028180_st	EVI5	4.76087	4.12141	4.0016	3.8809	1.55775	-1.08659	-1.18141	< 0.001	0.2734	0.0369	0.000641525	0.55237	0.166671
SNOWBALL_013323_st	ASPM	6.56702	5.92625	5.41844	4.47243	1.55916	-1.42189	-2.73932	0.0001	0.0012	< 0.001	0.00304675	0.0147197	1.83712e-06
SNOWBALL_038130_st	SERPINE2	5.09509	4.45056	4.02226	3.98586	1.56323	-1.34564	-1.38003	0.0007	0.0131	0.008	0.0100139	0.0828004	0.0589136
SNOWBALL_000397_st	SFRP1	7.8734	7.22882	7.06272	6.5455	1.56328	-1.12203	-1.60584	< 0.001	0.203	< 0.001	0.00236953	0.469503	0.00150404
SNOWBALL_037635_st	NR1D2	4.71942	4.07368	4.00472	3.8789	1.56455	-1.04896	-1.14455	0.0012	0.6812	0.2544	0.015387	0.858732	0.531557
SNOWBALL_026649_s_st	BRCA1	6.91448	6.26755	5.66592	5.1429	1.56583	-1.51742	-2.18048	< 0.001	0.0001	< 0.001	0.0013795	0.00242745	8.98337e-06
SNOWBALL_012819_st	VWA5A	8.41912	7.77168	7.3368	6.72929	1.56639	-1.3518	-2.05963	< 0.001	0.0023	< 0.001	0.00166226	0.0242881	2.39319e-05
SNOWBALL_008706_st	STIL	6.17997	5.53201	5.09897	4.47664	1.56695	-1.35007	-2.07825	0.0005	0.011	< 0.001	0.00855509	0.073498	0.000177117
SNOWBALL_029063_st	ACTR3	5.21793	4.56985	4.55717	4.33414	1.56708	-1.00883	-1.17748	0.0014	0.9405	0.1783	0.0165722	0.977809	0.436351
SNOWBALL_008879_st	CLSPN	6.0234	5.37341	4.68424	4.3923	1.56916	-1.61235	-1.97398	< 0.001	< 0.001	< 0.001	0.000241288	0.000141489	4.87692e-06
SNOWBALL_001476_s_st	NFKBIA	7.17281	6.52159	6.03521	5.84292	1.57049	-1.40092	-1.60066	< 0.001	0.0001	< 0.001	0.000287217	0.00314289	0.000198807
SNOWBALL_021275_s_st	ANG	5.81449	5.15418	4.97415	4.47973	1.58042	-1.13291	-1.596	0.0001	0.1845	< 0.001	0.00260059	0.444956	0.00221193
SNOWBALL_036544_st	FGF7	8.88198	8.2193	7.72824	7.92919	1.58303	-1.40547	-1.22273	< 0.001	0.0003	0.0148	0.000498243	0.00525894	0.0902469
SNOWBALL_018597_st	NADK2	4.95922	4.29441	4.71711	4.59243	1.58535	1.34043	1.22945	0.0012	0.0239	0.0975	0.0152323	0.124474	0.307035
SNOWBALL_042577_st	TMSB15B	3.22402	2.55881	2.43864	2.40243	1.5858	-1.08686	-1.11449	0.0016	0.5026	0.3853	0.0185269	0.748883	0.658203
SNOWBALL_003691_st	LPAR1	8.30825	7.64291	7.46533	7.08606	1.58595	-1.13098	-1.47105	0.0002	0.2164	0.001	0.00388113	0.486425	0.01287
SNOWBALL_019571_st	NCAPG2	7.34021	6.67013	5.93661	5.11582	1.59116	-1.66269	-2.93693	0.0004	0.0002	< 0.001	0.0071763	0.00379246	4.77338e-06
SNOWBALL_020410_st	CCDC160	5.12129	4.45079	3.50476	3.47198	1.59163	-1.92656	-1.97084	0.0005	< 0.001	< 0.001	0.0076073	0.00053839	0.000400881
SNOWBALL_024133_s_st	DGCR8	5.94655	5.2738	5.37099	5.36074	1.59411	1.06969	1.06211	0.0019	0.5985	0.6373	0.0209028	0.811469	0.83458
SNOWBALL_008795_s_st	FUBP1	8.68002	8.00229	7.7769	7.52636	1.59962	-1.16909	-1.39081	< 0.001	0.0095	< 0.001	1.96658e-05	0.0665467	0.000510156
SNOWBALL_040005_st	NDC80	7.30031	6.62048	5.99681	5.17352	1.60195	-1.54079	-2.72633	0.0011	0.0022	< 0.001	0.0143599	0.0237328	3.13975e-05
SNOWBALL_012870_st	AHR	6.58837	5.90519	5.7551	5.64043	1.60567	-1.10964	-1.20143	< 0.001	0.1337	0.0132	0.00014004	0.369945	0.0833619
SNOWBALL_000645_st	NLRP3	5.21906	4.53323	4.06957	3.83549	1.60863	-1.37904	-1.62196	0.0003	0.0074	0.0003	0.0059842	0.0556854	0.0053051
SNOWBALL_022704_s_st	CCNB1	8.52757	7.84083	7.31557	6.38026	1.60964	-1.43919	-2.75217	0.0004	0.0036	< 0.001	0.00670658	0.0332944	9.92416e-06
SNOWBALL_021011_s_st	CCNB1	7.84663	7.15653	6.61465	5.84505	1.6134	-1.45587	-2.48196	0.0001	0.0011	< 0.001	0.00275056	0.0143425	8.99146e-06
SNOWBALL_032162_st	APBB2	6.38029	5.68921	5.14506	5.31259	1.61449	-1.45816	-1.2983	< 0.001	0.0006	0.009	0.00151256	0.00865605	0.0639102
SNOWBALL_009660_st	LOC100525821,LOC100154508	6.50466	5.80636	5.29286	4.76371	1.62259	-1.42751	-2.06002	< 0.001	0.0002	< 0.001	0.000366896	0.00432802	8.54389e-06
SNOWBALL_031295_st	TTC39B	4.24176	3.54208	3.53726	3.47058	1.62414	-1.00335	-1.05081	< 0.001	0.9694	0.571	0.00112378	0.988459	0.794592
SNOWBALL_022944_s_st	CLK1	6.07195	5.36871	5.67004	5.09525	1.62816	1.23228	-1.2087	0.004	0.1698	0.2105	0.0364046	0.424422	0.478706
SNOWBALL_030938_st	DEPDC1	6.06943	5.365	4.71039	4.2317	1.6295	-1.57419	-2.1936	0.0002	0.0005	< 0.001	0.00447075	0.00743771	8.34889e-05
SNOWBALL_001509_s_st	ARG2	5.76051	5.05379	5.01065	4.39665	1.63209	-1.03036	-1.57696	0.0003	0.7855	0.0007	0.00602243	0.910935	0.00980559
SNOWBALL_020452_st	SLITRK2	5.86287	5.15171	4.64139	4.09715	1.63712	-1.42437	-2.07709	0.0011	0.0115	< 0.001	0.0140798	0.0758919	0.000803178
SNOWBALL_017355_st	KIF11	7.59217	6.88092	6.19265	5.27139	1.63723	-1.61135	-3.05153	< 0.001	< 0.001	< 0.001	0.000680123	0.00089721	2.97898e-07
SNOWBALL_003352_x_st		5.22736	4.51441	4.94082	5.26156	1.63915	1.34389	1.67846	0.0015	0.0361	0.001	0.0177414	0.164167	0.0134004
SNOWBALL_002621_s_st	CCNB2	6.94075	6.22287	5.53888	4.73954	1.64477	-1.60658	-2.79594	0.0019	0.0027	< 0.001	0.0210283	0.0274992	7.70259e-05
SNOWBALL_014234_st	KCNJ2	7.95525	7.23624	6.65725	6.17986	1.64605	-1.4938	-2.07971	< 0.001	0.0007	< 0.001	0.00223949	0.0103799	8.20476e-05
SNOWBALL_022615_s_st	PLK1	9.71071	8.98756	8.17901	7.3977	1.65078	-1.75145	-3.0102	0.0006	0.0002	< 0.001	0.00881344	0.00407032	1.07736e-05
SNOWBALL_030845_st	AKAP12	4.6008	3.87433	3.86452	3.80157	1.65458	-1.00682	-1.05173	0.0009	0.9566	0.6875	0.0118581	0.983783	0.862152
SNOWBALL_044938_st	PRELP	6.3002	5.57072	5.07898	4.41218	1.65804	-1.40614	-2.23231	0.0004	0.0091	< 0.001	0.00737309	0.064574	0.000182178
SNOWBALL_025868_s_st	MCM7	6.18611	5.45486	5.04489	4.62493	1.66007	-1.32866	-1.7776	0.0034	0.0724	0.0013	0.0324741	0.255922	0.0160134
SNOWBALL_039248_st	IGFBP2	5.2219	4.49021	4.13769	4.19762	1.66058	-1.27679	-1.22484	0.0003	0.0385	0.0796	0.00480953	0.171238	0.271075
SNOWBALL_036719_st	NCAPG2	4.70109	3.96822	3.55155	3.15563	1.66195	-1.33485	-1.75637	0.0001	0.0111	< 0.001	0.00275362	0.0741069	0.00123224
SNOWBALL_021237_s_st	MGST1	4.4646	3.72816	3.42732	2.90834	1.66607	-1.23186	-1.76518	0.0028	0.1693	0.0012	0.0281389	0.423699	0.0153006
SNOWBALL_027690_st	LGR4	4.1764	3.42699	2.9432	3.10328	1.68109	-1.39842	-1.25155	0.006	0.0581	0.1908	0.0485133	0.222807	0.453542
SNOWBALL_009334_s_st	STIL	7.27874	6.52515	6.3056	5.86759	1.68597	-1.16438	-1.57741	< 0.001	0.0827	< 0.001	0.000424377	0.277628	0.00133376
SNOWBALL_022379_s_st	MCM7	7.34895	6.59479	6.02879	5.57575	1.68665	-1.48042	-2.02657	< 0.001	< 0.001	< 0.001	0.00018219	0.00205742	1.04911e-05
SNOWBALL_030092_st	CYFIP2	5.27686	4.52064	4.35769	4.0576	1.68906	-1.11958	-1.37845	< 0.001	0.1608	0.0007	0.00022619	0.411671	0.0103719
SNOWBALL_006652_st	LRRC8C	7.69332	6.9371	6.79774	6.51004	1.68906	-1.10141	-1.34449	< 0.001	0.0535	< 0.001	1.82121e-06	0.211438	0.000404369
SNOWBALL_012700_st	PRELP	9.55973	8.80328	8.2493	7.53691	1.68934	-1.46813	-2.40554	< 0.001	0.0005	< 0.001	0.000807108	0.00839078	6.86155e-06
SNOWBALL_025524_st	ZNF516	6.92753	6.17033	6.01197	5.64789	1.69021	-1.11602	-1.43638	< 0.001	0.2239	0.0007	0.000643927	0.495498	0.0104283
SNOWBALL_034820_st	SRSF2	8.52435	7.76635	7.7715	7.77358	1.69114	1.00358	1.00502	< 0.001	0.9572	0.9399	5.05599e-05	0.98397	0.977546
SNOWBALL_026546_st	LPCAT2	3.92551	3.15981	2.91105	3.03148	1.70019	-1.18819	-1.09302	< 0.001	0.0802	0.3497	0.000990077	0.27238	0.626979
SNOWBALL_021420_st	IL1R1	8.38305	7.61602	7.23267	7.11697	1.70176	-1.30437	-1.41328	< 0.001	0.0002	< 0.001	6.90405e-06	0.00330193	0.000390185
SNOWBALL_005959_s_st	ATP1B1	8.69954	7.9282	7.15058	6.74111	1.70685	-1.71431	-2.27693	< 0.001	< 0.001	< 0.001	2.26815e-05	2.09499e-05	3.40404e-07
SNOWBALL_021446_st	NASP	5.27535	4.50111	4.10611	4.01059	1.71029	-1.31494	-1.40495	< 0.001	0.0147	0.0037	0.00173651	0.0896288	0.034199
SNOWBALL_029840_st	ZBED3	3.6475	2.86633	2.61826	2.57918	1.71852	-1.18762	-1.22023	0.0001	0.124	0.0785	0.00250261	0.35396	0.268944
SNOWBALL_014054_st	LOC100520401	3.95005	3.16775	3.61093	3.71794	1.71987	1.3596	1.46428	0.0026	0.0605	0.0233	0.0264368	0.228629	0.122649
SNOWBALL_027467_st	EDNRB	4.00758	3.2252	2.90176	2.79549	1.71996	-1.25132	-1.34696	0.0008	0.1073	0.0376	0.0111975	0.325081	0.16872
SNOWBALL_041172_st	MUM1L1	3.77631	2.98997	2.66395	2.96105	1.7247	-1.25355	-1.02025	0.0015	0.1336	0.8903	0.0181377	0.369836	0.957456
SNOWBALL_030761_st	NUDCD2	5.05731	4.27036	4.23544	3.90557	1.72542	-1.0245	-1.28769	< 0.001	0.7351	0.0024	6.95888e-05	0.886607	0.0251885
SNOWBALL_032685_st	FNDC3A	5.4579	4.67023	4.37749	4.35113	1.72628	-1.22497	-1.24755	< 0.001	0.0202	0.0126	0.00019495	0.111404	0.0806706
SNOWBALL_015577_st	MCM2	5.2631	4.47204	4.03547	3.82762	1.73034	-1.35338	-1.56312	< 0.001	0.0085	0.0004	0.00155277	0.0614043	0.0070578
SNOWBALL_006571_st	SLC6A17	6.61848	5.82348	5.23947	4.51011	1.73507	-1.49901	-2.48522	< 0.001	0.0015	< 0.001	0.00218108	0.0177964	2.61425e-05
SNOWBALL_029848_st	LOC100521659	6.03172	5.22736	4.66004	4.27515	1.74637	-1.48177	-1.93484	< 0.001	0.0003	< 0.001	0.000376937	0.00594232	8.19708e-05
SNOWBALL_029481_st	TACC2	5.88437	5.07605	4.82662	4.72516	1.75117	-1.18874	-1.27535	< 0.001	0.0638	0.0128	0.000370899	0.236656	0.0817714
SNOWBALL_043895_st	LIF	7.15088	6.32126	5.61538	5.02987	1.77722	-1.63114	-2.44763	< 0.001	0.0001	< 0.001	0.000706902	0.00257709	1.1957e-05
SNOWBALL_008546_st	LOC110261055	5.49609	4.66465	4.1814	4.09161	1.77946	-1.39789	-1.48766	< 0.001	0.0029	0.0007	0.000649148	0.0285947	0.0105608
SNOWBALL_013993_st	ABCC4	4.74523	3.91283	4.09389	4.3958	1.78064	1.13371	1.39762	0.0029	0.4566	0.0587	0.028847	0.715727	0.224456
SNOWBALL_000682_st	IL1R1	8.13966	7.30546	6.96465	6.77854	1.78287	-1.26647	-1.44085	< 0.001	0.0074	0.0002	9.4464e-05	0.0557649	0.00439346
SNOWBALL_014576_st	CCL2	9.30689	8.46629	8.33275	7.501	1.79079	-1.09698	-1.95246	0.0004	0.4847	< 0.001	0.00630865	0.736259	0.00229748
SNOWBALL_014046_s_st	EDNRB	6.3049	5.46015	5.09436	5.05474	1.79596	-1.28859	-1.32446	0.0003	0.0642	0.0425	0.00550229	0.23738	0.182657
SNOWBALL_016555_st	LIF	7.32881	6.48234	5.69809	5.18269	1.7981	-1.72219	-2.46168	< 0.001	< 0.001	< 0.001	6.5622e-05	0.000132899	1.03409e-06
SNOWBALL_022929_s_st	SPAG5	5.81979	4.96409	4.33284	3.83584	1.80964	-1.5489	-2.18593	0.0006	0.0059	< 0.001	0.00863329	0.0479609	0.00111277
SNOWBALL_013211_st	LOC102161634	4.2583	3.40134	4.18199	4.21124	1.81121	1.7179	1.75309	0.0062	0.0112	0.0089	0.049505	0.0743676	0.0637265
SNOWBALL_031181_st	PDE4D	4.81577	3.93306	3.07033	2.79171	1.84384	-1.81847	-2.20586	< 0.001	< 0.001	< 0.001	0.00111441	0.0013452	0.000118161
SNOWBALL_011814_st	EDNRA	6.2796	5.39421	5.29259	4.44332	1.84727	-1.07298	-1.93306	0.0018	0.6736	0.001	0.0203152	0.854737	0.0132994
SNOWBALL_003288_st	TTC39B	6.40032	5.50259	5.56072	5.11733	1.86313	1.04112	-1.3061	< 0.001	0.7333	0.0354	0.00175193	0.885623	0.162148
SNOWBALL_038900_st	FNDC3A	4.28684	3.38684	3.28203	3.20089	1.86607	-1.07535	-1.13757	< 0.001	0.5452	0.289	0.00187497	0.777888	0.568799
SNOWBALL_019801_st	ELMO1	6.84084	5.93935	5.49087	4.83571	1.86799	-1.3646	-2.14896	< 0.001	0.0019	< 0.001	9.93991e-05	0.0210974	1.44188e-05
SNOWBALL_006848_st	TIMP3	10.1063	9.20472	8.90444	9.17326	1.86813	-1.23138	-1.02205	< 0.001	0.0032	0.7213	4.1392e-06	0.0307777	0.879553
SNOWBALL_026166_st	TNRC6B	7.2939	6.37495	6.81358	6.63553	1.89074	1.35532	1.19796	0.0019	0.096	0.309	0.0213382	0.30419	0.588878
SNOWBALL_030982_st	PDE4D	5.30688	4.38533	3.68514	3.23035	1.89414	-1.62472	-2.22681	< 0.001	0.0005	< 0.001	0.00098781	0.007737	0.000137019
SNOWBALL_012486_st	CTSC	9.16919	8.23221	7.80022	7.4484	1.91452	-1.34909	-1.72166	< 0.001	0.001	< 0.001	2.33952e-05	0.013384	0.000125877
SNOWBALL_010992_x_st		5.88829	4.94523	4.06066	3.97456	1.9226	-1.84622	-1.95976	< 0.001	< 0.001	< 0.001	0.000289526	0.000507125	0.000224184
SNOWBALL_006620_st	TXNIP	4.46481	3.47919	3.90067	4.09576	1.98018	1.3393	1.53323	0.0009	0.0993	0.021	0.0118316	0.310444	0.114289
SNOWBALL_008415_st	IL11	9.21473	8.22069	6.2987	5.50838	1.99176	-3.78946	-6.55369	< 0.001	< 0.001	< 0.001	0.000266133	4.73418e-07	1.75987e-08
SNOWBALL_030807_st	NR4A1	7.10326	6.1088	5.36214	4.78744	1.99234	-1.6779	-2.49902	< 0.001	< 0.001	< 0.001	0.000106474	0.00129794	7.01922e-06
SNOWBALL_001507_s_st	ARG2	4.80018	3.74701	3.94935	2.89929	2.07508	1.15056	-1.79966	0.0022	0.4939	0.0097	0.0234425	0.742915	0.0676911
SNOWBALL_021100_s_st	GLA	7.39052	6.32986	5.88312	5.71822	2.08589	-1.36296	-1.528	< 0.001	0.0005	< 0.001	4.68531e-06	0.00827871	0.000776682
SNOWBALL_020783_st	MUM1L1	5.80798	4.74701	4.02568	3.7536	2.08633	-1.6487	-1.99088	< 0.001	< 0.001	< 0.001	5.84591e-05	0.0017062	0.000107499
SNOWBALL_008609_st	AWN	5.62564	4.54735	3.9699	3.63659	2.11153	-1.49221	-1.88003	< 0.001	0.0091	0.0003	0.0013425	0.0645925	0.0048358
SNOWBALL_012902_st	TAF1D	8.55688	7.47809	6.81208	6.34031	2.11225	-1.58668	-2.20043	< 0.001	0.0003	< 0.001	8.67866e-05	0.00483555	5.27213e-05
SNOWBALL_013144_st	PTGS2	9.68279	8.5379	7.28852	6.68838	2.21129	-2.37739	-3.6038	< 0.001	< 0.001	< 0.001	7.12153e-05	3.10981e-05	6.70528e-07
SNOWBALL_001571_st	IL6	7.95011	6.78744	6.90654	7.15751	2.2387	1.08606	1.29242	< 0.001	0.3974	0.0157	2.9778e-05	0.66849	0.0939119
SNOWBALL_014930_st	MYOCD	5.79486	4.54487	3.89006	3.45976	2.37839	-1.57441	-2.12155	< 0.001	0.0042	< 0.001	0.000417698	0.0375985	0.00137052
SNOWBALL_029648_st	LIF	6.7354	5.42031	4.79335	4.15724	2.48819	-1.5443	-2.40005	< 0.001	0.011	< 0.001	0.00066121	0.0735444	0.000928891
SNOWBALL_017891_st	NR4A2	7.50573	6.13862	4.82484	4.41683	2.57953	-2.48593	-3.29846	< 0.001	< 0.001	< 0.001	2.98049e-05	4.31707e-05	3.15943e-06
SNOWBALL_000678_st	IL1A	9.86234	8.31847	7.30537	6.51744	2.91576	-2.01825	-3.48469	< 0.001	0.0001	< 0.001	7.60414e-05	0.00277498	1.74378e-05
SNOWBALL_011618_st	EREG	5.55213	3.83389	2.36465	2.35508	3.29034	-2.76877	-2.78719	< 0.001	< 0.001	< 0.001	0.000124612	0.000503549	0.00047616
SNOWBALL_023180_s_st	NR4A3	7.12574	5.39818	4.33226	4.10531	3.31167	-2.09351	-2.45016	< 0.001	< 0.001	< 0.001	5.37919e-06	0.000494147	8.74111e-05
SNOWBALL_011421_st	AREG	7.58506	5.80441	4.35077	3.92917	3.43581	-2.73899	-3.66863	< 0.001	< 0.001	< 0.001	4.1753e-06	2.9809e-05	2.52387e-06
SNOWBALL_014981_st	MYH2	4.35994	4.3637	5.45233	5.11022	-1.00261	2.12672	1.67773	0.973	< 0.001	< 0.001	0.98985	6.49176e-06	0.000232164
SNOWBALL_015710_st		8.58337	8.68539	9.00893	9.17375	-1.07328	1.2514	1.40285	0.0079	< 0.001	< 0.001	0.0585712	8.76838e-06	1.54755e-07
SNOWBALL_009057_st	PPIH	7.41994	7.26088	6.68086	6.3481	1.11656	-1.49486	-1.88267	0.0243	< 0.001	< 0.001	0.126039	1.54809e-05	1.82924e-07
SNOWBALL_007482_st	LMF2	7.60937	7.48956	7.10541	6.78342	1.08659	-1.30509	-1.63144	0.0131	< 0.001	< 0.001	0.0831466	1.79418e-05	4.94412e-08
SNOWBALL_006043_st	LMNA	8.81354	8.83308	8.43486	8.01844	-1.01364	-1.31789	-1.75887	0.6811	< 0.001	< 0.001	0.858705	2.83195e-05	2.79754e-08
SNOWBALL_014494_s_st	KAT7	6.6229	6.66737	6.3006	6.32537	-1.03131	-1.28947	-1.26752	0.3239	< 0.001	< 0.001	0.603215	3.28854e-05	6.39154e-05
SNOWBALL_025787_st	INIP	5.89827	5.86942	6.30776	6.23502	1.0202	1.35504	1.28842	0.6217	< 0.001	< 0.001	0.825582	7.99141e-05	0.000411167
SNOWBALL_020748_st	PRPS1L1	8.7992	8.69495	8.34582	8.09991	1.07493	-1.27379	-1.51052	0.0396	< 0.001	< 0.001	0.174535	9.47529e-05	5.35974e-07
SNOWBALL_001060_st	PPP1R11	8.03428	8.12005	8.44393	8.60586	-1.06125	1.25169	1.40037	0.0647	< 0.001	< 0.001	0.23877	9.62118e-05	1.9676e-06
SNOWBALL_007825_st	GLT8D2	7.68398	7.75322	8.19512	8.30711	-1.04917	1.35839	1.46803	0.2577	< 0.001	< 0.001	0.535178	9.62517e-05	1.11308e-05
SNOWBALL_024708_s_st	LAS1L	8.6834	8.82067	8.4789	8.40654	-1.09982	-1.26731	-1.33249	0.0091	< 0.001	< 0.001	0.0644892	0.000109334	1.77294e-05
SNOWBALL_031725_st	MIB1	7.00756	7.08369	7.346	7.24213	-1.05418	1.1994	1.11609	0.0555	< 0.001	0.0006	0.216622	0.000154398	0.00863441
SNOWBALL_023527_st		7.18194	7.39871	7.89676	8.17374	-1.16213	1.4123	1.71123	0.007	< 0.001	< 0.001	0.0537364	0.000156536	2.30669e-06
SNOWBALL_001036_st	LOC110261665	6.92758	6.63428	5.84338	5.15523	1.22544	-1.73015	-2.78764	0.0181	< 0.001	< 0.001	0.103372	0.000157547	3.77089e-07
SNOWBALL_005982_st	PCMTD1	6.90877	7.0984	7.57073	7.66742	-1.14047	1.38735	1.48352	0.0119	< 0.001	< 0.001	0.0778378	0.000165082	2.90369e-05
SNOWBALL_023089_s_st	LOC110256464	10.8528	10.7055	10.3317	10.1743	1.10747	-1.29581	-1.44522	0.0137	< 0.001	< 0.001	0.0853696	0.000171799	6.09372e-06
SNOWBALL_024338_s_st	DYNLL1	8.98334	8.82734	9.34333	9.52907	1.11419	1.42998	1.62645	0.0507	< 0.001	< 0.001	0.204396	0.000182155	9.82348e-06
SNOWBALL_013911_st	LMO7	8.30823	8.38579	7.92595	7.80654	-1.05523	-1.3754	-1.49407	0.2579	< 0.001	< 0.001	0.535354	0.000190288	2.17832e-05
SNOWBALL_002370_st	PRTG	5.75364	5.80553	5.26191	5.00792	-1.03662	-1.45763	-1.73822	0.5208	< 0.001	< 0.001	0.761555	0.000210572	5.53396e-06
SNOWBALL_021659_s_st	TKT	8.77222	8.68895	8.18431	7.74764	1.05941	-1.41877	-1.92028	0.2768	< 0.001	< 0.001	0.556064	0.000225855	5.61575e-07
SNOWBALL_009048_x_st	LOC100522323	8.89976	8.83163	8.16596	7.53188	1.04836	-1.5863	-2.46185	0.4995	< 0.001	< 0.001	0.746726	0.000249357	4.04046e-07
SNOWBALL_023389_s_st	TKT	8.05266	7.90767	7.49766	7.06005	1.10573	-1.32869	-1.79953	0.03	< 0.001	< 0.001	0.145331	0.000254405	2.35243e-07
SNOWBALL_035037_st	CDC42EP3	7.23953	7.26435	6.90669	6.89648	-1.01736	-1.28134	-1.29045	0.647	< 0.001	< 0.001	0.839904	0.000257964	0.000200357
SNOWBALL_017480_s_st	FGFR2	6.96591	6.7889	5.99688	6.02276	1.13054	-1.73149	-1.70072	0.1537	< 0.001	< 0.001	0.401063	0.000265741	0.000355894
SNOWBALL_011485_st	CTSO	7.39912	7.36584	6.77817	6.24882	1.02333	-1.50282	-2.16899	0.7097	< 0.001	< 0.001	0.873715	0.000268924	5.62507e-07
SNOWBALL_005311_st	EHBP1	7.77165	7.65487	7.26126	7.28275	1.08431	-1.31368	-1.29426	0.0661	< 0.001	< 0.001	0.241935	0.000284854	0.000465736
SNOWBALL_009543_st	HIVEP1	5.72086	5.69038	6.10018	6.31114	1.02135	1.3285	1.53768	0.6277	< 0.001	< 0.001	0.828913	0.000285007	5.65362e-06
SNOWBALL_011653_st	ABCE1	9.16546	9.03612	9.30996	9.29725	1.09379	1.20902	1.19841	0.0065	< 0.001	< 0.001	0.051008	0.000294988	0.000447596
SNOWBALL_016637_st	DYNLL1	8.15438	8.09097	8.50945	8.59699	1.04493	1.33651	1.42013	0.3312	< 0.001	< 0.001	0.610078	0.00029855	5.24644e-05
SNOWBALL_041081_st	ACO1	8.33716	8.22257	7.82045	7.64765	1.08267	-1.32145	-1.48959	0.0795	< 0.001	< 0.001	0.270914	0.0003158	1.10534e-05
SNOWBALL_024423_st	NWD1	7.12558	7.2743	7.68596	7.87266	-1.10859	1.33022	1.51399	0.0312	< 0.001	< 0.001	0.149066	0.000330596	9.82164e-06
SNOWBALL_035924_st	AGAP1	4.46718	4.77444	5.4895	5.66745	-1.23736	1.64155	1.85704	0.0126	< 0.001	< 0.001	0.0809378	0.000332464	4.29692e-05
SNOWBALL_009665_x_st	LOC110261489	8.75349	8.47684	7.75008	7.49346	1.21137	-1.65492	-1.9771	0.0259	< 0.001	< 0.001	0.13156	0.000371512	2.26345e-05
SNOWBALL_024330_s_st	RNF10,LOC102166523	7.53687	7.64618	7.8818	8.00935	-1.07871	1.17741	1.28625	0.0088	< 0.001	< 0.001	0.0632116	0.00038372	6.61106e-06
SNOWBALL_011706_st	H2AFZ	9.07791	8.81681	8.20041	7.68267	1.19839	-1.53305	-2.19488	0.0151	< 0.001	< 0.001	0.0914211	0.000385147	1.18885e-06
SNOWBALL_024754_s_st	SEC23IP	7.06261	7.04499	7.35616	7.48876	1.01229	1.24071	1.36015	0.7216	< 0.001	< 0.001	0.879715	0.000394163	1.4399e-05
SNOWBALL_018184_s_st	TTN	4.37714	4.58505	5.30263	5.23726	-1.15502	1.64442	1.57157	0.082	< 0.001	< 0.001	0.27615	0.000395513	0.000893845
SNOWBALL_026096_s_st	TKT	9.89427	9.73773	9.28937	8.81919	1.11461	-1.36449	-1.89021	0.0403	< 0.001	< 0.001	0.176584	0.000403545	4.31464e-07
SNOWBALL_045391_st	KLF7	5.53956	5.97852	7.19271	7.59889	-1.35562	2.32012	3.07454	0.0354	< 0.001	< 0.001	0.162089	0.00042114	2.98733e-05
SNOWBALL_022947_s_st	LOC100522323	8.36086	8.22837	7.56566	6.9184	1.09618	-1.58306	-2.47937	0.2241	< 0.001	< 0.001	0.495843	0.000440039	6.70883e-07
SNOWBALL_033113_st	THAP1	3.60126	3.82974	4.57227	4.79435	-1.1716	1.6731	1.95153	0.0695	< 0.001	< 0.001	0.249597	0.000442545	4.03943e-05
SNOWBALL_011590_st	ETFDH	8.42001	8.38686	8.08198	7.91397	1.02325	-1.23531	-1.38788	0.504	< 0.001	< 0.001	0.750015	0.000465736	7.71883e-06
SNOWBALL_005657_s_st	NCOA2	6.52314	6.6699	6.98164	7.04597	-1.10708	1.24121	1.2978	0.0094	< 0.001	< 0.001	0.066072	0.000477873	8.86514e-05
SNOWBALL_016498_st	KNTC1	6.13458	5.99352	5.2499	4.56715	1.10272	-1.67436	-2.68769	0.2547	< 0.001	< 0.001	0.531801	0.000503766	1.07096e-06
SNOWBALL_023077_st	TNIK	5.99153	6.1301	6.59076	6.68752	-1.10082	1.37617	1.47164	0.0808	< 0.001	< 0.001	0.273479	0.000525666	9.51627e-05
SNOWBALL_000223_st	ATP2C1	7.59566	7.86096	8.39346	8.68427	-1.20188	1.44643	1.76946	0.0075	< 0.001	< 0.001	0.0562126	0.00056629	9.86982e-06
SNOWBALL_019800_st	CAV1	10.8494	10.6574	10.2577	9.52962	1.14235	-1.31928	-2.18529	0.0097	< 0.001	< 0.001	0.0675745	0.000592968	3.08464e-08
SNOWBALL_007605_st	LARGE1	5.13355	5.35278	5.82702	6.05045	-1.16411	1.38918	1.62188	0.0122	< 0.001	< 0.001	0.0790909	0.000593364	1.7003e-05
SNOWBALL_035028_st	LOC110256344	5.50405	5.15666	4.46656	4.00694	1.27226	-1.61339	-2.2187	0.0074	< 0.001	< 0.001	0.0557528	0.000607902	5.22812e-06
SNOWBALL_002508_st	PREP	7.36999	7.47036	7.7657	7.7006	-1.07205	1.22717	1.17303	0.0551	< 0.001	0.0002	0.215492	0.000610762	0.00435734
SNOWBALL_002777_s_st	KLF9	5.81724	6.02485	5.37511	4.8913	-1.15477	-1.56888	-2.19399	0.0727	< 0.001	< 0.001	0.2565	0.000678598	3.81919e-06
SNOWBALL_003185_st	CCNDBP1	5.50252	5.71633	6.1449	6.03159	-1.15975	1.3459	1.24423	0.0089	< 0.001	0.0005	0.0634438	0.000723069	0.00747399
SNOWBALL_000879_st	LOC106510170	9.31203	9.24644	8.85638	8.54672	1.04651	-1.31045	-1.62419	0.3307	< 0.001	< 0.001	0.609584	0.000727022	3.12105e-06
SNOWBALL_035022_st	SLC2A3	5.08432	5.00373	5.96643	5.50989	1.05745	1.94896	1.42027	0.6248	< 0.001	0.0064	0.827237	0.000735489	0.0506467
SNOWBALL_012294_st	GAB2	5.50117	5.61934	6.15873	6.07567	-1.08535	1.45336	1.37205	0.2133	< 0.001	0.0001	0.4823	0.000779923	0.00293407
SNOWBALL_002213_st	NCOA7	5.88605	5.99458	6.42208	6.40622	-1.07813	1.34489	1.33019	0.1528	< 0.001	< 0.001	0.399785	0.000784924	0.00106955
SNOWBALL_011528_st	SCARB2	7.36751	7.63607	8.14836	8.32488	-1.2046	1.42631	1.61195	0.0069	< 0.001	< 0.001	0.0532464	0.000788718	5.55485e-05
SNOWBALL_032582_st	CMTR2	4.00435	4.16658	4.88491	4.83911	-1.11901	1.64527	1.59386	0.2012	< 0.001	< 0.001	0.467216	0.000797597	0.00136875
SNOWBALL_009646_x_st	LOC100622387	9.0184	8.6749	8.01173	7.3678	1.26883	-1.58356	-2.47445	0.0076	< 0.001	< 0.001	0.0569055	0.000807583	1.41912e-06
SNOWBALL_009751_st	HIST1H2BD	8.2532	8.0791	7.51077	7.31038	1.12826	-1.48281	-1.70376	0.09	< 0.001	< 0.001	0.292308	0.000809378	5.40786e-05
SNOWBALL_028815_st	UGCG	7.24501	7.17406	6.59826	6.28916	1.05041	-1.49051	-1.84664	0.4828	< 0.001	< 0.001	0.734973	0.000880824	1.75237e-05
SNOWBALL_015803_s_st	VGLL3	11.2177	11.1975	10.8684	10.631	1.01408	-1.2563	-1.48094	0.7259	< 0.001	< 0.001	0.881922	0.000889903	5.92876e-06
SNOWBALL_036874_st	NDFIP1	8.05998	8.00411	8.16742	8.14804	1.03948	1.11985	1.10491	0.0642	< 0.001	0.0001	0.237421	0.000905342	0.00246947
SNOWBALL_019427_st	UBE2C	7.33335	7.08337	6.35941	5.72248	1.18919	-1.65171	-2.56843	0.0621	< 0.001	< 0.001	0.232513	0.00090976	2.59197e-06
SNOWBALL_015711_st	LOC106505670	7.07792	6.77707	6.16184	5.64182	1.23187	-1.5318	-2.19656	0.0119	< 0.001	< 0.001	0.0775697	0.000915006	3.10523e-06
SNOWBALL_026119_st	ZDHHC9	7.32864	7.45	7.89649	7.92816	-1.08776	1.36272	1.39297	0.1359	< 0.001	< 0.001	0.373526	0.000950525	0.000532141
SNOWBALL_006607_st	CTTNBP2NL	7.6878	7.80254	8.08815	7.96096	-1.08278	1.21893	1.11607	0.0339	< 0.001	0.0055	0.157527	0.000953208	0.045633
SNOWBALL_007943_st	GOT2	9.75982	9.73313	9.49084	9.38058	1.01867	-1.18287	-1.27681	0.5354	< 0.001	< 0.001	0.771561	0.000988158	3.38815e-05
SNOWBALL_010186_st	PCK2	7.0059	6.90367	6.43918	5.80218	1.07343	-1.37983	-2.14576	0.2252	< 0.001	< 0.001	0.497281	0.00101564	2.99784e-07
SNOWBALL_042614_st	KLF12	8.20105	8.21832	8.00946	7.93896	-1.01204	-1.15577	-1.21366	0.6431	< 0.001	< 0.001	0.837757	0.00104464	8.04211e-05
SNOWBALL_000660_st	NR3C1	6.85827	7.01523	7.37999	7.4905	-1.11493	1.28767	1.39018	0.0258	< 0.001	< 0.001	0.131284	0.00104611	0.000102102
SNOWBALL_008746_st	APITD1	5.51874	5.37702	4.51825	3.98773	1.10322	-1.8135	-2.6195	0.3601	< 0.001	< 0.001	0.63645	0.00104654	1.29538e-05
SNOWBALL_005752_st	FZD6	4.1265	4.41357	5.03953	4.91489	-1.22016	1.54324	1.4155	0.0187	< 0.001	0.0003	0.105591	0.00105082	0.00568442
SNOWBALL_021000_s_st	PRPF3	5.76196	5.78956	6.12044	6.53512	-1.01932	1.25778	1.67663	0.6413	< 0.001	< 0.001	0.836785	0.00107387	5.21804e-07
SNOWBALL_003486_st	GLIPR2	7.82478	7.89287	8.19306	7.99625	-1.04832	1.23131	1.07428	0.2164	< 0.001	0.0684	0.486465	0.00109991	0.247028
SNOWBALL_043349_st	COLEC12	8.72559	8.44933	7.91581	8.02171	1.21105	-1.44745	-1.34501	0.0098	< 0.001	0.0003	0.067778	0.00111722	0.0059643
SNOWBALL_030754_st	LOC100737600,LOC110260386	6.72934	6.68101	6.19553	5.79904	1.03407	-1.40005	-1.84289	0.5823	< 0.001	< 0.001	0.801592	0.00115754	4.79355e-06
SNOWBALL_021337_s_st	JAK1	9.64076	9.68683	9.91642	9.93349	-1.03245	1.1725	1.18645	0.2747	< 0.001	< 0.001	0.553846	0.00116415	0.000640372
SNOWBALL_003247_st	TJP1	8.733	8.85805	9.10569	9.16315	-1.09055	1.18727	1.23551	0.0119	< 0.001	< 0.001	0.0775679	0.00119034	0.00019818
SNOWBALL_005828_st	ASPH	6.62116	6.85558	7.30083	7.46099	-1.17644	1.36154	1.52141	0.0093	< 0.001	< 0.001	0.0653526	0.00119617	8.05058e-05
SNOWBALL_026907_s_st	SEC11A	8.46015	8.34344	8.60475	8.66458	1.08426	1.19857	1.24931	0.0234	< 0.001	< 0.001	0.122825	0.00120591	0.000205683
SNOWBALL_000547_s_st	GNAS	5.889	5.82173	6.00353	6.00985	1.04774	1.1343	1.13928	0.0544	< 0.001	< 0.001	0.213614	0.00120875	0.000914148
SNOWBALL_000048_s_st	ACTC1	9.01933	9.38643	10.1047	9.95172	-1.28976	1.64519	1.47968	0.0116	< 0.001	0.0005	0.0761998	0.00126638	0.00749461
SNOWBALL_034578_st	TM9SF4	6.95181	6.92834	7.1854	7.24591	1.0164	1.19504	1.24623	0.6178	< 0.001	< 0.001	0.823341	0.00127409	0.00020864
SNOWBALL_023505_st	LOC102158723	6.07771	5.80399	5.24139	5.32018	1.20892	-1.47692	-1.39843	0.0156	< 0.001	0.0002	0.0932587	0.00129516	0.00410699
SNOWBALL_037003_st	FAM135A	4.80827	5.01015	5.49486	5.75533	-1.15019	1.39931	1.67618	0.0343	< 0.001	< 0.001	0.158915	0.00130959	2.80287e-05
SNOWBALL_016198_st	SST	6.46373	5.96698	4.93636	4.31553	1.41103	-2.0429	-3.14149	0.0166	< 0.001	< 0.001	0.0974352	0.00131748	1.88795e-05
SNOWBALL_009622_x_st	LOC100158117	10.9886	10.759	10.3272	10.2301	1.17257	-1.3489	-1.44279	0.0095	< 0.001	< 0.001	0.0664756	0.00134348	0.000238962
SNOWBALL_007626_st	APPL2	6.45598	6.5941	7.22246	7.24891	-1.10047	1.54581	1.57441	0.2415	< 0.001	< 0.001	0.51679	0.00135205	0.000966326
SNOWBALL_021839_st	CENPN	7.04594	6.61543	5.63082	5.09213	1.34771	-1.97877	-2.87447	0.0279	< 0.001	< 0.001	0.138303	0.00135865	2.75075e-05
SNOWBALL_012716_st	MDM4	6.85526	6.78021	6.32995	6.35968	1.05339	-1.36629	-1.33842	0.3707	< 0.001	< 0.001	0.645809	0.00136774	0.00233137
SNOWBALL_026957_s_st	ECM1	8.92496	8.89701	9.34337	9.44357	1.01956	1.36259	1.46059	0.7339	< 0.001	< 0.001	0.885907	0.00136922	0.000244324
SNOWBALL_004130_st	UGCG	8.07932	7.93733	7.43125	7.0247	1.10342	-1.42019	-1.88249	0.1421	< 0.001	< 0.001	0.38343	0.00141388	6.47838e-06
SNOWBALL_023047_s_st	VGLL3	10.4109	10.4281	10.0369	9.70897	-1.01203	-1.31149	-1.64623	0.8113	< 0.001	< 0.001	0.922951	0.00141469	5.37919e-06
SNOWBALL_009569_x_st	LOC100621915	7.96341	7.78506	7.35694	6.97895	1.13159	-1.34548	-1.7485	0.0358	< 0.001	< 0.001	0.163421	0.00141949	4.30187e-06
SNOWBALL_013912_st	LMO7	9.0296	9.01874	8.71542	8.61287	1.00756	-1.23398	-1.32488	0.8463	< 0.001	< 0.001	0.938818	0.00142273	0.000113061
SNOWBALL_001647_s_st	GPM6B	6.85711	6.99777	7.46146	7.40677	-1.10241	1.37906	1.32776	0.1162	< 0.001	0.0002	0.340902	0.00147571	0.00384424
SNOWBALL_000147_st	SPOP	7.15177	7.1056	7.37264	7.43592	1.03253	1.20334	1.25729	0.3602	< 0.001	< 0.001	0.636522	0.00153018	0.000253207
SNOWBALL_022845_s_st	CHI3L2	2.24296	2.52852	4.01637	4.79691	-1.21888	2.80471	4.81784	0.3113	< 0.001	< 0.001	0.59131	0.00153126	3.63874e-05
SNOWBALL_004621_st	NCAPH	6.19546	5.77414	5.01394	4.34536	1.33916	-1.69372	-2.69218	0.0082	< 0.001	< 0.001	0.0600745	0.00154456	4.87606e-06
SNOWBALL_042599_st	ENO1	4.91224	4.89388	5.21818	5.39613	1.01281	1.25205	1.41642	0.7623	< 0.001	< 0.001	0.899839	0.00155599	3.20217e-05
SNOWBALL_023908_st	TTN	4.83232	5.10294	5.75477	5.71101	-1.20632	1.57116	1.52422	0.0386	< 0.001	0.0001	0.171678	0.00157609	0.00269367
SNOWBALL_002255_st	TRMT11	5.10433	4.76832	4.10607	3.86566	1.26226	-1.58255	-1.8695	0.0145	< 0.001	< 0.001	0.0888733	0.00163447	0.000112469
SNOWBALL_005597_st	TAF2	8.81834	8.79607	9.11169	9.09638	1.01556	1.24455	1.23142	0.7087	< 0.001	0.0001	0.873154	0.00166652	0.0024481
SNOWBALL_008720_st	HMGN2	9.34892	9.19077	8.67903	8.42161	1.11586	-1.42577	-1.70428	0.1155	< 0.001	< 0.001	0.33956	0.0016751	4.65512e-05
SNOWBALL_022055_s_st	INTS13	6.66006	6.5559	6.86055	7.00482	1.07487	1.23512	1.36502	0.0846	< 0.001	< 0.001	0.281516	0.00169627	5.70714e-05
SNOWBALL_013980_st	DIAPH3	8.03123	7.62325	6.82207	5.98907	1.32682	-1.74254	-3.10411	0.0148	< 0.001	< 0.001	0.0900157	0.0017261	2.53259e-06
SNOWBALL_011431_st	LOC100737184	8.85332	8.86842	8.52745	8.36024	-1.01052	-1.26661	-1.42225	0.816	< 0.001	< 0.001	0.925101	0.00178369	5.44344e-05
SNOWBALL_025573_st	EGLN1	7.00148	7.31065	7.86925	7.85314	-1.23899	1.47284	1.45649	0.0093	< 0.001	< 0.001	0.0654114	0.00178401	0.00223678
SNOWBALL_006890_st	AAAS	6.19874	5.94002	5.41386	5.00222	1.19642	-1.44009	-1.9156	0.0185	< 0.001	< 0.001	0.104961	0.0018137	9.84043e-06
SNOWBALL_005165_st	CENPO	5.89678	5.66235	4.87451	4.47066	1.17644	-1.72649	-2.28421	0.1327	< 0.001	< 0.001	0.368317	0.00182994	4.87597e-05
SNOWBALL_024750_s_st	FGFR2	5.67136	5.74319	4.95985	4.93877	-1.05105	-1.72111	-1.74644	0.632	< 0.001	< 0.001	0.831401	0.00183053	0.00148839
SNOWBALL_002819_st	CEP152	5.54969	5.25046	4.64986	4.27587	1.23049	-1.51634	-1.96508	0.0174	< 0.001	< 0.001	0.100715	0.00183606	2.51133e-05
SNOWBALL_004988_s_st	LOC100515114	7.51323	7.58441	7.84193	8.05178	-1.05057	1.19542	1.38259	0.1608	< 0.001	< 0.001	0.411656	0.00184252	8.46361e-06
SNOWBALL_010723_st	DAD1	9.34474	9.35038	9.61197	9.64667	-1.00392	1.1988	1.22799	0.9102	< 0.001	< 0.001	0.965678	0.00186536	0.000675924
SNOWBALL_012866_st	CDK6	8.24456	8.14461	7.88689	7.63324	1.07174	-1.19558	-1.4254	0.0561	< 0.001	< 0.001	0.217997	0.00186981	3.66999e-06
SNOWBALL_009706_x_st	LOC110261664	10.0552	9.69061	9.06262	8.77401	1.28755	-1.54541	-1.88766	0.0072	< 0.001	< 0.001	0.0547244	0.00188631	7.11986e-05
SNOWBALL_019310_st	AHCY	7.56869	7.44806	6.95988	6.50098	1.08721	-1.40268	-1.92797	0.2086	< 0.001	< 0.001	0.47644	0.00188983	4.61019e-06
SNOWBALL_017383_st	EGLN1	8.20695	8.43963	8.9137	8.94975	-1.17502	1.38902	1.42416	0.0194	< 0.001	< 0.001	0.108375	0.0019156	0.00106624
SNOWBALL_040065_st	U2AF2	8.6446	8.64513	8.34531	8.22227	-1.00037	-1.23099	-1.34058	0.9926	< 0.001	< 0.001	0.997256	0.00191619	9.90935e-05
SNOWBALL_009692_s_st	LOC595122	9.46796	9.29886	8.83193	8.31225	1.12436	-1.38216	-1.98151	0.0735	< 0.001	< 0.001	0.258253	0.00192813	2.06827e-06
SNOWBALL_046640_st	TNIK	6.28189	6.61858	7.42811	7.63015	-1.26285	1.75264	2.0161	0.0429	< 0.001	< 0.001	0.183656	0.00193072	0.000300218
SNOWBALL_034249_st	C5H12orf45	4.22636	4.32304	5.05349	4.99715	-1.06931	1.65916	1.59562	0.4944	< 0.001	0.0002	0.743214	0.00194318	0.00357273
SNOWBALL_032852_st	EXOC1	7.65142	7.80041	8.17477	8.12441	-1.10879	1.29626	1.2518	0.0518	< 0.001	0.0003	0.207211	0.00195427	0.00568737
SNOWBALL_003312_st	NDUFAF1	5.79885	5.92893	6.34894	6.57105	-1.09436	1.33793	1.56062	0.1219	< 0.001	< 0.001	0.350502	0.00197346	4.8365e-05
SNOWBALL_027382_st	RAB31	7.87823	7.71874	8.00399	7.96504	1.11689	1.21863	1.18616	0.0095	< 0.001	0.0003	0.0667343	0.00200196	0.00591055
SNOWBALL_005111_st	STON1	7.04535	7.22027	7.77745	7.89863	-1.1289	1.47139	1.60032	0.1182	< 0.001	< 0.001	0.344161	0.00201233	0.000395352
SNOWBALL_034231_st	DIAPH3	6.48048	6.10364	5.46608	4.52939	1.2985	-1.55569	-2.9778	0.0068	< 0.001	< 0.001	0.0525983	0.00202486	4.68038e-07
SNOWBALL_002798_s_st	MGA	7.26566	7.27809	7.57163	7.59023	-1.00866	1.22564	1.24155	0.8267	< 0.001	< 0.001	0.930077	0.00203546	0.00125335
SNOWBALL_017273_s_st	SEC23IP	8.11437	8.14081	8.43197	8.5238	-1.0185	1.22362	1.30404	0.6407	< 0.001	< 0.001	0.83645	0.00207974	0.00020743
SNOWBALL_027813_st	C3H16orf72	7.73157	7.77335	8.1159	8.15955	-1.02938	1.26799	1.30695	0.5323	< 0.001	< 0.001	0.769399	0.00209148	0.000798731
SNOWBALL_016621_st		4.94429	4.95154	5.62118	5.65561	-1.00503	1.59068	1.6291	0.9555	< 0.001	< 0.001	0.983368	0.00209148	0.00141602
SNOWBALL_039999_st		7.06673	6.9964	6.50599	6.51215	1.04996	-1.40484	-1.39886	0.4639	< 0.001	< 0.001	0.7213	0.00209442	0.00231038
SNOWBALL_036913_st	SYNM	4.1768	4.54963	5.48073	5.74859	-1.29489	1.90672	2.29574	0.0524	< 0.001	< 0.001	0.208764	0.00209698	0.000253632
SNOWBALL_034677_st	GPCPD1	7.69831	7.36604	6.66601	6.43987	1.25899	-1.62454	-1.90023	0.0247	< 0.001	< 0.001	0.127613	0.00213201	0.000202431
SNOWBALL_023257_st	LOC100155572	4.77435	4.85478	4.54039	4.48798	-1.05733	-1.24348	-1.28949	0.2005	< 0.001	< 0.001	0.466154	0.00213588	0.000609153
SNOWBALL_025145_st	GCLC	5.79483	5.74453	5.335	5.2165	1.03549	-1.32825	-1.44196	0.5305	< 0.001	< 0.001	0.768205	0.00213791	0.000256065
SNOWBALL_017189_s_st	FGFR2	5.90252	5.8325	5.4029	5.27729	1.04973	-1.34686	-1.46939	0.4093	< 0.001	< 0.001	0.678306	0.00220323	0.000259663
SNOWBALL_020183_st	SMC1A	7.61706	7.4547	7.17914	7.00444	1.11911	-1.21046	-1.36628	0.0074	< 0.001	< 0.001	0.056088	0.00220794	2.96618e-05
SNOWBALL_025712_s_st	TYMS	8.60155	8.39256	8.01862	7.85548	1.15588	-1.29589	-1.45102	0.0103	< 0.001	< 0.001	0.0705423	0.0022082	9.91977e-05
SNOWBALL_023600_s_st	GPM6B	7.12744	7.10231	7.7763	7.67016	1.01758	1.59548	1.48231	0.8492	< 0.001	0.0005	0.939995	0.00226376	0.00778694
SNOWBALL_005379_s_st	KIDINS220	7.26254	7.24012	7.69552	7.95092	1.01566	1.37117	1.63672	0.8025	< 0.001	< 0.001	0.918932	0.00231499	4.83114e-05
SNOWBALL_004708_st		4.04191	3.725	4.51167	4.82416	1.24567	1.7251	2.14231	0.0541	< 0.001	< 0.001	0.212911	0.00233578	0.000136612
SNOWBALL_040006_st	RALGPS2	4.81535	4.96537	5.7174	5.7094	-1.10958	1.68416	1.67485	0.319	< 0.001	0.0001	0.598683	0.00235325	0.00254592
SNOWBALL_023601_s_st	GPM6B	5.55133	5.67445	6.09941	6.21154	-1.08909	1.34253	1.45103	0.1555	< 0.001	< 0.001	0.403862	0.00238866	0.00034666
SNOWBALL_018227_st	LOC100521170	5.7511	5.61467	5.30658	5.24283	1.09918	-1.23806	-1.29401	0.0371	< 0.001	< 0.001	0.167334	0.00242598	0.000525789
SNOWBALL_030713_st	SPEN	7.34596	7.45525	7.72875	7.71436	-1.0787	1.20873	1.19674	0.057	0.0001	0.0002	0.220303	0.00243283	0.00365229
SNOWBALL_000186_s_st	SUPT4H1	7.16254	7.11996	6.83659	6.73323	1.02996	-1.21703	-1.30742	0.4522	0.0001	< 0.001	0.712306	0.00245265	0.000180172
SNOWBALL_004759_st	LOC100516004	6.26432	6.10121	5.66211	5.39991	1.1197	-1.35577	-1.62597	0.0751	0.0001	< 0.001	0.26178	0.00245915	4.17309e-05
SNOWBALL_008861_st	GLIS1	7.18905	7.09467	6.79918	6.86575	1.06761	-1.22731	-1.17196	0.1216	0.0001	0.0011	0.349841	0.00248151	0.0143184
SNOWBALL_000042_s_st	ACTC1	8.5442	8.8652	9.45934	9.19866	-1.2492	1.50957	1.26002	0.0138	0.0001	0.0111	0.0859075	0.00248377	0.0738563
SNOWBALL_014300_s_st	STAT3	8.44884	8.46776	8.74398	8.65325	-1.0132	1.21102	1.13721	0.7306	0.0001	0.0034	0.884267	0.00249258	0.0322354
SNOWBALL_034325_st	COL5A2	5.01352	5.09545	5.76988	6.01832	-1.05843	1.59596	1.89588	0.5444	0.0001	< 0.001	0.777474	0.00255727	0.000185352
SNOWBALL_025793_s_st	PSMG1	6.99141	6.86638	7.23979	7.28903	1.09052	1.29541	1.34039	0.1077	0.0001	< 0.001	0.325819	0.0025884	0.000973681
SNOWBALL_016240_st	CKS2	6.98558	6.82404	6.33327	5.85032	1.11848	-1.4052	-1.96391	0.1136	0.0001	< 0.001	0.336261	0.00260461	5.53396e-06
SNOWBALL_018012_st	TTN	4.64166	4.7407	5.40241	5.24422	-1.07106	1.58196	1.41766	0.4578	0.0001	0.0014	0.71667	0.00261554	0.0166475
SNOWBALL_024066_st	ZNF664	7.79666	7.88336	8.1907	8.22825	-1.06194	1.23742	1.27005	0.1714	0.0001	< 0.001	0.426735	0.00264451	0.00106627
SNOWBALL_027496_st		6.39687	6.70482	7.34765	7.44527	-1.23794	1.5614	1.6707	0.0274	0.0001	< 0.001	0.136744	0.0026831	0.000875904
SNOWBALL_005226_st	EVA1A	5.78804	5.98879	6.41181	6.57661	-1.14929	1.34073	1.50297	0.0287	0.0001	< 0.001	0.141017	0.00268543	0.000170358
SNOWBALL_024360_s_st	RBM19	4.26163	4.1436	3.93011	4.04011	1.08525	-1.15949	-1.07437	0.0129	0.0001	0.0261	0.0822578	0.00271322	0.132194
SNOWBALL_002764_st	TMEM260	5.82218	6.08391	6.62546	6.95735	-1.19892	1.45553	1.83202	0.0275	0.0001	< 0.001	0.136927	0.00287775	4.65381e-05
SNOWBALL_007703_s_st	IGF1	10.8243	10.7638	10.2804	10.1999	1.04282	-1.39805	-1.47822	0.5392	0.0001	< 0.001	0.774153	0.00289967	0.0008596
SNOWBALL_023894_s_st	INPP1	7.15225	6.92232	6.47411	6.5317	1.17278	-1.36434	-1.31095	0.0208	0.0001	0.0005	0.113505	0.00296526	0.00788807
SNOWBALL_000225_s_st	MYD88	7.11121	7.222	7.50363	7.46042	-1.07982	1.21557	1.1797	0.0668	0.0001	0.0006	0.243613	0.00296679	0.00955071
SNOWBALL_023266_st	DBF4	6.42606	6.22698	5.82448	5.63603	1.14797	-1.3218	-1.50624	0.0252	0.0001	< 0.001	0.129339	0.00300434	0.00011797
SNOWBALL_013817_st	COG6	6.92088	6.89848	7.05997	7.07696	1.01565	1.11844	1.13169	0.4988	0.0001	< 0.001	0.746272	0.00300749	0.00139217
SNOWBALL_004781_st	CKAP2L	7.1809	6.87483	6.29685	5.61009	1.23634	-1.49276	-2.40283	0.0179	0.0001	< 0.001	0.102769	0.00305214	2.63871e-06
SNOWBALL_009703_st	LOC110261486	6.67757	6.39404	5.79739	5.25056	1.21717	-1.5122	-2.20913	0.031	0.0001	< 0.001	0.148466	0.00305939	9.46088e-06
SNOWBALL_005214_st	AHSA2	4.24428	4.19924	4.82579	4.98599	1.03171	1.54387	1.72518	0.7256	0.0001	< 0.001	0.88177	0.00310094	0.000496227
SNOWBALL_029053_st	VGF	5.77652	5.66626	4.9146	4.22548	1.07943	-1.68373	-2.71468	0.4767	0.0001	< 0.001	0.730505	0.00310758	9.66359e-06
SNOWBALL_000824_st	RIPK2	6.49624	6.31294	6.66224	6.68318	1.13548	1.27394	1.29257	0.0194	0.0001	< 0.001	0.108237	0.00317739	0.00204185
SNOWBALL_022524_st	FABP4	3.41211	3.6739	4.56365	4.31562	-1.19896	1.85286	1.56019	0.1654	0.0001	0.0026	0.418119	0.00323418	0.0264994
SNOWBALL_013359_st	ZBTB41	7.33326	7.43107	7.91738	7.95471	-1.07015	1.40085	1.43758	0.3352	0.0001	< 0.001	0.613681	0.00323876	0.00184494
SNOWBALL_005073_s_st	LOC100515114	8.3981	8.54424	8.91144	8.98842	-1.1066	1.28985	1.36054	0.068	0.0002	< 0.001	0.246095	0.00334781	0.000744712
SNOWBALL_009206_st	ZZZ3	7.33588	7.45839	7.71164	7.83905	-1.08863	1.19189	1.30193	0.0302	0.0002	< 0.001	0.146043	0.0033609	0.000109173
SNOWBALL_009822_s_st	NRM	7.43875	7.08737	6.31656	5.33526	1.27578	-1.70623	-3.36851	0.041	0.0002	< 0.001	0.178545	0.00358049	2.25957e-06
SNOWBALL_025561_s_st	ECM1	8.08813	8.04911	8.50781	8.51735	1.02742	1.37431	1.38343	0.684	0.0002	0.0001	0.860244	0.00359085	0.00307823
SNOWBALL_009678_st	LOC110261669	8.77633	8.42771	7.87351	7.3704	1.27334	-1.46835	-2.08105	0.0075	0.0002	< 0.001	0.0562618	0.0036396	1.23912e-05
SNOWBALL_011039_st	HSP90AA1	10.3824	10.4064	10.624	10.8496	-1.01676	1.16278	1.35955	0.5996	0.0002	< 0.001	0.812189	0.00366372	6.64763e-06
SNOWBALL_030722_st	ADO	4.22181	4.17817	4.46377	4.45702	1.03071	1.21892	1.21323	0.4688	0.0002	0.0002	0.724797	0.00368538	0.00438871
SNOWBALL_013869_st	RB1	7.62733	7.72049	7.96891	7.96291	-1.0667	1.18791	1.18298	0.0877	0.0002	0.0002	0.287693	0.00371426	0.00444249
SNOWBALL_041575_st	LMO7	6.37349	6.25396	5.83444	5.6934	1.08638	-1.33748	-1.47484	0.1863	0.0002	< 0.001	0.447373	0.00373681	0.000358871
SNOWBALL_009129_st	EIF3I	8.98181	8.86291	8.5844	8.3242	1.08591	-1.21294	-1.45267	0.0552	0.0002	< 0.001	0.215589	0.00374815	1.13303e-05
SNOWBALL_026468_st	VPS35	9.12496	9.2142	9.43692	9.40377	-1.06382	1.16693	1.14042	0.0702	0.0002	0.0008	0.251067	0.00376618	0.0113109
SNOWBALL_016481_s_st	KMT5A	6.09489	6.31801	6.6715	6.98139	-1.16726	1.27764	1.58378	0.008	0.0002	< 0.001	0.0588794	0.00401159	1.66235e-05
SNOWBALL_036453_st	TRA2B	7.85942	7.7051	7.27757	7.15025	1.1129	-1.34493	-1.46902	0.1025	0.0002	< 0.001	0.316362	0.00402073	0.000505066
SNOWBALL_030559_st	PTPN4	2.79507	2.79649	3.47936	3.30779	-1.00099	1.60533	1.42533	0.9921	0.0002	0.0025	0.997082	0.00406158	0.0255531
SNOWBALL_008478_st	AP2A1	7.2188	7.25603	6.94351	6.8522	-1.02614	-1.24187	-1.32301	0.5761	0.0002	< 0.001	0.797816	0.00406358	0.00053014
SNOWBALL_011580_st	PPIC	7.92226	8.07638	8.38236	8.5542	-1.11274	1.23626	1.39264	0.0283	0.0002	< 0.001	0.139754	0.00409589	9.81639e-05
SNOWBALL_018994_s_st	ASAH1	8.70412	8.99825	9.45269	9.47102	-1.22615	1.37025	1.38777	0.007	0.0002	0.0001	0.0536144	0.00413363	0.0030869
SNOWBALL_001038_st	LOC100525821,LOC100512420	5.94561	5.51742	4.8555	4.6313	1.34554	-1.58219	-1.8482	0.007	0.0002	< 0.001	0.0540181	0.0041679	0.000402546
SNOWBALL_008790_st	CTH	7.69143	7.4654	7.07995	6.50232	1.16961	-1.30627	-1.94947	0.0132	0.0002	< 0.001	0.083473	0.00432085	1.135e-06
SNOWBALL_003052_st	ARHGAP11A	6.81681	6.43164	5.78075	5.18542	1.30602	-1.57013	-2.37218	0.0127	0.0002	< 0.001	0.0811756	0.00438934	1.53491e-05
SNOWBALL_022890_st	IRS1	7.04894	7.07053	6.73595	6.49307	-1.01508	-1.26102	-1.49222	0.7638	0.0002	< 0.001	0.900449	0.00441035	4.21039e-05
SNOWBALL_032659_st	FOXP1	9.17922	9.14236	8.92599	8.77509	1.02588	-1.16181	-1.28991	0.4325	0.0002	< 0.001	0.697019	0.0044869	5.07577e-05
SNOWBALL_043067_st	ARL14EP	3.10001	3.21091	3.46516	3.53429	-1.0799	1.19272	1.25126	0.0559	0.0002	< 0.001	0.21747	0.0044885	0.000680761
SNOWBALL_036927_st	LOC100513133	10.4788	10.3193	9.99412	9.73878	1.11686	-1.25286	-1.49543	0.0341	0.0002	< 0.001	0.158307	0.00449804	3.14598e-05
SNOWBALL_032198_st	SORT1	6.37971	6.4825	6.85388	6.6826	-1.07385	1.29359	1.14878	0.2098	0.0002	0.0217	0.477998	0.00452819	0.116775
SNOWBALL_001716_s_st	ARHGEF9	6.35352	6.0442	5.32231	4.36212	1.23912	-1.64933	-3.2089	0.0602	0.0002	< 0.001	0.227845	0.00452995	2.42288e-06
SNOWBALL_005613_st	ZHX1	7.3189	7.35384	7.58997	7.63786	-1.02452	1.17782	1.21758	0.4948	0.0002	< 0.001	0.743472	0.00453035	0.00109581
SNOWBALL_017441_s_st	VSTM4	8.78497	8.68667	8.37636	8.14004	1.07051	-1.23998	-1.46067	0.1544	0.0002	< 0.001	0.402235	0.00453517	3.61256e-05
SNOWBALL_002254_st	MAN1A1	5.74394	5.86897	6.34278	6.5286	-1.09053	1.38878	1.57968	0.2336	0.0002	< 0.001	0.507293	0.00473505	0.000333703
SNOWBALL_046655_st	COL5A2	8.35797	8.40239	9.01617	9.18785	-1.03127	1.53026	1.72364	0.7391	0.0002	< 0.001	0.888625	0.00479494	0.000699291
SNOWBALL_008526_st	ZNF583	4.79953	4.87513	5.31351	5.35086	-1.05379	1.35509	1.39063	0.4312	0.0002	0.0001	0.696009	0.00479863	0.00262116
SNOWBALL_027823_st	TOM1L1	4.47801	4.6874	5.50096	5.55	-1.1562	1.75754	1.81831	0.2464	0.0003	0.0001	0.522539	0.00486188	0.00316316
SNOWBALL_006155_st	KIFAP3	7.83028	7.9619	8.17579	8.11102	-1.09552	1.15981	1.10889	0.0111	0.0003	0.005	0.074135	0.00493667	0.0425537
SNOWBALL_021847_s_st	KIDINS220	6.33608	6.31415	6.83934	7.1181	1.01532	1.43912	1.74587	0.8481	0.0003	< 0.001	0.939577	0.00495035	0.000150348
SNOWBALL_022762_s_st	C7H14orf1	9.48117	9.44905	9.26483	9.07413	1.02251	-1.13621	-1.29678	0.4286	0.0003	< 0.001	0.693988	0.00497647	1.00534e-05
SNOWBALL_032599_st	KRAS	6.79258	6.72599	7.14439	7.07253	1.04724	1.33645	1.27151	0.4695	0.0003	0.0014	0.725294	0.00500307	0.0169584
SNOWBALL_021154_s_st	MDH2	9.79196	9.72814	9.52095	9.45767	1.04523	-1.15444	-1.2062	0.1708	0.0003	< 0.001	0.425926	0.00500436	0.000619795
SNOWBALL_013794_st	BRCA2	6.17813	5.93916	5.5134	5.22334	1.18015	-1.34328	-1.64242	0.0189	0.0003	< 0.001	0.106296	0.00501104	6.41707e-05
SNOWBALL_035365_st	IL1RAP	8.70946	8.72236	8.3108	8.307	-1.00898	-1.33013	-1.33363	0.886	0.0003	0.0002	0.955639	0.00506647	0.0047494
SNOWBALL_015795_st	GBE1	6.60851	6.80649	7.29779	7.2732	-1.14709	1.40571	1.38196	0.0795	0.0003	0.0004	0.27098	0.00506747	0.00722547
SNOWBALL_028203_st	CCSER2	4.89033	4.93561	5.66309	5.63338	-1.03188	1.65575	1.622	0.7764	0.0003	0.0004	0.90641	0.0051057	0.00682959
SNOWBALL_042772_st	SMAD3	5.77088	5.70709	6.02025	5.97763	1.04521	1.24243	1.20626	0.3592	0.0003	0.001	0.635711	0.00516569	0.0135332
SNOWBALL_019830_st	PURB	7.60704	7.49278	7.19838	7.10593	1.08242	-1.22638	-1.30753	0.0913	0.0003	< 0.001	0.294978	0.00519796	0.000614222
SNOWBALL_001809_s_st	ATG4A	6.56524	6.68287	7.01165	7.28822	-1.08495	1.25595	1.52135	0.1174	0.0003	< 0.001	0.342781	0.0052197	2.87432e-05
SNOWBALL_037576_st		5.53278	5.54463	5.8858	5.82919	-1.00825	1.26678	1.21804	0.8744	0.0003	0.0014	0.950921	0.00524724	0.0169526
SNOWBALL_031636_st	RBL2	5.4598	5.64448	6.02941	6.36001	-1.13657	1.30579	1.64208	0.0414	0.0003	< 0.001	0.179591	0.00525628	2.63785e-05
SNOWBALL_020984_s_st	IFNAR1	6.58328	6.54711	6.8844	7.12386	1.02539	1.26338	1.49148	0.6269	0.0003	< 0.001	0.828511	0.00525938	5.85445e-05
SNOWBALL_016839_s_st	GPR137B	5.52803	5.78589	6.44401	6.63313	-1.1957	1.57802	1.79906	0.089	0.0003	< 0.001	0.290325	0.0052605	0.000744712
SNOWBALL_018091_s_st	ITGAV	7.84918	8.08302	8.45388	8.46854	-1.17596	1.29313	1.30633	0.0102	0.0003	0.0002	0.0698471	0.00528982	0.00400857
SNOWBALL_037155_st		6.89625	6.92295	7.4084	7.60138	-1.01868	1.40002	1.6004	0.8031	0.0003	< 0.001	0.919192	0.00536027	0.0003763
SNOWBALL_002906_s_st	MAP2K1	6.1007	6.07263	6.44041	6.45049	1.01965	1.29036	1.29942	0.7301	0.0003	0.0002	0.884017	0.00543494	0.00449225
SNOWBALL_033975_st	SGO1	4.0755	3.99143	3.40619	3.05719	1.06	-1.50029	-1.91089	0.5188	0.0003	< 0.001	0.760236	0.00549497	0.000117135
SNOWBALL_017887_st	GPR155	6.4787	6.85993	7.42578	7.38723	-1.30246	1.48025	1.44123	0.007	0.0003	0.0006	0.0537269	0.00552118	0.00891383
SNOWBALL_036394_st		1.35099	1.25964	1.65086	1.19937	1.06537	1.3115	-1.04266	0.2999	0.0003	0.4899	0.58008	0.00553432	0.740063
SNOWBALL_002439_st	SNX3	6.86865	7.01203	7.32798	7.51596	-1.10449	1.24483	1.41808	0.0541	0.0003	< 0.001	0.212979	0.0056002	0.000121246
SNOWBALL_042346_st	EPB41L1	5.32082	5.58649	6.05803	6.04478	-1.2022	1.38659	1.37391	0.0201	0.0003	0.0004	0.111071	0.00560131	0.00683381
SNOWBALL_013331_st	KDM5B	6.59348	6.80266	7.11058	7.26543	-1.15603	1.23792	1.37818	0.0067	0.0003	< 0.001	0.0522444	0.00560285	0.000209258
SNOWBALL_002239_st	MCM9	5.92396	5.94758	5.63947	5.51427	-1.0165	-1.23808	-1.35033	0.7302	0.0003	< 0.001	0.884059	0.00560299	0.000376309
SNOWBALL_013633_st	USP6NL	7.87657	7.76279	7.58573	7.50263	1.08205	-1.13059	-1.19762	0.0096	0.0003	< 0.001	0.066893	0.00561841	0.000257128
SNOWBALL_002235_st	HEY2	8.83327	8.66543	8.397	8.19696	1.12338	-1.2045	-1.38364	0.0113	0.0003	< 0.001	0.0752415	0.00565343	5.32197e-05
SNOWBALL_014232_st	CEP112	5.73501	5.51522	5.0713	4.91548	1.16456	-1.3603	-1.51545	0.0378	0.0003	< 0.001	0.169467	0.00566836	0.000540647
SNOWBALL_026906_s_st	PKD2L2,LOC100520183	7.98969	8.08053	8.33934	8.52911	-1.06499	1.19649	1.3647	0.1281	0.0003	< 0.001	0.360942	0.00567309	5.70961e-05
SNOWBALL_042046_st	RALGAPB	6.25804	6.39933	6.68988	6.78522	-1.10289	1.2231	1.30667	0.041	0.0003	< 0.001	0.178472	0.00568295	0.000625548
SNOWBALL_016163_st	EIF4A2	5.81013	5.93397	5.24444	5.65856	-1.08963	-1.61276	-1.21033	0.424	0.0003	0.0868	0.690154	0.00570055	0.285919
SNOWBALL_004281_s_st	ACTB	13.3018	13.2389	13.1296	13.0023	1.04456	-1.07871	-1.17826	0.0184	0.0003	< 0.001	0.104598	0.00576968	6.81498e-06
SNOWBALL_024442_st	AP3M1	7.8543	7.74396	8.06033	8.17823	1.07948	1.24519	1.35123	0.1317	0.0003	< 0.001	0.366819	0.0058245	0.000488025
SNOWBALL_024488_st	REEP3	7.81062	7.89123	8.30757	8.49766	-1.05746	1.33454	1.52249	0.3922	0.0003	< 0.001	0.664185	0.00593797	0.000297315
SNOWBALL_018265_st	AGAP1	6.19548	6.25717	6.47107	6.52188	-1.04369	1.15982	1.2014	0.2092	0.0003	< 0.001	0.477173	0.00598382	0.00119966
SNOWBALL_015379_st	SELENOK	5.34766	5.31804	5.0658	5.11295	1.02075	-1.19106	-1.15276	0.6025	0.0003	0.002	0.814039	0.00610643	0.0222334
SNOWBALL_020324_st	OGT	8.3321	8.37686	8.67927	8.58209	-1.03151	1.23321	1.15287	0.5132	0.0003	0.0074	0.756302	0.00615378	0.0557281
SNOWBALL_047051_st	PIK3C2A	7.78065	7.82466	8.11726	8.13679	-1.03098	1.22485	1.24154	0.5067	0.0004	0.0002	0.751946	0.00618953	0.00391485
SNOWBALL_007750_st	NAV3	8.54139	8.412	7.87229	7.64858	1.09383	-1.45369	-1.69752	0.2961	0.0004	< 0.001	0.576115	0.00628463	0.000412808
SNOWBALL_027029_st	NDUFAF2	3.96851	3.66705	4.21309	3.98023	1.23239	1.46007	1.24244	0.0244	0.0004	0.02	0.126277	0.00631545	0.110799
SNOWBALL_024060_s_st	RAB3GAP1	7.2336	7.36464	7.67142	7.80896	-1.09508	1.23694	1.36068	0.0726	0.0004	< 0.001	0.256272	0.00633305	0.000339736
SNOWBALL_001023_st	JUN	5.3721	5.68233	6.19075	6.09087	-1.2399	1.4225	1.32734	0.0144	0.0004	0.0023	0.0884684	0.00635369	0.0245297
SNOWBALL_009950_st	PRIM2	7.06389	6.72089	6.18969	5.64696	1.26839	-1.44513	-2.10517	0.0104	0.0004	< 0.001	0.070691	0.00637463	1.51509e-05
SNOWBALL_015173_st	ZNF385D	6.95028	6.89406	6.46667	6.42964	1.03974	-1.34479	-1.37976	0.5628	0.0004	0.0002	0.78934	0.00641076	0.00354288
SNOWBALL_030533_st	THAP6	4.14834	4.16518	4.52801	4.61636	-1.01174	1.28595	1.36716	0.8376	0.0004	< 0.001	0.934865	0.00643178	0.00125528
SNOWBALL_000019_st	SOD2	7.02508	6.99472	7.35181	7.29372	1.02127	1.28084	1.2303	0.7077	0.0004	0.0017	0.872667	0.00644542	0.0196712
SNOWBALL_021408_s_st	PSMB2	9.25488	9.14239	8.85469	8.78781	1.08109	-1.22069	-1.27862	0.0985	0.0004	< 0.001	0.308825	0.00646758	0.00135959
SNOWBALL_006831_st	EIF3L	9.48668	9.3702	9.16734	8.96665	1.08409	-1.15098	-1.32276	0.0203	0.0004	< 0.001	0.111689	0.00646978	1.82954e-05
SNOWBALL_047440_st	DDX5	5.42885	5.58398	5.21239	5.25412	-1.11352	-1.29378	-1.25689	0.0794	0.0004	0.0011	0.270789	0.00647288	0.0139562
SNOWBALL_012675_s_st	ORC5	5.30647	5.24339	5.51983	5.45103	1.0447	1.2112	1.1548	0.3212	0.0004	0.0039	0.600714	0.00647396	0.0356251
SNOWBALL_002445_st	LEO1	6.19667	6.1339	6.55819	6.66959	1.04447	1.34191	1.44963	0.5164	0.0004	< 0.001	0.758568	0.00648946	0.00111906
SNOWBALL_018612_st	OSMR	6.18251	6.23762	6.8033	6.69304	-1.03894	1.48009	1.37118	0.6686	0.0004	0.0024	0.851991	0.00657341	0.0249255
SNOWBALL_033198_st	CENPC	4.34945	4.2389	4.02996	3.94423	1.07964	-1.15584	-1.22661	0.0308	0.0004	< 0.001	0.148036	0.00658762	0.000449227
SNOWBALL_029078_st	IDS	7.8998	7.89142	8.22793	8.1975	1.00582	1.2627	1.23634	0.9128	0.0004	0.0009	0.966768	0.00659375	0.0122243
SNOWBALL_008204_st	FTO	5.87344	5.87415	6.21674	6.34891	-1.00049	1.26803	1.38968	0.9927	0.0004	< 0.001	0.997256	0.00666403	0.000529677
SNOWBALL_013296_st	ENAH	10.591	10.52	10.3382	10.3087	1.05048	-1.13428	-1.15774	0.1	0.0004	< 0.001	0.311693	0.00667248	0.00222347
SNOWBALL_008670_st	ZMYM4	6.7753	6.7512	7.05491	7.01072	1.01685	1.23432	1.19709	0.7276	0.0004	0.0015	0.882831	0.00667416	0.0179916
SNOWBALL_019400_st	SAMHD1	7.15165	7.11121	7.40269	7.54135	1.02843	1.2239	1.34737	0.5446	0.0004	< 0.001	0.777606	0.00672833	0.000310442
SNOWBALL_017861_st	SPC25	5.45305	5.05169	4.47091	4.03205	1.32074	-1.49566	-2.02742	0.0071	0.0004	< 0.001	0.0545546	0.00674747	6.38184e-05
SNOWBALL_000281_s_st	NFKBIZ	6.40834	6.45177	6.95951	6.88787	-1.03056	1.42182	1.35294	0.7082	0.0004	0.0015	0.872857	0.00680086	0.0177408
SNOWBALL_018147_st	BMPR2	9.24414	9.37084	9.64097	9.57695	-1.0918	1.20591	1.15357	0.0532	0.0004	0.0037	0.210661	0.00684051	0.0342289
SNOWBALL_000628_st	MPPED2	3.90037	4.02078	3.68379	3.64367	-1.08704	-1.26311	-1.29873	0.1314	0.0004	0.0001	0.366229	0.00684458	0.00305055
SNOWBALL_018703_s_st	SGCD	7.99397	8.10452	7.70575	7.44925	-1.07964	-1.31838	-1.57491	0.2357	0.0004	< 0.001	0.509897	0.00690598	0.000121653
SNOWBALL_013225_st	UBFD1	6.80204	6.93612	7.21611	7.42929	-1.09739	1.21418	1.40753	0.0493	0.0004	< 0.001	0.20083	0.00692506	6.4155e-05
SNOWBALL_023015_st	IGF1	7.77962	7.76275	7.18255	7.28088	1.01177	-1.49506	-1.39655	0.8988	0.0004	0.002	0.961061	0.0069321	0.0218715
SNOWBALL_047333_st	PDLIM7	8.32218	8.25419	8.02794	7.67376	1.04826	-1.16979	-1.49529	0.2008	0.0004	< 0.001	0.466583	0.00694625	1.70354e-06
SNOWBALL_034957_st		2.64462	2.82535	3.45561	3.75023	-1.13346	1.54784	1.89853	0.2213	0.0004	< 0.001	0.492362	0.00696102	0.000341581
SNOWBALL_033875_st	MIER3	4.94958	4.83118	5.36975	5.43961	1.08554	1.45253	1.5246	0.3441	0.0004	0.0001	0.621899	0.00700218	0.00291704
SNOWBALL_004600_st	CKAP2L	7.6378	7.33288	6.76147	6.00316	1.23535	-1.48598	-2.51354	0.031	0.0004	< 0.001	0.148701	0.0070445	4.49647e-06
SNOWBALL_020986_s_st	EBP	7.7249	7.82227	7.54562	7.10534	-1.06982	-1.21138	-1.64368	0.139	0.0004	< 0.001	0.378548	0.00712055	1.60841e-06
SNOWBALL_002526_st	MAPK6	8.38595	8.42088	8.61564	8.70266	-1.02451	1.14453	1.21569	0.4395	0.0004	< 0.001	0.702566	0.00716097	0.000400531
SNOWBALL_021503_st	PRPF3	7.97898	8.07516	8.44998	8.87573	-1.06894	1.29667	1.74178	0.2738	0.0004	< 0.001	0.552824	0.00720484	1.06031e-05
SNOWBALL_027931_st	ITGAV	6.10893	6.50819	7.07747	7.05362	-1.31883	1.48378	1.45946	0.0069	0.0004	0.0006	0.0534663	0.00722921	0.00959062
SNOWBALL_004599_st	ECM2	2.71121	3.16286	3.83296	3.88323	-1.36761	1.59119	1.6476	0.009	0.0004	0.0002	0.0639796	0.00726368	0.00439127
SNOWBALL_004053_st		6.08363	6.11867	6.55463	6.60659	-1.02459	1.35281	1.40242	0.7277	0.0004	0.0001	0.882853	0.00728214	0.00326727
SNOWBALL_017396_s_st	LOC110256851	8.4433	8.56956	8.9119	8.86742	-1.09146	1.26781	1.22931	0.1236	0.0004	0.0015	0.353241	0.00729127	0.0175141
SNOWBALL_037875_st	SBNO2	5.42506	5.50735	5.88091	5.81373	-1.0587	1.29555	1.23661	0.3474	0.0005	0.0024	0.624987	0.00744292	0.0249207
SNOWBALL_028227_st	KLHL9	6.02636	6.20454	6.49099	6.50769	-1.13146	1.21963	1.23383	0.0147	0.0005	0.0003	0.089945	0.00745865	0.00504712
SNOWBALL_013068_st	TOR1AIP2,LOC100738642	6.84997	7.02602	7.44897	7.47985	-1.12978	1.34068	1.36968	0.0867	0.0005	0.0002	0.285674	0.00754235	0.004629
SNOWBALL_012838_st	DMTF1	5.66069	5.83706	6.23165	6.26723	-1.13003	1.31457	1.3474	0.0676	0.0005	0.0002	0.245335	0.00754364	0.00412444
SNOWBALL_015308_st	ZNF660	2.55096	2.60952	3.19732	2.98972	-1.04142	1.50295	1.30152	0.6681	0.0005	0.0119	0.851703	0.00755977	0.0778378
SNOWBALL_011269_st	NSD2	6.31494	6.15034	5.82807	5.80968	1.12086	-1.25029	-1.26633	0.0397	0.0005	0.0003	0.174754	0.00756103	0.00516209
SNOWBALL_006367_st	PSMB4	8.81555	8.80506	8.59529	8.50213	1.00729	-1.15651	-1.23365	0.8296	0.0005	< 0.001	0.931357	0.00762654	0.000441802
SNOWBALL_033152_st	NEDD4	5.47324	5.54211	6.01733	6.00234	-1.04889	1.39013	1.37576	0.5352	0.0005	0.0006	0.771448	0.00769183	0.00950361
SNOWBALL_043492_st		4.15731	3.97734	3.52643	3.4348	1.13286	-1.3669	-1.45654	0.1007	0.0005	< 0.001	0.312859	0.00778232	0.00203558
SNOWBALL_028004_st	TRAK2	4.4705	4.65239	5.02437	5.08493	-1.13437	1.29413	1.3496	0.0486	0.0005	0.0001	0.199192	0.00778607	0.00264586
SNOWBALL_000752_st	EFR3A	8.25072	8.4785	8.79937	8.80163	-1.17104	1.24908	1.25104	0.007	0.0005	0.0005	0.0535589	0.00786384	0.00750025
SNOWBALL_002648_st	ME2	6.73972	6.83337	7.06481	7.07671	-1.06707	1.17401	1.18373	0.0969	0.0005	0.0003	0.305906	0.00787212	0.00558417
SNOWBALL_023889_st	NABP1	5.72195	5.5355	5.97849	6.42637	1.13796	1.35942	1.8543	0.0853	0.0005	< 0.001	0.283058	0.00787711	2.17546e-05
SNOWBALL_003997_st	ODF2	8.78014	8.63586	8.34318	8.08982	1.10518	-1.22492	-1.46008	0.0475	0.0005	< 0.001	0.1961	0.00791033	4.4934e-05
SNOWBALL_009559_st	RANBP9	8.17458	8.16581	8.31218	8.35461	1.0061	1.10678	1.13982	0.7977	0.0005	< 0.001	0.916759	0.00794792	0.00120364
SNOWBALL_034005_st	HNRNPL	7.56539	7.35791	6.97421	6.86742	1.15466	-1.30468	-1.40492	0.0318	0.0005	< 0.001	0.151094	0.0079663	0.00129943
SNOWBALL_028098_st	CGGBP1	6.00347	6.3067	6.87563	6.95944	-1.2339	1.48342	1.57216	0.034	0.0005	0.0001	0.157973	0.00796777	0.00300238
SNOWBALL_008376_st	MED25	5.46327	5.30683	5.07052	5.04637	1.11453	-1.17798	-1.19787	0.0111	0.0005	0.0002	0.0738597	0.00809314	0.00411399
SNOWBALL_034531_st	SCARB2	6.2311	6.54877	7.04367	7.26544	-1.24632	1.40922	1.64338	0.0133	0.0005	< 0.001	0.0840052	0.00816524	0.000472376
SNOWBALL_013053_st	RALGPS2	5.61483	5.94957	6.56942	6.34512	-1.26115	1.53672	1.31545	0.0327	0.0005	0.0138	0.153849	0.00820015	0.0861494
SNOWBALL_023306_s_st	ERO1A	7.24306	7.37371	7.88799	7.69611	-1.09478	1.42828	1.2504	0.2876	0.0005	0.0153	0.567348	0.00820103	0.0922096
SNOWBALL_004872_st	ZNF200	3.88882	3.77604	4.31846	3.88923	1.08132	1.45642	1.08162	0.3813	0.0005	0.3797	0.654928	0.00821074	0.653553
SNOWBALL_040530_st	SCD	3.07075	2.98161	3.68788	3.64991	1.06374	1.63158	1.5892	0.5924	0.0005	0.0008	0.807814	0.0082194	0.0117411
SNOWBALL_043088_st	MARF1	8.13647	8.25165	8.50071	8.55834	-1.08311	1.18843	1.23687	0.0626	0.0005	< 0.001	0.233615	0.00822775	0.00181739
SNOWBALL_007179_st	EMP1	9.4878	9.40878	9.05514	8.71287	1.0563	-1.27778	-1.61991	0.3479	0.0005	< 0.001	0.625463	0.00823254	2.87862e-05
SNOWBALL_020101_st	TIMP1	11.8102	11.5987	11.1457	10.7499	1.15787	-1.36888	-1.80104	0.0605	0.0005	< 0.001	0.228549	0.00824487	4.58961e-05
SNOWBALL_013473_st	LOC100524391	4.36479	4.50179	4.14684	4.21605	-1.09962	-1.27894	-1.21904	0.1145	0.0005	0.0031	0.33799	0.00828278	0.0300446
SNOWBALL_009150_st	PRDX1	9.92885	9.89735	9.72499	9.61982	1.02208	-1.1269	-1.21212	0.4415	0.0005	< 0.001	0.704227	0.00836376	0.00019095
SNOWBALL_023050_st	SGCD	8.19829	8.24987	7.92308	7.72939	-1.0364	-1.25422	-1.43444	0.5055	0.0005	< 0.001	0.751034	0.00839644	0.000212028
SNOWBALL_031115_st	AMOTL1	8.64081	8.7995	9.099	9.3451	-1.11627	1.23072	1.45963	0.0364	0.0005	< 0.001	0.165106	0.00846852	6.20334e-05
SNOWBALL_027448_st	DIRC2	5.46683	5.75522	6.567	6.67926	-1.22128	1.75537	1.89742	0.1452	0.0005	0.0002	0.388272	0.00847203	0.00341089
SNOWBALL_007578_s_st	IGF1	9.61079	9.50903	9.02665	9.08058	1.07308	-1.39705	-1.34579	0.3773	0.0005	0.0015	0.651616	0.00854133	0.0178101
SNOWBALL_021242_s_st	BIRC5	6.6479	6.35127	5.78716	5.12472	1.22827	-1.47848	-2.34007	0.0379	0.0005	< 0.001	0.16971	0.00856902	1.1513e-05
[truncated: 2,270 more rows]

## Sheet: Table S2
Table S2: Enriched gene ontology (GO) terms and Enriched Kyoto Encyclopaedia of Genes and Genomes (KEGG) pathways assigned to myoblasts after 72 h of proliferation permanently cultured at 35°, 39° or 41°C compared to 37°C.
Temperature	Gene Set	Description	Size	p Value	Genes
35°C vs. 37°C	GO:0048285	organelle fission	20	< 0.001	EREG, IL1A, LIF, KIF11, CCNB1, CDC20, TOP2A, KIF20B, SMC4, CAV2, PTTG1
35°C vs. 37°C	GO:0006955	immune response	21	< 0.001	EREG, IL1A, LIF, CTSC, ARG2, CCL2, LGR4, NLRP3, NFKBIA
35°C vs. 37°C	GO:0007049	cell cycle	48	< 0.001	EREG, IL1A, LIF, TXNIP, CCL2, CCNB2, KIF11, CCNB1, SFRP1, CDC20, TOP2A, CDK1, KIF20B, BRCA1, HAUS1, SMC4, CAV2, PTTG1, APBB2, TNFAIP3
35°C vs. 37°C	GO:006396	RNA processing	30	< 0.001	SRSF2, CLK1, RBM3, POP1, WBP11, SRSF1, MBNL1, RBMX, LSM6, RNPS1, PRDX6, SF3B4, HNRNPA1, SNRPD1, SF3A3, SEPHS2, NOP2, NOL11, EFTUD2, POP5, AFF2, SSB, PPP1R8, PRPF40A, SF3A1, STRAP, RBM8A
35°C vs. 37°C	GO:0051276	chromosome organization	34	0.0015315	MYOCD, LIF, CCNB1, CDC20, TOP2A, CDK1, BRCA1, SMC4, PTTG1, CENPK, CENPI, PRDM12, USP16, MAPK8, GNL3, RAD21, LOC100156427, HNRNPA1, ANAPC5, PTMA, POT1, SMC3, CCT3, SMARCA5, PTGES3, STAG2, SMC6, CCT2, CTNNB1, KPNB1, CHD8
35°C vs. 37°C	GO:0002682	regulation of immune system process	24	0.0018315	EREG, LIF, ARG2, CCL2, LGR4, IGFBP2, NLRP3, NFKBIA, SFRP1
35°C vs. 37°C	GO:0043900	regulation of multi-organism porcess	13	< 0.001	ARG2, CCNB2, CCNB1, CDC20, TOP2A, CDK1, CAV2, TNFAIP3, TRAF3
35°C vs. 37°C	GO:0003723	RNA binding	39	0.0018382	MYOCD, IL1A, LIF, ARG2, LGR4, SLITRK2, NLRP3, SRPX2, SFRP1, CDC20, CDK1, KIF20B, BRCA1
35°C vs. 37°C	ssc04668	TNF signaling pathway	17	< 0.001	PTGS2, LIF, CCL2, NFKBIA, CREB5, CASP3, CASP10, TNFAIP3, TRAF3, BIRC3, NFKB1, MAP3K8, MAPK8
35°C vs. 37°C	ssc03030	DNA replication	10	0.0018484	MCM2, MCM7, PCNA, MCM4, MCM6, RFC5, RFC4, DNA2, RNASEH2B, RPA1
35°C vs. 37°C	ssc04110	Cell cycle	28	< 0.001	MCM2, MCM7, PLK1, CCNB2, CCNB1, PCNA, CCNB3, MCM4, CDC20, CDK1, MCM6, RBL1, PTTG1, SMC1A
35°C vs. 37°C	ssc04657	IL-17 signaling pathway	13	0.0018727	PTGS2, CCL2, NFKBIA, CASP3, TNFAIP3, SRSF1, TRAF3, NFKB1, S100A8, MAPK8
35°C vs. 37°C	ssc04060	Cytokine-cytokine receptor interaction	12	0.005814	IL1A, LIF, IL11, CCL2, IL1R1
39°C vs. 37°C	GO:0048285	organelle fission	20	< 0.001	EREG, IL1A, LIF, UBE2C, KIF11, PTTG1, KIF20B, TOP2A, BIRC5, CCNB1, CDC20, CDC25B
39°C vs. 37°C	GO:0005694	chromosome	28	< 0.001	CENPO, LOC100158121, TOP2A, LOC100156127, H2AFZ, BRCA1, BIRC5, CCNB1, OIP5, HMGN4, RFC5, SALL1, LOC100158117
39°C vs. 37°C	GO:0044815	DNA packaging complex	5	< 0.001	LOC100158121, LOC100156127, H2AFZ, LOC100158117, SMC4
39°C vs. 37°C	GO:1990904	ribonucleoprotein complex	27	0.0019194	RBM3, TOP2A, BRCA1, TRA2B, CARHSP1, U2AF2, HNRNPA1, DENR, LSM3, SNRPF, RPS6, SNRNP40, MBNL1, RBM8A, RPSA, RPL3, DHX29, WAC, SF3A1, UTP20, RPL23, ACTB, EIF4H
39°C vs. 37°C	GO:0031982	vesicle	42	< 0.001	RHCG, RUSC2, DDIT3, APPL2, CLU, TMEM59, SCARB2, GPNMB, SSPN, SNX16, FYN, PIK3C3, CTSH, ATM, AFTPH, PLD1, ARHGEF2, SPAST, ANPEP, TFRC, NPC1, SLC30A7, CTSB, TM9SF4, STX7, OPTN, SNX6, APP, LEPROT, RNF13, HSP90AA1, SPG21, MYO1E, RAB14
39°C vs. 37°C	GO:0007049	cell cycle	58	0.0058594	EREG, CDK1, IL1A, LIF, UBE2C, KIF11, CCNB2, PTTG1, KIF20B, TOP2A, CEP152, BRCA1, BIRC5, CDKN3, CCNB1, CDC20, CDC25B, CKS2, APBB2
39°C vs. 37°C	GO:0070851	growth factor receptor binding	5	< 0.001	EREG, AREG, IL1A
39°C vs. 37°C	GO:0051276	chromosome organization	34	< 0.001	CDK1, CENPO, LIF, PTTG1, TOP2A, MYOCD, LOC100156127, BRCA1, BIRC5, CENPK, CCNB1, CDC20, OIP5, LOC100158117, LMNA, SMC4, HNRNPA1
39°C vs. 37°C	GO:0071824	protein-DNA complex subunit organization	9	0.0018904	CENPO, LOC100156127, CENPK, OIP5, LOC100158117, PTMA, HEY2, ATF7IP, RPL23
39°C vs. 37°C	GO:0005794	Golgi apparatus	28	0.011583	POSTN, TMEM59, PLAGL1, MAN1A1, BCL6, RSC1A1, TPST1, SLC35A1, MANEA, AFTPH, PLD1, ARHGEF2, GLIPR2, SLC30A7, TM9SF4, OPTN, GALNT1, APP, LEPROT, GNAI3, RAB14, GANAB, PSENEN, PRNP, TNKS
39°C vs. 37°C	ssc03030	DNA replication	10	< 0.001	MCM7, PCNA, PRIM2, RFC5, DNA2, MCM4, RFC2, MCM6, RFC4
41°C vs. 37°C	GO:0048285	organelle fission	27	< 0.001	IL1A, PTTG1, KIF11, TOP2A, EREG, CCNB1, UBE2C, CDC20, LIF, BIRC5, KIF20B, SMC4
41°C vs. 37°C	GO:0030545	receptor regulator activity	19	< 0.001	AREG, IL1A, SST, LIF, CD70, PTHLH, CCL2, TIMP1, BMP4, TGFB1
41°C vs. 37°C	GO:0044815	DNA packaging complex	7	< 0.001	LOC100158121, H2AFZ, LOC100156127, SMC4, LOC100156932, LOC100158117
41°C vs. 37°C	GO:0010469	regulation of signaling receptor activity	20	< 0.001	AREG, IL1A, SST, LIF, CD70, PTHLH, CCL2, TIMP1, BMP4, TGFB1, CACNG7
41°C vs. 37°C	GO:0007049	cell cycle	88	< 0.001	IL1A, PTTG1, CDK1, KIF11, TOP2A, CCNB2, EREG, CCNB1, UBE2C, CDC20, LIF, BIRC5, KIF20B, BRCA1, CEP152, CKS2, CCL2, SMC4, CDKN3
41°C vs. 37°C	GO:0051301	cell division	22	< 0.001	IL1A, CDK1, TOP2A, CDC20, BIRC5, KIF20B, CKS2, CDC25B, ENSA, SKA1, TGFB1
41°C vs. 37°C	GO:0070851	growth factor receptor binding	6	< 0.001	AREG, IL1A, EREG
41°C vs. 37°C	GO:0005856	cytoskeleton	88	0.0014085	DLGAP5, CDK1, KIF11, TOP2A, MYOM1, CCNB2, CCNB1, CDC20, BIRC5, KIF20B, HMMR, CEP152, DMD, AAAS, CDC45, LMNA, CTSC, SLC25A5, CDC25B, AMOT
41°C vs. 37°C	GO:0033043	regulation of organelle organization	71	0	IL1A, PTTG1, KIF11, TOP2A, EREG, CCNB1, UBE2C, CDC20, LIF, BIRC5, KIF20B, MYOCD, BRCA1, LMNA, ARHGDIB, SLC25A5, BMP4, MET, PARP3, MLST8, HNRNPA1, CAV2, CAPG, VPS11, RAD21, PHB2, LIG4, IL1RAP, NRP1, MLLT11, ROCK1
41°C vs. 37°C	GO:0005694	chromosome	51	0.0044843	TOP2A, CCNB1, LOC100158121, BIRC5, CENPO, H2AFZ, BRCA1, LOC100156127, SMC4, OIP5, HMGN4, LOC100156932, RFC5, CENPI, RFC4, SALL1, LOC100158117, PARP3, RAD21, HEY2, MAGED1, LIG4
41°C vs. 37°C	GO:0019900	kinase binding	37	< 0.001	KIF11, TOP2A, MYOM1, CCNB1, ATP1B1, CAV1, CEP152, CKS2, CDC25B, DPYSL2, TNFAIP3, CAV2, NRP1, TRAF3, PRKAR1A, NSF, MSN, SHC1, CTNNB1, ILK, DAZAP2, IGBP1, ACTB, PRMT1, RPS6, CLTC, AP1B1, PRKAR2A, YWHAZ, PTPN11, RAC1
41°C vs. 37°C	GO:0051276	chromosome organization	60	< 0.001	PTTG1, CDK1, TOP2A, CCNB1, CDC20, LIF, BIRC5, CENPO, CENPK, MYOCD, BRCA1, LOC100156127, SMC4, OIP5, LMNA
41°C vs. 37°C	GO:0007059	chromosome segregation	24	< 0.001	PTTG1, TOP2A, CCNB1, CDC20, BIRC5, BRCA1, SMC4, OIP5
41°C vs. 37°C	GO:0014070	response to organic cyclic compound	30	0.0015723	AREG, NR4A2, H2AFZ, KLF9, BRCA1, CCL2, NFKBIA, SFRP1, BMP4, PTGFR, TGFB1, P2RX7, CCDC62, DDRGK1, PHB2
41°C vs. 37°C	GO:0000003	reproduction	61	0	AREG, IL1A, PTTG1, CDK1, TOP2A, CCNB2, CCNB1, CDC20, LIF, SMC4, AAAS, AWN, ARHGDIB, CDC25B, SALL1, SFRP1, BMP4, ACSL4
41°C vs. 37°C	GO:0033993	response to lipid	40	0.0046802	AREG, NR4A2, H2AFZ, KLF9, BRCA1, CCL2, NLRP3, NFKBIA, SCARB1, SFRP1, BMP4, TNFAIP3, PTGFR, TGFB1, P2RX7, PLAA, CCDC62, DDRGK1, PHB2
41°C vs. 37°C	ssc03030	DNA replication	13	< 0.001	PRIM2, MCM7, PCNA, MCM4, RFC5, MCM2, RFC4, DNA2, RNASEH2B, RFC2, RPA1, MCM6
41°C vs. 37°C	ssc04110	Cell cycle	38	< 0.001	CCNB3, PTTG1, CDK1, PLK1, CCNB2, CCNB1, BUB1, CDC20, MCM7, CDC45, PCNA, MCM4, CDC25B, MCM2, SMC1A, DBF4, TGFB1
41°C vs. 37°C	ssc00240	Pyrimidine metabolism	11	0.0017953	RRM2, PRIM2, NME7, DCK, RRM1, TYMS, POLR2F, UPP1, UCK2

## Sheet: Table S3
Table S3: Least square mean (LSM), Fold change, P value and adjusted P (FDR) of all differentially expressed genes of myoblasts from pool 5 compared to pool 20 after 72 h of proliferation permanently cultured at 35°, 37°, 39° and 41°C.
Probeset	anno name local	LSM P5	LSM P20	Fold change	P value P20 P5	FDR P20 P5
SNOWBALL_017945_s_st	CHRNA1	7.7715	6.62579	-2.21255	< 0.001	1.41182e-07
SNOWBALL_018184_s_st	TTN	5.40521	4.34583	-2.08404	< 0.001	3.54783e-07
SNOWBALL_023908_st	TTN	5.88155	4.81897	-2.08867	< 0.001	6.66716e-07
SNOWBALL_000042_s_st	ACTC1	9.48664	8.54706	-1.91796	< 0.001	1.62947e-06
SNOWBALL_003265_s_st	ACTC1	7.52815	6.64817	-1.84036	< 0.001	1.99615e-06
SNOWBALL_000048_s_st	ACTC1	10.1197	9.11141	-2.01149	< 0.001	2.27548e-06
SNOWBALL_014981_st	MYH2	5.19447	4.44862	-1.67696	< 0.001	8.79933e-06
SNOWBALL_035615_st	EPDR1	6.73342	7.3536	1.53707	< 0.001	1.53391e-05
SNOWBALL_018012_st	TTN	5.41289	4.60161	-1.75476	< 0.001	2.05662e-05
SNOWBALL_024708_s_st	LAS1L	8.46046	8.73429	1.20901	< 0.001	3.3755e-05
SNOWBALL_022238_st		7.34364	6.84362	-1.41423	< 0.001	3.78682e-05
SNOWBALL_037015_st	WISP1	7.01929	6.43842	-1.49575	< 0.001	7.76893e-05
SNOWBALL_022986_s_st	SFRP4	9.34072	9.97059	1.54743	< 0.001	8.07527e-05
SNOWBALL_043940_st	MRPL42	4.9471	5.9339	1.98179	< 0.001	0.000151595
SNOWBALL_023946_s_st	KLHL41	4.14442	3.44914	-1.61919	< 0.001	0.000164587
SNOWBALL_023056_s_st	SFRP4	7.47255	8.20471	1.66112	< 0.001	0.000255591
SNOWBALL_023217_st	FABP4	4.47267	3.79279	-1.60201	< 0.001	0.000395236
SNOWBALL_035365_st	IL1RAP	8.31264	8.71217	1.31908	< 0.001	0.000409349
SNOWBALL_011710_s_st	SPP1	10.1176	9.64217	-1.39033	< 0.001	0.000428214
SNOWBALL_025403_st	SGK1	6.38514	7.04223	1.5769	< 0.001	0.000433787
SNOWBALL_038445_st	NES	6.18307	5.84075	-1.2678	< 0.001	0.000519704
SNOWBALL_018060_s_st	SERPINE2	9.70474	9.90684	1.15038	< 0.001	0.000578547
SNOWBALL_000272_s_st	CD86	8.86806	9.22825	1.28359	< 0.001	0.000579913
SNOWBALL_005569_st	WISP1	8.64518	8.11135	-1.44776	< 0.001	0.000619585
SNOWBALL_005700_st	FABP5	6.85618	6.36016	-1.41032	< 0.001	0.00063706
SNOWBALL_004866_st	ASPN	9.77204	9.08025	-1.61529	< 0.001	0.000666525
SNOWBALL_011826_st	MYOZ2	2.70179	2.08744	-1.53087	< 0.001	0.000692396
SNOWBALL_015142_st	TEX14	5.69313	6.73432	2.05792	< 0.001	0.000752534
SNOWBALL_018170_s_st	MYL1	6.3204	5.96343	-1.28074	< 0.001	0.000752939
SNOWBALL_011795_st	MYOZ2	6.05978	5.20364	-1.81019	< 0.001	0.000785591
SNOWBALL_036143_st	IL1RAP	6.84948	7.38265	1.44711	< 0.001	0.000881706
SNOWBALL_031619_st	LOC110258845	5.18694	5.63026	1.35973	< 0.001	0.000903107
SNOWBALL_011465_st	SFRP2	10.4694	10.9149	1.36186	< 0.001	0.00090448
SNOWBALL_020255_st	LAS1L	6.97157	7.26197	1.22299	< 0.001	0.00096587
SNOWBALL_017737_st	TENM3	6.44033	6.77508	1.26117	< 0.001	0.000994394
SNOWBALL_004580_st	TPST1	7.41882	7.09171	-1.2545	< 0.001	0.0010014
SNOWBALL_028094_st	IL1RAP	7.65542	8.14627	1.40527	< 0.001	0.00117897
SNOWBALL_022983_st	CD82	6.33104	5.74021	-1.50611	< 0.001	0.00118224
SNOWBALL_046425_st	ZNHIT6	7.74075	8.14913	1.3272	< 0.001	0.00119736
SNOWBALL_016326_st	PTK2B	5.4302	5.887	1.37249	< 0.001	0.00119966
SNOWBALL_020973_s_st	IGFBP2	9.34486	9.77793	1.35011	< 0.001	0.00123214
SNOWBALL_033568_st	SEMA3C	4.85906	5.34121	1.39682	< 0.001	0.00126316
SNOWBALL_020326_st	SPIN3	4.013	4.51105	1.41231	< 0.001	0.0013645
SNOWBALL_029736_st	NRP2	9.00821	9.20974	1.14992	< 0.001	0.00137703
SNOWBALL_028505_st	CA12	6.27537	6.00767	-1.20389	< 0.001	0.00144379
SNOWBALL_020743_s_st	ACSL4	8.81701	9.05637	1.18047	< 0.001	0.00144419
SNOWBALL_000787_st	NOV	7.972	7.30232	-1.59072	< 0.001	0.00146215
SNOWBALL_031772_st		11.8119	12.0717	1.19729	< 0.001	0.00152992
SNOWBALL_016936_s_st	ARID5B	9.60976	9.79018	1.13321	< 0.001	0.00155394
SNOWBALL_005581_st	WISP1	8.19623	7.82474	-1.29368	< 0.001	0.00158475
SNOWBALL_007170_st	LPCAT3	8.82597	8.65167	-1.12842	< 0.001	0.00164466
SNOWBALL_025003_s_st	CHST15	6.09364	5.76215	-1.25831	< 0.001	0.00167372
SNOWBALL_035820_st	ADORA2B	4.51756	4.92248	1.32401	< 0.001	0.00173826
SNOWBALL_024499_s_st	ARID5B	9.33938	9.51688	1.13093	< 0.001	0.00174728
SNOWBALL_039248_st	IGFBP2	4.21817	4.80554	1.50251	< 0.001	0.00185692
SNOWBALL_018811_st	ADAM19	7.45953	7.7542	1.22661	< 0.001	0.0019157
SNOWBALL_047382_st		11.1567	11.4394	1.21652	< 0.001	0.00199267
SNOWBALL_005712_st	ZFHX4	7.96623	8.18017	1.15985	< 0.001	0.00207598
SNOWBALL_006848_st	TIMP3	9.18689	9.50747	1.24883	< 0.001	0.00209808
SNOWBALL_016912_s_st	CYP2C91	5.26954	5.70931	1.35639	< 0.001	0.00214842
SNOWBALL_030132_st	ADAM19	8.82492	9.15198	1.25445	< 0.001	0.00214872
SNOWBALL_000123_s_st	PECAM1	4.96098	4.34492	-1.53268	< 0.001	0.0023192
SNOWBALL_008940_st	EPS15	9.10202	9.23758	1.09852	< 0.001	0.00239456
SNOWBALL_031725_st	MIB1	7.23641	7.10328	-1.09667	0.0001	0.00252427
SNOWBALL_024029_s_st	COL6A3	8.77618	8.44153	-1.26107	0.0001	0.00263778
SNOWBALL_031138_st	LTBP2	8.17901	8.49453	1.24447	0.0001	0.00276368
SNOWBALL_019717_st	CHCHD3	7.71706	7.57458	-1.1038	0.0001	0.00279203
SNOWBALL_034490_st		6.13827	6.36982	1.17409	0.0001	0.00288991
SNOWBALL_047841_st	PKDCC	3.21213	3.56749	1.27931	0.0001	0.00295939
SNOWBALL_004795_st	OMD	6.14695	5.58082	-1.48055	0.0001	0.00298133
SNOWBALL_016555_st	LIF	5.98226	6.36371	1.30266	0.0001	0.00307492
SNOWBALL_010447_st	AREL1	7.84437	8.03626	1.14226	0.0001	0.00317274
SNOWBALL_001544_st	SPP1	9.40767	8.88151	-1.44009	0.0001	0.00319087
SNOWBALL_013839_st	SUCLA2	8.07184	8.24115	1.12452	0.0002	0.00327506
SNOWBALL_018981_st	MTUS1	5.0892	4.73106	-1.28178	0.0002	0.00330108
SNOWBALL_023050_st	SGCD	8.15698	7.89333	-1.20051	0.0002	0.00331872
SNOWBALL_032522_st	MAGI1	4.77149	5.20009	1.34593	0.0002	0.00332263
SNOWBALL_000025_st	SMPDL3A	6.91515	6.63498	-1.21434	0.0002	0.00347726
SNOWBALL_000867_st	S100A4	8.07182	7.51552	-1.47049	0.0002	0.00360464
SNOWBALL_042614_st	KLF12	8.02917	8.15473	1.09093	0.0002	0.00368972
SNOWBALL_008635_st	TXNDC12	8.43943	8.72581	1.21958	0.0002	0.00416384
SNOWBALL_037791_s_st	IL1RAP	7.39715	7.78846	1.31159	0.0002	0.00416736
SNOWBALL_027290_st	ENDOD1	5.32739	5.00723	-1.24847	0.0002	0.00425091
SNOWBALL_007651_st	NTN4	6.34016	6.01258	-1.25491	0.0002	0.00427683
SNOWBALL_013235_st	KCTD3	8.08219	8.24343	1.11825	0.0002	0.0043496
SNOWBALL_008723_st	DSC2	5.8061	5.50247	-1.23425	0.0002	0.00447132
SNOWBALL_004536_st	XPO6	8.46603	8.60159	1.09852	0.0002	0.00459877
SNOWBALL_045635_st	DCAF7	7.79216	7.37524	-1.33507	0.0002	0.00462011
SNOWBALL_023510_s_st		8.15993	8.44068	1.21482	0.0002	0.00464038
SNOWBALL_006295_st	EVI5	7.45606	7.5829	1.09189	0.0003	0.00480953
SNOWBALL_016968_s_st	ACSL5	6.81981	7.02778	1.15506	0.0003	0.00482711
SNOWBALL_024666_s_st	ANXA8	10.1449	9.85902	-1.21915	0.0003	0.004851
SNOWBALL_011685_st	EMCN	3.95808	3.10236	-1.80967	0.0003	0.00488736
SNOWBALL_021835_st	RHNO1	4.064	4.49961	1.35249	0.0003	0.00488991
SNOWBALL_011471_s_st	TMEM165	9.10471	9.27143	1.1225	0.0003	0.00489165
SNOWBALL_040363_st	PLCXD2	4.52681	5.07151	1.45872	0.0003	0.00506787
SNOWBALL_022524_st	FABP4	4.28565	3.69699	-1.50385	0.0003	0.00524822
SNOWBALL_012790_st	SEMA3C	9.59697	9.80124	1.15211	0.0003	0.00535505
SNOWBALL_035936_st	LOC100519166	5.07109	5.52469	1.36946	0.0003	0.00540449
SNOWBALL_007892_st	CDH13	6.38158	5.84757	-1.44795	0.0003	0.00542161
SNOWBALL_021470_s_st	SMAP2	9.624	9.91165	1.22065	0.0003	0.00544016
SNOWBALL_014097_st	GPC6	7.61048	7.84908	1.17985	0.0003	0.00549245
SNOWBALL_025136_s_st	GPC6	5.45774	5.67733	1.1644	0.0003	0.00551086
SNOWBALL_012757_st	EPDR1	7.2391	7.51352	1.20951	0.0003	0.00561612
SNOWBALL_018676_st	PLPP1,SLC38A9	9.65026	9.85407	1.15174	0.0003	0.00566422
SNOWBALL_014260_st	TTYH2	7.57582	7.36436	-1.15787	0.0003	0.0058444
SNOWBALL_010439_st	LTBP2	3.54883	4.20595	1.57692	0.0003	0.00584509
SNOWBALL_004241_st	PDGFA	6.47646	6.32364	-1.11175	0.0003	0.00599712
SNOWBALL_031115_st	AMOTL1	8.85971	9.08249	1.16698	0.0003	0.00601022
SNOWBALL_002190_st	ADGRG6	7.99544	8.298	1.23333	0.0003	0.00602601
SNOWBALL_021036_s_st	SLC30A1	6.78822	6.9519	1.12014	0.0003	0.00613924
SNOWBALL_047457_st	CREBZF	5.28605	5.56127	1.21018	0.0004	0.00617921
SNOWBALL_017899_st	DLX2	6.17164	6.61525	1.36	0.0004	0.00626128
SNOWBALL_000773_s_st	TATDN1	6.35936	6.70272	1.26871	0.0004	0.00638037
SNOWBALL_034859_st	PHTF2	3.93453	4.46351	1.44291	0.0004	0.00642499
SNOWBALL_016198_st	SST	5.12614	5.71516	1.50422	0.0004	0.00647083
SNOWBALL_005732_st	EYA1	6.03709	5.66794	-1.29159	0.0004	0.00660267
SNOWBALL_041575_st	LMO7	5.90198	6.17567	1.20889	0.0004	0.00662372
SNOWBALL_010980_st	CUNH14orf2	7.55006	7.31321	-1.17841	0.0004	0.00663425
SNOWBALL_020575_s_st	FHL1	7.96522	8.15521	1.14075	0.0004	0.00664463
SNOWBALL_023817_s_st	FERMT1	6.04025	6.60198	1.47603	0.0004	0.00672112
SNOWBALL_004986_st	LOXL3	6.35945	6.62235	1.19989	0.0004	0.00674409
SNOWBALL_019057_s_st	CST3	8.53651	8.7765	1.18098	0.0004	0.00699813
SNOWBALL_022356_st	FGD5	2.90611	2.569	-1.26323	0.0004	0.00706746
SNOWBALL_035682_st		10.638	10.9474	1.23918	0.0004	0.00726427
SNOWBALL_043349_st	COLEC12	8.13126	8.42496	1.22578	0.0004	0.00727428
SNOWBALL_018494_st	ACKR3	8.83186	8.52735	-1.235	0.0005	0.00752923
SNOWBALL_040591_st	SCARA3	10.1718	10.0323	-1.10154	0.0005	0.00783664
SNOWBALL_002508_st	PREP	7.65119	7.50214	-1.10884	0.0005	0.00802557
SNOWBALL_005391_st	PKDCC	7.09245	7.40903	1.24538	0.0005	0.00809998
SNOWBALL_004473_st	CRYM	3.39487	3.95377	1.47315	0.0005	0.00810813
SNOWBALL_036837_st	WISP1	5.92107	5.47259	-1.3646	0.0005	0.00815594
SNOWBALL_020315_st	LOC110257849	7.43818	7.74469	1.23671	0.0005	0.00834333
SNOWBALL_032659_st	FOXP1	8.93577	9.07556	1.10175	0.0005	0.00835255
SNOWBALL_016337_st	CLU	10.8517	10.6677	-1.13609	0.0005	0.00856976
SNOWBALL_000040_s_st	ACTC1	5.30213	4.75134	-1.46488	0.0005	0.00858416
SNOWBALL_033160_st	UST	8.13379	8.40598	1.20764	0.0006	0.00883659
SNOWBALL_036111_st	TRMT13	3.52296	3.97659	1.36948	0.0006	0.00884083
SNOWBALL_021556_s_st	ADGRG6	6.20156	6.61601	1.33279	0.0006	0.0089872
SNOWBALL_013551_st	ARHGAP21	8.68082	8.84434	1.12002	0.0006	0.00902953
SNOWBALL_039917_st	LOC110260801	3.72861	3.96532	1.1783	0.0006	0.00916376
SNOWBALL_037576_st		5.80918	5.58702	-1.16648	0.0006	0.00917756
SNOWBALL_035587_st	CRIM1	6.6806	6.97666	1.22778	0.0006	0.00937032
SNOWBALL_010796_st	ABHD2	8.47992	8.6286	1.10855	0.0007	0.00975182
SNOWBALL_034219_st	ADGRG6	6.74258	7.07685	1.26074	0.0007	0.00981334
SNOWBALL_010919_s_st	PGF	5.72907	5.37227	-1.28059	0.0007	0.0101755
SNOWBALL_004583_st	LOC100739121	3.21228	3.76709	1.46898	0.0007	0.0102067
SNOWBALL_002753_st	RHOJ	7.05568	6.75391	-1.23265	0.0007	0.0102147
SNOWBALL_028141_st	MANEA	4.42693	4.68067	1.19229	0.0007	0.0102585
SNOWBALL_013411_s_st	UBAP1	8.14916	8.27393	1.09034	0.0007	0.0103415
SNOWBALL_017783_st	TENM3	6.20812	6.5204	1.24166	0.0007	0.0104233
SNOWBALL_047417_st	CCDC112	5.58852	6.11726	1.44268	0.0008	0.0109376
SNOWBALL_011901_st	ANTXR2	8.94534	9.12584	1.13328	0.0008	0.0109864
SNOWBALL_015831_s_st	LOC110259753,LOC100626360	8.75474	8.88791	1.0967	0.0008	0.0110014
SNOWBALL_037822_st		2.39756	2.7901	1.3127	0.0008	0.0111607
SNOWBALL_002151_st	UST	8.08208	8.37212	1.22267	0.0008	0.0112001
SNOWBALL_006207_st	SLC25A24	7.61336	7.47376	-1.1016	0.0008	0.0113385
SNOWBALL_033271_st	SOX11	2.6513	2.12609	-1.43915	0.0008	0.0113518
SNOWBALL_021800_st	MBNL1	8.30578	8.49816	1.14264	0.0008	0.0113751
SNOWBALL_018465_st	RAMP1	7.0357	6.76051	-1.21016	0.0008	0.011443
SNOWBALL_013818_st	MTRF1	5.65591	5.47703	-1.132	0.0008	0.0114481
SNOWBALL_005433_s_st	EPAS1	9.39397	9.13932	-1.19305	0.0008	0.0114903
SNOWBALL_003486_st	GLIPR2	8.05353	7.89995	-1.11233	0.0008	0.0115751
SNOWBALL_000273_s_st	CD86	6.73543	7.28897	1.46768	0.0009	0.0118295
SNOWBALL_011383_st	LIMCH1,LOC110262081	7.43783	7.55948	1.08798	0.0009	0.0119046
SNOWBALL_010366_st	LTBP2	7.8289	8.04193	1.15912	0.0009	0.0119872
SNOWBALL_047305_st	STMN2	4.92208	4.36967	-1.46652	0.0009	0.0120115
SNOWBALL_009297_st	TTLL7	5.43377	5.8888	1.37081	0.0009	0.0121212
SNOWBALL_011757_st	PDLIM5	9.90233	10.0333	1.09504	0.0009	0.012152
SNOWBALL_000039_st	THBS1	12.8752	12.944	1.0488	0.0009	0.0123187
SNOWBALL_025490_s_st	FH	8.81583	8.92891	1.08154	0.0009	0.0123386
SNOWBALL_005067_st	MEIS1	7.50873	7.65224	1.10459	0.0009	0.0123867
SNOWBALL_028293_st	SPTY2D1	4.60115	4.92218	1.24922	0.0009	0.0124214
SNOWBALL_015908_st	P3H2	6.58757	6.2433	-1.26951	0.0009	0.0124394
SNOWBALL_046524_st	EXT1	5.28924	5.81029	1.435	0.0009	0.0124526
SNOWBALL_007994_st	ADGRG1	6.49919	6.19166	-1.23759	0.0009	0.0125693
SNOWBALL_025049_s_st	PLXND1	6.35717	6.17873	-1.13166	0.0009	0.0126966
SNOWBALL_003111_st	MLANA	5.4255	5.74408	1.24711	0.001	0.0128303
SNOWBALL_027516_st		8.79414	8.97521	1.13373	0.001	0.0128556
SNOWBALL_028303_st	LOC100513133	10.4619	10.7055	1.18391	0.001	0.0131277
SNOWBALL_015770_st	ZIC1	6.03945	5.32629	-1.63939	0.001	0.0131576
SNOWBALL_033198_st	CENPC	4.07433	4.20694	1.09627	0.001	0.0132492
SNOWBALL_002681_st	FKBP3	5.34436	5.7115	1.2898	0.001	0.0132804
SNOWBALL_018757_st	MAP1B	9.51061	9.69661	1.13761	0.001	0.0132964
SNOWBALL_005704_st	RIDA	8.2466	8.45043	1.15175	0.001	0.013356
SNOWBALL_004480_st	TNFRSF17	3.24644	3.59725	1.27528	0.0011	0.0138913
SNOWBALL_035782_st	CCDC112	2.09341	2.64419	1.46487	0.0011	0.0142113
SNOWBALL_032542_st	UTRN	4.31397	4.65234	1.26433	0.0011	0.0142653
SNOWBALL_040854_st	FZD1	3.25896	3.66619	1.32614	0.0011	0.0143366
SNOWBALL_004770_st	MGAT4A	4.33976	3.93221	-1.32643	0.0011	0.0143674
SNOWBALL_018685_s_st	GABRP	9.52222	9.12979	-1.3126	0.0011	0.014491
SNOWBALL_018636_st	ARL15	9.00212	8.83389	-1.12368	0.0011	0.0145294
SNOWBALL_016305_s_st	EBF2	6.56108	6.77812	1.16235	0.0011	0.0145464
SNOWBALL_013884_st	AKAP11	6.84921	6.98177	1.09624	0.0011	0.0146207
SNOWBALL_000789_st	EXT1	8.16924	8.38461	1.161	0.0011	0.0146646
SNOWBALL_024565_s_st	RBM34	4.64856	4.51793	-1.09477	0.0011	0.0146702
SNOWBALL_033949_st	SYT11	5.30031	5.73194	1.34876	0.0012	0.0147012
SNOWBALL_002947_st	SQOR	8.36556	8.55746	1.14227	0.0012	0.0147525
SNOWBALL_000427_s_st	NNAT	5.71622	5.2853	-1.34809	0.0012	0.0147545
SNOWBALL_009792_st	LOC110261673	9.00037	8.75516	-1.18526	0.0012	0.0150398
SNOWBALL_023273_st	TNC	11.4966	11.7499	1.19191	0.0012	0.0150605
SNOWBALL_022089_st	LOC110258338	5.99149	5.69942	-1.2244	0.0012	0.0152723
SNOWBALL_002965_st	MLLT3	4.87416	4.54107	-1.25971	0.0012	0.0153717
SNOWBALL_004669_st	OGN	7.71412	7.01157	-1.62738	0.0012	0.0154314
SNOWBALL_000588_s_st	SYCP2	5.30463	5.80005	1.40973	0.0012	0.0154866
SNOWBALL_014439_st	MYO1D	9.86174	10.0316	1.12495	0.0013	0.0157165
SNOWBALL_015639_s_st	NCEH1	7.96433	8.15494	1.14125	0.0013	0.0157682
SNOWBALL_005972_st	SYT11	5.89503	6.14747	1.19122	0.0013	0.0158513
SNOWBALL_038998_st	RIMS1	1.32967	1.05475	-1.20992	0.0013	0.0159046
SNOWBALL_023077_st	TNIK	6.24764	6.45231	1.15242	0.0013	0.0160079
SNOWBALL_042005_st	MBNL1	4.35244	4.7067	1.27833	0.0013	0.0161619
SNOWBALL_010317_s_st	CTSH	10.1396	10.3784	1.17999	0.0013	0.0163059
SNOWBALL_020833_st	ACSL4	8.27692	8.44135	1.12072	0.0014	0.0165421
SNOWBALL_047506_s_st	AHNAK	6.30447	6.75179	1.36351	0.0014	0.0167682
SNOWBALL_031453_st	PGAP1	3.98228	4.3711	1.30932	0.0014	0.0168108
SNOWBALL_011626_s_st	PGRMC2	7.77137	7.92397	1.11157	0.0014	0.0172552
SNOWBALL_009956_s_st	TFEB	5.41925	5.20495	-1.16015	0.0014	0.0173095
SNOWBALL_026846_s_st	IGF2	6.83804	6.62719	-1.15737	0.0014	0.0173095
SNOWBALL_005189_st	LOC100625479	9.11033	9.40086	1.2231	0.0014	0.0173651
SNOWBALL_012779_s_st	APLP2	9.0511	9.18156	1.09464	0.0015	0.0175066
SNOWBALL_002370_st	PRTG	5.35014	5.56436	1.16008	0.0015	0.0175516
SNOWBALL_027885_st	MAP1B	8.29344	8.5571	1.20052	0.0015	0.0176827
SNOWBALL_013196_st	TAF1D	7.08957	6.74423	-1.27045	0.0015	0.0178026
SNOWBALL_028180_st	EVI5	4.0486	4.33379	1.21857	0.0015	0.0179605
SNOWBALL_000697_st	RHOB	7.3116	7.1241	-1.13879	0.0015	0.0179653
SNOWBALL_021735_s_st	SLIRP	8.44242	8.30667	-1.09866	0.0015	0.017967
SNOWBALL_030506_st		5.04207	5.39706	1.27898	0.0015	0.0182456
SNOWBALL_042290_st	IL1RAP	4.4854	4.8625	1.29873	0.0016	0.0183342
SNOWBALL_001509_s_st	ARG2	5.26427	4.84653	-1.33584	0.0016	0.0187627
SNOWBALL_000203_st	CCL3L1	3.85096	3.61936	-1.17413	0.0016	0.018798
SNOWBALL_011490_st	PDGFC	5.48879	5.77946	1.2232	0.0016	0.0188928
SNOWBALL_002336_st	SLC35A1	6.963	7.20424	1.18201	0.0016	0.018965
SNOWBALL_025131_st	NCEH1	5.53618	5.753	1.16217	0.0016	0.0190575
SNOWBALL_003004_st	TYRP1	3.52549	4.31655	1.73034	0.0017	0.0194678
SNOWBALL_012755_s_st	ETS1	8.30124	8.11505	-1.13776	0.0017	0.0194951
SNOWBALL_006831_st	EIF3L	9.30781	9.18762	-1.08688	0.0017	0.0196529
SNOWBALL_023063_st	SMAP2	9.1071	9.28614	1.13213	0.0017	0.019707
SNOWBALL_004838_s_st	NCK2	7.24973	7.09458	-1.11354	0.0017	0.019728
SNOWBALL_018703_s_st	SGCD	7.93251	7.69423	-1.17958	0.0017	0.0197656
SNOWBALL_005509_st	CLIP4	8.09735	8.25516	1.11559	0.0017	0.0198373
SNOWBALL_037186_st	SIX3	6.17026	6.46126	1.22348	0.0018	0.0201453
SNOWBALL_021318_s_st	RAB23	7.11329	7.24465	1.09532	0.0018	0.0201538
SNOWBALL_029651_st	CDC27	5.57618	5.80946	1.1755	0.0018	0.0202991
SNOWBALL_035039_st		3.14076	2.81936	-1.24954	0.0018	0.0203947
SNOWBALL_043844_st	GPC6	4.6224	4.93775	1.24432	0.0018	0.0204139
SNOWBALL_008042_st	SALL1	5.545	5.82818	1.21687	0.0018	0.0205744
SNOWBALL_005602_st	FBXO32	7.46715	7.82491	1.28143	0.0018	0.0206003
SNOWBALL_004183_s_st	TNC	11.8647	12.0211	1.11453	0.0018	0.0206256
SNOWBALL_027360_st	PTBP3	7.19065	7.4634	1.20811	0.0018	0.0207057
SNOWBALL_006576_st	NGF	7.01411	6.71486	-1.23051	0.0018	0.0207062
SNOWBALL_033994_st	SEMA3C	7.9662	8.17611	1.15662	0.0018	0.0207593
SNOWBALL_032582_st	CMTR2	4.31374	4.63373	1.24833	0.0019	0.0209285
SNOWBALL_011421_st	AREG	5.19227	5.64244	1.3662	0.0019	0.0209626
SNOWBALL_025691_st	DDAH1	9.7251	9.88179	1.11473	0.0019	0.0209952
SNOWBALL_030188_st	RBKS	6.80426	7.03697	1.17504	0.0019	0.0210894
SNOWBALL_010856_st	NPTN	8.49915	8.66362	1.12075	0.0019	0.021169
SNOWBALL_032717_st		2.38788	2.7415	1.27777	0.0019	0.0212905
SNOWBALL_002114_st	UTRN	8.95237	9.10682	1.113	0.0019	0.0213861
SNOWBALL_017849_s_st	CYBRD1	5.37858	5.59975	1.16568	0.0019	0.0214771
SNOWBALL_013906_st	PCCA	6.3755	6.14381	-1.17421	0.002	0.0216843
SNOWBALL_021523_s_st	FJX1	6.24928	5.97333	-1.21079	0.002	0.0217467
SNOWBALL_034754_st		4.99481	4.69297	-1.23272	0.002	0.0217906
SNOWBALL_000587_s_st	SYCP2	7.29478	7.72368	1.3462	0.002	0.0222301
SNOWBALL_034403_st	LOC100621115	4.90869	4.58465	-1.25184	0.0021	0.0227244
SNOWBALL_017966_st	ATG9A	6.59009	6.77483	1.13661	0.0021	0.0228186
SNOWBALL_017148_s_st	TET1	5.68275	5.49155	-1.14171	0.0021	0.0228559
SNOWBALL_018227_st	LOC100521170	5.40132	5.55627	1.11339	0.0021	0.0231766
SNOWBALL_023406_s_st	CDH5	4.77936	4.05544	-1.65166	0.0022	0.0231842
SNOWBALL_026849_st	EPB41L1	3.7508	4.02261	1.20732	0.0022	0.0232814
SNOWBALL_040122_st	R3HCC1	4.52062	4.27168	-1.18834	0.0022	0.0233076
SNOWBALL_012520_st	PHTF2	6.2797	6.53772	1.19583	0.0022	0.0233491
SNOWBALL_015782_st	HEG1	6.73733	6.94876	1.15784	0.0022	0.0233984
SNOWBALL_025702_s_st	MEAF6	8.02576	7.89059	-1.09823	0.0022	0.0235473
SNOWBALL_005432_st	LBH	7.09825	7.36953	1.20688	0.0022	0.0236301
SNOWBALL_006884_st	HOXC4	3.79221	4.08756	1.22718	0.0023	0.0239817
SNOWBALL_034953_st	PDLIM5	8.47121	8.73441	1.20014	0.0023	0.023998
SNOWBALL_007209_st	MFAP5	7.87542	8.21168	1.26248	0.0023	0.0242311
SNOWBALL_035197_st	SEMA3D	6.01721	6.37836	1.28445	0.0023	0.02425
SNOWBALL_011670_st	PDPK1,LOC102160979	1.66324	1.94612	1.21662	0.0023	0.0242782
SNOWBALL_014595_s_st	MYO1D	9.83587	10.0276	1.14215	0.0023	0.024459
SNOWBALL_034436_st	FAM46C	4.32536	4.56274	1.17885	0.0023	0.0246073
SNOWBALL_003722_st	SEC61B	7.21366	7.08645	-1.09217	0.0023	0.0246353
SNOWBALL_042873_st		4.4593	4.7538	1.22646	0.0024	0.0247733
SNOWBALL_004675_st	ACTR1B	9.3602	9.20006	-1.11739	0.0024	0.024801
SNOWBALL_037245_st	ENC1	8.09295	8.4758	1.30392	0.0024	0.0250973
SNOWBALL_044231_st	EPN1	5.71619	5.95562	1.18053	0.0024	0.0251108
SNOWBALL_033437_st	MBNL1	5.20798	5.61716	1.32793	0.0024	0.0251163
SNOWBALL_007283_st	KLHL42	7.58091	7.43654	-1.10525	0.0024	0.0252365
SNOWBALL_009696_st	CARMIL1	6.70391	6.59335	-1.07964	0.0025	0.025507
SNOWBALL_043895_st	LIF	5.8537	6.205	1.27571	0.0025	0.0256643
SNOWBALL_008572_st	RPL13A	5.7767	5.9018	1.09058	0.0025	0.0256819
SNOWBALL_011294_st	CPEB2	8.24202	8.43041	1.13949	0.0025	0.0258578
SNOWBALL_020483_st	CHRDL1	10.0281	10.1449	1.08438	0.0025	0.0259656
SNOWBALL_007000_s_st	NPFF	4.34436	4.80446	1.37563	0.0025	0.0260313
SNOWBALL_033648_st	BLCAP	5.43218	5.68173	1.18883	0.0025	0.0260679
SNOWBALL_006650_st	DDAH1	9.34666	9.49891	1.11131	0.0025	0.0260839
SNOWBALL_019816_st	MPP6	5.40855	5.70968	1.23211	0.0025	0.0261271
SNOWBALL_022616_s_st	EIF4EBP1	8.71259	8.53179	-1.13351	0.0025	0.0261518
SNOWBALL_034502_st	SCARA3	8.12047	7.9725	-1.10801	0.0026	0.0263401
SNOWBALL_046640_st	TNIK	6.79685	7.18252	1.30646	0.0026	0.0265292
SNOWBALL_021116_s_st	CDIPT	7.00875	7.23599	1.17059	0.0026	0.0265705
SNOWBALL_022337_s_st	RALB	7.29304	7.14645	-1.10695	0.0026	0.0267088
SNOWBALL_012248_st	LOC110260727	4.83943	4.72188	-1.08488	0.0026	0.0268602
SNOWBALL_026513_st	LHFP	6.4336	6.68913	1.19378	0.0027	0.0270196
SNOWBALL_018178_st	ACADL	7.83402	8.0377	1.15163	0.0027	0.0270561
SNOWBALL_034585_st		2.18375	2.46602	1.2161	0.0027	0.0270683
SNOWBALL_018275_s_st	COL6A3	8.62988	8.43441	-1.1451	0.0027	0.0270757
SNOWBALL_025794_st	BICD2	6.49143	6.69633	1.1526	0.0027	0.0273219
SNOWBALL_032586_st		2.4712	2.66433	1.14324	0.0027	0.027358
SNOWBALL_026476_s_st	DCP1A	6.39924	6.54142	1.10358	0.0027	0.027485
SNOWBALL_027000_st	C7H14orf1	7.88432	8.01784	1.09697	0.0027	0.0275859
SNOWBALL_035435_st	CORO6	5.67	5.92811	1.19591	0.0027	0.0276038
SNOWBALL_043640_st	USP45	2.279	2.49897	1.16471	0.0027	0.0276206
SNOWBALL_012319_st		7.90069	7.70361	-1.14638	0.0028	0.0276792
SNOWBALL_021253_s_st	PKIG	6.44094	6.63998	1.14793	0.0028	0.0278196
SNOWBALL_026797_st	NOTCH1	5.49954	5.24404	-1.19375	0.0028	0.0278513
SNOWBALL_019447_s_st	LOC100737533	4.57086	4.23448	-1.26258	0.0028	0.0280402
SNOWBALL_021682_st	ZXDC	4.29662	4.5692	1.20797	0.0028	0.028157
SNOWBALL_021156_st	UBE2V1	7.85383	7.95858	1.07531	0.0028	0.0282478
SNOWBALL_034278_st	CCDC88A	4.31881	4.64399	1.25282	0.0028	0.028308
SNOWBALL_026342_st	PLXNC1	3.21646	3.98535	1.70396	0.0029	0.0284526
SNOWBALL_024818_s_st	ADD3	6.07498	6.26056	1.13728	0.0029	0.0285959
SNOWBALL_047051_st	PIK3C2A	7.8844	8.04528	1.11797	0.0029	0.0287049
SNOWBALL_016016_st	LPP	9.10455	9.27217	1.12321	0.0029	0.0288146
SNOWBALL_045136_st	SPTBN1	8.13771	8.23168	1.06731	0.0029	0.0290827
SNOWBALL_036122_st	MMP14	1.48785	1.30714	-1.13344	0.003	0.0292176
SNOWBALL_027179_st	TGOLN2	6.91971	7.07543	1.11398	0.003	0.0292247
SNOWBALL_004413_s_st	LOC100521482	8.60624	8.48702	-1.08614	0.003	0.0294148
SNOWBALL_047586_st	FZD1	7.36625	7.53148	1.12134	0.003	0.0295607
SNOWBALL_018654_st	LOC100737060	3.90984	3.67554	-1.17633	0.003	0.029611
SNOWBALL_004994_st	PAIP2B	4.93238	4.61972	-1.24199	0.003	0.0296588
SNOWBALL_003943_st	TCP1	6.81332	6.43898	-1.29624	0.003	0.0297253
SNOWBALL_012819_st	VWA5A	7.71223	7.41621	-1.22776	0.0031	0.029825
SNOWBALL_011907_st	RPS3A	4.05117	4.78513	1.66319	0.0031	0.0298555
SNOWBALL_028591_st	HACD2	5.718	6.05257	1.261	0.0031	0.030095
SNOWBALL_017844_st	PPP2CB	8.9413	9.03924	1.07025	0.0031	0.0301183
SNOWBALL_014719_st	ANKRD40	7.68704	7.81319	1.09138	0.0031	0.030142
SNOWBALL_005882_st	TOX	8.03868	8.30283	1.20093	0.0031	0.03026
SNOWBALL_033870_st	MBNL1	5.2474	5.66387	1.33465	0.0031	0.0303399
SNOWBALL_003302_st	TMEM87A	7.42819	7.59849	1.12529	0.0031	0.0304367
SNOWBALL_023956_s_st	SERPINE2	8.45291	8.66645	1.15953	0.0032	0.0305991
SNOWBALL_016953_s_st	CACUL1	7.67232	7.7899	1.08491	0.0033	0.0312353
SNOWBALL_027930_st	MSX2	3.55696	3.74756	1.14124	0.0033	0.0314041
SNOWBALL_018433_x_st		9.79508	9.57037	-1.16854	0.0033	0.0314175
SNOWBALL_000338_s_st	ANXA8	7.7365	7.47311	-1.2003	0.0033	0.0315325
SNOWBALL_026601_st	COL6A2	10.5207	10.4061	-1.08271	0.0033	0.0317385
SNOWBALL_035466_st	LOC106506806	4.71022	5.05911	1.27358	0.0034	0.0320535
SNOWBALL_021345_st	STOM	6.81739	6.97969	1.11907	0.0034	0.0320591
SNOWBALL_002711_st	ERMP1	5.72054	5.91795	1.14664	0.0034	0.0321023
SNOWBALL_008346_s_st	AXL	8.28299	8.4386	1.11389	0.0034	0.0324156
SNOWBALL_010692_st	COQ6	6.68654	6.84683	1.11751	0.0034	0.0324196
SNOWBALL_025426_st	DPYSL3	9.00097	9.17789	1.13046	0.0034	0.032555
SNOWBALL_017869_s_st	B3GALT1	4.46745	4.69779	1.17311	0.0035	0.0326089
SNOWBALL_000275_st	CD47	9.53464	9.68401	1.10908	0.0035	0.0327537
SNOWBALL_044324_s_st	TRIOBP	9.00227	9.14328	1.10268	0.0035	0.033056
SNOWBALL_029572_st	ZC3HAV1	5.4685	5.79253	1.25182	0.0035	0.0332109
SNOWBALL_017380_s_st	AVPI1	6.3069	6.03806	-1.20484	0.0036	0.0332998
SNOWBALL_008647_st	CAMK2N1	6.27963	6.11995	-1.11704	0.0036	0.033453
SNOWBALL_000279_s_st	CD47	8.76028	8.93827	1.13131	0.0037	0.0340225
SNOWBALL_000276_s_st	CD47	3.62524	3.99568	1.29275	0.0037	0.0341188
SNOWBALL_038334_st		3.33334	3.51117	1.13118	0.0037	0.0341606
SNOWBALL_028073_st	FAM171A1	8.06151	8.20844	1.10721	0.0037	0.0344238
SNOWBALL_035743_st	LOXL2	10.0867	9.88457	-1.15043	0.0037	0.0344239
SNOWBALL_044895_st	UBQLN2	7.3638	7.25262	-1.08012	0.0037	0.0344699
SNOWBALL_033964_s_st	SCARA3	7.29687	7.1307	-1.12208	0.0037	0.0344777
SNOWBALL_016176_st	TMEM45A	8.12955	8.34754	1.16311	0.0037	0.0345676
SNOWBALL_031009_st	CAMKK1	4.88344	5.07697	1.14356	0.0037	0.0345714
SNOWBALL_018588_st	SKP2	7.00745	6.77809	-1.17232	0.0038	0.0348076
SNOWBALL_009123_st	EPB41L3	6.81053	6.92265	1.08081	0.0038	0.0349438
SNOWBALL_029001_st	NRP2	6.54187	6.82243	1.21467	0.0038	0.0349732
SNOWBALL_011915_st	TBCK	6.31573	6.52523	1.15628	0.0038	0.0350791
SNOWBALL_006820_st	NUAK1	8.01726	7.84632	-1.12579	0.0038	0.0351191
SNOWBALL_012261_st	SYTL2	9.55917	9.72641	1.12291	0.0038	0.0351237
SNOWBALL_034343_st		5.94945	6.27942	1.25699	0.0038	0.035193
SNOWBALL_035476_st		1.46703	1.78555	1.24705	0.0039	0.0354247
SNOWBALL_012974_st	RPS6KC1	7.74387	7.83783	1.0673	0.0039	0.035428
SNOWBALL_033360_st	LOC110257572	6.3931	6.69077	1.22915	0.0039	0.0358349
SNOWBALL_002196_st	CTGF	9.96327	10.1745	1.15766	0.0039	0.035856
SNOWBALL_035112_st	ZNF618	5.2114	4.98107	-1.1731	0.0039	0.0358731
SNOWBALL_003587_st	GNA14	5.67883	6.044	1.28803	0.0039	0.0358928
SNOWBALL_042295_st	ZBTB20	5.89498	6.19769	1.23346	0.004	0.0361486
SNOWBALL_016376_s_st	EXTL3	5.20894	5.47496	1.20248	0.004	0.0365059
SNOWBALL_026935_st	AIMP1	7.76369	7.89403	1.09455	0.0041	0.0366089
SNOWBALL_009079_st	PTPRF	7.39635	7.56504	1.12404	0.0041	0.0366205
SNOWBALL_024729_st	FAM213A	8.38488	8.65047	1.20213	0.0041	0.0366684
SNOWBALL_004980_st	ERLEC1	8.47146	8.58324	1.08056	0.0041	0.036809
SNOWBALL_032929_st	ATXN1	5.13572	5.47901	1.26865	0.0041	0.0368295
SNOWBALL_022823_s_st	ETS1	7.43083	7.27776	-1.11193	0.0041	0.0369173
SNOWBALL_024482_s_st	HERC4	6.67818	6.82575	1.1077	0.0041	0.0370461
SNOWBALL_018517_st	EIF4E2	7.24809	7.17697	-1.05054	0.0041	0.0370481
SNOWBALL_020472_st	MOSPD1	7.33821	7.13059	-1.15478	0.0041	0.0371104
SNOWBALL_036927_st	LOC100513133	10.0515	10.214	1.11924	0.0042	0.0372851
SNOWBALL_021769_s_st	CUL1	7.33026	7.48639	1.1143	0.0042	0.0373332
SNOWBALL_005202_st	OSR1	6.11606	6.44437	1.25554	0.0042	0.0374822
SNOWBALL_001458_s_st	TMEM63B	6.69743	6.8374	1.10188	0.0042	0.0374848
SNOWBALL_015880_st	TFG	10.4871	10.618	1.09497	0.0042	0.0377018
SNOWBALL_020481_s_st	FHL1	7.48427	7.61061	1.09152	0.0044	0.0385744
SNOWBALL_028838_st	PRRC1	5.75113	6.09312	1.2675	0.0044	0.0388571
SNOWBALL_034173_st	SLC4A7	1.6832	2.02272	1.26533	0.0045	0.0391648
SNOWBALL_013249_s_st	EPRS	6.17975	6.33416	1.11297	0.0045	0.0392216
SNOWBALL_027257_st	FBXO28	7.72926	7.95271	1.16752	0.0045	0.0395168
SNOWBALL_029589_st	CD47	6.74146	6.99412	1.1914	0.0045	0.0396072
SNOWBALL_046803_st	TRIM71	1.64684	1.38594	-1.19822	0.0045	0.039676
SNOWBALL_011955_st	TRMT10A	6.59221	6.73472	1.10382	0.0045	0.039733
SNOWBALL_045530_st	LAS1L	3.53835	3.82325	1.21833	0.0046	0.0397692
SNOWBALL_001893_st	IL13RA1	6.86056	6.67917	-1.13397	0.0046	0.0400574
SNOWBALL_046200_st	RGMB	2.92857	3.29061	1.28524	0.0046	0.0401093
SNOWBALL_013867_st	LACC1	6.60443	6.88101	1.21132	0.0046	0.0402174
SNOWBALL_034671_st	TRIM37	4.45092	4.12397	-1.25436	0.0046	0.0402259
SNOWBALL_036103_st	PCF11	2.26784	2.58777	1.24827	0.0047	0.0404165
SNOWBALL_015204_st	C13H3orf35	2.84773	2.4616	-1.30689	0.0047	0.0404857
SNOWBALL_013463_st	COMMD3	7.80121	7.66777	-1.0969	0.0047	0.0407101
SNOWBALL_022127_st	AKAP13	6.22845	6.45595	1.17081	0.0047	0.0407101
SNOWBALL_037323_st	LRRC47	4.62635	4.4341	-1.14254	0.0047	0.0408254
SNOWBALL_041527_st	CRTAP	4.61963	4.87411	1.1929	0.0047	0.040846
SNOWBALL_022795_s_st	CTSB	10.8007	10.654	-1.10701	0.0048	0.0409996
SNOWBALL_026490_st	SOAT1	6.15182	6.37437	1.16679	0.0048	0.0410644
SNOWBALL_028619_st		4.9034	5.11186	1.15545	0.0048	0.0412669
SNOWBALL_033669_st	SPTBN1	8.58005	8.71626	1.09901	0.0049	0.0416326
SNOWBALL_025773_st	IMMT	7.75914	7.67577	-1.05949	0.0049	0.0418189
SNOWBALL_017397_st	ENTPD7	6.68279	6.92155	1.17998	0.0049	0.0419484
SNOWBALL_035210_st	FBXL20	5.9056	6.22523	1.24801	0.0049	0.0420989
SNOWBALL_036756_st	ZBTB7A	6.00849	6.23438	1.1695	0.0049	0.042131
SNOWBALL_020200_st	HUWE1,MIR98,MIRLET7F-1	8.89071	8.98211	1.06541	0.0049	0.042209
SNOWBALL_031266_st	LOC106504991	5.20245	5.45143	1.18837	0.005	0.0422244
SNOWBALL_021427_st	ADGRG6	5.40252	5.75835	1.27972	0.005	0.0423951
SNOWBALL_036558_st		1.94207	2.33106	1.30948	0.005	0.0425314
SNOWBALL_017916_st	SAP130	7.83053	7.92139	1.065	0.005	0.0425537
SNOWBALL_001852_s_st	TMEM255A	9.47777	9.68577	1.15509	0.005	0.0425995
SNOWBALL_000660_st	NR3C1	7.25936	7.11263	-1.10706	0.005	0.0427462
SNOWBALL_018280_st	FARP2	4.26542	4.49365	1.17139	0.005	0.042784
SNOWBALL_019787_st	LOC110257802	8.7941	8.88847	1.0676	0.005	0.0427895
SNOWBALL_030196_st	MEX3B	4.91941	4.77637	-1.10423	0.0051	0.0428465
SNOWBALL_004765_st	ZC3H7A	7.39979	7.52982	1.09431	0.0051	0.04312
SNOWBALL_031051_st	GLG1	6.9412	7.07359	1.09611	0.0051	0.0431677
SNOWBALL_043150_st	VCPKMT	4.81474	5.01983	1.15276	0.0051	0.0432171
SNOWBALL_028383_st	SGCD	4.01215	3.73819	-1.20912	0.0051	0.04338
SNOWBALL_015845_st	SYNJ1	6.20023	6.3308	1.09472	0.0052	0.0436447
SNOWBALL_026223_s_st	F3	7.07333	7.51625	1.35935	0.0052	0.0436539
SNOWBALL_004207_st	PCSK6	7.05643	7.2274	1.12582	0.0052	0.0438739
SNOWBALL_011960_st	FGF2	9.10025	9.39529	1.22692	0.0052	0.043973
SNOWBALL_002949_s_st	B2M	9.39703	9.50693	1.07915	0.0053	0.0440661
SNOWBALL_010606_st	ADAMTSL3	6.07346	6.2323	1.11639	0.0053	0.0440764
SNOWBALL_005807_st	LYPLA1	8.38389	8.46791	1.05997	0.0053	0.0440947
SNOWBALL_000290_st	MX2	5.36191	6.14783	1.7242	0.0053	0.0443932
SNOWBALL_000698_st	ADAM17	7.18273	7.08326	-1.07138	0.0053	0.0444471
SNOWBALL_012254_st	PGM2L1	5.35904	5.57659	1.16275	0.0054	0.0447479
SNOWBALL_017616_st		5.06158	4.8511	-1.15707	0.0054	0.0448334
SNOWBALL_012628_st	CLMP	8.65861	8.51282	-1.10633	0.0054	0.0448582
SNOWBALL_009344_st	SZRD1	8.03727	8.11651	1.05646	0.0054	0.0448598
SNOWBALL_018441_s_st	COL6A3	8.7754	8.59503	-1.13317	0.0054	0.0448857
SNOWBALL_001506_s_st	ARG2	5.17661	4.71075	-1.38113	0.0054	0.0449144
SNOWBALL_008124_st	ZNF566,LOC110255280	4.12032	4.51012	1.31021	0.0054	0.0449462
SNOWBALL_028023_st	ABHD2	8.29004	8.46566	1.12945	0.0054	0.0449652
SNOWBALL_000812_st		8.08104	8.2374	1.11447	0.0054	0.0450524
SNOWBALL_010661_st		11.2753	11.3862	1.07987	0.0055	0.0452285
SNOWBALL_024026_s_st	COL6A3	6.93287	6.70304	-1.1727	0.0055	0.0452648
SNOWBALL_002270_st	NT5E	6.9905	7.25809	1.2038	0.0055	0.0452717
SNOWBALL_025787_st	INIP	6.14262	6.01262	-1.09429	0.0055	0.0454825
SNOWBALL_041027_st	NUAK1	6.43739	6.28846	-1.10874	0.0055	0.0455998
SNOWBALL_008150_st	LOC100522678	8.36097	8.26108	-1.07169	0.0055	0.0456148
SNOWBALL_019666_st	MTPN	9.21448	9.30698	1.06622	0.0055	0.0456352
SNOWBALL_015836_st	DCBLD2	6.99962	7.09639	1.06937	0.0056	0.0458267
SNOWBALL_009774_st	CMAH	6.62846	6.35432	-1.20928	0.0056	0.0458334
SNOWBALL_004093_st	PRUNE2	7.6142	7.87308	1.19655	0.0056	0.0460248
SNOWBALL_014141_s_st	EIF4A3	8.3752	8.25836	-1.08436	0.0056	0.0460817
SNOWBALL_015968_s_st	MX1	5.79401	6.22134	1.34474	0.0056	0.0461369
SNOWBALL_039918_st	ACAP2	6.64906	6.87537	1.16983	0.0056	0.0461536
SNOWBALL_014715_st	LOC102158372	5.82132	6.06286	1.18225	0.0057	0.0463583
SNOWBALL_042612_st	ATP2A2	6.51094	6.39327	-1.08498	0.0057	0.0466099
SNOWBALL_037970_st		2.51294	2.82785	1.24393	0.0057	0.046677
SNOWBALL_016005_s_st	TMEM45A	9.41248	9.62838	1.16143	0.0057	0.0467387
SNOWBALL_022203_st	FBXO28	6.67879	6.87001	1.14173	0.0057	0.0467533
SNOWBALL_030332_st	ATXN7L3B	7.62382	7.46964	-1.11279	0.0057	0.0468397
SNOWBALL_014456_st	GGNBP2	7.37833	7.50085	1.08863	0.0058	0.0472896
SNOWBALL_003043_st	TJP2	6.96659	6.82612	-1.10227	0.0059	0.0476251
SNOWBALL_017687_st	R3HDM1	8.80907	8.93564	1.09169	0.0059	0.0476707
SNOWBALL_029648_st	LIF	5.03196	5.5212	1.40371	0.0059	0.0477254
SNOWBALL_005009_st	CDC42EP3	8.64312	8.74657	1.07434	0.0059	0.0477938
SNOWBALL_045163_st	ECT2	6.09357	6.29404	1.14907	0.0059	0.0478577
SNOWBALL_030819_st	GLI2	2.66944	2.92847	1.19668	0.0059	0.0479388
SNOWBALL_006448_s_st	PLEKHO1	6.32903	6.08283	-1.18609	0.006	0.0481203
SNOWBALL_000291_s_st	MX1	5.24406	5.90351	1.57948	0.006	0.0481487
SNOWBALL_027879_st	UBQLN1	6.43174	6.56554	1.09718	0.006	0.0484105
SNOWBALL_022218_s_st	GANAB	8.51974	8.62222	1.07362	0.006	0.0484317
SNOWBALL_030665_st	NCOA4	6.53489	6.66629	1.09536	0.006	0.0484914
SNOWBALL_043010_st	CD47	6.06283	6.26834	1.15309	0.006	0.0485398
SNOWBALL_001822_s_st	PLS3	8.64259	8.89615	1.19214	0.006	0.0485538
SNOWBALL_034107_st	KMT2A	7.57415	7.76932	1.14486	0.0061	0.0488219
SNOWBALL_002272_st	MANEA	7.86083	8.04607	1.137	0.0061	0.0488979
SNOWBALL_016402_s_st	RP1L1	5.47905	5.61922	1.10204	0.0061	0.0489013
SNOWBALL_020450_st	INTS6L	5.8958	5.71385	-1.13442	0.0061	0.0489982
SNOWBALL_033879_st	MYO1B	5.98475	6.17215	1.13871	0.0061	0.0490916
SNOWBALL_001819_s_st	PLS3	8.73769	8.98211	1.18461	0.0062	0.0491794
SNOWBALL_010891_st	CPSF2	7.24058	7.4637	1.16725	0.0062	0.0492238
SNOWBALL_014237_s_st	PRKCA	7.5564	7.6939	1.1	0.0062	0.0492244
SNOWBALL_005959_s_st	ATP1B1	7.53138	7.72833	1.14627	0.0062	0.0492977
SNOWBALL_017813_st	UFSP2	6.98429	7.13523	1.11029	0.0062	0.0495174
SNOWBALL_024027_s_st	COL6A3	8.0265	7.78976	-1.17832	0.0062	0.049523
SNOWBALL_032189_st	CHST11	6.50983	6.74756	1.17913	0.0063	0.049869
SNOWBALL_025882_st	CLPB	4.31761	4.02292	-1.22663	0.0063	0.0498816
SNOWBALL_007940_st	RIPOR1	7.28716	7.39354	1.07653	0.0063	0.0499765
SNOWBALL_009216_st	MAP7D1	6.80269	6.69236	-1.07948	0.0063	0.0499856

## Sheet: Table S4
Table S4: Least square mean (LSM), Fold change, P value and adjusted P (FDR) < 5% with colour coding of all differentially expressed genes of myoblasts from pool 5 and pool 20 after 72 h of proliferation permanently cultured at 35°, 37°, 39° or 41°C.
Probeset	anno name local	LSM 35°C P20	LSM 35°C P5	LSM 37°C P20	LSM 37°C P5	LSM 39°C P20	LSM 39°C P5	LSM 41°C P20	LSM 41°C P5	Fold change 35°C P20 P5	Fold change 37°C P20 P5	Fold change T39°C P20 P5	Fold change 41°C P20 P5	P value 35°C P20 P5	P value 37°C P20 P5	P value 39°C P20 P5	P value 41°C P20 P5	FDR 35°C P20 T35 P5	FDR 37°C P20 T37 P5	FDR 39°C P20 T39 P5	FDR 41°C P20 T41 P5
SNOWBALL_024029_s_st	COL6A3	7.99406	8.68097	8.60817	8.7213	8.68554	8.899	8.47836	8.80346	-1.60983	-1.08157	-1.15947	-1.25276	< 0.001	0.4034	0.1249	0.0253	0.00216064	0.673406	0.355433	0.129594
SNOWBALL_024482_s_st	HERC4	7.22503	6.8424	6.81516	6.66576	6.54863	6.65905	6.71418	6.54552	1.30372	1.10911	-1.07955	1.12401	0.0005	0.1099	0.2289	0.0741	0.00814792	0.329867	0.501606	0.259713
SNOWBALL_036874_st	NDFIP1	7.97418	8.14577	8.08711	7.92111	8.18294	8.1519	8.12563	8.17045	-1.1263	1.12195	1.02175	-1.03155	0.0005	0.0007	0.4461	0.276	0.00836235	0.0103816	0.707716	0.555195
SNOWBALL_002516_st	MICAL1	7.32367	7.61606	7.39346	7.35758	7.25816	7.21101	7.02567	6.9606	-1.22467	1.02518	1.03322	1.04613	0.0006	0.6098	0.5038	0.3592	0.00939456	0.81841	0.749823	0.635664
SNOWBALL_028141_st	MANEA	4.61874	4.10885	4.61798	4.20187	4.77267	4.77882	4.71329	4.61818	1.42394	1.33432	-1.00427	1.06815	0.0007	0.0034	0.9602	0.4442	0.00994748	0.0324139	0.985172	0.706376
SNOWBALL_030949_st	ABCB8	5.8831	6.24313	6.1695	6.07324	6.04297	5.82409	5.85217	5.90854	-1.28345	1.06899	1.16383	-1.03985	0.0007	0.2806	0.0219	0.5224	0.010385	0.560005	0.11741	0.762761
SNOWBALL_047457_st	CREBZF	5.44693	4.9389	5.48495	5.19843	5.60818	5.44768	5.70504	5.55919	1.42211	1.21969	1.11767	1.10639	0.0007	0.0319	0.2065	0.2489	0.0105284	0.151366	0.473853	0.525338
SNOWBALL_023510_s_st		8.92127	8.42579	8.40344	7.72817	8.18556	8.18049	8.25243	8.30528	1.40979	1.59689	1.00353	-1.03731	0.0008	< 0.001	0.9666	0.6638	0.0108016	0.00112721	0.987378	0.849257
SNOWBALL_032659_st	FOXP1	9.31333	9.04511	9.22061	9.06411	8.96693	8.88505	8.80138	8.74881	1.20432	1.11458	1.0584	1.03711	0.0008	0.0279	0.224	0.4287	0.0109297	0.138439	0.495691	0.694036
SNOWBALL_034793_st	LOC100623720	8.70897	8.99545	9.24362	9.26391	9.36149	9.45114	9.3789	9.3843	-1.21966	-1.01416	-1.06411	-1.00375	0.001	0.7803	0.228	0.9408	0.0134802	0.908303	0.500602	0.977897
SNOWBALL_041953_st	COG6	1.21312	1.62345	1.66376	1.71191	1.49536	1.34539	1.44219	1.5821	-1.32899	-1.03395	1.10955	-1.10184	0.0011	0.6478	0.1664	0.195	0.0142962	0.840339	0.419668	0.459019
SNOWBALL_000331_st	DLG5	7.42739	7.62024	7.67613	7.61886	7.68453	7.64975	7.75471	7.7173	-1.14302	1.04049	1.0244	1.02627	0.0011	0.2564	0.485	0.4532	0.014371	0.533692	0.7365	0.713091
SNOWBALL_026602_st	LOC100623720	8.70807	9.0016	9.04743	9.05677	9.205	9.20832	9.18658	9.23363	-1.22563	-1.0065	-1.00231	-1.03315	0.0012	0.9024	0.9652	0.5396	0.0155812	0.962481	0.986846	0.774369
SNOWBALL_024818_s_st	ADD3	6.52574	6.11375	6.15533	6.04413	6.1396	6.08257	6.22159	6.05948	1.33051	1.08013	1.04032	1.11892	0.0013	0.3081	0.5967	0.1445	0.0158642	0.588017	0.81043	0.387098
SNOWBALL_007320_st	C2CD5	6.19458	5.8735	6.32723	6.19064	6.26952	6.39508	6.13262	6.12015	1.24927	1.0993	-1.09093	1.00867	0.0014	0.1198	0.1503	0.8827	0.0167591	0.346826	0.396049	0.954251
SNOWBALL_035748_st	ABI1	4.6702	4.05614	4.4944	4.34796	4.29802	4.19853	4.49817	4.5925	1.53057	1.10684	1.07139	-1.06758	0.0016	0.379	0.5474	0.5681	0.0186178	0.652933	0.779389	0.79269
SNOWBALL_034754_st		4.3801	4.99399	4.73024	5.14576	4.83953	4.97564	4.82199	4.86386	-1.53038	-1.33378	-1.09894	-1.02945	0.0017	0.0218	0.4175	0.8012	0.0198367	0.117224	0.684954	0.918474
SNOWBALL_015405_s_st	GNL3	8.09209	7.86813	7.67528	7.65408	7.46125	7.62957	7.50793	7.47899	1.16794	1.0148	-1.12375	1.02026	0.0018	0.7274	0.0124	0.6347	0.0200084	0.882698	0.0799383	0.832978
SNOWBALL_007170_st	LPCAT3	8.56106	8.80122	8.87913	8.97807	8.72984	8.93683	8.43665	8.58776	-1.18112	-1.07099	-1.15428	-1.11042	0.0019	0.145	0.0055	0.0326	0.0208941	0.387943	0.0455135	0.153512
SNOWBALL_026601_st	COL6A2	10.1105	10.3546	10.3927	10.433	10.5962	10.6414	10.5249	10.6539	-1.18443	-1.02834	-1.0318	-1.09347	0.0021	0.5531	0.507	0.0706	0.0225404	0.783123	0.752109	0.251878
SNOWBALL_008098_st	SBSN	3.87406	3.3751	3.84081	3.84417	3.79635	3.72265	3.77222	3.71863	1.4132	-1.00233	1.05241	1.03784	0.0022	0.9807	0.5972	0.7002	0.0232343	0.992634	0.810721	0.86893
SNOWBALL_008718_s_st	PIK3C3	7.06335	6.69942	6.69122	6.79963	6.99251	7.01372	6.95563	6.91764	1.28694	-1.07804	-1.01481	1.02668	0.0023	0.2966	0.8355	0.7103	0.0242655	0.576654	0.933949	0.87402
SNOWBALL_017095_s_st	MCMBP	8.74505	8.50389	8.33472	8.33393	8.40305	8.43729	8.27293	8.21818	1.18195	1.00055	-1.02402	1.03867	0.0024	0.9907	0.6157	0.4251	0.0248735	0.996573	0.822039	0.691077
SNOWBALL_000698_st	ADAM17	6.92321	7.14485	7.18439	7.25503	7.04774	7.06454	7.17772	7.26652	-1.16606	-1.05018	-1.01171	-1.06349	0.0025	0.2694	0.789	0.1696	0.0254656	0.547994	0.912557	0.424166
SNOWBALL_028362_st	PRRX1	7.92773	7.51872	7.52588	7.46133	7.47477	7.39806	7.23241	7.1414	1.32778	1.04576	1.05461	1.06512	0.0025	0.5796	0.5112	0.437	0.0257273	0.800008	0.754918	0.700453
SNOWBALL_021071_s_st	CSTB	8.38778	8.70005	8.84281	8.94472	9.09433	9.15052	9.06869	9.11376	-1.24166	-1.07319	-1.03972	-1.03173	0.0025	0.2607	0.5294	0.6131	0.026125	0.538522	0.76747	0.820485
SNOWBALL_009930_st	PTK7	6.62698	6.92527	7.19302	7.3997	7.36229	7.30833	7.24445	7.27135	-1.22969	-1.15403	1.03811	-1.01882	0.0026	0.0249	0.5275	0.7516	0.0262071	0.128328	0.766191	0.894787
SNOWBALL_026190_s_st	EIF6	7.94277	8.43659	7.93002	8.13879	7.81225	8.03966	7.77582	7.57256	-1.40817	-1.15571	-1.17073	1.1513	0.0028	0.1547	0.1233	0.1652	0.0277784	0.40281	0.352823	0.418013
SNOWBALL_005239_st	CFAP36	6.55696	6.21992	6.25013	6.2242	6.20008	6.37978	6.13688	5.78968	1.26316	1.01813	-1.13265	1.27208	0.0028	0.7894	0.078	0.0022	0.0278412	0.912705	0.267917	0.0236833
SNOWBALL_016589_s_st	PI4KA	8.31105	8.48197	8.78632	8.69207	8.95813	8.86626	8.90646	8.8757	-1.12578	1.06751	1.06575	1.02155	0.0028	0.0698	0.0764	0.5349	0.0281161	0.250113	0.264485	0.771188
SNOWBALL_041575_st	LMO7	6.58899	6.15799	6.37747	6.13045	5.92343	5.74545	5.81277	5.57403	1.34817	1.18675	1.1313	1.17997	0.0028	0.0607	0.1653	0.0689	0.0282616	0.229058	0.41804	0.248111
SNOWBALL_006193_st	LOC110256745	6.40728	6.02769	5.81051	5.78801	5.46578	5.48233	5.28498	5.36003	1.30096	1.01572	-1.01153	-1.0534	0.0029	0.8381	0.8806	0.4984	0.0290259	0.935065	0.953452	0.745921
SNOWBALL_008957_st	AP1G1	7.46354	7.84217	7.71403	7.64231	7.87934	7.94081	8.03102	7.92908	-1.30011	1.05096	-1.04353	1.07321	0.003	0.5173	0.5782	0.3606	0.0293877	0.759205	0.799183	0.636882
SNOWBALL_013411_s_st	UBAP1	8.41134	8.20331	8.23255	8.16222	8.24232	8.16372	8.20953	8.06737	1.15511	1.04995	1.05599	1.10355	0.0031	0.2561	0.2066	0.03	0.0298934	0.533338	0.473979	0.145418
SNOWBALL_019787_st	LOC110257802	9.19722	8.99512	9.00622	8.91179	8.73399	8.72996	8.61646	8.53954	1.15038	1.06764	1.0028	1.05476	0.0031	0.1237	0.9455	0.2043	0.0302116	0.353558	0.979685	0.471058
SNOWBALL_026600_st	COL6A2	8.85622	9.12609	9.25017	9.28634	9.38431	9.45612	9.4313	9.47615	-1.2057	-1.02539	-1.05104	-1.03158	0.0031	0.6474	0.3685	0.5713	0.0302145	0.840175	0.643922	0.794762
SNOWBALL_024026_s_st	COL6A3	6.41961	6.91711	6.79052	6.83	6.68533	7.04197	6.9167	6.94241	-1.41177	-1.02775	-1.28044	-1.01799	0.0031	0.7863	0.0242	0.8597	0.0303944	0.911291	0.125504	0.944518
SNOWBALL_017151_s_st	TRUB1	5.03142	4.6071	4.7259	4.65964	4.60146	4.56668	4.48384	4.54619	1.34194	1.047	1.0244	-1.04417	0.0032	0.5956	0.7799	0.6173	0.0306695	0.809732	0.908094	0.823072
SNOWBALL_030951_st	RNGTT	6.23475	5.94495	6.18268	6.03057	5.94086	6.14587	6.0163	5.98632	1.22247	1.1112	-1.1527	1.021	0.0032	0.0876	0.0261	0.7246	0.0307495	0.287661	0.132222	0.881271
SNOWBALL_040899_st	COPG1	5.72665	5.22752	5.3799	5.17735	5.07423	5.00739	5.23468	5.22353	1.41336	1.15073	1.04742	1.00776	0.0032	0.1789	0.649	0.9393	0.0308356	0.437313	0.841008	0.977289
SNOWBALL_029716_st	UBR5	5.81089	5.12471	5.50616	5.34603	5.61128	5.50779	5.82344	5.57728	1.60902	1.11739	1.07437	1.18604	0.0033	0.4336	0.6108	0.2347	0.0319151	0.697888	0.819026	0.508733
SNOWBALL_001998_st	FUNDC2	4.88921	4.2166	4.55995	4.9463	4.43997	4.59492	4.89542	4.66397	1.59396	-1.30708	-1.11338	1.17402	0.0035	0.0675	0.443	0.2571	0.0332574	0.244972	0.705343	0.534475
SNOWBALL_036068_st	COL6A2	9.63601	9.92641	9.98914	10.0404	10.0706	10.1477	10.0759	10.1535	-1.22298	-1.03621	-1.05491	-1.05531	0.0036	0.5557	0.3791	0.3759	0.0337011	0.784709	0.653086	0.650315
SNOWBALL_022664_s_st	SREBF2	5.62037	5.98294	5.91014	5.91508	6.11416	5.88847	5.81167	5.82198	-1.28571	-1.00343	1.16934	-1.00717	0.0041	0.9642	0.0537	0.9254	0.0369422	0.986518	0.21201	0.971962
SNOWBALL_017938_s_st	PRPF40A	8.30858	8.15315	8.0426	8.03314	7.99489	8.10181	8.08524	8.01744	1.11375	1.00658	-1.07693	1.04812	0.0042	0.8417	0.0356	0.1649	0.0374872	0.936565	0.162842	0.417615
SNOWBALL_022351_st	TIA1	3.80197	3.42322	3.66042	3.58672	3.39137	3.52687	3.56196	3.17895	1.30022	1.05241	-1.09847	1.30405	0.0043	0.5265	0.2513	0.0039	0.0379561	0.765527	0.52809	0.0359073
SNOWBALL_002327_st	RARS2	5.19616	4.87574	4.86629	4.94964	4.90033	4.97448	4.83104	4.90719	1.24869	-1.05948	-1.05274	-1.0542	0.0043	0.4004	0.4534	0.4415	0.0383323	0.670918	0.713225	0.704227
SNOWBALL_035743_st	LOXL2	9.38239	9.77816	9.98201	9.99506	10.1676	10.381	10.0063	10.1927	-1.31564	-1.00909	-1.15946	-1.13794	0.0043	0.9142	0.0922	0.1373	0.0383462	0.967394	0.296919	0.375871
SNOWBALL_008086_st	GPI	9.41278	9.62802	9.71382	9.7467	9.89166	9.9169	9.86059	9.87229	-1.16089	-1.02305	-1.01765	-1.00814	0.0044	0.6196	0.7027	0.8593	0.0387542	0.824399	0.870114	0.944386
SNOWBALL_030432_st	DYRK2	4.93032	4.45465	4.24228	4.2881	4.49763	4.50338	4.48207	4.23379	1.39056	-1.03227	-1.00399	1.18779	0.0045	0.7543	0.9686	0.1037	0.0392545	0.896097	0.988209	0.318431
SNOWBALL_017945_s_st	CHRNA1	6.02327	6.53788	6.48364	7.23181	7.15429	8.56056	6.84195	8.75574	-1.42861	-1.67966	-2.6505	-3.76798	0.0045	0.0002	< 0.001	< 0.001	0.0397603	0.00404942	1.65866e-05	8.3066e-07
SNOWBALL_018275_s_st	COL6A3	8.16523	8.52824	8.48262	8.43593	8.52462	8.82812	8.56518	8.72725	-1.28611	1.03289	-1.23413	-1.11889	0.0046	0.6773	0.0141	0.1606	0.0398273	0.856698	0.0871669	0.411309
SNOWBALL_009956_s_st	TFEB	5.06907	5.43662	5.20438	5.38274	5.27208	5.44219	5.27426	5.41547	-1.29016	-1.13159	-1.12514	-1.10283	0.0046	0.1294	0.1468	0.2237	0.0398747	0.363025	0.390659	0.49524
SNOWBALL_000297_st	SLC39A14	9.15292	9.38006	9.36412	9.41127	9.4673	9.61467	9.78333	9.72915	-1.17051	-1.03322	-1.10754	1.03827	0.0046	0.5042	0.0485	0.4438	0.0400923	0.750147	0.198926	0.706039
SNOWBALL_000185_st	SUPT4H1	7.33792	7.09762	7.35032	7.40423	7.3192	7.33373	7.42788	7.31107	1.18124	-1.03808	-1.01012	1.08434	0.0047	0.4721	0.8452	0.1301	0.0406122	0.727193	0.938265	0.364163
SNOWBALL_032582_st	CMTR2	4.28675	3.72196	4.3546	3.97857	4.875	4.89482	5.0186	4.65962	1.47917	1.29777	-1.01383	1.28252	0.0047	0.0441	0.9098	0.0534	0.0406969	0.187065	0.965515	0.211184
SNOWBALL_006155_st	KIFAP3	7.93646	7.7241	7.99114	7.93266	8.15775	8.19382	8.0744	8.14763	1.15858	1.04137	-1.02532	-1.05207	0.0048	0.3806	0.5858	0.2755	0.0411116	0.654294	0.803763	0.554621
SNOWBALL_021979_s_st	YIPF1	6.02366	6.31281	6.16922	6.2366	6.04386	6.17812	5.90554	5.92034	-1.22192	-1.04781	-1.09753	-1.01031	0.0048	0.4571	0.1484	0.8692	0.0413753	0.716151	0.393139	0.948752
SNOWBALL_000042_s_st	ACTC1	8.27606	8.81235	8.51252	9.21789	8.89814	10.0205	8.50154	9.89577	-1.45024	-1.63057	-2.17709	-2.6285	0.0048	0.0006	< 0.001	< 0.001	0.0415938	0.00864504	0.000222348	2.96378e-05
SNOWBALL_013273_st	AHCTF1	8.47248	8.28106	8.27566	8.12399	8.22072	8.18189	8.16519	8.2345	1.14189	1.11086	1.02728	-1.04921	0.0049	0.0198	0.517	0.2542	0.0416277	0.109902	0.758975	0.531338
SNOWBALL_041210_st		2.87155	2.42316	2.81321	2.63695	2.71709	2.60515	2.6274	2.77079	1.36451	1.12995	1.08068	-1.1045	0.0049	0.2175	0.4269	0.3119	0.0416738	0.48779	0.69258	0.591823
SNOWBALL_029651_st	CDC27	5.96315	5.55592	5.7799	5.66758	5.74556	5.66487	5.74922	5.41635	1.32613	1.08096	1.05753	1.25952	0.0049	0.3815	0.5271	0.0169	0.0418189	0.655062	0.765893	0.0985918
SNOWBALL_022878_st	SMYD3	5.93795	6.29138	6.18928	6.17015	6.39821	6.4669	6.4994	6.3965	-1.2776	1.01335	-1.04876	1.07393	0.0049	0.8622	0.5355	0.3569	0.0421063	0.945698	0.771622	0.633554
SNOWBALL_005704_st	RIDA	8.67977	8.35015	8.49379	8.34614	8.32118	8.20044	8.30697	8.08966	1.25668	1.10776	1.0873	1.16256	0.0051	0.1656	0.2521	0.0482	0.0430407	0.418427	0.529074	0.19815
SNOWBALL_012692_st	CFAP69	5.74104	5.39143	5.09392	4.98288	4.93754	4.83132	4.37818	4.29518	1.27421	1.08	1.07641	1.05922	0.0052	0.3202	0.341	0.4544	0.0439425	0.599815	0.61912	0.713961
SNOWBALL_008940_st	EPS15	9.4511	9.28206	9.2746	9.07766	9.20359	9.11675	9.02104	8.93161	1.12431	1.14626	1.06204	1.06394	0.0055	0.0018	0.119	0.1092	0.0454306	0.0203702	0.345479	0.328398
SNOWBALL_016941_st	LOC100516064	7.11465	7.23468	7.16809	7.14778	7.21903	7.20301	7.28006	7.31293	-1.08675	1.01418	1.01117	-1.02304	0.0056	0.596	0.6752	0.3942	0.0460552	0.80993	0.855613	0.665878
SNOWBALL_032206_s_st		1.67388	1.95854	1.78556	1.82535	1.74962	1.76904	1.81115	1.7629	-1.21812	-1.02796	-1.01355	1.03401	0.0057	0.6615	0.8303	0.5959	0.0464226	0.848028	0.931713	0.80993
SNOWBALL_043112_st	BRF1	4.21222	4.59502	4.00169	4.00178	4.14742	4.08568	4.30997	4.14358	-1.30387	-1.00006	1.04372	1.12225	0.0057	0.9995	0.6141	0.1847	0.0466107	0.999817	0.82097	0.445199
SNOWBALL_007053_st	PYM1	5.221	5.6034	5.32921	5.59665	5.39471	5.41152	5.41293	5.31903	-1.30351	-1.20367	-1.01173	1.06725	0.0057	0.0405	0.8903	0.4452	0.0467313	0.176969	0.957455	0.707104
SNOWBALL_005401_st	LOC110260065	3.65551	4.06042	3.7488	4.08694	3.95046	3.78719	3.89767	4.08716	-1.32401	-1.26412	1.11983	-1.14036	0.0058	0.0172	0.2176	0.1558	0.0470514	0.0998498	0.487869	0.404336
SNOWBALL_007838_s_st	PIEZO1	7.30929	7.5017	7.57766	7.55829	7.57942	7.53818	7.5131	7.56668	-1.14267	1.01352	1.029	-1.03783	0.0058	0.7528	0.5049	0.3886	0.0470751	0.895369	0.750628	0.661096
SNOWBALL_008176_st	LOC100624411	10.9919	11.2257	11.2715	11.2741	11.3232	11.4203	11.3661	11.3463	-1.17595	-1.0018	-1.06958	1.01377	0.0058	0.9723	0.2057	0.792	0.0473453	0.989574	0.47286	0.914063
SNOWBALL_021676_s_st	PFKP	7.43615	7.7054	7.5918	7.60346	7.62354	7.44712	7.54603	7.44191	-1.20518	-1.00812	1.13007	1.07484	0.0059	0.8925	0.0543	0.2379	0.0479684	0.958381	0.21334	0.512554
SNOWBALL_030819_st	GLI2	2.94018	2.42241	2.79177	2.69133	3.00433	2.98172	2.97761	2.5823	1.43174	1.0721	1.01579	1.31522	0.006	0.5474	0.8917	0.0278	0.0480652	0.779379	0.958046	0.13809
SNOWBALL_018040_st	USP37,LOC110257197	3.50338	3.21039	3.4166	3.59564	3.32555	3.21003	3.62866	3.48726	1.22518	-1.13213	1.08336	1.10298	0.0061	0.0717	0.2312	0.1472	0.048917	0.254325	0.504447	0.391272
SNOWBALL_030359_st	DMD	4.28406	3.65845	3.62986	3.69851	3.10278	3.0537	2.77186	2.92115	1.54286	-1.04873	1.0346	-1.10903	0.0062	0.7339	0.8078	0.4627	0.0491646	0.885907	0.921248	0.720332
SNOWBALL_021041_s_st	AIMP1	8.90759	8.6761	8.84278	8.78801	8.69089	8.68048	8.65364	8.63626	1.17404	1.03869	1.00724	1.01212	0.0062	0.4666	0.889	0.8159	0.049215	0.723214	0.956876	0.925062
SNOWBALL_038275_st		3.307	3.23606	3.09366	3.48502	3.33367	3.23234	3.42813	3.34087	1.0504	-1.31163	1.07277	1.06236	0.2532	< 0.001	0.1098	0.1641	0.530209	0.000330567	0.329567	0.416447
SNOWBALL_012248_st	LOC110260727	4.62715	4.70448	4.46796	4.87661	4.76957	4.9689	5.02286	4.80771	-1.05507	-1.32744	-1.14817	1.16083	0.2594	< 0.001	0.0082	0.005	0.537076	0.00053917	0.0602349	0.0424414
SNOWBALL_023946_s_st	KLHL41	3.58962	3.6829	3.30025	4.44892	3.45911	4.41408	3.44759	4.03176	-1.06679	-2.2171	-1.93854	-1.49918	0.6419	< 0.001	0.0002	0.0091	0.837078	0.000874034	0.00370538	0.064364
SNOWBALL_042614_st	KLF12	8.2569	8.1452	8.36027	8.07638	7.98636	8.03256	8.01538	7.86255	1.0805	1.21747	-1.03254	1.11175	0.0463	< 0.001	0.3849	0.0093	0.192881	0.00144625	0.657947	0.0656002
SNOWBALL_035039_st		3.054	2.9897	2.6942	3.61305	2.53719	2.94617	2.99207	3.01412	1.04558	-1.89061	-1.32775	-1.0154	0.7136	< 0.001	0.0303	0.8996	0.875688	0.00179298	0.146358	0.961389
SNOWBALL_000048_s_st	ACTC1	8.79926	9.2394	8.90473	9.86813	9.51483	10.6945	9.22682	10.6766	-1.35673	-1.94991	-2.26533	-2.73169	0.028	< 0.001	< 0.001	< 0.001	0.138555	0.00192523	0.000358037	5.4526e-05
SNOWBALL_024708_s_st	LAS1L	8.71208	8.65472	8.98828	8.65305	8.68246	8.27533	8.55435	8.25874	1.04056	1.26157	1.32604	1.2274	0.3936	0.0001	< 0.001	0.0003	0.665348	0.00246342	0.000507739	0.0061595
SNOWBALL_004593_st	SNX29	5.30873	5.47902	5.54871	4.99692	5.18209	5.15452	4.92788	5.11336	-1.12529	1.4659	1.01929	-1.1372	0.1428	0.0001	0.8062	0.1127	0.38465	0.00299059	0.920526	0.334687
SNOWBALL_004536_st	XPO6	8.72438	8.67444	8.67295	8.3898	8.61408	8.46615	8.39496	8.33371	1.03522	1.21684	1.10798	1.04337	0.3985	0.0002	0.0206	0.3031	0.66932	0.003344	0.11268	0.58318
SNOWBALL_008005_st	VPS4A	5.80877	5.91145	6.00691	5.61524	5.94654	5.86132	5.76064	5.79346	-1.07377	1.31192	1.06085	-1.02301	0.2174	0.0002	0.3024	0.6869	0.487603	0.00345351	0.5825	0.861833
SNOWBALL_018184_s_st	TTN	4.19579	4.55848	4.20552	4.96459	4.51573	6.08954	4.46629	6.00823	-1.28582	-1.6924	-2.9769	-2.91186	0.036	0.0002	< 0.001	< 0.001	0.164091	0.00406898	6.44115e-06	7.883e-06
SNOWBALL_023109_s_st	PLPP2	4.23945	4.38734	4.66411	3.89324	4.16789	4.45585	4.33639	4.10173	-1.10795	1.7063	-1.22091	1.17663	0.3769	0.0002	0.0958	0.1686	0.651246	0.00441792	0.303917	0.42267
SNOWBALL_035615_st	EPDR1	7.54708	7.14731	7.49978	6.85807	7.38095	6.72636	6.98661	6.20195	1.31929	1.56017	1.57417	1.72269	0.0099	0.0002	0.0002	< 0.001	0.0684309	0.00469585	0.0040618	0.000997545
SNOWBALL_003265_s_st	ACTC1	6.33643	6.8013	6.70787	7.44393	6.91559	8.01187	6.63278	7.85551	-1.3802	-1.66562	-2.13803	-2.33388	0.0092	0.0002	< 0.001	< 0.001	0.0648597	0.00473584	0.000182405	6.66897e-05
SNOWBALL_023908_st	TTN	4.68886	4.97578	4.70559	5.50029	4.9418	6.56774	4.93962	6.4824	-1.22003	-1.73471	-3.08642	-2.91356	0.1105	0.0003	< 0.001	< 0.001	0.330948	0.00482711	9.1654e-06	1.52358e-05
SNOWBALL_020326_st	SPIN3	4.18665	4.07355	4.67531	3.84133	4.60585	4.06896	4.5764	4.06814	1.08155	1.78259	1.45083	1.42233	0.5391	0.0003	0.0089	0.0123	0.774095	0.00520934	0.0633587	0.0795048
SNOWBALL_017849_s_st	CYBRD1	5.31685	5.23493	5.6823	5.13491	5.74514	5.65574	5.65471	5.48874	1.05842	1.46144	1.06393	1.12192	0.5029	0.0003	0.4653	0.184	0.749146	0.00560243	0.722279	0.444245
SNOWBALL_014733_st	MPDU1	6.27442	6.25176	5.932	6.32621	5.90837	6.01566	5.894	5.95092	1.01583	-1.31423	-1.07721	-1.04024	0.7962	0.0003	0.2317	0.519	0.916107	0.00571005	0.505077	0.760366
SNOWBALL_016953_s_st	CACUL1	7.68196	7.63632	7.86838	7.55781	7.73973	7.70089	7.86954	7.79428	1.03214	1.24019	1.02728	1.05355	0.512	0.0003	0.5761	0.2851	0.755439	0.00573786	0.797853	0.564791
SNOWBALL_041335_st	LOC102160389	3.01851	2.90058	3.23269	2.83397	2.96166	3.23505	3.0716	2.98769	1.08518	1.31834	-1.20864	1.05989	0.1971	0.0003	0.0066	0.3525	0.461655	0.00586234	0.0515657	0.629566
SNOWBALL_003271_st	RMDN3	4.79567	4.69493	4.80251	4.4394	4.70594	4.81065	4.76551	4.84926	1.07232	1.28619	-1.07528	-1.05977	0.225	0.0003	0.2081	0.3096	0.496892	0.00586943	0.475756	0.58957
SNOWBALL_031619_st	LOC110258845	5.15342	5.08094	5.62105	4.93187	5.81611	5.25525	5.93045	5.4797	1.05152	1.61237	1.47515	1.36675	0.641	0.0003	0.002	0.0093	0.836583	0.00615378	0.022259	0.0655363
SNOWBALL_016176_st	TMEM45A	7.87476	7.76889	8.39419	7.81342	8.48144	8.4487	8.63975	8.48721	1.07615	1.49565	1.02296	1.11153	0.4225	0.0004	0.8023	0.2529	0.688964	0.00618427	0.918848	0.529931
SNOWBALL_008933_st	KLHL21	5.10907	5.21502	5.23626	4.86827	5.2451	5.2231	5.27131	5.1759	-1.07621	1.29055	1.01536	1.06837	0.2139	0.0004	0.7916	0.261	0.483187	0.00638692	0.913804	0.538809
SNOWBALL_032522_st	MAGI1	5.13248	4.72032	5.29012	4.5216	5.11901	4.95768	5.25876	4.88633	1.33067	1.70352	1.11832	1.29452	0.0309	0.0004	0.3679	0.0482	0.148207	0.00722913	0.643403	0.198063
SNOWBALL_021347_st	AQR	4.6448	4.2964	4.31858	4.81836	4.3185	4.22005	4.13655	4.28087	1.27315	-1.41399	1.07062	-1.10521	0.0073	0.0004	0.3983	0.2214	0.0553501	0.00730607	0.669118	0.492563
SNOWBALL_015142_st	TEX14	6.50038	6.13362	7.04826	5.51522	6.79237	5.60657	6.59626	5.5171	1.28945	2.89396	2.2749	2.1128	0.3109	0.0005	0.0038	0.0072	0.590913	0.0076745	0.0349057	0.0547598
SNOWBALL_014237_s_st	PRKCA	7.50473	7.61022	7.78933	7.41214	7.73175	7.63812	7.74979	7.56515	-1.07586	1.29882	1.06706	1.13654	0.2442	0.0005	0.2991	0.0503	0.519907	0.00828913	0.579143	0.203459
SNOWBALL_039248_st	IGFBP2	5.44444	4.99935	4.96409	4.01634	4.41823	3.85714	4.3954	3.99983	1.3614	1.92886	1.47538	1.31546	0.0612	0.0006	0.0219	0.0924	0.230324	0.0087625	0.11756	0.297325
SNOWBALL_038998_st	RIMS1	1.00136	1.33289	0.966051	1.57026	1.18895	1.30169	1.06265	1.11382	-1.25835	-1.52014	-1.08128	-1.0361	0.0319	0.0006	0.4358	0.7215	0.151443	0.00881964	0.69955	0.879696
SNOWBALL_013196_st	TAF1D	7.37894	7.31057	6.76143	7.5339	6.54533	6.77641	6.29124	6.73741	1.04853	-1.70819	-1.17371	-1.36242	0.71	0.0006	0.219	0.0251	0.873858	0.00891661	0.489647	0.128994
SNOWBALL_021835_st	RHNO1	5.13114	4.7432	4.74896	3.95245	4.27999	4.09181	3.83836	3.46852	1.30852	1.73689	1.13932	1.29221	0.054	0.0006	0.3281	0.0649	0.21271	0.00900933	0.607221	0.238998
SNOWBALL_011490_st	PDGFC	6.04349	5.81959	6.07218	5.42584	5.73705	5.53701	5.26513	5.17274	1.16788	1.56519	1.14873	1.06613	0.1643	0.0007	0.2112	0.5559	0.416663	0.00991003	0.479678	0.784773
SNOWBALL_032542_st	UTRN	4.46402	4.38817	4.81598	4.09896	4.73634	4.35827	4.59304	4.41048	1.05398	1.64378	1.2996	1.13489	0.6625	0.0007	0.0415	0.3003	0.848521	0.00996117	0.179716	0.580441
SNOWBALL_022238_st		6.13991	6.28226	6.67625	7.18398	7.02487	7.67786	7.53345	8.23046	-1.1037	-1.42181	-1.57243	-1.62114	0.2563	0.0007	< 0.001	< 0.001	0.533539	0.0100472	0.00164075	0.000969646
SNOWBALL_035820_st	ADORA2B	4.85561	4.48947	4.98119	4.34783	4.873	4.49348	4.98011	4.73948	1.2889	1.55117	1.30091	1.18151	0.0276	0.0007	0.0231	0.1308	0.13731	0.0101525	0.121846	0.365225
SNOWBALL_026891_st	CCRL2	4.45498	4.4088	4.06996	4.50407	4.32893	4.232	4.18668	4.23783	1.03253	-1.35108	1.0695	-1.03609	0.6628	0.0007	0.365	0.6293	0.848697	0.0104066	0.640704	0.829919
SNOWBALL_017783_st	TENM3	6.24854	6.13784	6.82403	6.20135	6.64581	6.33604	6.3632	6.15726	1.07975	1.53973	1.23951	1.15344	0.47	0.0007	0.0549	0.1876	0.725735	0.0106233	0.215038	0.44923
SNOWBALL_016555_st	LIF	7.40237	7.25525	6.79902	6.16565	5.86892	5.52726	5.38453	4.98086	1.10736	1.55118	1.26722	1.32287	0.3516	0.0008	0.0406	0.0181	0.628809	0.0111486	0.177228	0.103441
SNOWBALL_006295_st	EVI5	8.18314	8.02577	7.67796	7.45462	7.29491	7.30546	7.17559	7.03841	1.11525	1.16743	-1.00734	1.09976	0.0103	0.0008	0.8481	0.0222	0.0705862	0.0113012	0.939544	0.118635
SNOWBALL_004902_st	GNPTG	7.20324	7.33734	7.29071	7.58428	7.47689	7.46215	7.45831	7.42694	-1.0974	-1.22567	1.01027	1.02198	0.0782	0.0008	0.8387	0.6657	0.268248	0.0113413	0.935299	0.850278
SNOWBALL_041965_st	PRDM2	6.13151	6.11699	6.06114	6.46242	6.15799	6.11697	6.19778	6.1013	1.01012	-1.32069	1.02884	1.06916	0.8836	0.0008	0.68	0.3377	0.954641	0.011493	0.858078	0.61603
SNOWBALL_037015_st	WISP1	5.74615	6.21996	6.34505	6.96496	6.75239	7.40205	6.91007	7.49019	-1.38877	-1.53678	-1.5688	-1.49497	0.0065	0.0009	0.0006	0.0015	0.051008	0.0118264	0.00876075	0.0176682
SNOWBALL_037323_st	LRRC47	4.57155	4.4605	4.28761	4.76052	4.37195	4.73723	4.50529	4.54715	1.08002	-1.38791	-1.28813	-1.02944	0.3577	0.001	0.0067	0.7258	0.634399	0.0129345	0.0519523	0.88188
SNOWBALL_022986_s_st	SFRP4	9.85853	9.55484	10.0934	9.42885	9.99396	9.2862	9.93652	9.093	1.2343	1.58503	1.63327	1.79443	0.0843	0.001	0.0006	0.0001	0.280934	0.0130351	0.00873766	0.0025027
SNOWBALL_023077_st	TNIK	6.0134	5.96966	6.34163	5.91858	6.68812	6.4934	6.76611	6.60894	1.03078	1.34076	1.1445	1.1151	0.6829	0.001	0.0825	0.1543	0.859662	0.0131024	0.277224	0.402139
SNOWBALL_011465_st	SFRP2	9.97733	9.86309	10.7847	10.1893	11.3322	10.7883	11.5655	11.0367	1.0824	1.51094	1.45788	1.44268	0.467	0.0013	0.0027	0.0033	0.723511	0.0162554	0.0271666	0.0315969
SNOWBALL_030132_st	ADAM19	8.88169	8.76985	9.29214	8.80685	9.30816	8.93909	9.12593	8.78389	1.0806	1.39987	1.29152	1.26754	0.3858	0.0014	0.0096	0.0149	0.658716	0.0166203	0.0667836	0.0906603
SNOWBALL_031051_st	GLG1	6.87244	6.87476	7.18027	6.86574	7.11333	6.96816	7.12833	7.05615	-1.0016	1.24361	1.10586	1.05131	0.9778	0.0014	0.0945	0.3899	0.991514	0.0170907	0.301465	0.662183
SNOWBALL_031772_st		12.3115	12.0943	12.2026	11.8389	12.0176	11.7469	11.7552	11.5677	1.16248	1.28673	1.20636	1.13881	0.0368	0.0015	0.0119	0.0668	0.16649	0.0180735	0.0775788	0.24361
SNOWBALL_021337_s_st	JAK1	9.68106	9.60046	9.796	9.57767	9.90723	9.9256	9.9578	9.90918	1.05746	1.16339	-1.01281	1.03427	0.1809	0.0016	0.7541	0.4112	0.439973	0.018752	0.895976	0.679789
SNOWBALL_000272_s_st	CD86	9.2449	9.26984	9.54877	9.10343	9.31355	8.72978	8.80576	8.36919	-1.01744	1.36164	1.49876	1.35338	0.8347	0.0016	0.0001	0.0019	0.933544	0.018829	0.00312567	0.0210974
SNOWBALL_019447_s_st	LOC100737533	4.58667	4.65568	4.14551	4.86668	4.12833	4.37875	4.07743	4.38233	-1.049	-1.64852	-1.18956	-1.23533	0.7223	0.0016	0.2078	0.1296	0.880063	0.0190338	0.475487	0.36329
SNOWBALL_023056_s_st	SFRP4	8.24275	7.74994	8.41161	7.59175	8.0971	7.26917	8.06738	7.27935	1.40718	1.76523	1.77513	1.72672	0.0377	0.0017	0.0016	0.0023	0.169121	0.0193864	0.0182973	0.02425
SNOWBALL_016912_s_st	CYP2C91	5.31461	5.25263	5.67374	5.03851	5.98101	5.43104	5.86787	5.356	1.0439	1.55319	1.46406	1.4259	0.718	0.0017	0.0049	0.0079	0.878021	0.0194402	0.0419374	0.0583695
SNOWBALL_020575_s_st	FHL1	8.02082	7.93255	8.35727	8.03814	8.25383	8.13445	7.98889	7.75573	1.0631	1.24758	1.08627	1.17541	0.3145	0.0017	0.1793	0.0144	0.594284	0.019821	0.437867	0.0887194
SNOWBALL_030416_st	KCMF1	5.06715	5.05704	5.61657	5.04417	5.61154	5.52226	5.58846	5.54883	1.00703	1.48699	1.06384	1.02785	0.948	0.0018	0.5669	0.7985	0.980623	0.0199815	0.79186	0.917137
SNOWBALL_046200_st	RGMB	3.26316	2.80289	3.72687	2.90299	3.23811	3.10069	2.93431	2.90772	1.3758	1.77016	1.09994	1.0186	0.0527	0.0018	0.541	0.9053	0.209535	0.020106	0.775314	0.963696
SNOWBALL_020907_s_st	SAMM50	7.21959	7.27193	7.17521	7.36947	7.26406	7.27611	7.24409	7.153	-1.03695	-1.14414	-1.00839	1.06517	0.329	0.0018	0.8197	0.0989	0.60806	0.0203548	0.926819	0.309599
SNOWBALL_046425_st	ZNHIT6	8.31092	7.99972	8.29253	7.75494	8.00834	7.57806	7.98474	7.63026	1.24074	1.45155	1.34749	1.27853	0.0481	0.002	0.0092	0.0268	0.197791	0.0216127	0.0652413	0.134748
SNOWBALL_043940_st	MRPL42	5.76298	5.1916	5.80444	4.78336	6.04569	4.98434	6.1225	4.82908	1.48595	2.02943	2.08689	2.45107	0.0556	0.002	0.0015	0.0003	0.21672	0.0218686	0.0175224	0.00487244
SNOWBALL_002504_st	LOC100737265	5.88075	5.74393	6.04138	5.62833	5.80823	5.80126	5.90405	5.83533	1.09948	1.3315	1.00485	1.04878	0.2395	0.002	0.9511	0.5481	0.514428	0.0218742	0.981808	0.779867
SNOWBALL_010096_s_st	LOC110258098	4.91114	5.01238	4.80016	5.19189	4.88881	4.99213	4.95254	4.92758	-1.0727	-1.31197	-1.07424	1.01744	0.3555	0.002	0.346	0.8176	0.632297	0.0221129	0.623639	0.925931
SNOWBALL_018981_st	MTUS1	5.38457	5.29772	4.75258	5.28701	4.45049	4.93502	4.33659	4.83707	1.06205	-1.44836	-1.39914	-1.41468	0.5586	0.002	0.0042	0.0033	0.786534	0.0223037	0.0376446	0.0318854
SNOWBALL_020255_st	LAS1L	7.23261	7.17583	7.39619	7.02602	7.3375	6.83271	7.0816	6.85171	1.04015	1.2925	1.41892	1.17274	0.5807	0.002	0.0001	0.0365	0.800644	0.0223296	0.00290853	0.165363
SNOWBALL_005712_st	ZFHX4	8.28172	8.07395	8.25067	7.95095	8.1563	7.98081	8.03198	7.8592	1.1549	1.2309	1.12935	1.12722	0.0217	0.0021	0.0473	0.0504	0.116666	0.0225339	0.195582	0.203714
SNOWBALL_040363_st	PLCXD2	5.23981	4.9157	5.2815	4.42151	5.10497	4.4707	4.65977	4.29934	1.25188	1.81502	1.55216	1.28381	0.1858	0.0021	0.0156	0.1437	0.446815	0.0225964	0.0934165	0.386001
SNOWBALL_018517_st	EIF4E2	7.43771	7.41294	7.11853	7.27448	7.10572	7.21929	7.0459	7.08565	1.01732	-1.11415	-1.0819	-1.02794	0.5685	0.0021	0.0168	0.364	0.792971	0.0226898	0.0982774	0.639825
SNOWBALL_006444_st	STRIP1	5.76564	5.80655	5.83231	5.53378	5.60894	5.74761	5.74123	5.73065	-1.02876	1.22989	-1.10089	1.00736	0.6236	0.0022	0.1092	0.8987	0.826654	0.0232027	0.328561	0.960987
SNOWBALL_047064_st	ZSWIM6	3.9383	3.90194	3.61067	4.01075	4.04053	4.03913	4.07602	4.18246	1.02552	-1.31957	1.00097	-1.07657	0.7445	0.0022	0.99	0.3461	0.891329	0.0232903	0.99627	0.623723
SNOWBALL_004795_st	OMD	4.54081	4.97431	5.39933	6.22534	5.89501	6.59561	6.48813	6.79252	-1.35051	-1.77279	-1.62519	-1.2349	0.0739	0.0022	0.007	0.198	0.259195	0.0234528	0.0538243	0.462881
SNOWBALL_014054_st	LOC100520401	3.90166	3.99845	3.73249	2.60302	3.52738	3.69448	3.81496	3.62092	-1.06939	2.18779	-1.1228	1.14396	0.7591	0.0022	0.5977	0.5406	0.898411	0.0236115	0.810977	0.775023
SNOWBALL_012878_s_st	CEP350	7.65881	7.53443	7.72573	7.41019	7.64275	7.64826	7.64396	7.65178	1.09004	1.24447	-1.00383	-1.00544	0.1707	0.0022	0.9501	0.9293	0.425767	0.0236398	0.981394	0.973568
SNOWBALL_041972_st	EXOC4	2.68164	2.73106	2.92565	2.37453	2.703	2.86786	2.78081	2.70148	-1.03485	1.46522	-1.12106	1.05653	0.7492	0.0023	0.294	0.6088	0.893629	0.024072	0.573987	0.81786
SNOWBALL_020481_s_st	FHL1	7.54849	7.50713	7.79394	7.51915	7.65139	7.55264	7.44861	7.35814	1.02908	1.20981	1.07085	1.06472	0.5947	0.0024	0.2133	0.2524	0.809144	0.0248247	0.4823	0.529374
SNOWBALL_015620_st	SHQ1	6.20899	6.30079	6.21179	5.68436	6.01567	6.07327	5.99304	6.23994	-1.0657	1.44136	-1.04073	-1.18666	0.5397	0.0024	0.6994	0.1113	0.774436	0.0250574	0.868566	0.332255
SNOWBALL_002753_st	RHOJ	6.75421	6.83905	6.59166	7.10944	6.93102	7.27871	6.73876	6.99552	-1.06057	-1.43175	-1.27252	-1.19479	0.5642	0.0024	0.0282	0.0938	0.790257	0.0253405	0.139292	0.299969
SNOWBALL_009065_s_st	UBR4	8.29676	8.31251	8.29364	8.10617	8.24449	8.21784	8.30104	8.21154	-1.01098	1.13877	1.01865	1.064	0.7669	0.0025	0.6168	0.106	0.902021	0.0255027	0.822762	0.322745
SNOWBALL_010856_st	NPTN	8.57698	8.513	8.71504	8.39692	8.78288	8.66611	8.57956	8.42057	1.04534	1.24671	1.0843	1.11651	0.4809	0.0025	0.2063	0.0918	0.733555	0.025509	0.473723	0.296049
SNOWBALL_017737_st	TENM3	6.56167	6.35481	7.07228	6.65572	6.83875	6.5725	6.62765	6.17828	1.15417	1.33474	1.20268	1.36544	0.0949	0.0025	0.0363	0.0014	0.302116	0.0260488	0.164904	0.0169421
SNOWBALL_000339_s_st	ANXA8	7.81636	7.85808	7.56375	7.88057	7.42396	7.50837	7.28878	7.24095	-1.02934	-1.24558	-1.06025	1.03371	0.6442	0.0025	0.3551	0.5969	0.838316	0.0260679	0.631937	0.810525
SNOWBALL_047382_st		11.701	11.4641	11.564	11.1805	11.3361	11.0641	11.1566	10.9181	1.17848	1.30459	1.20747	1.17977	0.0423	0.0025	0.0221	0.0411	0.181973	0.0261338	0.118431	0.178741
SNOWBALL_020200_st	HUWE1,MIR98,MIRLET7F-1	9.01642	8.95105	9.03158	8.83131	8.9456	8.88818	8.93485	8.89229	1.04635	1.14891	1.0406	1.02993	0.2613	0.0026	0.3215	0.4594	0.539145	0.0263152	0.60104	0.717775
SNOWBALL_035857_st	LOC110260976	3.52858	3.19562	3.2468	3.70639	3.62062	3.52296	3.41327	3.30701	1.25959	-1.37514	1.07004	1.07643	0.0201	0.0026	0.46	0.4222	0.110947	0.0265309	0.718285	0.688726
SNOWBALL_044870_st	ZC3H7A	4.30913	4.08744	4.36744	3.71857	3.83619	3.87908	3.6652	3.92748	1.1661	1.56794	-1.03018	-1.19937	0.2416	0.0026	0.817	0.1695	0.516898	0.0266599	0.925613	0.424001
SNOWBALL_019820_st	TSPAN12	7.40878	7.50868	7.41303	7.08026	6.95935	7.06286	6.24727	6.38817	-1.0717	1.25942	-1.07438	-1.1026	0.3046	0.0028	0.2881	0.1541	0.584591	0.0277739	0.567783	0.401803
SNOWBALL_034415_st	TOM1L2	6.50831	6.44124	6.56883	6.33832	6.48609	6.34728	6.47982	6.54258	1.04759	1.17325	1.10099	-1.04446	0.3196	0.0028	0.0495	0.3508	0.599286	0.0278979	0.201273	0.628089
SNOWBALL_040431_st		2.83924	2.92349	2.95271	2.70914	2.89184	2.94096	2.94605	2.97816	-1.06013	1.18392	-1.03464	-1.0225	0.2406	0.0028	0.4875	0.6486	0.515794	0.0281552	0.738353	0.840808
SNOWBALL_039917_st	LOC110260801	3.92137	3.62972	3.98758	3.59588	4.08817	3.94681	3.86415	3.74204	1.22404	1.31194	1.10294	1.08833	0.0184	0.0028	0.2217	0.2883	0.104697	0.0281558	0.492841	0.568016
SNOWBALL_025794_st	BICD2	6.56895	6.36987	6.68982	6.28271	6.74098	6.6902	6.78556	6.62295	1.14796	1.32603	1.03583	1.11931	0.1044	0.0028	0.6664	0.1788	0.319749	0.0282802	0.850675	0.437078
SNOWBALL_013663_st	TAF3	3.53524	3.60921	3.79809	3.15171	3.51127	3.56548	3.74442	4.0782	-1.05261	1.56524	-1.0383	-1.26031	0.6927	0.0029	0.7718	0.0882	0.864995	0.0284603	0.904307	0.288707
SNOWBALL_012974_st	RPS6KC1	7.63888	7.59006	7.87485	7.67919	7.95413	7.93554	7.88345	7.77069	1.03442	1.14525	1.01297	1.0813	0.3937	0.0029	0.7428	0.06	0.665436	0.0286242	0.890512	0.227379
SNOWBALL_021156_st	UBE2V1	8.02044	7.88725	7.96429	7.75539	7.94439	7.93136	7.9052	7.84132	1.09671	1.15581	1.00907	1.04527	0.0397	0.0029	0.8294	0.2989	0.174884	0.028685	0.931296	0.57897
SNOWBALL_014607_st	SPACA3	2.81201	2.61076	2.48956	3.06756	2.52547	2.66631	2.57984	2.65616	1.14969	-1.49277	-1.10255	-1.05433	0.2396	0.0029	0.4053	0.6495	0.514629	0.0288416	0.674986	0.841282
SNOWBALL_039278_st		1.1833	1.23255	1.17079	1.78482	1.2629	1.32044	1.12325	1.2988	-1.03473	-1.53053	-1.04069	-1.1294	0.7822	0.0029	0.7468	0.3311	0.909251	0.0289427	0.89245	0.610023
SNOWBALL_028034_st		2.01584	1.68299	1.69089	2.31314	1.98059	1.87289	1.90873	1.84421	1.2595	-1.53928	1.07751	1.04574	0.0794	0.003	0.5529	0.7213	0.270748	0.0291128	0.782998	0.879543
SNOWBALL_016204_s_st	GSK3B	8.54184	8.57489	8.75801	8.59597	8.71021	8.74952	8.62503	8.67142	-1.02317	1.11887	-1.02762	-1.03268	0.4861	0.003	0.4089	0.3317	0.737348	0.0293876	0.677954	0.610536
SNOWBALL_007912_s_st	WWOX	5.63746	5.73629	5.73438	5.393	5.29012	5.28386	5.20852	5.33079	-1.0709	1.26697	1.00435	-1.08844	0.3268	0.003	0.9497	0.2287	0.606009	0.0294648	0.981273	0.501411
SNOWBALL_029078_st	IDS	7.92264	7.87695	8.07687	7.70598	8.22938	8.22649	8.26495	8.13007	1.03218	1.29316	1.002	1.098	0.6732	0.003	0.9787	0.2228	0.854531	0.0297671	0.99186	0.494184
SNOWBALL_016339_s_st	EBF2	7.56223	7.49958	7.34591	7.04781	7.17935	7.02676	6.87917	6.89871	1.04439	1.22953	1.11156	-1.01364	0.4743	0.0031	0.0933	0.8222	0.728824	0.0298188	0.29912	0.927904
SNOWBALL_012448_st	C9H11orf65	3.36072	3.20069	3.09412	3.43309	3.22855	3.42645	3.48059	3.56221	1.11731	-1.26485	-1.14703	-1.05821	0.1207	0.0031	0.0596	0.4154	0.34837	0.030447	0.226619	0.683242
SNOWBALL_015831_s_st	LOC110259753,LOC100626360	8.87559	8.73579	8.95031	8.72709	8.87286	8.85384	8.8529	8.70224	1.10175	1.16734	1.01327	1.11007	0.0452	0.0032	0.7714	0.0325	0.189989	0.0306068	0.904118	0.15332
SNOWBALL_021394_s_st	GUCD1	5.28598	5.19904	5.17797	4.68351	5.01692	5.19738	4.88855	5.05282	1.06211	1.4088	-1.13324	-1.1206	0.5524	0.0033	0.2258	0.2683	0.782625	0.0314133	0.497879	0.546714
SNOWBALL_017966_st	ATG9A	6.84002	6.81839	6.86214	6.514	6.87051	6.54892	6.52664	6.47904	1.0151	1.27292	1.2497	1.03354	0.833	0.0033	0.0057	0.6435	0.932864	0.0315168	0.0467582	0.837957
SNOWBALL_001984_st	BRCC3	5.55821	5.65627	5.52745	5.93019	5.81511	6.07006	6.08266	5.93572	-1.07033	-1.32202	-1.19329	1.10722	0.4158	0.0034	0.0452	0.2286	0.683543	0.0324365	0.190066	0.501217
SNOWBALL_035908_st	DIP2B	7.54874	7.44114	7.73302	7.45122	7.66998	7.65507	7.60115	7.54867	1.07743	1.21571	1.01039	1.03704	0.2092	0.0035	0.8584	0.5324	0.477175	0.0326546	0.943979	0.769449
SNOWBALL_028505_st	CA12	5.40942	5.57486	5.77009	6.10412	6.32527	6.6037	6.5259	6.8188	-1.12151	-1.26053	-1.21287	-1.22509	0.1091	0.0035	0.0115	0.0084	0.32837	0.0327376	0.0757365	0.0611887
SNOWBALL_005067_st	MEIS1	7.80765	7.65109	7.6557	7.41371	7.55421	7.47025	7.59139	7.4999	1.11463	1.18263	1.05993	1.06547	0.0416	0.0035	0.2521	0.2138	0.180086	0.0327854	0.529138	0.483019
SNOWBALL_013867_st	LACC1	6.79876	6.59483	6.87325	6.29775	6.85866	6.74571	6.99336	6.77943	1.15183	1.4902	1.08144	1.15984	0.2429	0.0035	0.5114	0.2215	0.518427	0.0328853	0.755044	0.492662
SNOWBALL_033160_st	UST	7.7937	7.62442	8.48029	8.04573	8.69708	8.41196	8.65285	8.45305	1.1245	1.3515	1.21851	1.14854	0.2016	0.0035	0.0394	0.1356	0.467719	0.0330762	0.174009	0.373054
SNOWBALL_005432_st	LBH	7.48016	7.29521	7.70047	7.19091	7.38349	7.02053	6.91401	6.88634	1.13677	1.42361	1.28607	1.01936	0.2327	0.0035	0.027	0.8551	0.506173	0.033107	0.135319	0.942597
SNOWBALL_023050_st	SGCD	8.12343	8.27315	8.06735	8.43239	7.80841	8.03775	7.57415	7.88463	-1.10935	-1.28792	-1.1723	-1.24012	0.1812	0.0036	0.048	0.0105	0.440364	0.0335628	0.197404	0.071085
SNOWBALL_001599_st	CD55	5.97443	6.02118	6.4918	5.9563	6.18542	5.99168	6.1437	5.9711	-1.03294	1.44944	1.14372	1.12709	0.7705	0.0037	0.2366	0.2895	0.903674	0.0340779	0.510906	0.569368
SNOWBALL_002190_st	ADGRG6	8.34272	8.00793	8.32804	7.87492	8.32483	7.98773	8.1964	8.11116	1.26119	1.36899	1.26321	1.06086	0.0233	0.0037	0.0225	0.5322	0.122596	0.0343453	0.119759	0.769324
SNOWBALL_019025_st	GINS4	6.30664	6.1744	5.78501	6.47613	6.04891	6.01551	6.30721	6.09071	1.096	-1.61454	1.02342	1.16191	0.5264	0.0038	0.8721	0.3047	0.765412	0.0348139	0.949925	0.584703
SNOWBALL_047417_st	CCDC112	5.58478	5.38582	6.06043	5.19757	6.46431	5.96087	6.35952	5.8098	1.14787	1.81865	1.4176	1.4638	0.4471	0.0038	0.0661	0.0469	0.708472	0.0350656	0.241994	0.194415
SNOWBALL_034490_st		6.33168	6.13687	6.42617	6.11459	6.22988	5.95633	6.49155	6.3453	1.14457	1.24107	1.20877	1.10669	0.0509	0.0039	0.0092	0.1327	0.205053	0.0353431	0.064841	0.368381
SNOWBALL_029589_st	CD47	7.13468	6.85013	7.08835	6.57184	6.92739	6.88187	6.82605	6.66199	1.21803	1.43049	1.03205	1.12044	0.0817	0.0039	0.7701	0.2999	0.275444	0.0354877	0.903495	0.580084
SNOWBALL_002151_st	UST	7.81672	7.63281	8.39099	7.91761	8.63626	8.37021	8.64449	8.40767	1.13596	1.38836	1.20251	1.17839	0.2092	0.0039	0.0766	0.1114	0.47715	0.0357057	0.264885	0.332431
SNOWBALL_008572_st	RPL13A	5.92644	5.85587	5.87261	5.63799	5.90555	5.81362	5.90259	5.79934	1.05013	1.1766	1.06579	1.0742	0.3271	0.004	0.2064	0.1585	0.606244	0.036091	0.47384	0.408275
SNOWBALL_046228_st	MASTL	2.20785	2.10332	2.44561	1.84183	1.85698	1.87982	1.62743	1.81824	1.07515	1.51969	-1.01596	-1.1414	0.5693	0.004	0.9006	0.3046	0.793443	0.0363689	0.961763	0.584601
SNOWBALL_019619_st	TMEM178B	5.3695	5.58397	5.69106	5.26882	5.59852	5.58339	5.68782	5.7892	-1.16028	1.34001	1.01054	-1.0728	0.1079	0.004	0.9059	0.4326	0.326222	0.0365365	0.963902	0.697144
SNOWBALL_032174_st	PLCB1	4.63492	4.42148	4.43568	3.97876	4.04286	4.24461	3.98113	3.88047	1.15945	1.37261	-1.15009	1.07227	0.1371	0.0041	0.1584	0.4711	0.375476	0.0366467	0.4082	0.726499
SNOWBALL_038062_st		3.27353	3.28623	3.25999	2.75682	2.99034	3.08982	2.96013	3.03006	-1.00884	1.41732	-1.07139	-1.04967	0.9337	0.0041	0.5174	0.6479	0.975357	0.0367742	0.759242	0.84044
SNOWBALL_001822_s_st	PLS3	8.84782	8.70596	9.12658	8.59	8.99754	8.79433	8.61266	8.48009	1.10333	1.45052	1.15126	1.09625	0.3896	0.0041	0.2233	0.4207	0.661884	0.036948	0.494775	0.687476
SNOWBALL_031725_st	MIB1	6.95437	7.06075	6.99673	7.17064	7.2723	7.41971	7.18972	7.29455	-1.07652	-1.12812	-1.10758	-1.07536	0.0582	0.0042	0.0121	0.0615	0.223118	0.0375025	0.0787861	0.231197
SNOWBALL_005851_st	RIT1	6.79834	6.71486	7.15671	6.82022	7.16779	7.17122	7.09662	7.08655	1.05957	1.26269	-1.00238	1.00701	0.4202	0.0042	0.9733	0.9217	0.687081	0.0375178	0.989938	0.970566
SNOWBALL_016326_st	PTK2B	5.79881	5.70575	5.8815	5.33907	6.05675	5.44874	5.81093	5.22724	1.06663	1.45642	1.52415	1.49868	0.5753	0.0042	0.0018	0.0025	0.797242	0.0375985	0.020345	0.0255516
SNOWBALL_011719_s_st	SLIT2,MIR218-1	4.99234	4.36221	3.23974	4.61046	4.20083	4.16055	4.21007	4.30456	1.5477	-2.58599	1.02831	-1.06768	0.1449	0.0042	0.9232	0.8212	0.387875	0.0376198	0.971154	0.927474
SNOWBALL_028886_st	MBD2	6.10577	6.0893	6.2933	5.91478	6.28935	6.44698	6.08287	6.06104	1.01148	1.30001	-1.11545	1.01525	0.8868	0.0043	0.1851	0.8503	0.955974	0.0380547	0.445827	0.94051
SNOWBALL_005732_st	EYA1	6.00437	6.11219	5.58347	6.13208	5.59653	5.89902	5.48739	6.00506	-1.0776	-1.46268	-1.23327	-1.43164	0.5228	0.0043	0.0855	0.0064	0.763049	0.0381179	0.283375	0.0503156
SNOWBALL_004208_st	NUP188	7.08514	7.07775	6.77726	6.95425	6.87814	6.84414	6.83094	6.79152	1.00514	-1.13053	1.02385	1.0277	0.8914	0.0043	0.5323	0.4699	0.957928	0.0382011	0.76938	0.725663
SNOWBALL_004183_s_st	TNC	12.1486	12.0606	12.1147	11.8362	12.0262	11.875	11.7949	11.6869	1.06288	1.21298	1.11048	1.07774	0.3101	0.0043	0.0905	0.2164	0.590119	0.0384419	0.293401	0.486477
SNOWBALL_005391_st	PKDCC	6.55786	6.57763	7.46458	6.98041	7.79484	7.34062	7.81885	7.47114	-1.01379	1.39878	1.37004	1.27254	0.894	0.0044	0.0067	0.0299	0.958994	0.0385175	0.0521463	0.145128
SNOWBALL_023512_s_st	SLC9A6	6.6708	6.66288	6.7894	6.48291	6.5092	6.74348	6.59018	6.4612	1.0055	1.23669	-1.17632	1.09352	0.9329	0.0044	0.0223	0.1828	0.97506	0.0390265	0.119026	0.442551
SNOWBALL_017832_st	HAT1	6.11116	5.90775	5.75719	5.38173	5.46689	5.29812	5.10049	5.13743	1.15142	1.29725	1.1241	-1.02593	0.0921	0.0044	0.1565	0.7491	0.296531	0.0391178	0.405437	0.893546
SNOWBALL_001778_st	LOC110257802	2.77585	2.65678	2.7176	2.33866	2.34341	2.31305	2.35732	2.30267	1.08603	1.30039	1.02126	1.0386	0.3144	0.0045	0.7945	0.6401	0.594193	0.0392462	0.915235	0.836111
SNOWBALL_013551_st	ARHGAP21	8.98714	8.83141	9.00937	8.75628	8.7563	8.61209	8.62455	8.52349	1.11399	1.19176	1.10512	1.07256	0.059	0.0045	0.0781	0.2057	0.225198	0.0393947	0.268122	0.472956
SNOWBALL_007209_st	MFAP5	7.87945	7.81735	8.49762	7.88457	8.59625	8.18203	7.87339	7.61771	1.04399	1.52949	1.33257	1.19389	0.7423	0.0045	0.0403	0.1874	0.890278	0.0394321	0.176488	0.448915
SNOWBALL_034670_st	ERLIN2	7.25889	7.3019	7.44887	7.13167	7.54887	7.34694	7.59423	7.52843	-1.03027	1.24591	1.15023	1.04666	0.6609	0.0046	0.0522	0.5041	0.84774	0.0398699	0.208105	0.750059
SNOWBALL_005700_st	FABP5	6.14313	6.40679	6.20534	6.74443	6.52367	7.29446	6.56848	6.97905	-1.20052	-1.45306	-1.70621	-1.3292	0.1269	0.0046	0.0002	0.0233	0.358895	0.0400543	0.00462167	0.12268
SNOWBALL_036112_st	PPP1R2	1.30889	0.7944	0.921757	1.49967	0.93432	1.02664	1.32413	1.38374	1.42849	-1.49268	-1.06608	-1.04218	0.0099	0.0046	0.6065	0.7389	0.0682776	0.0402616	0.816546	0.888554
SNOWBALL_010391_st	GTF2A1	6.58593	6.5311	6.62276	6.37773	6.68909	6.67402	6.62715	6.70661	1.03874	1.18512	1.0105	-1.05662	0.4741	0.0048	0.8429	0.3038	0.728671	0.0409857	0.93714	0.583839
SNOWBALL_026166_st	TNRC6B	7.41654	7.17126	6.9494	5.8005	6.97499	6.65218	6.80868	6.46239	1.18533	2.21745	1.25077	1.27129	0.4944	0.0048	0.371	0.3382	0.743214	0.0410151	0.6461	0.616412
SNOWBALL_023817_s_st	FERMT1	7.33068	6.60365	6.82803	6.0035	6.23157	6.06714	6.01763	5.48673	1.65523	1.77096	1.12073	1.44484	0.0107	0.0048	0.523	0.0511	0.0722986	0.0410737	0.763147	0.205429
SNOWBALL_027386_st	FOXF1	5.67974	5.5115	5.64031	5.14501	5.07602	4.89963	4.95602	4.9128	1.12369	1.40961	1.13006	1.03041	0.2827	0.0048	0.2608	0.7788	0.562187	0.0411926	0.538674	0.907611
SNOWBALL_026596_st	ATM	4.41121	4.90171	5.35737	4.26283	4.95019	5.25663	4.66434	3.67741	-1.40493	2.13545	-1.23665	1.98197	0.1623	0.0048	0.3737	0.0095	0.413796	0.041472	0.648487	0.0663133
SNOWBALL_046527_st		3.78993	3.80059	3.95637	3.38121	3.81845	3.76872	3.71025	3.95887	-1.00742	1.48985	1.03507	-1.18807	0.9524	0.0048	0.7811	0.1768	0.982278	0.0414763	0.908731	0.434312
SNOWBALL_008346_s_st	AXL	8.5441	8.48626	8.62544	8.32929	8.4436	8.22334	8.14126	8.09309	1.0409	1.22786	1.16495	1.03396	0.5327	0.0049	0.0273	0.6025	0.769659	0.041663	0.136349	0.814052
SNOWBALL_033949_st	SYT11	5.53473	5.19839	5.75822	5.04454	5.93277	5.56628	5.70204	5.39203	1.26255	1.63998	1.28921	1.23972	0.1435	0.0049	0.1131	0.1754	0.385604	0.0417555	0.335483	0.432316
SNOWBALL_020833_st	ACSL4	8.96177	8.82482	8.56762	8.29042	8.16412	8.03566	8.07188	7.95678	1.09958	1.21184	1.09312	1.08306	0.1264	0.0049	0.1499	0.1941	0.357944	0.0417697	0.395344	0.457886
SNOWBALL_025844_st	LOC102159087	8.62779	8.65352	8.77308	8.5648	8.75094	8.77063	8.72083	8.64421	-1.01799	1.15531	-1.01374	1.05455	0.6921	0.0049	0.7616	0.2473	0.864701	0.0417743	0.899533	0.52362
SNOWBALL_028073_st	FAM171A1	8.33103	8.23125	8.26289	7.98035	8.16636	8.09367	8.07348	7.94078	1.07161	1.21633	1.05167	1.09634	0.2663	0.0049	0.4137	0.145	0.544643	0.041896	0.681886	0.388013
SNOWBALL_046524_st	EXT1	5.83962	5.46237	5.66582	4.82909	5.69536	5.44998	6.04036	5.41552	1.29886	1.786	1.18541	1.54204	0.1612	0.0049	0.3536	0.0271	0.412211	0.0421228	0.630474	0.135593
SNOWBALL_010447_st	AREL1	7.88939	7.65904	8.01265	7.76056	8.06228	7.96057	8.18071	7.9973	1.17312	1.19093	1.07304	1.13557	0.009	0.005	0.2078	0.0308	0.0639055	0.0423943	0.475412	0.148091
SNOWBALL_013818_st	MTRF1	5.58922	5.66562	5.38494	5.66743	5.5537	5.67616	5.38028	5.61443	-1.05438	-1.21629	-1.08859	-1.17622	0.3928	0.005	0.1783	0.016	0.664666	0.0427803	0.436348	0.0952235
SNOWBALL_013334_st	LOC110258604	8.35828	8.41253	8.14025	8.32799	8.07151	8.1661	8.12673	8.11679	-1.03832	-1.13898	-1.06776	1.00691	0.3622	0.0051	0.1215	0.8657	0.638278	0.0428944	0.349698	0.94719
SNOWBALL_005509_st	CLIP4	8.76925	8.58492	8.40757	8.13509	8.05884	7.93028	7.78499	7.7391	1.13629	1.20788	1.0932	1.03232	0.0435	0.0051	0.1458	0.5928	0.185358	0.0432539	0.389195	0.808008
SNOWBALL_025886_s_st	EIF4H	8.97018	8.94379	8.84695	8.68524	8.74823	8.75767	8.64583	8.78948	1.01846	1.11861	-1.00656	-1.1047	0.6045	0.0052	0.8525	0.011	0.815229	0.0434442	0.941479	0.0735333
SNOWBALL_037165_st	CYLD	6.28675	6.4249	6.7362	6.25946	6.66003	6.84111	7.02407	6.97616	-1.10049	1.3916	-1.13373	1.03377	0.3622	0.0052	0.2366	0.7491	0.63824	0.0434602	0.510955	0.893561
SNOWBALL_017916_st	SAP130	8.04629	7.95386	7.96032	7.77964	7.86053	7.79959	7.8184	7.78902	1.06616	1.13342	1.04315	1.02057	0.1176	0.0052	0.2916	0.6064	0.34324	0.0437123	0.571532	0.816452
SNOWBALL_002592_st	USP3	6.12174	6.25057	5.79937	6.25723	6.16988	6.25299	6.24712	6.047	-1.09341	-1.3735	-1.0593	1.14879	0.3767	0.0052	0.5656	0.1769	0.651038	0.0438142	0.791079	0.434456
SNOWBALL_025403_st	SGK1	8.03917	7.57009	7.66798	6.99819	6.30541	5.55241	6.15638	5.41987	1.38423	1.59084	1.68529	1.66614	0.038	0.0052	0.0022	0.0027	0.169918	0.0439781	0.0239449	0.0270083
SNOWBALL_033047_st		5.87064	5.61033	5.7449	5.21878	5.52464	5.60903	5.53695	5.27807	1.19774	1.44005	-1.06024	1.19655	0.1298	0.0053	0.6117	0.1317	0.363614	0.0440414	0.81957	0.3668
SNOWBALL_028303_st	LOC100513133	10.9906	10.8481	10.9267	10.5361	10.6159	10.3916	10.2888	10.072	1.1038	1.31095	1.16823	1.16219	0.2565	0.0053	0.0825	0.0923	0.533822	0.0441965	0.277098	0.296944
SNOWBALL_006848_st	TIMP3	10.2438	9.96881	9.40231	9.00713	9.07201	8.73688	9.31176	9.03475	1.21	1.31511	1.26149	1.21168	0.0393	0.0053	0.0147	0.0381	0.173757	0.0442833	0.0897074	0.1702
SNOWBALL_025793_s_st	PSMG1	7.04278	6.94003	7.03365	6.69912	7.15506	7.32453	7.36703	7.21104	1.07382	1.26097	-1.12464	1.11419	0.3367	0.0053	0.1219	0.1522	0.614987	0.0442888	0.350465	0.398837
SNOWBALL_035303_st	VAPA	5.03146	4.87078	5.22571	4.79183	4.85616	4.76216	4.74836	4.77085	1.11782	1.35086	1.06732	-1.01571	0.2501	0.0053	0.4951	0.8694	0.526731	0.0444337	0.743686	0.948835
SNOWBALL_021346_s_st	ANTXR2	8.01413	8.08891	8.45473	8.1481	8.66228	8.55936	8.70826	8.52232	-1.0532	1.23681	1.07394	1.13755	0.4434	0.0053	0.2955	0.0684	0.70572	0.0444533	0.575513	0.247083
SNOWBALL_004062_s_st	TNC	11.6981	11.6981	11.6769	11.4414	11.4917	11.3462	11.2281	11.1787	1.00003	1.17726	1.10605	1.0349	0.9995	0.0053	0.064	0.5079	0.999837	0.0444802	0.236966	0.752659
SNOWBALL_005872_st	UBXN2B	5.44678	5.27538	4.88457	5.41163	5.48944	5.64279	5.41866	5.43849	1.12616	-1.44099	-1.11215	-1.01384	0.3108	0.0054	0.363	0.9051	0.590818	0.0446832	0.638881	0.963614
SNOWBALL_031279_st	ZZEF1	5.85171	5.90833	5.97768	5.62923	5.91102	6.01731	5.95605	5.88082	-1.04002	1.2732	-1.07646	1.05352	0.6086	0.0054	0.3414	0.4977	0.817776	0.0449463	0.61946	0.745453
SNOWBALL_014643_st	PHB	8.24527	8.15547	7.99765	8.23777	8.09398	7.94586	8.06538	8.04155	1.06422	-1.1811	1.10813	1.01665	0.2484	0.0055	0.0657	0.7547	0.524883	0.0456958	0.240941	0.896283
SNOWBALL_019893_st	FLNC,CCDC136	8.16454	8.21239	8.54535	8.18838	8.26448	7.95248	7.85393	7.78836	-1.03372	1.28073	1.24143	1.0465	0.6739	0.0056	0.013	0.5652	0.854896	0.0460849	0.0825012	0.7909
SNOWBALL_030732_st	ZGPAT	4.27053	3.86979	3.92127	3.34911	3.22492	3.62824	3.40061	3.49329	1.32019	1.48676	-1.32255	-1.06634	0.0398	0.0056	0.0387	0.6119	0.17505	0.0462112	0.171903	0.819692
SNOWBALL_018811_st	ADAM19	7.43522	7.32823	7.91555	7.55994	7.94004	7.64826	7.726	7.3017	1.07698	1.27952	1.22415	1.34193	0.3508	0.0056	0.0185	0.0015	0.628088	0.0462827	0.105086	0.018142
SNOWBALL_012757_st	EPDR1	7.71696	7.72185	7.77904	7.39635	7.47773	7.0667	7.08035	6.77151	-1.00339	1.30377	1.32963	1.23871	0.968	0.0057	0.0034	0.0203	0.98791	0.0464162	0.0325731	0.111697
SNOWBALL_009344_st	SZRD1	8.15835	8.12488	8.17679	8.01958	8.07774	7.98438	8.05318	8.02025	1.02347	1.11512	1.06685	1.02309	0.5068	0.0057	0.0764	0.5135	0.75197	0.046569	0.264483	0.75656
SNOWBALL_004866_st	ASPN	8.34004	9.03454	8.97318	9.70535	9.56151	10.2762	9.44627	10.0721	-1.61832	-1.66114	-1.64108	-1.54311	0.008	0.0057	0.0067	0.015	0.0592709	0.0466229	0.0521217	0.0907899
SNOWBALL_010439_st	LTBP2	4.34259	3.94545	3.97893	3.05916	4.40828	3.62186	4.09399	3.56887	1.31689	1.89181	1.72479	1.43906	0.1879	0.0057	0.015	0.0877	0.44964	0.0468502	0.0910432	0.287765
SNOWBALL_034488_st	MSN	9.95106	9.91928	10.0496	9.77411	9.99196	9.83881	9.73884	9.66026	1.02227	1.21042	1.112	1.05598	0.7182	0.0058	0.0957	0.3772	0.878089	0.0469449	0.303739	0.651503
SNOWBALL_029700_st	SLC38A1	5.94733	5.93897	5.78627	5.30465	5.65232	5.608	5.31357	5.21932	1.00581	1.39632	1.03119	1.06751	0.9566	0.0058	0.7734	0.5421	0.983779	0.0470227	0.905007	0.776045
SNOWBALL_022917_s_st	PRKCI	7.53063	7.42368	7.69188	7.48246	7.64646	7.63717	7.53659	7.48757	1.07695	1.15623	1.00646	1.03456	0.1248	0.0059	0.8899	0.4687	0.355361	0.0478746	0.957257	0.724702
SNOWBALL_024666_s_st	ANXA8	10.2859	10.3877	9.87999	10.2676	9.87124	10.1022	9.39897	9.82203	-1.07315	-1.30826	-1.17359	-1.34077	0.4171	0.0059	0.0772	0.0032	0.684633	0.0479684	0.266187	0.0310351
SNOWBALL_017187_s_st	PDCD11	5.60226	5.53486	5.47368	5.11719	5.25336	5.36112	5.41043	5.2954	1.04782	1.28031	-1.07755	1.083	0.5578	0.006	0.3527	0.3221	0.785964	0.0482163	0.629806	0.601573
SNOWBALL_016005_s_st	TMEM45A	9.10814	8.98967	9.6668	9.23781	9.83606	9.70696	9.90252	9.71546	1.08558	1.3463	1.09362	1.13844	0.3948	0.006	0.3548	0.1863	0.666425	0.0482165	0.631576	0.447466
SNOWBALL_009886_s_st	DNPH1	6.08412	6.17894	5.94266	6.29945	5.95984	5.97702	6.02839	6.00339	-1.06794	-1.28057	-1.01198	1.01748	0.4125	0.006	0.8807	0.8272	0.680869	0.0482406	0.953526	0.930279
SNOWBALL_022383_st	ANTXR2	7.88159	7.90216	8.24172	7.95176	8.30599	8.21287	8.30561	8.17093	-1.01436	1.22261	1.06667	1.09785	0.8252	0.006	0.3247	0.1611	0.929384	0.0483868	0.604037	0.411963
SNOWBALL_034362_st	LAMC1	10.2397	10.1821	10.4183	10.2156	10.4311	10.3994	10.4247	10.3173	1.04072	1.15087	1.02217	1.07734	0.3831	0.0061	0.6289	0.1136	0.65636	0.0488858	0.829652	0.336351
SNOWBALL_010661_st		11.272	11.2804	11.4497	11.2319	11.448	11.3048	11.3751	11.2842	-1.00583	1.16292	1.10437	1.06499	0.9049	0.0062	0.0546	0.207	0.963539	0.049204	0.21427	0.474561
SNOWBALL_011451_s_st	ADGRL3	5.93278	5.82319	6.08921	5.54879	5.4523	5.29597	5.08596	4.9737	1.07892	1.45439	1.11445	1.08092	0.5317	0.0062	0.3753	0.5219	0.768971	0.0492077	0.649862	0.762362
SNOWBALL_017163_s_st	ALDH18A1	7.53143	7.50279	7.41402	7.58101	7.44971	7.53767	7.53004	7.40111	1.02005	-1.12272	-1.06286	1.09349	0.5962	0.0062	0.1164	0.027	0.8101	0.0492478	0.341091	0.1355
SNOWBALL_018782_s_st	C1QTNF2	5.41933	5.67696	5.43893	5.16	5.55055	5.24148	5.38426	5.43283	-1.19552	1.2133	1.2389	-1.03423	0.0103	0.0062	0.003	0.5914	0.0703684	0.0496175	0.0298003	0.807174
SNOWBALL_018012_st	TTN	4.53444	4.74888	4.53989	4.94151	4.64329	6.16154	4.68882	5.79961	-1.16025	-1.32099	-2.86445	-2.15964	0.2612	0.0444	< 0.001	< 0.001	0.53904	0.187783	3.88339e-05	0.000659557
SNOWBALL_014981_st	MYH2	4.22884	4.49103	4.23178	4.49563	4.90182	6.00284	4.43205	5.78838	-1.1993	-1.20068	-2.14507	-2.56033	0.1104	0.1084	< 0.001	< 0.001	0.330768	0.326995	0.000158087	2.22926e-05
SNOWBALL_018170_s_st	MYL1	5.15814	5.15926	5.95708	5.61512	6.39529	7.19714	6.3432	7.31009	-1.00077	1.26748	-1.74333	-1.95463	0.9927	0.0117	< 0.001	< 0.001	0.997268	0.0767819	0.00027557	4.9272e-05
SNOWBALL_011826_st	MYOZ2	2.01913	2.04243	2.08267	2.4032	2.22617	3.38801	2.02177	2.9735	-1.01628	-1.24879	-2.23742	-1.9342	0.9108	0.1371	< 0.001	0.0003	0.965945	0.375471	0.00110112	0.00505874
SNOWBALL_045136_st	SPTBN1	8.21422	8.21676	8.2774	8.23414	8.34626	8.0528	8.08886	8.04713	-1.00176	1.03044	1.22557	1.02935	0.963	0.432	< 0.001	0.4481	0.986084	0.696643	0.00148683	0.709289
SNOWBALL_022356_st	FGD5	2.78112	2.60324	2.45578	2.91742	2.42187	3.21623	2.61723	2.88757	1.13123	-1.37711	-1.73431	-1.20609	0.2597	0.0079	< 0.001	0.0948	0.537395	0.0586038	0.00214	0.301891
SNOWBALL_018060_s_st	SERPINE2	10.5333	10.4205	10.1559	9.98153	9.71446	9.38201	9.22375	9.03488	1.08127	1.12848	1.25915	1.13987	0.1068	0.0177	0.0001	0.0113	0.324148	0.101842	0.00278946	0.0748953
SNOWBALL_023217_st	FABP4	3.40632	3.5986	3.7117	4.34852	4.06497	5.11377	3.98817	4.8298	-1.14257	-1.5549	-2.06881	-1.79207	0.3786	0.0085	0.0001	0.0011	0.652596	0.0615477	0.00323883	0.0143564
SNOWBALL_009000_st	ZCCHC11	7.18315	7.11056	7.15749	7.12594	7.15178	7.40462	7.24075	7.36575	1.0516	1.02211	-1.19154	-1.09051	0.1835	0.5541	0.0002	0.0293	0.443555	0.783691	0.00376425	0.142927
SNOWBALL_019717_st	CHCHD3	7.65142	7.68713	7.6119	7.74553	7.49888	7.76585	7.5361	7.66972	-1.02506	-1.09705	-1.20328	-1.09704	0.5367	0.0311	0.0002	0.0311	0.772522	0.148956	0.0045239	0.148996
SNOWBALL_037576_st		5.56122	5.50434	5.54157	5.54769	5.64081	6.13079	5.60448	6.0539	1.04021	-1.00425	-1.40442	-1.3655	0.5933	0.9539	0.0002	0.0005	0.808311	0.982787	0.00471109	0.00852136
SNOWBALL_011710_s_st	SPP1	9.64522	9.83379	9.68038	9.93239	9.75439	10.4476	9.48871	10.2566	-1.13964	-1.19086	-1.61688	-1.70282	0.2262	0.112	0.0003	0.0001	0.498467	0.333492	0.0052198	0.00245943
SNOWBALL_011419_st	GUF1	6.50655	6.37859	6.08853	6.07078	5.8709	6.16267	6.09999	6.06579	1.09274	1.01238	-1.22414	1.02399	0.0673	0.7889	0.0004	0.6071	0.244641	0.912514	0.00658783	0.816862
SNOWBALL_009696_st	CARMIL1	6.57116	6.54592	6.6112	6.72942	6.58264	6.85827	6.60841	6.68201	1.01765	-1.08539	-1.21052	-1.05234	0.6875	0.073	0.0004	0.2496	0.862131	0.257353	0.00660418	0.526244
SNOWBALL_006207_st	SLC25A24	8.09805	7.98975	7.56337	7.66122	7.25695	7.55667	6.97668	7.2458	1.07795	-1.07018	-1.2309	-1.20507	0.1296	0.1681	0.0004	0.0011	0.363369	0.421992	0.00713924	0.0142127
SNOWBALL_000787_st	NOV	6.71544	6.77556	7.04545	7.75957	7.189	8.26506	8.25938	9.0878	-1.04255	-1.64047	-2.10827	-1.77574	0.8088	0.01	0.0004	0.0037	0.9217	0.0687664	0.00733066	0.0345337
SNOWBALL_011795_st	MYOZ2	5.08954	5.89127	5.58166	5.48666	5.22504	6.50013	4.91832	6.36107	-1.74319	1.06807	-2.42014	-2.71839	0.0137	0.7471	0.0004	0.0001	0.0855279	0.892598	0.0073392	0.0030425
SNOWBALL_036183_st	LOC102161056	6.49577	6.39597	6.10006	5.90868	5.83494	6.43538	5.68691	6.10259	1.07162	1.14185	-1.51618	-1.33393	0.4758	0.1805	0.0005	0.0078	0.729917	0.439402	0.00745491	0.057849
SNOWBALL_010493_st	GPHN	6.76369	6.85173	6.75064	6.75425	6.6904	6.96241	6.87793	6.63959	-1.06293	-1.00251	-1.20749	1.17963	0.1783	0.9546	0.0005	0.0015	0.436334	0.983018	0.00796488	0.0181377
SNOWBALL_033271_st	SOX11	2.1833	2.24545	2.19021	2.75329	2.04013	3.14835	2.09071	2.45812	-1.04402	-1.47742	-2.1558	-1.29004	0.8106	0.0422	0.0005	0.169	0.922596	0.181699	0.00802164	0.423236
SNOWBALL_008723_st	DSC2	6.69628	6.85203	6.27878	6.4306	5.03761	5.59496	3.99721	4.34682	-1.114	-1.11097	-1.47156	-1.27421	0.2427	0.2543	0.0005	0.0151	0.518276	0.531432	0.00807872	0.0912071
SNOWBALL_016402_s_st	RP1L1	5.72845	5.63739	5.5728	5.48625	5.6464	5.26209	5.52924	5.53047	1.06515	1.06183	1.30524	-1.00085	0.3204	0.3443	0.0005	0.9891	0.600023	0.622086	0.00823921	0.995917
SNOWBALL_039160_st		2.99905	2.99465	3.20849	3.19229	3.08221	3.55219	3.29613	3.4782	1.00306	1.01129	-1.3851	-1.13451	0.9687	0.885	0.0006	0.1183	0.988219	0.955232	0.00912968	0.344387
SNOWBALL_002965_st	MLLT3	4.35751	4.41859	4.55445	4.60407	4.61941	5.33587	4.63292	5.13811	-1.04324	-1.03499	-1.64314	-1.41931	0.724	0.7741	0.0007	0.009	0.880969	0.905368	0.00979542	0.0639861
SNOWBALL_018654_st	LOC100737060	4.16217	4.1839	3.82431	4.06256	3.37557	3.93633	3.34012	3.45656	-1.01518	-1.17957	-1.47505	-1.08406	0.8734	0.0949	0.0007	0.3985	0.950435	0.30222	0.0103814	0.669342
SNOWBALL_030196_st	MEX3B	4.69216	4.62562	4.81102	5.02894	4.75675	5.12256	4.84553	4.90051	1.0472	-1.16306	-1.2886	-1.03884	0.4612	0.025	0.0008	0.5415	0.719155	0.128485	0.0107994	0.775593
SNOWBALL_001544_st	SPP1	8.97109	8.81705	8.76358	9.11018	8.95868	9.83821	8.8327	9.86523	1.11268	-1.27157	-1.83978	-2.0456	0.4792	0.1225	0.0008	0.0002	0.732239	0.351505	0.0110282	0.00367972
SNOWBALL_022524_st	FABP4	3.31835	3.50588	3.48509	3.86271	4.03768	5.08962	3.94684	4.6844	-1.13881	-1.2992	-2.07331	-1.66735	0.4722	0.1575	0.0008	0.0105	0.727236	0.406944	0.0111425	0.071403
SNOWBALL_004580_st	TPST1	6.67908	6.83539	6.91831	7.23896	7.23744	7.70742	7.532	7.8935	-1.11443	-1.2489	-1.38509	-1.28476	0.1891	0.0125	0.0008	0.0059	0.451269	0.0803021	0.0112672	0.0478577
SNOWBALL_024331_s_st	TRIAP1	6.59173	6.54057	6.44108	6.54125	6.19218	6.50802	6.5538	6.49552	1.0361	-1.0719	-1.24473	1.04122	0.5167	0.2125	0.0008	0.461	0.758748	0.481292	0.0117806	0.719028
SNOWBALL_021523_s_st	FJX1	6.11949	6.23797	6.02618	6.01729	5.93206	6.54327	5.8156	6.1986	-1.08559	1.00618	-1.52754	-1.30405	0.4396	0.9533	0.0009	0.0209	0.70258	0.982568	0.011869	0.113802
SNOWBALL_007302_s_st	AVPR1A	1.89398	1.83865	2.01895	1.72742	2.08604	1.67107	1.89964	2.06087	1.03909	1.22393	1.33327	-1.11824	0.5935	0.0111	0.0009	0.132	0.808406	0.074155	0.0119467	0.367304
SNOWBALL_038445_st	NES	6.14723	6.2357	5.98563	6.19048	5.82004	6.26979	5.4101	6.03633	-1.06324	-1.15256	-1.3658	-1.54352	0.4344	0.0819	0.0009	< 0.001	0.698501	0.275803	0.012105	0.00109791
SNOWBALL_010366_st	LTBP2	7.87084	8.09858	8.30495	8.02006	8.26405	7.84158	7.72788	7.35536	-1.17101	1.21832	1.34022	1.29461	0.0443	0.0148	0.0009	0.0026	0.187581	0.0902674	0.0126195	0.0262396
SNOWBALL_005569_st	WISP1	7.472	7.83355	8.15463	8.65044	8.38038	9.07261	8.43841	9.02409	-1.28481	-1.41012	-1.61579	-1.50075	0.0563	0.0123	0.0012	0.0042	0.218452	0.0793178	0.0148899	0.0376068
SNOWBALL_011685_st	EMCN	3.35934	3.37457	2.83035	3.74811	3.08786	4.52683	3.1319	4.18282	-1.01061	-1.88918	-2.71129	-2.07186	0.9674	0.0235	0.0012	0.0112	0.987665	0.123087	0.0152026	0.0743477
SNOWBALL_026797_st	NOTCH1	5.12514	5.45661	5.254	5.24293	5.20558	5.76395	5.39146	5.53469	-1.2583	1.0077	-1.47261	-1.10437	0.0359	0.94	0.0014	0.337	0.163735	0.977573	0.0168928	0.61534
SNOWBALL_022089_st	LOC110258338	6.10759	6.32103	5.83119	6.13426	5.50827	6.07964	5.3506	5.43105	-1.15945	-1.23377	-1.48593	-1.05735	0.1709	0.0587	0.0015	0.5964	0.425998	0.224269	0.017422	0.810173
SNOWBALL_025136_s_st	GPC6	5.34241	5.24444	5.6928	5.5411	5.80706	5.44064	5.86705	5.60479	1.07026	1.11088	1.28915	1.19936	0.3211	0.1324	0.0015	0.0145	0.600619	0.367845	0.0176371	0.0888784
SNOWBALL_020973_s_st	IGFBP2	9.73064	9.61322	9.96275	9.48215	9.77368	9.18167	9.64464	9.10238	1.0848	1.39532	1.50734	1.45625	0.459	0.0068	0.0015	0.0029	0.717452	0.0526436	0.0177414	0.0289901
SNOWBALL_027290_st	ENDOD1	4.91866	4.99148	4.94997	5.26946	5.21111	5.72421	4.94918	5.3244	-1.05176	-1.24789	-1.42711	-1.29704	0.5957	0.0303	0.0015	0.0131	0.809741	0.146483	0.0180288	0.0829678
SNOWBALL_022823_s_st	ETS1	7.78475	7.76233	7.38583	7.40342	7.0541	7.40151	6.88637	7.15604	1.01566	-1.01227	-1.27227	-1.20554	0.8095	0.8499	0.0016	0.0095	0.922091	0.940343	0.0185352	0.0663248
SNOWBALL_001250_st	BAG6	7.76734	7.726	7.40701	7.44972	7.4224	7.06822	7.22416	7.19932	1.02907	-1.03005	1.27826	1.01737	0.6669	0.6566	0.0017	0.7956	0.850944	0.845312	0.0197335	0.915751
SNOWBALL_025049_s_st	PLXND1	6.03727	6.15348	6.17303	6.31425	6.17892	6.50886	6.32568	6.4521	-1.08389	-1.10283	-1.25696	-1.09158	0.2064	0.1291	0.0018	0.1712	0.473765	0.362467	0.0202673	0.426386
SNOWBALL_005297_st	B3GNT2	9.15991	9.00688	8.80219	8.91534	8.57465	8.87442	8.5392	8.73441	1.1119	-1.08159	-1.23095	-1.1449	0.0747	0.1778	0.0018	0.0271	0.261	0.43564	0.0204087	0.13576
SNOWBALL_004473_st	CRYM	3.74707	3.56286	4.31172	3.66756	4.11692	3.15646	3.63937	3.19259	1.13619	1.56283	1.94593	1.363	0.485	0.0237	0.0018	0.1022	0.736471	0.123865	0.0206361	0.315661
SNOWBALL_017899_st	DLX2	5.74621	5.81944	6.40652	6.0244	7.06943	6.33603	7.23882	6.5067	-1.05207	1.30325	1.66256	1.66108	0.7147	0.07	0.0018	0.0019	0.876288	0.250699	0.0206746	0.0208779
SNOWBALL_019514_st	ELMO2	7.25299	7.28695	7.38788	7.46633	7.7142	7.46933	7.55569	7.57991	-1.02382	-1.05588	1.18499	-1.01693	0.6133	0.2512	0.0019	0.718	0.820575	0.528011	0.0209825	0.877996
SNOWBALL_035395_st	ZNF623	4.40479	4.35908	4.64809	4.5963	4.71743	4.17536	4.64935	4.55394	1.03219	1.03655	1.45606	1.06837	0.7591	0.7283	0.0019	0.5241	0.898373	0.883184	0.0214987	0.763914
SNOWBALL_002305_st	SOGA3,KIAA0408	3.93959	3.85415	4.10147	4.1001	3.77219	4.24804	3.63659	4.01652	1.06101	1.00095	-1.39074	-1.30128	0.5166	0.9917	0.002	0.0094	0.758683	0.996901	0.0216908	0.0661113
SNOWBALL_026255_s_st	STRAP	7.77844	7.78504	7.59714	7.59751	7.66328	7.8543	7.87664	7.83484	-1.00459	-1.00026	-1.14157	1.0294	0.9002	0.9943	0.002	0.4317	0.961596	0.997845	0.0219649	0.696377
SNOWBALL_043489_st	FAT4	5.63128	5.62885	5.61275	5.69426	5.3937	5.84337	5.53601	5.69266	1.00169	-1.05813	-1.36572	-1.1147	0.9843	0.514	0.002	0.2179	0.994102	0.756879	0.0221129	0.488224
SNOWBALL_016061_st	LSG1	7.49938	7.43521	7.27914	7.44571	7.23432	7.49483	7.42662	7.50235	1.04548	-1.12239	-1.1979	-1.0539	0.3784	0.0318	0.002	0.3008	0.65249	0.151176	0.0222456	0.581009
SNOWBALL_000040_s_st	ACTC1	4.88155	4.80459	4.74099	5.13375	4.73292	5.67183	4.6499	5.59834	1.0548	-1.3129	-1.91707	-1.92979	0.7676	0.1446	0.0021	0.0019	0.902309	0.387413	0.0226597	0.0213946
SNOWBALL_025871_st	CNOT10	6.27077	6.16699	6.10119	6.11683	6.0458	6.30464	6.18138	6.1349	1.07459	-1.0109	-1.19652	1.03274	0.1648	0.8291	0.0022	0.5236	0.417409	0.931123	0.0239367	0.76357
SNOWBALL_011907_st	RPS3A	5.0592	4.73856	4.80959	3.51951	4.96898	3.44775	4.30273	4.49887	1.24889	2.44542	2.87036	-1.14563	0.4575	0.0074	0.0023	0.6477	0.716432	0.0560159	0.0246344	0.840316
SNOWBALL_010692_st	COQ6	6.87455	6.82523	6.79876	6.77414	6.86225	6.52576	6.85178	6.62104	1.03477	1.01721	1.26268	1.17343	0.6048	0.7955	0.0024	0.0251	0.815436	0.91573	0.0250051	0.129035
SNOWBALL_022983_st	CD82	6.2665	6.47812	5.8141	6.44975	5.62559	6.37965	5.25463	6.01663	-1.15799	-1.55363	-1.68652	-1.69583	0.3287	0.008	0.0025	0.0023	0.607806	0.0591819	0.0254695	0.0240541
SNOWBALL_045763_st		2.84127	2.89944	2.93929	2.99385	2.68584	3.10688	2.79821	2.89753	-1.04114	-1.03854	-1.3389	-1.07126	0.6276	0.6489	0.0025	0.4109	0.828875	0.840999	0.0258364	0.679534
SNOWBALL_016247_st	LOC100524905	1.1444	1.28116	1.1071	1.13714	1.34126	1.00509	1.13199	1.27257	-1.09943	-1.02104	1.2624	-1.10235	0.1652	0.7535	0.0025	0.1544	0.417892	0.895697	0.0260342	0.402163
SNOWBALL_004986_st	LOXL3	7.00487	6.8764	6.80962	6.53692	6.47065	6.04973	6.20424	5.97473	1.09313	1.20807	1.33879	1.17244	0.292	0.0344	0.0026	0.0693	0.571903	0.159047	0.0262218	0.249175
SNOWBALL_031138_st	LTBP2	8.2455	8.24254	8.60757	8.34747	8.76409	8.31953	8.36097	7.80648	1.00205	1.19756	1.3609	1.46865	0.9814	0.054	0.0026	0.0004	0.992942	0.21263	0.0268502	0.00701235
SNOWBALL_027305_st		2.79126	2.87732	2.7851	3.04138	3.16634	2.6174	2.9539	2.83751	-1.06147	-1.19439	1.46301	1.08402	0.5854	0.1168	0.0027	0.4624	0.803535	0.341778	0.0269951	0.720078
SNOWBALL_002258_s_st	RARS2	5.03777	5.12441	4.95503	4.87261	4.85587	5.21866	4.73729	4.89459	-1.0619	1.05879	-1.28591	-1.1152	0.4093	0.432	0.0027	0.1435	0.678261	0.696643	0.0271277	0.385557
SNOWBALL_011383_st	LIMCH1,LOC110262081	7.01213	7.02342	7.63351	7.45726	7.83993	7.63	7.75234	7.64063	-1.00786	1.12994	1.15663	1.08051	0.8519	0.0092	0.0028	0.0789	0.941201	0.0650202	0.0280126	0.269654
SNOWBALL_007000_s_st	NPFF	4.58545	3.88009	5.00136	4.6634	4.99635	4.09124	4.63467	4.74272	1.63056	1.26397	1.87269	-1.07777	0.0145	0.2077	0.0029	0.6802	0.0889679	0.475284	0.0284499	0.858193
SNOWBALL_005832_st	MPZL1	9.3594	9.34577	9.39329	9.44644	9.36079	9.53777	9.28234	9.27891	1.00949	-1.03753	-1.13052	1.00238	0.7906	0.3076	0.0029	0.9467	0.913265	0.587554	0.0287961	0.980101
SNOWBALL_047460_st	FRMD6	5.43643	5.44481	5.51331	5.59092	5.62646	5.8985	5.78709	5.82817	-1.00583	-1.05527	-1.20752	-1.02889	0.9153	0.3322	0.0029	0.6038	0.967905	0.611006	0.0289718	0.814823
SNOWBALL_005699_st	EYA1	5.21555	5.06958	4.72613	4.90918	4.68832	5.26187	4.46028	4.85591	1.10647	-1.13528	-1.48819	-1.31551	0.3869	0.2811	0.003	0.0283	0.659639	0.560553	0.0294095	0.139645
SNOWBALL_025787_st	INIP	5.87027	5.92627	5.77945	5.95939	6.16605	6.44947	6.23471	6.23534	-1.03958	-1.13283	-1.21707	-1.00043	0.4997	0.0413	0.003	0.9939	0.746901	0.179242	0.0294212	0.997747
SNOWBALL_028259_st		1.47688	1.46654	1.59787	1.55848	2.04585	1.45217	1.63181	1.51888	1.0072	1.02768	1.50909	1.08142	0.9524	0.8202	0.0031	0.517	0.982274	0.927059	0.0299432	0.758975
SNOWBALL_003486_st	GLIPR2	7.77141	7.87815	7.81408	7.97166	8.06293	8.32319	7.95136	8.04113	-1.07679	-1.11541	-1.19769	-1.0642	0.1729	0.0513	0.0031	0.2477	0.428849	0.206012	0.0301545	0.523941
SNOWBALL_004241_st	PDGFA	5.95917	6.10779	6.32827	6.38318	6.54043	6.77478	6.46667	6.64008	-1.10851	-1.0388	-1.17638	-1.12772	0.0424	0.4271	0.0031	0.0204	0.1822	0.692746	0.0301959	0.112179
SNOWBALL_029736_st	NRP2	8.93255	8.85743	9.32812	9.12536	9.32744	9.07376	9.25085	8.97627	1.05345	1.1509	1.19224	1.20964	0.3187	0.0134	0.0031	0.0017	0.598423	0.0844346	0.0303107	0.0195956
SNOWBALL_035365_st	IL1RAP	8.83402	8.58491	8.89758	8.54715	8.52822	8.09338	8.58887	8.02513	1.18847	1.27494	1.35175	1.4781	0.0641	0.0129	0.0031	0.0004	0.237276	0.0821239	0.0304724	0.0063294
SNOWBALL_025003_s_st	CHST15	5.53853	5.78599	5.80517	6.19004	5.7645	6.19138	5.94039	6.20713	-1.18712	-1.30574	-1.34432	-1.20309	0.0615	0.0065	0.0032	0.0457	0.23119	0.051047	0.0306381	0.191131
SNOWBALL_024499_s_st	ARID5B	9.5423	9.44586	9.59218	9.40665	9.47368	9.24554	9.45937	9.25946	1.06914	1.13724	1.17133	1.14863	0.1649	0.0129	0.0033	0.0082	0.417608	0.0819279	0.031896	0.060023
SNOWBALL_003899_st	PCSK6	6.94676	7.08443	7.44428	7.2007	7.45199	7.14558	6.97732	6.90965	-1.10013	1.18392	1.23663	1.04802	0.1508	0.0168	0.004	0.469	0.396676	0.0982038	0.0362213	0.724931
SNOWBALL_013418_st	C10H9orf72	6.76158	6.7206	6.68183	6.74335	6.72	7.02751	6.82735	6.79988	1.02881	-1.04357	-1.23757	1.01922	0.6608	0.5116	0.004	0.7682	0.847641	0.755169	0.0363883	0.902555
SNOWBALL_014260_st	TTYH2	6.98213	7.193	7.41934	7.62992	7.48879	7.79969	7.56717	7.68068	-1.15739	-1.15715	-1.24049	-1.08186	0.0374	0.0376	0.0041	0.2395	0.168163	0.168846	0.0368857	0.514454
SNOWBALL_011298_st	BST1	2.6512	2.93863	2.73635	2.77781	2.48005	3.09526	2.53372	2.55239	-1.22047	-1.02916	-1.53177	-1.01302	0.1383	0.8248	0.0042	0.9206	0.377519	0.929192	0.0373137	0.97009
SNOWBALL_006453_st	CDC42SE1	6.80396	7.00233	6.79285	6.93546	6.69122	7.14225	6.50599	6.50448	-1.1474	-1.1039	-1.36702	1.00105	0.1631	0.3088	0.0043	0.9912	0.414863	0.588682	0.0381124	0.996756
SNOWBALL_019847_s_st	LOC100511984	6.95755	6.76187	6.53735	6.65775	6.40225	6.68396	6.22771	6.16276	1.14526	-1.08704	-1.21563	1.04605	0.0349	0.1754	0.0044	0.4555	0.160852	0.432288	0.0385298	0.714809
SNOWBALL_013876_st	NUFIP1	5.92428	5.75937	5.94076	5.85568	5.61041	5.96168	5.84964	5.89399	1.12109	1.06075	-1.27568	-1.03122	0.1408	0.4357	0.0045	0.6824	0.38136	0.699494	0.039536	0.859382
SNOWBALL_013190_x_st	TAF1D	6.85714	6.5119	6.18496	6.44575	5.54544	6.15153	5.56218	5.75606	1.27036	-1.19813	-1.52213	-1.14383	0.0785	0.1748	0.0045	0.3068	0.268866	0.431553	0.039589	0.586838
SNOWBALL_020413_st	HCFC1	6.68749	6.68102	6.42005	6.37678	6.45986	6.23542	6.31848	6.32609	1.00449	1.03045	1.16832	-1.00528	0.9254	0.5337	0.0045	0.9124	0.971988	0.770297	0.0396359	0.966634
SNOWBALL_012779_s_st	APLP2	9.0314	9.10178	9.28069	9.07603	9.23545	9.01115	9.1787	9.01542	-1.05	1.15241	1.16821	1.11983	0.3163	0.0083	0.0046	0.0289	0.596053	0.0607861	0.0397659	0.141798
SNOWBALL_015864_st	APP	4.18633	4.02279	4.74288	4.87489	4.13204	5.43861	4.94003	4.72757	1.12003	-1.09582	-2.47352	1.15866	0.6861	0.744	0.0046	0.6002	0.861442	0.891135	0.0402792	0.812591
SNOWBALL_016936_s_st	ARID5B	9.81807	9.72927	9.84819	9.64662	9.74499	9.52838	9.74946	9.53477	1.06349	1.14995	1.162	1.16045	0.1996	0.0078	0.0049	0.0052	0.464964	0.0581798	0.0417676	0.04359
SNOWBALL_001509_s_st	ARG2	5.5377	5.98332	4.9023	5.20528	4.65122	5.37008	4.29488	4.49841	-1.3619	-1.23369	-1.64588	-1.15151	0.0603	0.1884	0.0049	0.3697	0.228268	0.450221	0.041995	0.644891
SNOWBALL_020082_st		4.35814	4.26053	4.19032	4.29348	3.93674	4.20698	4.41144	4.20144	1.07	-1.07412	-1.20601	1.15669	0.2568	0.2318	0.005	0.0223	0.5341	0.505131	0.0422621	0.118897
SNOWBALL_020450_st	INTS6L	5.64565	5.64498	5.7216	5.86834	5.75561	6.1306	5.73253	5.93928	1.00047	-1.10706	-1.29683	-1.15409	0.9954	0.2214	0.005	0.0919	0.998345	0.492563	0.0425651	0.296302
SNOWBALL_025434_st	HS2ST1	3.82202	3.70566	3.85385	3.80318	3.85179	4.29797	4.13551	4.11269	1.08399	1.03575	-1.36244	1.01595	0.4091	0.7168	0.005	0.87	0.678132	0.877411	0.0426022	0.94902
SNOWBALL_017271_s_st	BMS1	6.87288	6.84385	6.718	6.85873	6.72079	6.96926	6.89819	6.83797	1.02033	-1.10246	-1.18794	1.04262	0.7093	0.0844	0.005	0.4427	0.873489	0.281226	0.0427579	0.705123
SNOWBALL_020767_x_st	LOC100624621	7.25155	7.04461	6.89847	7.12674	6.76432	7.06308	7.13567	7.09104	1.15423	-1.17143	-1.23009	1.03141	0.0392	0.0248	0.0051	0.6348	0.173403	0.127777	0.0431412	0.832994
SNOWBALL_046700_st	NFIX	5.64845	5.6629	5.92608	5.73934	5.96274	5.65635	5.89537	5.82453	-1.01006	1.1382	1.2366	1.05033	0.8804	0.0657	0.0051	0.4644	0.953417	0.240975	0.0431795	0.721688
SNOWBALL_020721_st	ZNF75D	7.30797	7.23741	7.1798	7.30368	7.25549	7.47209	7.36291	7.36024	1.05013	-1.08966	-1.162	1.00185	0.3077	0.0829	0.0052	0.9687	0.587594	0.278037	0.0436458	0.988241
SNOWBALL_002407_st	TXNL1	6.83336	6.66599	6.78113	6.73306	6.5822	6.88535	6.64135	6.63023	1.12301	1.03388	-1.23384	1.00774	0.0942	0.6163	0.0053	0.9074	0.300749	0.822404	0.044389	0.964494
SNOWBALL_016539_st	EWSR1	8.65951	8.61791	8.2696	8.20971	8.22562	8.43127	8.29572	8.27147	1.02926	1.04239	-1.1532	1.01695	0.524	0.3622	0.0053	0.7091	0.763827	0.63829	0.0445581	0.873397
SNOWBALL_034502_st	SCARA3	7.79449	7.90826	8.04187	8.12086	8.00141	8.26849	8.05224	8.18427	-1.08205	-1.05628	-1.20337	-1.09584	0.1892	0.3551	0.0054	0.131	0.451304	0.631944	0.0446168	0.365699
SNOWBALL_012486_st	CTSC	9.19721	9.14116	8.06604	8.39837	7.55571	8.04473	7.37959	7.51722	1.03962	-1.25905	-1.40349	-1.1001	0.7177	0.0444	0.0055	0.3797	0.877855	0.187783	0.0452059	0.653562
SNOWBALL_017000_st	CRTAC1	4.7599	4.97097	4.92094	4.80263	4.97705	4.50201	5.20829	5.08873	-1.15755	1.08546	1.38996	1.0864	0.1746	0.4375	0.0056	0.4328	0.431204	0.700846	0.0460712	0.697269
SNOWBALL_004207_st	PCSK6	7.08025	7.13432	7.50881	7.18172	7.38455	7.04636	6.936	6.86333	-1.03819	1.25449	1.26418	1.05166	0.6164	0.007	0.0056	0.5022	0.822483	0.0538528	0.0461978	0.748628
SNOWBALL_014618_s_st	ABCC3	5.7317	5.90781	6.15039	6.11523	6.55715	6.12138	6.41617	6.36257	-1.12983	1.02467	1.35264	1.03785	0.2151	0.7999	0.0056	0.6996	0.484708	0.917808	0.0462988	0.868647
SNOWBALL_005581_st	WISP1	7.46603	7.74395	7.92361	8.27588	7.93335	8.36825	7.97599	8.39682	-1.21245	-1.27657	-1.35182	-1.3387	0.0594	0.0205	0.0059	0.0073	0.226121	0.112385	0.0476175	0.0552754
SNOWBALL_036848_st	STK17A	6.52176	6.3756	6.30031	6.20233	6.15115	5.81624	6.28986	6.21406	1.10662	1.07027	1.2613	1.05395	0.1857	0.3677	0.006	0.4835	0.446556	0.643096	0.0480589	0.735516
SNOWBALL_033374_st	PCM1	1.82146	1.47453	1.6402	1.57868	1.47566	2.02942	1.4307	1.48523	1.27185	1.04357	-1.46791	-1.03852	0.0652	0.7301	0.0061	0.7597	0.239792	0.884017	0.0486356	0.898624
SNOWBALL_029658_st	MCUR1	6.22882	6.31013	6.17761	6.26732	5.98681	6.34098	6.07361	6.13588	-1.05798	-1.06415	-1.27825	-1.04411	0.4789	0.4355	0.0061	0.5864	0.732064	0.69933	0.0488031	0.804169
SNOWBALL_045635_st	DCAF7	7.19087	7.42452	7.20371	7.52373	7.45192	8.00349	7.65445	8.21689	-1.1758	-1.24835	-1.46568	-1.47676	0.2057	0.0897	0.0067	0.0059	0.472956	0.291672	0.0520613	0.0476178
SNOWBALL_037791_s_st	IL1RAP	7.85925	7.66323	7.88486	7.58407	7.64083	7.15601	7.76891	7.18529	1.14553	1.23182	1.39941	1.49861	0.2492	0.0852	0.0093	0.0026	0.525733	0.282703	0.0653419	0.0266264
SNOWBALL_000123_s_st	PECAM1	4.37814	4.67798	4.16723	4.8642	4.52001	5.21567	4.31431	5.08606	-1.231	-1.6211	-1.61962	-1.70735	0.2269	0.01	0.0101	0.0052	0.499223	0.068871	0.0694136	0.04359
SNOWBALL_036143_st	IL1RAP	7.5249	6.99532	7.46867	6.98677	7.2093	6.69294	7.32773	6.7229	1.44351	1.39659	1.43034	1.52081	0.0105	0.018	0.0122	0.0045	0.0714561	0.103058	0.0791887	0.0391448
SNOWBALL_019057_s_st	CST3	8.12567	8.07816	8.72876	8.49778	9.03947	8.73856	9.21208	8.83155	1.03348	1.17363	1.23192	1.30183	0.6665	0.0486	0.0134	0.0029	0.850694	0.199176	0.0840891	0.0284552
SNOWBALL_046260_st		1.94401	1.91007	1.63926	2.05858	2.35983	1.86735	2.52105	1.90111	1.0238	-1.33729	1.40687	1.53682	0.8518	0.0322	0.0141	0.0032	0.94118	0.152473	0.08727	0.0306745
SNOWBALL_013235_st	KCTD3	8.05937	7.97443	8.30372	8.14183	8.36366	8.18289	8.24697	8.02963	1.06065	1.11875	1.13349	1.16259	0.2291	0.0299	0.0171	0.0056	0.501851	0.145034	0.0993955	0.0459236
SNOWBALL_012755_s_st	ETS1	8.5874	8.61061	8.21696	8.37483	7.96655	8.21424	7.68927	8.00529	-1.01622	-1.11563	-1.18731	-1.24489	0.8174	0.13	0.0235	0.0056	0.925842	0.36412	0.123162	0.0462315
SNOWBALL_000427_s_st	NNAT	5.53526	5.66589	5.38011	5.67764	5.22273	5.76447	5.00311	5.75688	-1.09477	-1.22904	-1.45573	-1.68619	0.5582	0.192	0.0246	0.0033	0.786223	0.455041	0.127201	0.0314701
SNOWBALL_028094_st	IL1RAP	8.2423	7.79456	8.16789	7.69971	7.98389	7.55141	8.191	7.576	1.3639	1.38336	1.34955	1.53156	0.0207	0.0163	0.0247	0.0028	0.113204	0.0963635	0.127447	0.0280863
SNOWBALL_035936_st	LOC100519166	5.18717	5.09417	5.40258	4.78559	5.56644	5.10714	5.94257	5.29744	1.06659	1.53366	1.37487	1.56388	0.6433	0.0065	0.0332	0.0048	0.837868	0.0507671	0.155494	0.0411571
SNOWBALL_023863_st	CYP4V2	2.81087	2.68236	2.71641	2.77691	2.84167	3.17214	3.26748	2.74634	1.09316	-1.04283	-1.25742	1.43509	0.3841	0.6791	0.0352	0.0023	0.657203	0.857658	0.161491	0.0239908
SNOWBALL_036842_st	STK17B	4.74799	4.7256	5.13325	5.16681	5.22441	5.45295	4.99029	5.38414	1.01564	-1.02353	-1.17165	-1.3139	0.8315	0.75	0.0422	0.0016	0.932152	0.894033	0.181741	0.0183254
SNOWBALL_007892_st	CDH13	6.34949	6.71366	5.97247	6.36552	5.82489	6.32855	5.24341	6.1186	-1.28714	-1.31316	-1.4178	-1.83425	0.1362	0.1098	0.0454	0.0017	0.374118	0.329591	0.190587	0.0193308
SNOWBALL_047841_st	PKDCC	3.09017	2.74452	3.51195	3.18114	3.69371	3.39831	3.97415	3.52455	1.27072	1.25772	1.22722	1.36566	0.0271	0.0334	0.0541	0.006	0.135806	0.156063	0.21304	0.048447
SNOWBALL_018685_s_st	GABRP	9.27859	9.27277	9.196	9.65842	8.98078	9.36876	9.06379	9.78892	1.00405	-1.37785	-1.30856	-1.65305	0.9769	0.0331	0.0681	0.0021	0.991225	0.15525	0.246382	0.0230089
SNOWBALL_042559_st	SSBP3	2.60263	2.43455	2.56148	2.57828	2.67062	2.93059	2.96809	2.4627	1.12356	-1.01171	-1.19745	1.41951	0.2276	0.9018	0.0701	0.0017	0.500124	0.962274	0.250992	0.0192689
SNOWBALL_018676_st	PLPP1,SLC38A9	9.88208	9.74576	9.92406	9.70505	9.82658	9.65542	9.78357	9.49479	1.09909	1.16394	1.12597	1.22161	0.1458	0.0258	0.0729	0.0051	0.389092	0.131301	0.25694	0.0433098
SNOWBALL_015881_st	LOC100152428	7.06205	7.06601	7.24265	7.25442	7.24885	7.45184	6.93028	7.26724	-1.00274	-1.00819	-1.15108	-1.2631	0.9709	0.9135	0.075	0.0061	0.989025	0.967077	0.26171	0.0486069
SNOWBALL_008213_s_st	CEP104	6.01445	6.21177	6.26171	6.10739	6.33812	6.21832	6.13085	6.36403	-1.14657	1.1129	1.08658	-1.17542	0.0106	0.038	0.0982	0.0035	0.0718359	0.169858	0.308399	0.0331109
SNOWBALL_021036_s_st	SLC30A1	7.16475	7.07223	6.91989	6.768	6.87443	6.75038	6.84855	6.56229	1.06623	1.11102	1.08979	1.21947	0.2196	0.0522	0.106	0.0011	0.490375	0.208135	0.322767	0.0145986
SNOWBALL_002508_st	PREP	7.30628	7.4337	7.40733	7.53338	7.70748	7.82392	7.58746	7.81375	-1.09234	-1.0913	-1.08405	-1.16982	0.0818	0.0848	0.109	0.0045	0.275616	0.282034	0.328178	0.0396803
SNOWBALL_014581_st		5.49614	5.62386	5.65253	5.70305	5.90305	5.75706	5.80494	5.4036	-1.09257	-1.03564	1.10649	1.32074	0.1602	0.5683	0.1117	0.0003	0.410842	0.792867	0.332995	0.00521285
SNOWBALL_012790_st	SEMA3C	9.8749	9.7624	9.918	9.69168	9.79088	9.64192	9.62119	9.29189	1.0811	1.16985	1.10877	1.25641	0.2225	0.0213	0.1122	0.0019	0.493774	0.115164	0.333935	0.0210086
SNOWBALL_013222_s_st	LOC100736782	7.5381	7.48612	7.48384	7.4374	7.35877	7.45524	7.54439	7.35542	1.03669	1.03272	-1.06916	1.13995	0.3795	0.4312	0.1129	0.0047	0.653352	0.695972	0.335028	0.0404321
SNOWBALL_006756_x_st	LOC100624537	5.35198	5.24369	5.30229	5.25376	5.21672	5.37593	5.72761	5.36185	1.07795	1.03421	-1.11668	1.28857	0.2747	0.6192	0.1158	0.0015	0.55379	0.824128	0.340109	0.0178925
SNOWBALL_043349_st	COLEC12	8.87991	8.57126	8.54809	8.35056	8.02389	7.80774	8.24794	7.79548	1.23855	1.14673	1.16163	1.36838	0.0341	0.1576	0.1242	0.0037	0.158255	0.406992	0.354376	0.0342144
SNOWBALL_014721_st	UNC45B	7.09718	7.17305	7.11649	7.06675	6.74004	6.43867	5.75567	6.4307	-1.054	1.03508	1.23232	-1.59663	0.6909	0.7941	0.1273	0.0024	0.863998	0.915019	0.359526	0.0249846
SNOWBALL_016968_s_st	ACSL5	7.28438	7.08244	6.90279	6.73938	6.90764	6.77169	7.01631	6.68571	1.15024	1.11993	1.09881	1.25754	0.0373	0.0847	0.1457	0.0019	0.167735	0.281634	0.389046	0.0208981
SNOWBALL_018178_st	ACADL	7.49909	7.52679	7.97362	7.67632	8.22671	8.05309	8.45138	8.07988	-1.01938	1.22884	1.12788	1.2937	0.8123	0.0197	0.1498	0.0052	0.923427	0.109487	0.395206	0.0434432
SNOWBALL_027930_st	MSX2	3.75351	3.7633	3.91716	3.65594	3.77635	3.62423	3.54323	3.1844	-1.00681	1.19849	1.1112	1.28239	0.9305	0.0309	0.1872	0.005	0.973997	0.148422	0.448708	0.0426463
SNOWBALL_010905_st	LOC100153863	2.47996	2.44805	2.45269	2.53414	2.39011	2.49822	2.48297	2.8135	1.02236	-1.05808	-1.07781	-1.25747	0.6995	0.3307	0.2017	0.0009	0.868632	0.609618	0.467792	0.012215
SNOWBALL_011428_st	NAAA	4.23747	4.24335	4.68034	4.62804	5.08591	4.91337	5.17342	4.74774	-1.00409	1.03691	1.12704	1.3432	0.9647	0.6949	0.2062	0.005	0.98669	0.866171	0.473525	0.0426022
SNOWBALL_030643_st	GPC6	1.88983	1.70605	2.06734	2.05895	2.2014	1.95471	2.58388	1.9103	1.13586	1.00583	1.18648	1.59502	0.3524	0.9657	0.2169	0.0029	0.629469	0.98704	0.487019	0.0287144
SNOWBALL_033568_st	SEMA3C	5.42068	5.10477	5.49329	5.0047	5.24542	5.05375	5.20545	4.27303	1.2448	1.40307	1.14208	1.90847	0.0863	0.0121	0.2838	< 0.001	0.284906	0.0788165	0.563448	0.00165376
SNOWBALL_004664_st	TXNDC11	6.16411	6.13856	6.08054	5.98605	5.97246	6.03158	6.33878	5.90741	1.01787	1.06768	-1.04182	1.34852	0.7768	0.3021	0.5142	0.0002	0.906591	0.582223	0.757036	0.00361825
SNOWBALL_033198_st	CENPC	4.44206	4.25685	4.25747	4.22034	4.02849	4.03143	4.09973	3.78873	1.13699	1.02607	-1.00204	1.24057	0.0127	0.5816	0.9651	0.0002	0.0812474	0.801233	0.986811	0.00459831
SNOWBALL_034436_st	FAM46C	4.70796	4.32342	4.22285	4.23503	4.53177	4.56371	4.78837	4.17927	1.30545	-1.00848	-1.02238	1.52532	0.0099	0.9273	0.8111	0.0003	0.0684334	0.972735	0.922824	0.00515793
SNOWBALL_004480_st	TNFRSF17	3.3836	3.21695	3.54482	3.13854	3.57393	3.55045	3.88666	3.07983	1.12245	1.32527	1.01641	1.74937	0.3579	0.0347	0.8956	0.0003	0.634608	0.160134	0.959656	0.00557387
SNOWBALL_007493_s_st	TEAD4	5.23995	5.26478	5.3527	5.46965	5.40077	5.39424	5.00872	5.48935	-1.01736	-1.08444	1.00454	-1.39535	0.8249	0.3052	0.9536	0.0005	0.929252	0.58518	0.982668	0.00792823
SNOWBALL_047515_st	TULP4	1.64513	1.60032	1.73906	1.91466	1.87733	1.75859	1.83047	2.36927	1.03154	-1.12944	1.08579	-1.45276	0.7261	0.1813	0.3587	0.0006	0.882011	0.440548	0.635225	0.00875749
SNOWBALL_033994_st	SEMA3C	8.17574	8.11485	8.24197	8.02959	8.24283	8.14905	8.04392	7.57131	1.04311	1.1586	1.06716	1.38762	0.5966	0.0779	0.4178	0.0007	0.810335	0.267661	0.685196	0.0101666
SNOWBALL_001191_st	MIC-1	6.46493	6.62474	6.23392	6.28946	5.80208	5.72287	5.59467	5.2216	-1.11714	-1.03925	1.05644	1.29511	0.1045	0.558	0.4062	0.001	0.319832	0.786155	0.675685	0.0132157
SNOWBALL_021288_s_st	PLXNC1	4.07493	4.118	4.1837	4.15878	4.59623	4.34365	5.24199	4.3956	-1.0303	1.01742	1.19134	1.79799	0.8422	0.9083	0.2528	0.0011	0.936852	0.964858	0.529791	0.0141056
SNOWBALL_031746_st	PLCB1	6.43328	6.21779	5.93729	6.04229	6.00731	5.98837	5.92799	5.51206	1.1611	-1.07549	1.01321	1.33416	0.0564	0.3311	0.8588	0.0011	0.218665	0.610003	0.944153	0.0142213
SNOWBALL_041192_st	NFXL1	2.08827	2.01051	2.10695	2.0662	2.09284	2.04085	2.41194	1.87594	1.05538	1.02864	1.0367	1.44994	0.5801	0.7712	0.7107	0.0013	0.800342	0.904021	0.874239	0.016049
SNOWBALL_040854_st	FZD1	3.18152	3.08094	3.65681	3.09001	3.68644	3.50877	4.14	3.35613	1.0722	1.48124	1.13106	1.72175	0.6311	0.014	0.3999	0.0015	0.830874	0.0866848	0.670461	0.0180137
SNOWBALL_036211_st	PRX	3.29012	3.57428	3.2815	3.35221	3.27407	3.29523	3.57618	3.00639	-1.2177	-1.05023	-1.01478	1.4843	0.0763	0.6437	0.8895	0.0016	0.264375	0.838046	0.957094	0.0184734
SNOWBALL_026931_s_st	FRA10AC1	5.23996	4.92586	5.52631	4.70408	5.22281	5.04524	5.22855	3.28326	1.24323	1.76814	1.13098	3.85114	0.5557	0.1347	0.7381	0.0018	0.784679	0.371524	0.888181	0.0206242
SNOWBALL_036756_st	ZBTB7A	6.29018	5.98167	5.8941	5.94024	6.29805	6.17195	6.45518	5.94008	1.23843	-1.0325	1.09134	1.42909	0.0408	0.7436	0.3766	0.0019	0.177968	0.890914	0.651028	0.0210365
SNOWBALL_019892_st	PDE1C	6.52615	6.43049	6.54751	6.44378	6.63499	6.66322	6.07916	6.50446	1.06855	1.07455	-1.01976	-1.34285	0.4178	0.3805	0.8093	0.002	0.68517	0.65422	0.921947	0.0215714
SNOWBALL_044585_st	TRIM68	1.44327	1.2821	1.35549	1.40601	1.44795	1.53366	1.28052	1.79172	1.11819	-1.03564	-1.06121	-1.42524	0.2724	0.7262	0.5539	0.0024	0.551247	0.88209	0.783599	0.0248643
SNOWBALL_009232_st	UTP11	7.13061	7.09176	7.23641	7.20245	7.08014	7.1472	7.27302	6.95449	1.02729	1.02381	-1.04758	1.24706	0.6661	0.7059	0.4589	0.0024	0.850501	0.871736	0.717434	0.0249079
SNOWBALL_023113_s_st	HDLBP	9.65135	9.69137	9.7698	9.79723	9.85441	9.82956	10.0282	9.82937	-1.02813	-1.0192	1.01737	1.14776	0.481	0.6276	0.6602	0.0025	0.733608	0.828888	0.847338	0.02567
SNOWBALL_012911_s_st	SRGAP2	6.272	6.44088	6.35859	6.47963	6.42045	6.5191	6.60893	6.22539	-1.12418	-1.08752	-1.07077	1.30455	0.1482	0.2923	0.388	0.0033	0.392823	0.572227	0.660643	0.0315074
SNOWBALL_005613_st	ZHX1	7.30429	7.3335	7.41023	7.29745	7.61647	7.56346	7.75968	7.51603	-1.02045	1.08131	1.03742	1.18398	0.6852	0.1305	0.4646	0.0033	0.860932	0.364783	0.72179	0.031827
SNOWBALL_007283_st	KLHL42	7.59081	7.75949	7.58606	7.63631	7.48076	7.56321	7.08854	7.36465	-1.12403	-1.03544	-1.05882	-1.21092	0.0519	0.5403	0.3198	0.0034	0.207337	0.774824	0.599409	0.0320897
SNOWBALL_026429_st	EHD4	8.19923	8.30193	7.97202	7.85721	7.97326	8.06229	7.63317	8.03684	-1.07378	1.08283	-1.06366	-1.32286	0.3953	0.3433	0.4599	0.0034	0.666878	0.621235	0.718213	0.0323331
SNOWBALL_027644_st	FAM20C	5.46492	5.70357	5.68421	5.53402	5.34889	5.48542	5.40627	5.01164	-1.17989	1.10972	-1.09926	1.31461	0.0558	0.2127	0.2553	0.0036	0.217193	0.481488	0.532422	0.0334631
SNOWBALL_027444_st	POLR3D	5.30028	5.2202	5.1744	4.94669	4.85415	4.90452	5.13188	4.70511	1.05708	1.17097	-1.03553	1.34422	0.5319	0.088	0.6931	0.0036	0.769123	0.288437	0.865218	0.0337559
SNOWBALL_041253_st	TGFB2	2.44433	2.65285	2.69555	2.67929	2.59469	2.5576	2.66676	2.2111	-1.1555	1.01134	1.02605	1.37141	0.1424	0.9057	0.7872	0.0039	0.383955	0.963856	0.911721	0.0355564
SNOWBALL_029677_st		1.27135	1.25939	1.33174	1.56371	1.33541	1.29111	1.65686	1.29793	1.00832	-1.17444	1.03119	1.28248	0.9131	0.0471	0.6866	0.0043	0.966902	0.194984	0.861718	0.037876
SNOWBALL_026846_s_st	IGF2	6.48311	6.57838	6.55992	6.83172	6.73638	6.84757	6.72934	7.09449	-1.06826	-1.20731	-1.08012	-1.28801	0.3982	0.0248	0.3261	0.0043	0.669066	0.127886	0.60529	0.0379617
SNOWBALL_024477_s_st	PPA1	6.47997	6.31326	6.42021	6.11973	6.04525	6.18156	6.20345	6.5699	1.1225	1.23156	-1.0991	-1.28917	0.1518	0.0154	0.2362	0.0044	0.398196	0.0924228	0.510399	0.0390575
SNOWBALL_042189_st	LPP	3.91463	3.87954	4.12494	3.97789	4.33505	4.21028	4.56866	3.87468	1.02462	1.1073	1.09033	1.61773	0.8693	0.4935	0.5605	0.0045	0.948787	0.742705	0.787823	0.0391537
SNOWBALL_040079_st	GNG12	2.90988	2.92495	3.05708	2.9708	3.20594	3.30638	3.41814	3.14145	-1.0105	1.06163	-1.0721	1.21142	0.8624	0.3283	0.2577	0.0052	0.945768	0.607471	0.535124	0.0437033
SNOWBALL_033243_st	SF3B3	8.34815	8.31857	8.17341	8.09793	8.06414	8.09078	8.06863	7.86928	1.02071	1.05371	-1.01863	1.14818	0.6404	0.2419	0.6738	0.0055	0.836254	0.517243	0.854821	0.045235
SNOWBALL_023717_s_st	EIF2S2	5.14545	5.22682	5.08737	5.20763	5.08807	5.07868	5.22978	4.95891	-1.05802	-1.08694	1.00653	1.20653	0.3514	0.1751	0.9132	0.0056	0.62857	0.43196	0.966971	0.0461946
SNOWBALL_003535_st	RPL4	5.69782	5.4994	5.34505	5.08055	5.46239	5.16099	5.85985	5.05814	1.14744	1.20122	1.23234	1.74316	0.4437	0.3107	0.2502	0.0059	0.705937	0.590697	0.526931	0.047743
[truncated: 2 more rows]

## Sheet: Table S5
Table S5: Enriched gene ontology (GO) terms and Enriched Kyoto Encyclopaedia of Genes and Genomes (KEGG) pathways assigned to myoblasts derived from donor piglet age 5 (P5) and 20 (P20) days after 72 h of proliferation permanently cultured at 35°, 37°, 39° or 41°C.
[truncated: 71 more rows]

[truncated: 2 more sheets: Table S6, Table S7]
